# Supplementary material for: Electroreductive carboxylation of benzylphosphonium salts with CO2 through the cleavage of the C(sp3)–P bond
Source: Royal Society of Chemistry journal article supplement (doi:10.1039/d4ob00838c), 2024-01-01

# Electroreductive Carboxylation of Benzylphosphine Salts with CO<sub>2</sub> through the Cleavage of the C(sp<sup>3</sup>)-P Bond

Fen Han,<sup>†</sup> Fenfen Xie,<sup>†</sup> Mengyun Yin,\* Linhai Jing,\* Pan Han\*

*Chemical Synthesis and Pollution Control Key Laboratory of Sichuan Province, College of Chemistry and  
Chemical Engineering, China West Normal University, Nanchong 637002, China;*

*E-mail: ymy07280920@163.com; jlhxg@cwnu.edu.cn; panhan0920@cwnu.edu.cn*

<sup>†</sup>These authors contributed equally to this work.

## Supporting Information

|                                                                            |     |
|----------------------------------------------------------------------------|-----|
| 1. General Information.....                                                | S2  |
| 2. General procedure for the synthesis of <b>1</b> .....                   | S2  |
| 3. General procedure for the synthesis of aryl acetic acids <b>2</b> ..... | S2  |
| 4. Experiment details for gram-scale synthesis of product .....            | S3  |
| 5. Procedure of controlled experiments. ....                               | S3  |
| 6. Cyclic voltammetry experiments .....                                    | S6  |
| 7. Characterization data for compounds <b>1</b> and <b>2</b> .....         | S7  |
| 8. References.....                                                         | S21 |
| 9. NMR Spectra of Coupled Products.....                                    | S22 |

## 1. General Information

All the electrochemical reactions were performed in an oven-dried undivided electrochemical cell unless otherwise noted. The amount of electricity consumed per mole of reactant is measured by an ampere hour meter. THF was distilled from sodium/benzophenone. Anhydrous DMF, DMA, NMP and DMSO were purchased from Adamas-beta and used without further purification. All commercial reagents were purchased from Acros Organics, Sigma-Aldrich, Alfa Aesar, Adamas-beta, Bidepharm, and Energy Chemical of the highest purity grade.  $^1\text{H}$  NMR and  $^{13}\text{C}$  NMR spectra were recorded respectively at 400 MHz and 100 MHz on a Bruker AVANCE 400 and chemical shifts are reported in  $\delta$  (ppm) referenced to residual undeuterated solvent signal for  $^1\text{H}$  NMR (7.26 ppm for  $\text{CDCl}_3$  or 2.54 ppm for  $\text{DMSO-}d_6$ ),  $^{13}\text{C}$  NMR (77.16 ppm for  $\text{CDCl}_3$  or 40.45 ppm for  $\text{DMSO-}d_6$ ). HRMS was conducted on a Thermo Scientific LTQ Orbitrap XL apparatus using an electrospray (ESI) or MALDI ionization source. The following abbreviations were used to designate chemical shift multiplicities: s = singlet, d = doublet, t = triplet, q = quartet, m = multiplet. All the electrochemical reactions were performed with an HY3005B DC (30 V) power supply purchased from Zhejiang Huayi Electronic Industry Co., Ltd. Carbon rod and graphite felt (GF) was purchased from Beijing Jinglong special carbon technology Co., Ltd. Platinum electrode, Al electrode, and Zn electrode are all purchased from Shanghai yueci Electronic Technology Co., Ltd. Magnesium plate (The purity is 99.95%) was purchased from Xintong Weiye Metal Material Sales Co., Ltd.

## 2. General procedure for the synthesis of 1.

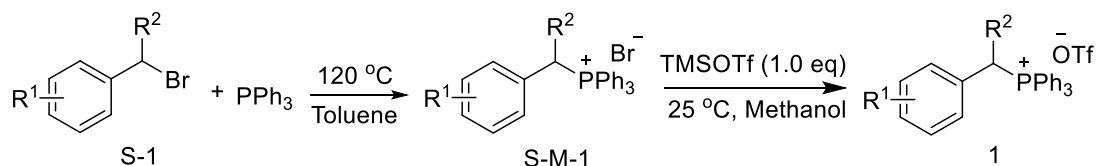

To a solution of substituted benzyl bromide **S-1** (3.4 g, 20.0 mmol) in toluene (20 mL) was added triphenylphosphine (5.2 g, 20.0 mmol). The solution was refluxed for 16 h to form a White suspension. After filtration at room temperature, the White powder was washed with cyclohexane and dried under vacuo to give the pure phosphonium bromide salt **S-M-1**<sup>1</sup>. To a solution of phosphonium bromide salt **S-M-1** (2.2 g, 5.0 mmol) in methanol (10 mL) was added trimethylsilyl trifluoromethanesulfonate (TMSOTf, 0.9 mL, 5.0 mmol). The solution was stirred for 4 hours, and concentrated under reduced pressure. Dissolve the crude product in a small amount of acetone and add ether for recrystallization to give the corresponding phosphonium trifluoromethanesulfonate salt **1**.

## 3. General procedure for the synthesis of aryl acetic acids 2.

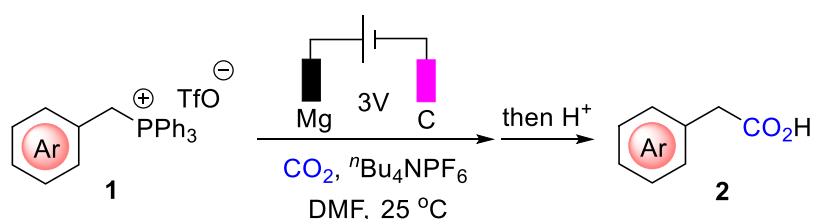

The electrolysis was conducted in an undivided cell equipped with a Mg anode (15 mm x 10 mm x 2 mm) and a C cathode ( $\varphi = 6$  mm) with a distance of about 1.0 cm between the two electrodes, and the depth of each electrode immersed in the reaction mixture is about 10 mm. To a 15 mL oven-dried undivided electrochemical cell were added benzyl triphenyl phosphonium salt **1** (0.2 mmol),  ${}^n\text{Bu}_4\text{NPF}_6$  (193.7 mg, 0.5 mmol) and followed by the addition of solvent DMF (5 mL, 0.1 M) in the glove box. Then, seal the tube and remove it from the glove box. After bubbling  $\text{CO}_2$  gas into the mixture for 10 min, the electrolysis was carried out with constant voltage electrolysis (cell voltage = 5 V) at 25 °C for 7 h under a  $\text{CO}_2$  balloon. The resulting mixture is transferred to a separator funnel for preparing the reaction solution at the beginning. The cell was washed with ethyl acetate (2 mL x 2) twice. The combined organic solution was acidified ( $\text{pH} < 2$ ) by the addition of 1 M HCl and extracted with ethyl acetate (5 x 3 mL). The combined organic layers were washed with water, brine, dried over anhydrous  $\text{Na}_2\text{SO}_4$ , filtered, and concentrated in vacuo. The residue was purified by flash chromatography (PE/EA) to afford aryl acetic acids **2**.

#### 4. Experiment details for gram-scale synthesis of product

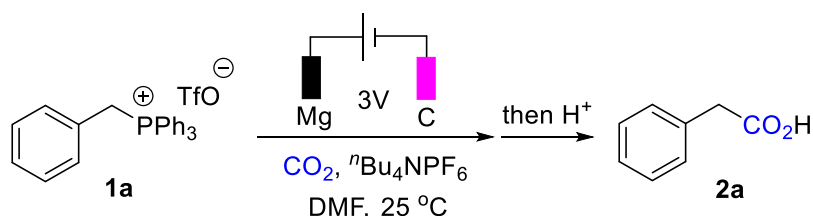

The electrolysis was conducted in an undivided cell equipped with a Mg anode (50 mm x 30 mm x 2 mm) and a C cathode ( $\varphi = 6$  mm) with a distance of about 5.0 cm between the two electrodes, and the depth of each electrode immersed in the reaction mixture is about 20 mm. To a 250 mL oven-dried undivided electrochemical cell were added benzyltriphenylphosphonium trifluoromethanesulfonate **1a** (2.1 g, 4.0 mmol),  ${}^n\text{Bu}_4\text{NPF}_6$  (3.9 g, 10.0 mmol) and followed by the addition of solvent DMF (100 mL, 0.1 M) in the glove box. Then, seal the tube and remove it from the glove box. After bubbling  $\text{CO}_2$  gas into the mixture for 10 min, the electrolysis was carried out with constant voltage electrolysis (cell voltage = 5 V) at 25 °C for 7 h under a  $\text{CO}_2$  balloon. The resulting mixture is transferred to a separator funnel for preparing the reaction solution at the beginning. The cell was washed with ethyl acetate (5 mL x 2) twice. The combined organic solution was acidified ( $\text{pH} < 2$ ) by addition of 1 M HCl and extracted with ethyl acetate (30 x 3 mL). The combined organic layers were washed with water, brine, dried over anhydrous  $\text{Na}_2\text{SO}_4$ , filtered and concentrated in vacuo. The residue was purified by flash chromatography (PE/EA) to afford aryl acetic acids **2a**.

#### 5. Procedure of controlled experiments.

##### 5.1 Radical trapping experiment with TEMPO.

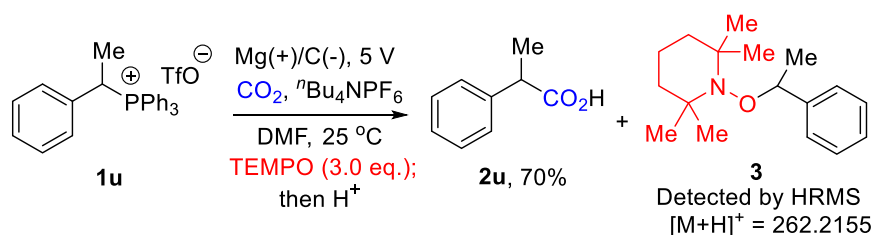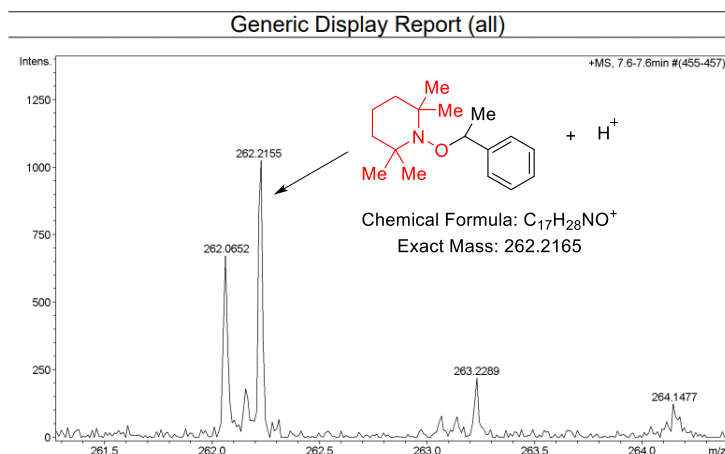

**Figure S1** The HRMS spectra of compound **3**.

The electrolysis was conducted in an undivided cell equipped with a Mg anode (15 mm x 10 mm x 2 mm) and a C cathode ( $\varphi = 6$  mm) with a distance of about 1.0 cm between the two electrodes, and the depth of each electrode immersed in the reaction mixture is about 10 mm. To a 15 mL oven-dried undivided electrochemical cell were added triphenyl(1-phenylethyl)phosphonium trifluoromethanesulfonate **1u** (0.2 mmol),  ${}^n\text{Bu}_4\text{NPF}_6$  (193.7 mg, 0.5 mmol), TEMPO (3.0 equiv.), and followed by the addition of solvent DMF (5 mL, 0.1 M) in the glove box. Then, seal the tube and remove it from the glove box. After bubbling  $\text{CO}_2$  gas into the mixture for 10 min, the electrolysis was carried out with constant voltage electrolysis (cell voltage = 5V) at 25  $^\circ\text{C}$  for 7 h under a  $\text{CO}_2$  balloon. The resulting mixture is transferred to a separator funnel for preparing the reaction solution at the beginning. The cell was washed with ethyl acetate (2 mL x 2) twice. The combined organic solution was acidified ( $\text{pH} < 2$ ) by addition of 1 M HCl and extracted with ethyl acetate (5 x 3 mL). The combined organic layers were washed with water, brine, dried over anhydrous  $\text{Na}_2\text{SO}_4$ , filtered and concentrated in vacuo to achieve the crude residue. The crude yield was 70% which was determined by  ${}^1\text{H}$  NMR analysis using 1,3,5-trimethoxybenzene as internal standard. Also, the crude residue was tested with HRMS. The adduct of TEMPO with benzyl radical was detected by HRMS (ESI): HRMS (ESI)  $m/z$ :  $[\text{M}+\text{H}]^+$  Calcd for  $\text{C}_{17}\text{H}_{28}\text{NO}^+$  262.2165; Found = 262.2155.

## 5.2 Radical trapping experiment with thiophene.

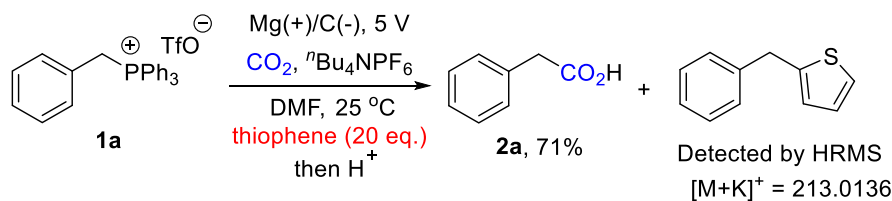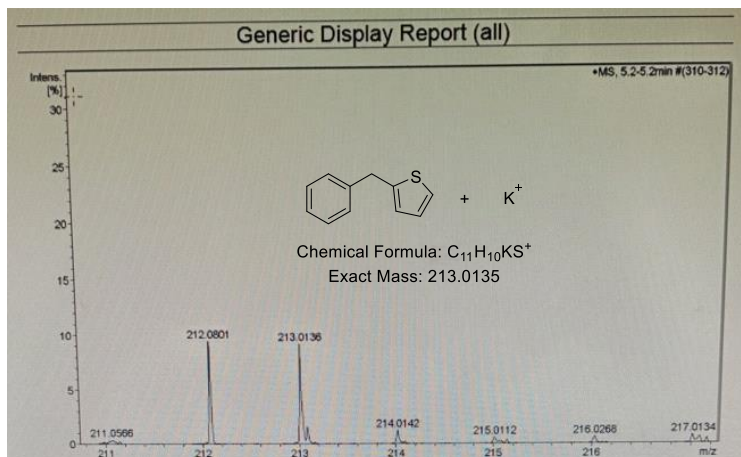

The radical trapping experimental procedure with thiophene (4.0 mmol, 20 eq.) as the radical scavenger was the same as **procedure 5.1**. The crude yield was 71%.

### 5.3 Deuteration experiment.

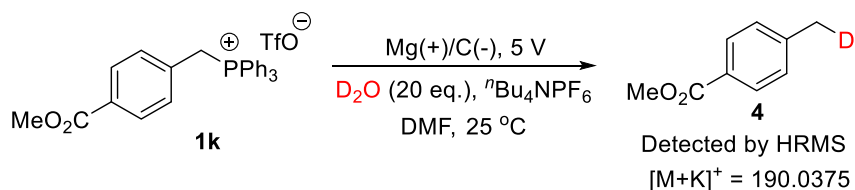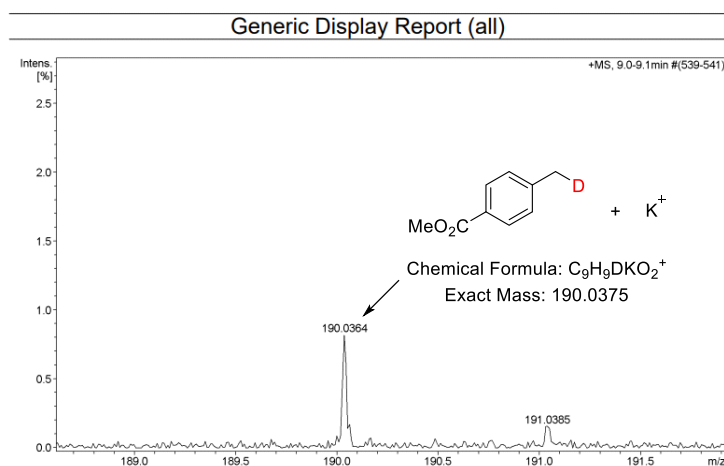

**Figure S2** The HRMS spectra of compound **4**.

The electrolysis was conducted in an undivided cell equipped with a Mg anode (15 mm x 10 mm x 2 mm) and a C cathode ( $\varphi = 6$  mm) with a distance of about 1.0 cm between the two electrodes, and the depth of each electrode immersed in the reaction mixture is about 10 mm. To a 15 mL oven-dried undivided electrochemical cell were added (4-(methoxycarbonyl)benzyl)triphenylphosphonium trifluoromethanesulfonate

**1k** (0.2 mmol),  $n\text{Bu}_4\text{NPF}_6$  (193.7 mg, 0.5 mmol),  $\text{D}_2\text{O}$  (4.0 mmol, 20.0 eq.), and followed by the addition of solvent DMF (5 mL, 0.1 M) in the glove box. Then, seal the tube and remove it from the glove box. The electrolysis was carried out with constant voltage electrolysis (cell voltage = 5 V) at 25 °C for 7 h under argon atmosphere. Then, the resulting mixture is transferred to a separator funnel for preparing the reaction solution at the beginning. The cell was washed with ethyl acetate (2 mL x 2) twice. The combined organic solution was extracted with ethyl acetate (5 x 3 mL). The combined organic layers were washed with water, brine, dried over anhydrous  $\text{Na}_2\text{SO}_4$ , filtered and concentrated in vacuo to achieve the crude residue. The crude residue was tested with HRMS. The deuterated product was detected by HRMS (ESI): HRMS (ESI)  $m/z$ :  $[\text{M}+\text{K}]^+$  Calcd for  $\text{C}_9\text{H}_9\text{DKO}_2$  190.0375; Found 190.0364.

## 6. Cyclic voltammetry experiments.

Electrochemical studies were carried out with a CHI600D electrochemical workstation. All cyclic voltammograms were measured at 25 °C using an  $\text{Ag}/\text{Ag}^+$  reference electrode, a platinum (Pt) wire counter electrode and a glassy carbon working electrode (3mm-diameter, disc-electrode). The measurements were carried out at a scan rate of  $100 \text{ mV s}^{-1}$  in DMF/ $n\text{Bu}_4\text{NPF}_6$  (0.1 M). All data are measured in Ar atmosphere.

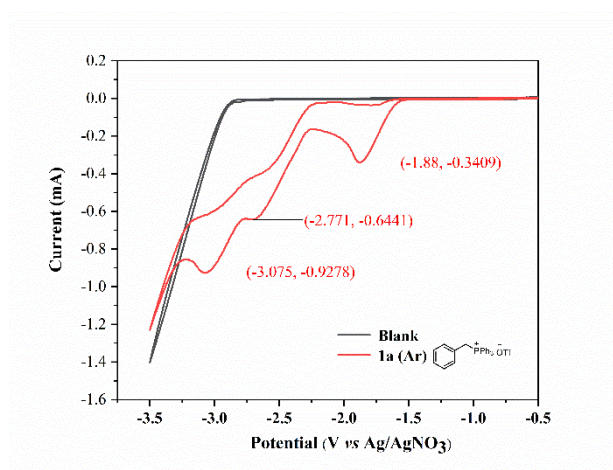

**Figure S3.** Cyclic voltammetry of Blank: (none); **1a** (40 mM);

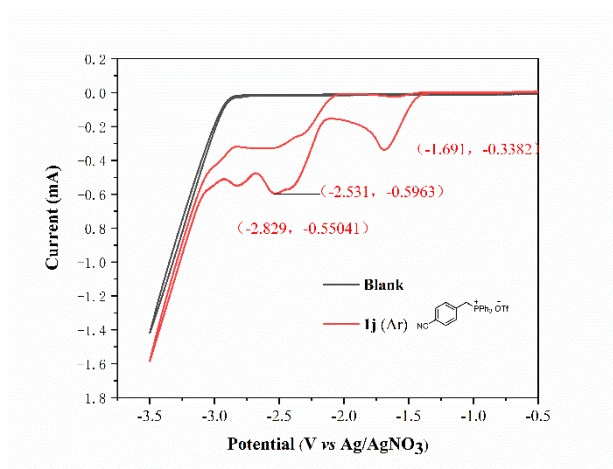

**Figure S4.** Cyclic voltammetry of Blank: (none); **1j** (40 mM);

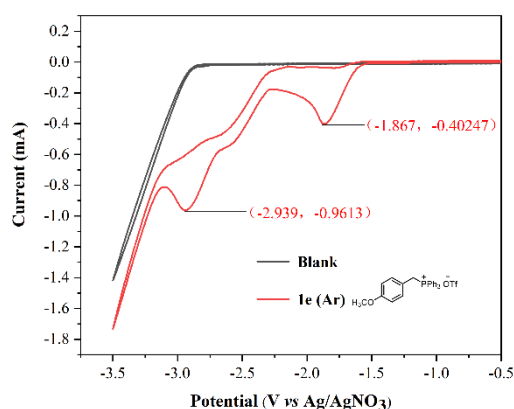

Figure S5. Cyclic voltammetry of Blank: (none); **1e** (40 mM);

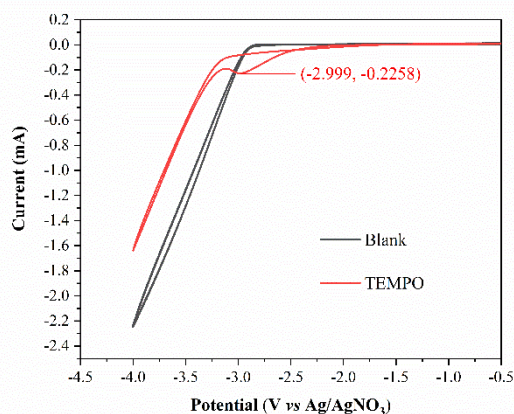

Figure S6. Cyclic voltammetry of Blank: (none); Tempo (20 mM);

## 7. Characterization data for compounds **1** and **2**.

### benzyltriphenylphosphonium trifluoromethanesulfonate (**1a**).

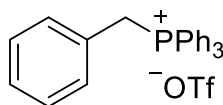

White powder.  $^1\text{H}$  NMR (400 MHz,  $\text{DMSO-}d_6$ )  $\delta$  7.92 – 7.89 (m, 3H), 7.77 – 7.72 (m, 6H), 7.69 – 7.64 (m, 6H), 7.32 – 7.28 (m, 1H), 7.25 – 7.21 (m, 2H), 6.98 – 6.96 (m, 2H), 5.14 (d,  $J = 15.6$  Hz, 2H) ppm.  $^{13}\text{C}$  NMR (100 MHz,  $\text{DMSO-}d_6$ )  $\delta$  135.1 (d,  $J = 2.8$  Hz), 134.0 (d,  $J = 9.9$  Hz), 130.8 (d,  $J = 5.7$  Hz), 130.1 (d,  $J = 12.3$  Hz), 128.8 (d,  $J = 2.9$  Hz), 128.3 (d,  $J = 3.6$  Hz), 127.8 (d,  $J = 8.6$  Hz), 120.7 (q,  $J = 320.6$  Hz) 117.8 (d,  $J = 85$  Hz), 28.2 (d,  $J = 46.6$  Hz) ppm.  $^{31}\text{P}$  NMR (162 MHz,  $\text{DMSO-}d_6$ )  $\delta$  23.1 ppm.  $^{19}\text{F}$  NMR (376 MHz,  $\text{DMSO-}d_6$ )  $\delta$  -77.7 ppm. HRMS (ESI)  $m/z$ :  $[\text{M-OTf}]^+$  Calcd for  $\text{C}_{25}\text{H}_{22}\text{P}$  353.1454; Found 353.1450.

### methylbenzyl)triphenylphosphonium trifluoromethanesulfonate (**1b**).

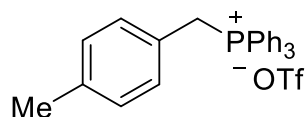

$^1\text{H}$  NMR (400 MHz,  $\text{DMSO-}d_6$ )  $\delta$  7.92 – 7.89 (m, 3H), 7.77 – 7.72 (m, 6H), 7.69 – 7.63 (m, 6H), 7.04 (d,  $J = 7.6$  Hz, 2H), 6.86 – 6.84 (m, 2H), 5.08 (d,  $J = 15.6$  Hz, 2H), 2.23 (d,  $J = 2.0$  Hz, 3H) ppm.  $^{13}\text{C}$  NMR (100 MHz,  $\text{DMSO-}d_6$ )  $\delta$  137.8 (d,  $J = 4.0$  Hz), 135.0 (d,  $J = 2.7$  Hz), 134.0 (d,  $J = 9.8$  Hz), 130.7 (d,  $J = 4.6$  Hz), 130.0 (d,  $J = 12.3$  Hz), 129.3 (d,  $J = 4.0$  Hz), 124.5 (d,  $J = 8.6$  Hz), 120.7 (q, 320.5 Hz), 117.8 (d,  $J = 84.8$  Hz), 27.9 (d,  $J = 46.3$  Hz) ppm.  $^{31}\text{P}$  NMR (162 MHz,  $\text{DMSO-}d_6$ )  $\delta$  22.6 ppm.  $^{19}\text{F}$  NMR (376 MHz,  $\text{DMSO-}d_6$ )  $\delta$  -77.7 ppm. HRMS (ESI)  $m/z$ :  $[\text{M-OTf}]^+$  Calcd for  $\text{C}_{26}\text{H}_{24}\text{P}$  367.1610; Found 367.1606.

**(4-(tert-butyl)benzyl)triphenylphosphonium trifluoromethanesulfonate (1c).**

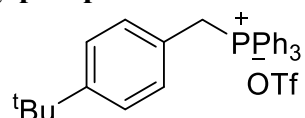

$^1\text{H}$  NMR (400 MHz,  $\text{DMSO-}d_6$ )  $\delta$  7.93 – 7.89 (m, 3H), 7.76 – 7.72 (m, 6H), 7.67 – 7.62 (m, 6H), 7.25 (d,  $J = 8.4$  Hz, 2H), 6.91 – 6.88 (m, 2H), 5.09 (d,  $J = 15.6$  Hz, 2H), 1.22 (s, 9H) ppm.  $^{13}\text{C}$  NMR (100 MHz,  $\text{DMSO-}d_6$ )  $\delta$  151.6 (d,  $J = 4.1$  Hz), 135.6 (d,  $J = 2.8$  Hz), 134.4 (d,  $J = 9.7$  Hz), 130.9 (d,  $J = 5.6$  Hz), 130.6 (d,  $J = 12.3$  Hz), 126.0 (d,  $J = 3.1$  Hz), 125.2 (d,  $J = 8.6$  Hz), 121.2 (q,  $J = 320.5$  Hz), 118.4 (d,  $J = 84.9$  Hz), 34.8, 31.4, 28.2 (d,  $J = 46.6$  Hz) ppm.  $^{31}\text{P}$  NMR (162 MHz,  $\text{DMSO-}d_6$ )  $\delta$  23.03 ppm.  $^{19}\text{F}$  NMR (376 MHz,  $\text{DMSO-}d_6$ )  $\delta$  -77.69 ppm. HRMS (ESI)  $m/z$ :  $[\text{M-OTf}]^+$  Calcd for  $\text{C}_{29}\text{H}_{30}\text{P}$  409.2080; Found 409.2078.

**(4-isobutylbenzyl)triphenylphosphonium trifluoromethanesulfonate (1d).**

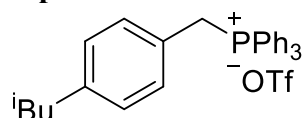

$^1\text{H}$  NMR (400 MHz,  $\text{DMSO-}d_6$ )  $\delta$  7.93 – 7.89 (m, 3H), 7.76 – 7.71 (m, 6H), 7.67 – 7.62 (m, 6H), 7.02 (d,  $J = 7.6$  Hz, 2H), 6.88 – 6.86 (m, 2H), 5.09 (d,  $J = 15.2$  Hz, 2H), 2.39 (d,  $J = 6.8$  Hz, 2H), 1.80 – 1.74 (m, 1H), 0.82 (d,  $J = 6.4$  Hz, 6H) ppm.  $^{13}\text{C}$  NMR (100 MHz,  $\text{DMSO-}d_6$ )  $\delta$  142.4 (d,  $J = 4.1$  Hz), 136.0 (d,  $J = 2.6$  Hz), 134.9 (d,  $J = 9.7$  Hz), 131.5 (d,  $J = 5.5$  Hz), 131.0 (d,  $J = 12.4$  Hz), 130.3 (d,  $J = 3.1$  Hz), 125.9 (d,  $J = 8.4$  Hz), 121.6 (q,  $J = 320.3$  Hz), 118.8 (d,  $J = 84.8$  Hz), 44.9, 30.4, 28.7 (d,  $J = 46.2$  Hz), 22.9 ppm.  $^{31}\text{P}$  NMR (162 MHz,  $\text{DMSO-}d_6$ )  $\delta$  23.0 ppm.  $^{19}\text{F}$  NMR (376 MHz,  $\text{DMSO-}d_6$ )  $\delta$  -77.7 ppm. HRMS (ESI)  $m/z$ :  $[\text{M-OTf}]^+$  Calcd for  $\text{C}_{29}\text{H}_{30}\text{P}$  409.2080; Found 409.2078.

**(4-methoxybenzyl)triphenylphosphonium trifluoromethanesulfonate (1e).**

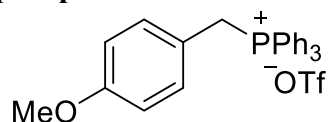

$^1\text{H}$  NMR (400 MHz,  $\text{DMSO-}d_6$ )  $\delta$  7.92 – 7.88 (m, 3H), 7.77 – 7.72 (m, 6H), 7.68 – 7.63



(m, 6H), 6.90 – 6.87 (m, 2H), 6.79 (d,  $J = 8.8$  Hz, 2H), 5.05 (d,  $J = 14.8$  Hz, 2H), 3.69 (s, 3H).  $^{13}\text{C}$  NMR (100 MHz, DMSO- $d_6$ )  $\delta$  159.3 (d,  $J = 3.6$  Hz), 135.2 (d,  $J = 2.7$  Hz), 134.1 (d,  $J = 9.8$  Hz), 132.1 (d,  $J = 5.5$  Hz), 130.2 (d,  $J = 12.3$  Hz), 120.8 (q,  $J = 320.5$  Hz), 119.1 (d,  $J = 2.9$  Hz), 118.0 (d,  $J = 84.8$  Hz), 114.4 (d,  $J = 2.9$  Hz), 55.2, 27.6 (d,  $J = 46.4$  Hz).  $^{31}\text{P}$  NMR (162 MHz, DMSO- $d_6$ )  $\delta$  22.3 ppm.  $^{19}\text{F}$  NMR (376 MHz, DMSO- $d_6$ )  $\delta$  -77.7 ppm. HRMS (ESI)  $m/z$ :  $[\text{M-OTf}]^+$  Calcd for  $\text{C}_{26}\text{H}_{24}\text{OP}$  383.1559; Found 383.1559.

**(4-fluorobenzyl)triphenylphosphonium trifluoromethanesulfonate (1f).**

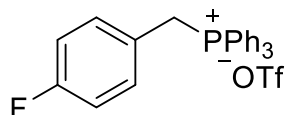

$^1\text{H}$  NMR (400 MHz, DMSO- $d_6$ )  $\delta$  7.93 – 7.90 (m, 3H), 7.78 – 7.74 (m, 6H), 7.70 – 7.65 (m, 6H), 7.12 – 7.08 (m, 2H), 7.03 – 6.97 (m, 2H), 5.14 (d,  $J = 15.6$  Hz, 2H) ppm.  $^{13}\text{C}$  NMR (100 MHz, DMSO- $d_6$ )  $\delta$  161.9 (d,  $J = 248.4$  Hz), 135.1 (d,  $J = 2.8$  Hz), 134.0 (d,  $J = 9.7$  Hz), 132.8 (dd,  $J = 8.3, 5.5$  Hz), 130.1 (d,  $J = 12.3$  Hz), 124.0 (dd,  $J = 8.6, 2.9$  Hz), 120.7 (q, 320.2 Hz), 117.6 (d,  $J = 85.1$  Hz), 115.8 (d,  $J = 21.6, 3.0$  Hz), 27.6, 27.1 ppm.  $^{31}\text{P}$  NMR (162 MHz, DMSO- $d_6$ )  $\delta$  23.1 ppm.  $^{19}\text{F}$  NMR (376 MHz, DMSO- $d_6$ )  $\delta$  -77.7, -113.1 ppm. HRMS (ESI)  $m/z$ :  $[\text{M-OTf}]^+$  Calcd for  $\text{C}_{25}\text{H}_{21}\text{FP}$  371.1359; Found 371.1356.

**(4-chlorobenzyl)triphenylphosphonium trifluoromethanesulfonate (1g).**

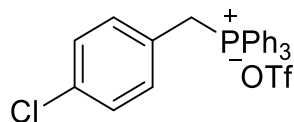

$^1\text{H}$  NMR (400 MHz, DMSO- $d_6$ )  $\delta$  7.93 – 7.90 (m, 3H), 7.77 – 7.68 (m, 12H), 7.32 (d,  $J = 8.0$  Hz, 2H), 7.00 (d,  $J = 6.8$  Hz, 2H), 5.18 (d,  $J = 16.0$  Hz, 2H) ppm.  $^{13}\text{C}$  NMR (100 MHz, DMSO- $d_6$ )  $\delta$  135.2 (d,  $J = 2.7$  Hz), 134.0 (d,  $J = 9.8$  Hz), 133.3 (d,  $J = 4.5$  Hz), 132.5 (d,  $J = 5.6$  Hz), 130.1 (d,  $J = 12.4$  Hz), 128.8 (d,  $J = 3.0$  Hz), 126.9 (d,  $J = 8.6$  Hz), 120.7 (q,  $J = 320.4$  Hz), 117.5 (d,  $J = 85.0$  Hz), 27.5 (d,  $J = 47.0$  Hz) ppm.  $^{31}\text{P}$  NMR (162 MHz, DMSO- $d_6$ )  $\delta$  23.0 ppm.  $^{19}\text{F}$  NMR (376 MHz, DMSO- $d_6$ )  $\delta$  -77.7 ppm. HRMS (ESI)  $m/z$ :  $[\text{M-OTf}]^+$  Calcd for  $\text{C}_{25}\text{H}_{21}\text{ClP}$  387.1064; Found 387.1062.

**(4-bromobenzyl)triphenylphosphonium trifluoromethanesulfonate (1h).**

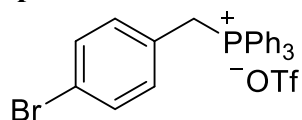

$^1\text{H}$  NMR (400 MHz, DMSO- $d_6$ )  $\delta$  7.92 – 7.90 (m, 3H), 7.76 – 7.70 (m, 12H), 7.46 (d,  $J = 6.4$  Hz, 2H), 6.91 (d,  $J = 6.4$  Hz, 2H), 5.17 (d,  $J = 16.0$  Hz, 2H) ppm.  $^{13}\text{C}$  NMR (100 MHz, DMSO- $d_6$ )  $\delta$  135.2 (d,  $J = 2.7$  Hz), 134.0 (d,  $J = 9.7$  Hz), 132.87 (d,  $J = 5.4$  Hz), 131.7 (d,  $J = 2.9$  Hz), 130.1 (d,  $J = 12.3$  Hz), 127.5 (d,  $J = 8.6$  Hz), 121.8 (d,  $J = 4.7$  Hz), 117.6 (d,  $J = 85.0$  Hz), 27.5 (d,  $J = 46.6$  Hz) ppm.  $^{31}\text{P}$  NMR (162 MHz, DMSO- $d_6$ )  $\delta$  22.9 ppm.  $^{19}\text{F}$  NMR (376 MHz, DMSO- $d_6$ )  $\delta$  -77.7 ppm. HRMS (ESI)  $m/z$ :  $[\text{M-}$

OTf]<sup>+</sup> Calcd for C<sub>25</sub>H<sub>21</sub>BrP 431.0559; Found 431.0559.

**triphenyl(4-(trifluoromethyl)benzyl)phosphonium trifluoromethanesulfonate (1i).**

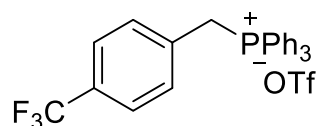

<sup>1</sup>H NMR (400 MHz, DMSO-*d*<sub>6</sub>) δ 7.92 – 7.91 (m, 3H), 7.76 – 7.63 (m, 14H), 7.20 – 7.18 (m, 2H), 5.29 (d, *J* = 16.0 Hz, 2H). <sup>13</sup>C NMR (100 MHz, CDCl<sub>3</sub>) δ 135.3 (d, *J* = 3.0 Hz), 134.1 (d, *J* = 9.6 Hz), 131.7 (d, *J* = 5.3 Hz), 131.6 (d, *J* = 7.9 Hz), 130.7 (d, *J* = 3.8 Hz), 130.3 (d, *J* = 12.5 Hz), 125.6 (q, *J* = 3.6 Hz), 123.7 (q, *J* = 270.2 Hz), 120.8 (q, *J* = 318.7 Hz), 117.0 (d, *J* = 85.8 Hz), 29.6 (d, *J* = 48.0 Hz) ppm. <sup>31</sup>P NMR (162 MHz, DMSO-*d*<sub>6</sub>) δ 23.5 ppm. <sup>19</sup>F NMR (376 MHz, DMSO-*d*<sub>6</sub>) δ -61.1, -77.8 ppm. HRMS (ESI) *m/z*: [M-OTf]<sup>+</sup> Calcd for C<sub>26</sub>H<sub>21</sub>F<sub>3</sub>P 421.1327; Found 421.1326.

**(4-methylbenzyl)triphenylphosphonium trifluoromethanesulfonate (1j).**

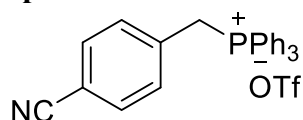

<sup>1</sup>H NMR (400 MHz, DMSO-*d*<sub>6</sub>) δ 7.94 – 7.90 (m, 3H), 7.79 – 7.66 (m, 14H), 7.16 – 7.14 (m, 2H), 5.28 (d, *J* = 15.6 Hz, 2H). <sup>13</sup>C NMR (100 MHz, DMSO-*d*<sub>6</sub>) δ 135.3 (d, *J* = 2.9 Hz), 134.0 (d, *J* = 9.8 Hz), 132.6 (d, *J* = 4.2 Hz), 131.7 (d, *J* = 4.5 Hz), 130.2 (d, *J* = 12.5 Hz), 120.7 (d, *J* = 320.5 Hz), 118.2 (d, *J* = 7.8 Hz), 117.3 (d, *J* = 85.3 Hz), 111.3 (d, *J* = 4.1 Hz), 28.2 (d, *J* = 46.8 Hz) ppm. <sup>31</sup>P NMR (162 MHz, DMSO-*d*<sub>6</sub>) δ 23.5 ppm. <sup>19</sup>F NMR (376 MHz, DMSO-*d*<sub>6</sub>) δ -77.7 ppm. HRMS (ESI) *m/z*: [M-OTf]<sup>+</sup> Calcd for C<sub>26</sub>H<sub>21</sub>NP 378.1406; Found 378.1402.

**(4-(methoxycarbonyl)benzyl)triphenylphosphonium trifluoromethanesulfonate (1k).**

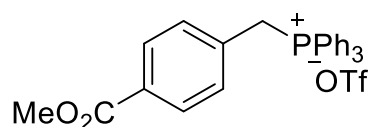

<sup>1</sup>H NMR (400 MHz, DMSO-*d*<sub>6</sub>) δ 7.95 – 7.91 (m, 3H), 7.83 – 7.67 (m, 14H), 7.13 (d, *J* = 6.4 Hz, 2H), 5.27 (d, *J* = 16.0 Hz, 2H), 3.82 (s, 3H) ppm. <sup>13</sup>C NMR (100 MHz, DMSO-*d*<sub>6</sub>) δ 165.6 (d, *J* = 1.0 Hz), 135.2 (d, *J* = 2.6 Hz), 134.0 (d, *J* = 9.9 Hz), 133.6 (d, *J* = 8.5 Hz), 131.2 (d, *J* = 5.4 Hz), 130.2 (d, *J* = 12.5 Hz), 129.4 (d, *J* = 2.5 Hz), 120.8 (q, *J* = 320.2 Hz), 117.4 (d, *J* = 85.3 Hz), 52.2, 28.2 (d, *J* = 46.6 Hz) ppm. <sup>31</sup>P NMR (162 MHz, DMSO-*d*<sub>6</sub>) δ 23.3 ppm. <sup>19</sup>F NMR (376 MHz, DMSO-*d*<sub>6</sub>) δ -77.7 ppm. HRMS (ESI) *m/z*: [M-OTf]<sup>+</sup> Calcd for C<sub>27</sub>H<sub>24</sub>O<sub>2</sub>P 411.1508; Found 411.1509.

**(2-methylbenzyl)triphenylphosphonium trifluoromethanesulfonate (1l)**

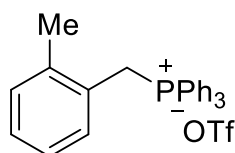

$^1\text{H}$  NMR (400 MHz, DMSO- $d_6$ )  $\delta$  7.94 – 7.90 (m, 3H), 7.76 – 7.71 (m, 6H), 7.64 – 7.59 (m, 6H), 7.25 – 7.21 (m, 1H), 7.11 (d,  $J$  = 7.6 Hz, 1H), 7.06 – 7.03 (m, 1H), 6.94 (d,  $J$  = 8.4 Hz, 1H), 5.00 (d,  $J$  = 14.8 Hz, 2H), 1.64 (s, 3H) ppm.  $^{13}\text{C}$  NMR (100 MHz, DMSO- $d_6$ )  $\delta$  138.8 (d,  $J$  = 5.9 Hz), 135.4 (d,  $J$  = 2.8 Hz), 134.1 (d,  $J$  = 9.8 Hz), 131.1 (d,  $J$  = 3 Hz), 130.9 (d,  $J$  = 5.0 Hz), 130.3 (d,  $J$  = 12.3 Hz), 128.8 (d,  $J$  = 3.7 Hz), 126.4 (d,  $J$  = 3.1 Hz), 126.1 (d,  $J$  = 8.5 Hz), 120.8 (q,  $J$  = 318.6 Hz), 117.6 (d,  $J$  = 84.6 Hz), 26.1 (d,  $J$  = 47.0 Hz), 18.9 ppm.  $^{31}\text{P}$  NMR (162 MHz, DMSO- $d_6$ )  $\delta$  22.3 ppm.  $^{19}\text{F}$  NMR (376 MHz, DMSO- $d_6$ )  $\delta$  -77.7 ppm. HRMS (ESI)  $m/z$ :  $[\text{M-OTf}]^+$  Calcd for  $\text{C}_{26}\text{H}_{24}\text{P}$  367.1610; Found 367.1606.

**(2-ethylbenzyl)triphenylphosphonium trifluoromethanesulfonate (1m).**

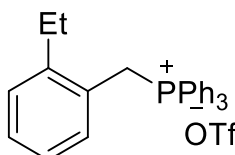

$^1\text{H}$  NMR (400 MHz, DMSO- $d_6$ )  $\delta$  7.94 – 7.90 (m, 3H), 7.76 – 7.71 (m, 6H), 7.63 – 7.58 (m, 6H), 7.31 – 7.28 (m, 1H), 7.18 (d,  $J$  = 7.6 Hz, 1H), 7.06 – 7.02 (m, 1H), 6.92 (d,  $J$  = 8.0 Hz, 1H), 4.99 (d,  $J$  = 15.2 Hz, 2H), 1.95 (q,  $J$  = 7.6 Hz, 2H), 0.84 (t,  $J$  = 7.6 Hz, 3H) ppm.  $^{13}\text{C}$  NMR (100 MHz, DMSO- $d_6$ )  $\delta$  144.2 (d,  $J$  = 6.2 Hz), 135.3 (d,  $J$  = 2.8 Hz), 134.1 (d,  $J$  = 9.7 Hz), 131.0 (d,  $J$  = 4.8 Hz), 130.2 (d,  $J$  = 12.3 Hz), 129.0 (d,  $J$  = 3.8 Hz), 128.9 (d,  $J$  = 2.9 Hz), 126.2 (d,  $J$  = 3.4 Hz), 125.3 (d,  $J$  = 8.6 Hz), 120.7 (q,  $J$  = 320.2 Hz), 117.6 (d,  $J$  = 84.8 Hz), 25.6 (d,  $J$  = 46.8 Hz), 24.4, 14.3 ppm.  $^{31}\text{P}$  NMR (162 MHz, DMSO- $d_6$ )  $\delta$  22.5 ppm.  $^{19}\text{F}$  NMR (376 MHz, DMSO- $d_6$ )  $\delta$  -77.8 ppm. HRMS (ESI)  $m/z$ :  $[\text{M-OTf}]^+$  Calcd for  $\text{C}_{27}\text{H}_{26}\text{P}$  381.1767; Found 381.1766.

**(3-methoxybenzyl)triphenylphosphonium trifluoromethanesulfonate (1n)**

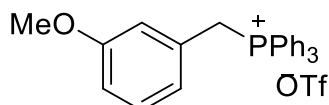

$^1\text{H}$  NMR (400 MHz, DMSO- $d_6$ )  $\delta$  7.93 – 7.90 (m, 3H), 7.78 – 7.73 (m, 6H), 7.71 – 7.66 (m, 6H), 7.19 – 7.15 (m, 1H), 6.87 (d,  $J$  = 8.0 Hz, 1H), 6.61 (d,  $J$  = 7.6 Hz, 1H), 6.48 (d,  $J$  = 1.6 Hz, 1H), 5.10 (d,  $J$  = 15.6 Hz, 2H), 3.50 (s, 3H) ppm.  $^{13}\text{C}$  NMR (100 MHz, DMSO- $d_6$ )  $\delta$  159.3 (d,  $J$  = 3.4 Hz), 135.2 (d,  $J$  = 2.7 Hz), 134.1 (d,  $J$  = 9.7 Hz), 130.2 (d,  $J$  = 12.3 Hz), 130.0 (d,  $J$  = 3.0 Hz), 129.3 (d,  $J$  = 8.5 Hz), 123.1 (d,  $J$  = 5.7 Hz), 117.9 (d,  $J$  = 85.2 Hz), 120.8 (q,  $J$  = 320.3 Hz), 116.3 (d,  $J$  = 5.4 Hz), 114.4 (d,  $J$  = 3.6 Hz), 55.0, 28.4 (d,  $J$  = 46.8 Hz) ppm.  $^{31}\text{P}$  NMR (162 MHz, DMSO- $d_6$ )  $\delta$  23.1 ppm.  $^{19}\text{F}$  NMR (376 MHz, DMSO- $d_6$ )  $\delta$  -77.7 ppm. HRMS (ESI)  $m/z$ :  $[\text{M-OTf}]^+$  Calcd for  $\text{C}_{26}\text{H}_{24}\text{OP}$  383.1559; Found 383.1559.

**(3-phenoxybenzyl)triphenylphosphonium trifluoromethanesulfonate (1o).**

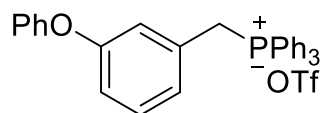

$^1\text{H}$  NMR (400 MHz,  $\text{DMSO-}d_6$ )  $\delta$  7.94 – 7.90 (m, 3H), 7.75 – 7.65 (m, 12H), 7.36 – 7.32 (m, 2H), 7.29 – 7.25 (m, 1H), 7.17 – 7.13 (m, 1H), 7.00 (d,  $J = 8.0$  Hz, 1H), 6.83 – 6.77 (m, 3H), 6.58 (s, 1H), 5.20 (d,  $J = 16.0$  Hz, 2H) ppm.  $^{13}\text{C}$  NMR (100 MHz,  $\text{DMSO-}d_6$ )  $\delta$  156.9 (d,  $J = 3.3$  Hz), 155.7, 135.1 (d,  $J = 2.7$  Hz), 134.0 (d,  $J = 9.7$  Hz), 130.4 (d,  $J = 3.2$  Hz), 130.11 (d,  $J = 12.3$  Hz), 130.08, 129.9 (d,  $J = 8.7$  Hz), 125.5 (d,  $J = 5.5$  Hz), 123.8, 120.2 (d,  $J = 5.6$  Hz), 118.8, 118.6 (d,  $J = 3.5$  Hz), 117.6 (d,  $J = 85.2$  Hz), 28.0 (d,  $J = 46.6$  Hz) ppm.  $^{31}\text{P}$  NMR (162 MHz,  $\text{DMSO-}d_6$ )  $\delta$  23.3 ppm.  $^{19}\text{F}$  NMR (376 MHz,  $\text{DMSO-}d_6$ )  $\delta$  -77.7 ppm. HRMS (ESI)  $m/z$ :  $[\text{M-OTf}]^+$  Calcd for  $\text{C}_{31}\text{H}_{26}\text{OP}$  445.1716 Found 445.1717.

**triphenyl(3-(trifluoromethoxy)benzyl)phosphonium trifluoromethanesulfonate (1p).**

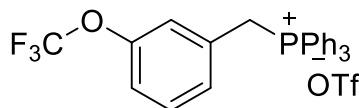

$^1\text{H}$  NMR (400 MHz,  $\text{DMSO-}d_6$ )  $\delta$  7.94 – 7.90 (m, 3H), 7.78 – 7.66 (m, 12H), 7.42 – 7.38 (m, 1H), 7.31 (d,  $J = 8.4$  Hz, 1H), 7.06 (d,  $J = 7.6$  Hz, 1H), 6.94 (s, 1H), 5.28 (d,  $J = 15.6$  Hz, 2H) ppm.  $^{13}\text{C}$  NMR (100 MHz,  $\text{DMSO-}d_6$ )  $\delta$  149.1, 136.1 (d,  $J = 2.8$  Hz), 134.9 (d,  $J = 10.0$  Hz), 131.7 (q,  $J = 3.2$  Hz), 131.6, 131.0 (d,  $J = 12.4$  Hz), 130.7 (d,  $J = 5.3$  Hz), 124.1 (d,  $J = 5.4$  Hz), 121.9 (d,  $J = 3.2$  Hz), 120.7 (q,  $J = 255.4$  Hz), 118.3 (d,  $J = 85.3$  Hz), 28.7 (d,  $J = 47.1$  Hz) ppm.  $^{31}\text{P}$  NMR (162 MHz,  $\text{DMSO-}d_6$ )  $\delta$  23.5 ppm.  $^{19}\text{F}$  NMR (376 MHz,  $\text{DMSO-}d_6$ )  $\delta$  -56.8, -77.8 ppm. HRMS (ESI)  $m/z$ :  $[\text{M-OTf}]^+$  Calcd for  $\text{C}_{26}\text{H}_{21}\text{F}_3\text{OP}$  437.1277; Found 437.1277.

**methylbenzyl)triphenylphosphonium trifluoromethanesulfonate (1q).**

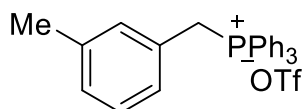

$^1\text{H}$  NMR (400 MHz,  $\text{DMSO-}d_6$ )  $\delta$  7.93 – 7.90 (m, 3H), 7.78 – 7.73 (m, 6H), 7.69 – 7.64 (m, 6H), 7.13 (d,  $J = 6.0$  Hz, 2H), 6.81 (d,  $J = 6.4$  Hz, 1H), 6.65 (s, 1H), 5.08 (d,  $J = 15.6$  Hz, 2H), 2.09 (s, 3H) ppm.  $^{13}\text{C}$  NMR (100 MHz,  $\text{DMSO-}d_6$ )  $\delta$  138.8 (d,  $J = 3.2$  Hz), 136.0 (d,  $J = 2.7$  Hz), 134.9 (d,  $J = 9.9$  Hz), 132.5 (d,  $J = 5.5$  Hz), 131.0 (d,  $J = 12.4$  Hz), 129.8 (d,  $J = 3.8$  Hz), 129.6 (d,  $J = 3.0$  Hz), 128.8 (d,  $J = 5.6$  Hz), 128.5 (d,  $J = 8.5$  Hz), 121.6 (d,  $J = 320.5$  Hz), 118.7 (d,  $J = 8.5$  Hz), 28.1 (d,  $J = 46.4$  Hz), 20.7 ppm.  $^{31}\text{P}$  NMR (162 MHz,  $\text{DMSO-}d_6$ )  $\delta$  23.0 ppm.  $^{19}\text{F}$  NMR (376 MHz,  $\text{DMSO-}d_6$ )  $\delta$  -77.7 ppm. HRMS (ESI)  $m/z$ :  $[\text{M-OTf}]^+$  Calcd for  $\text{C}_{26}\text{H}_{24}\text{P}$  367.1610; Found 367.1606.

**(3,5-dimethoxybenzyl)triphenylphosphonium trifluoromethanesulfonate (1r).**

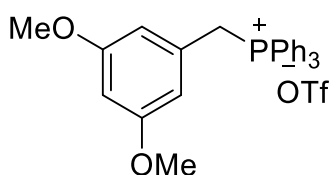

$^1\text{H}$  NMR (400 MHz,  $\text{DMSO-}d_6$ )  $\delta$  7.93 – 7.89 (m, 3H), 7.78 – 7.73 (m, 6H), 7.69 – 7.65 (m, 6H), 6.42 (s, 1H), 6.12 (s, 2H), 5.02 (d,  $J = 15.6$  Hz, 2H), 3.50 (s, 9H) ppm.  $^{13}\text{C}$  NMR (100 MHz,  $\text{DMSO-}d_6$ )  $\delta$  160.5 (d,  $J = 3.1$  Hz), 135.2 (d,  $J = 2.7$  Hz), 134.1 (d,  $J = 9.7$  Hz), 130.2 (d,  $J = 12.3$  Hz), 129.9 (d,  $J = 8.4$  Hz), 120.8 (q,  $J = 320.4$  Hz), 117.8 (d,  $J = 85.2$  Hz), 109.0 (d,  $J = 5.4$  Hz), 100.3 (d,  $J = 3.3$  Hz), 55.2, 28.6 (d,  $J = 46.1$  Hz) ppm.  $^{31}\text{P}$  NMR (162 MHz,  $\text{DMSO-}d_6$ )  $\delta$  23.0 ppm.  $^{19}\text{F}$  NMR (376 MHz,  $\text{DMSO-}d_6$ )  $\delta$  -77.8 ppm. HRMS (ESI)  $m/z$ :  $[\text{M-OTf}]^+$  Calcd for  $\text{C}_{27}\text{H}_{26}\text{O}_2\text{P}$  413.1665 Found 413.1664.

**(naphthalen-1-ylmethyl)triphenylphosphonium trifluoromethanesulfonate (1s).**

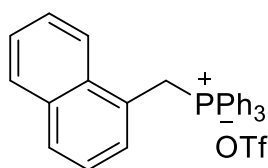

$^1\text{H}$  NMR (400 MHz,  $\text{DMSO-}d_6$ )  $\delta$  7.91 – 7.81 (m, 5H), 7.69 – 7.60 (m, 13H), 7.41 – 7.34 (m, 2H), 7.31 – 7.29 (m, 1H), 7.13 – 7.09 (m, 1H), 5.58 (d,  $J = 15.6$  Hz, 2H) ppm.  $^{13}\text{C}$  NMR (100 MHz,  $\text{DMSO-}d_6$ )  $\delta$  135.0 (d,  $J = 2.8$  Hz), 134.0 (d,  $J = 9.9$  Hz), 133.2 (d,  $J = 2.7$  Hz), 132.0 (d,  $J = 4.6$  Hz), 129.9 (d,  $J = 12.4$  Hz), 129.7 (d,  $J = 6.8$  Hz), 129.2 (d,  $J = 4.2$  Hz), 128.4, 125.9, 125.1 (d,  $J = 3.9$  Hz), 123.9 (d,  $J = 9.0$  Hz), 123.7, 120.6 (d,  $J = 320.4$  Hz), 117.6 (d,  $J = 84.6$  Hz), 25.2 (d,  $J = 47.3$  Hz) ppm.  $^{31}\text{P}$  NMR (162 MHz,  $\text{DMSO-}d_6$ )  $\delta$  22.8 ppm.  $^{19}\text{F}$  NMR (376 MHz,  $\text{DMSO-}d_6$ )  $\delta$  -77.7 ppm. HRMS (ESI)  $m/z$ :  $[\text{M-OTf}]^+$  Calcd for  $\text{C}_{29}\text{H}_{24}\text{P}$  403.1610 Found 403.1610.

**(naphthalen-2-ylmethyl)triphenylphosphonium trifluoromethanesulfonate (1t).**

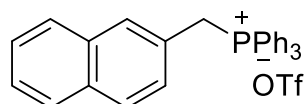

$^1\text{H}$  NMR (400 MHz,  $\text{DMSO-}d_6$ )  $\delta$  7.93 – 7.86 (m, 4H), 7.79 – 7.68 (m, 13H), 7.62 – 7.59 (m, 1H), 7.53 – 7.47 (m, 3H), 7.06 (d,  $J = 8.4$  Hz, 1H), 5.32 (d,  $J = 15.6$  Hz, 2H) ppm.  $^{13}\text{C}$  NMR (100 MHz,  $\text{DMSO-}d_6$ )  $\delta$  135.1 (d,  $J = 2.8$  Hz), 134.0 (d,  $J = 9.9$  Hz), 132.5 (d,  $J = 3.1$  Hz), 132.2 (d,  $J = 2.6$  Hz), 130.3 (d,  $J = 7.3$  Hz), 130.1 (d,  $J = 12.3$  Hz), 128.3 (d,  $J = 2.3$  Hz), 128.0 (d,  $J = 4.2$  Hz), 127.6, 127.4, 126.8 (d,  $J = 8.9$  Hz), 125.4 (d,  $J = 9.0$  Hz), 120.8 (q,  $J = 320.3$  Hz), 117.8 (d,  $J = 85.1$  Hz), 28.4 (d,  $J = 46.4$  Hz) ppm.  $^{31}\text{P}$  NMR (162 MHz,  $\text{DMSO-}d_6$ )  $\delta$  22.9 ppm.  $^{19}\text{F}$  NMR (376 MHz,  $\text{DMSO-}d_6$ )  $\delta$  -77.7 ppm. HRMS (ESI)  $m/z$ :  $[\text{M-OTf}]^+$  Calcd for  $\text{C}_{29}\text{H}_{24}\text{P}$  403.1610 Found 403.1610.

**triphenyl(1-phenylethyl)phosphonium trifluoromethanesulfonate (1u).**

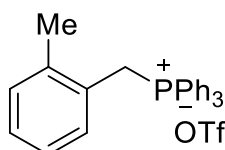

$^1\text{H}$  NMR (400 MHz,  $\text{DMSO-}d_6$ )  $\delta$  7.93 – 7.89 (m, 3H), 7.70 – 7.72 (m, 6H), 7.71 – 7.64

(m, 6H), 7.35 – 7.34 (m, 1H), 7.28 (t,  $J = 7.6$  Hz, 2H), 6.96 – 6.94 (m, 2H), 5.65 – 5.56 (m, 1H), 1.74 (dd,  $J = 18.8, 7.2$  Hz, 3H).  $^{13}\text{C}$  NMR (100 MHz, DMSO- $d_6$ )  $\delta$  135.2 (d,  $J = 2.7$  Hz), 134.3 (d,  $J = 9.1$  Hz), 133.7 (d,  $J = 5.2$  Hz), 130.3 (d,  $J = 12.0$  Hz), 129.7 (d,  $J = 5.8$  Hz), 129.05, 128.98 (d,  $J = 2.1$  Hz), 120.6 (q,  $J = 320.6$  Hz), 117.2 (d,  $J = 82.1$  Hz), 34.2 (d,  $J = 43.6$  Hz), 16.8 ppm.  $^{31}\text{P}$  NMR (162 MHz, DMSO- $d_6$ )  $\delta$  26.3 ppm.  $^{19}\text{F}$  NMR (376 MHz, DMSO- $d_6$ )  $\delta$  -77.7 ppm. [M-OTf] $^+$  Calcd for C<sub>26</sub>H<sub>24</sub>P 367.1610; Found 367.1606.

**triphenyl(1-(*m*-tolyl)ethyl)phosphonium trifluoromethanesulfonate (1v).**

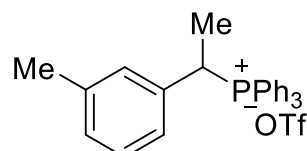

$^1\text{H}$  NMR (400 MHz, DMSO- $d_6$ )  $\delta$  7.95 – 7.91 (m, 3H), 7.79 – 7.68 (m, 12H), 7.22 – 7.18 (m, 2H), 6.87 (d,  $J = 6.8$  Hz, 1H), 6.58 (s, 1H), 5.61 – 5.52 (m, 1H), 2.12 (s, 3H), 1.73 (dd,  $J = 18.8, 7.2$  Hz, 3H) ppm.  $^{13}\text{C}$  NMR (100 MHz, DMSO- $d_6$ )  $\delta$  138.1 (d,  $J = 2.4$  Hz), 135.0 (d,  $J = 2.8$  Hz), 134.3 (d,  $J = 9.1$  Hz), 134.0 (d,  $J = 9.8$  Hz), 133.3 (d,  $J = 5.2$  Hz), 130.3 (d,  $J = 5.6$  Hz), 130.1 (d,  $J = 12$  Hz), 129.4 (d,  $J = 3.1$  Hz), 128.7 (d,  $J = 2.1$  Hz), 126.8 (d,  $J = 5.9$  Hz), 120.8 (d,  $J = 320.5$  Hz), 117.1 (d, 82.0 Hz), 34.1 (d,  $J = 43.4$  Hz), 20.8, 16.6 ppm.  $^{31}\text{P}$  NMR (162 MHz, DMSO- $d_6$ )  $\delta$  26.3 ppm.  $^{19}\text{F}$  NMR (376 MHz, DMSO- $d_6$ )  $\delta$  -77.7 ppm. [M-OTf] $^+$  Calcd for C<sub>27</sub>H<sub>26</sub>P 381.1767; Found 381.1765.

**(1-(3-phenoxyphenyl)ethyl)triphenylphosphonium trifluoromethanesulfonate (1w).**

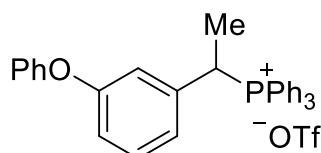

$^1\text{H}$  NMR (400 MHz, DMSO- $d_6$ )  $\delta$  7.94 – 7.90 (m, 3H), 7.77 – 7.72 (m, 6H), 7.70 – 7.65 (m, 6H), 7.41 – 7.30 (m, 3H), 7.20 – 7.16 (m, 1H), 7.05 (d,  $J = 8.0$  Hz, 1H), 6.89 (d,  $J = 7.6$  Hz, 2H), 6.70 (d,  $J = 7.6$  Hz, 1H), 6.58 (d,  $J = 1.6$  Hz, 1H), 5.62 – 5.52 (m, 1H), 1.71 (dd,  $J = 18.8, 7.2$  Hz, 3H) ppm.  $^{13}\text{C}$  NMR (100 MHz, DMSO- $d_6$ )  $\delta$  157.1 (d,  $J = 2.4$  Hz), 155.7, 135.7 (d,  $J = 5.1$  Hz), 135.1 (d,  $J = 2.7$  Hz), 134.2 (d,  $J = 9.2$  Hz), 130.7 (d,  $J = 2.0$  Hz), 130.3, 130.2 (d,  $J = 1.0$  Hz), 124.2 (d,  $J = 5.6$  Hz), 124.0, 119.25 (d,  $J = 5.9$  Hz), 119.15 (d,  $J = 2.9$  Hz), 119.0, 116.9 (d,  $J = 82.3$  Hz), 34.20 (d,  $J = 44.3$  Hz), 16.8 ppm.  $^{31}\text{P}$  NMR (162 MHz, DMSO- $d_6$ )  $\delta$  26.2 ppm.  $^{19}\text{F}$  NMR (376 MHz, DMSO- $d_6$ )  $\delta$  -77.7 ppm. [M-OTf] $^+$  Calcd for C<sub>32</sub>H<sub>28</sub>OP 459.1872; Found 459.1872.

**triphenyl(1-(*o*-tolyl)ethyl)phosphonium trifluoromethanesulfonate (1x)**

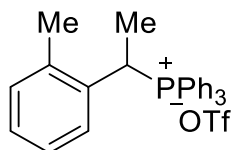

$^1\text{H}$  NMR (400 MHz, DMSO- $d_6$ )  $\delta$  7.97 – 7.94 (m, 3H), 7.77 – 7.72 (m, 6H), 7.52 – 7.47

(m, 6H), 7.33–7.30 (m, 1H), 7.20 (d,  $J = 7.6$  Hz, 1H), 7.13–7.09 (m, 1H), 6.65 (d,  $J = 8.0$  Hz, 1H), 5.16–5.07 (m, 1H), 1.89–1.81 (m, 6H) ppm.  $^{13}\text{C}$  NMR (100 MHz, DMSO- $d_6$ )  $\delta$  138.4 (d,  $J = 7.3$  Hz), 135.5 (d,  $J = 2.7$  Hz), 134.5 (d,  $J = 9.1$  Hz), 131.9 (d,  $J = 5.2$  Hz), 131.3, 130.4 (d,  $J = 11.9$  Hz), 129.2 (d,  $J = 2.9$  Hz), 128.2 (d,  $J = 4.5$  Hz), 126.8 (d,  $J = 2.7$  Hz), 120.9 (q,  $J = 320.3$  Hz), 116.7 (d,  $J = 81.9$  Hz), 32.6 (d,  $J = 44.6$  Hz), 19.1, 17.4 ppm.  $^{31}\text{P}$  NMR (162 MHz, DMSO- $d_6$ )  $\delta$  24.9 ppm.  $^{19}\text{F}$  NMR (376 MHz, DMSO- $d_6$ )  $\delta$  -77.7 ppm.  $[\text{M-OTf}]^+$  Calcd for  $\text{C}_{27}\text{H}_{26}\text{P}$  381.1767; Found 381.1765.

**triphenyl(1-(p-tolyl)ethyl)phosphonium trifluoromethanesulfonate (1y).**

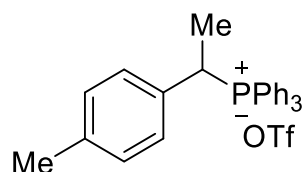

$^1\text{H}$  NMR (400 MHz, DMSO- $d_6$ )  $\delta$  7.92–7.89 (m, 3H), 7.78–7.66 (m, 12H), 7.08 (d,  $J = 8.0$  Hz, 2H), 6.84–6.82 (m, 2H), 5.56–5.52 (m, 1H), 2.26 (d,  $J = 1.6$  Hz, 3H), 1.70 (dd,  $J = 18.8, 7.2$  Hz, 3H).  $^{13}\text{C}$  NMR (100 MHz, DMSO- $d_6$ )  $\delta$  139.0 (d,  $J = 3.3$  Hz), 135.5 (d,  $J = 2.7$  Hz), 134.7 (d,  $J = 9.2$  Hz), 130.9 (d,  $J = 5.3$  Hz), 130.7 (d,  $J = 12.0$  Hz), 130.1 (d,  $J = 5.7$  Hz), 129.9 (d,  $J = 2.3$  Hz), 121.2 (q,  $J = 320.2$  Hz), 117.7 (d,  $J = 82.1$  Hz), 34.3 (d,  $J = 43.4$  Hz), 21.1, 17.3 ppm.  $^{31}\text{P}$  NMR (162 MHz, DMSO- $d_6$ )  $\delta$  26.0 ppm.  $^{19}\text{F}$  NMR (376 MHz, DMSO- $d_6$ )  $\delta$  -77.7 ppm.  $[\text{M-OTf}]^+$  Calcd for  $\text{C}_{27}\text{H}_{26}\text{P}$  381.1767; Found 381.1765.

**triphenyl(thiophen-2-ylmethyl)phosphonium trifluoromethanesulfonate (1a')**

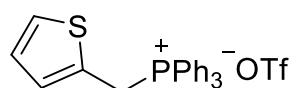

$^1\text{H}$  NMR (400 MHz, DMSO- $d_6$ )  $\delta$  7.87–7.84 (m, 3H), 7.72–7.68 (m, 6H), 7.65–7.60 (m, 7.6 Hz, 6H), 7.46–7.44 (m, 1H), 7.11 (s, 1H), 6.52 (d,  $J = 5.2$  Hz, 1H), 5.20 (d,  $J = 15.2$  Hz, 2H) ppm.  $^{13}\text{C}$  NMR (100 MHz, DMSO- $d_6$ )  $\delta$  135.0 (d,  $J = 2.8$  Hz), 133.8 (d,  $J = 9.7$  Hz), 130.1 (d,  $J = 12.3$  Hz), 128.7 (d,  $J = 3.3$  Hz), 127.4 (d,  $J = 1.2$  Hz), 126.9, 126.8, 118.0 (d,  $J = 85.0$  Hz), 23.5 (d,  $J = 48.3$  Hz) ppm.  $^{19}\text{F}$  NMR (377 MHz, DMSO- $d_6$ )  $\delta$  -77.72 (s).  $^{31}\text{P}$  NMR (162 MHz, DMSO)  $\delta$  21.79 ppm.  $^{19}\text{F}$  NMR (376 MHz, DMSO- $d_6$ )  $\delta$  -77.72 ppm.

**2-phenylacetic acid (2a)<sup>2</sup>.**

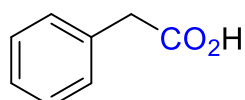

White solid (22.3 mg, 82% yield). Conformed the documental reports.  $^1\text{H}$  NMR (400 MHz,  $\text{CDCl}_3$ )  $\delta$  7.38–7.29 (m, 5H), 3.66 (s, 2H) ppm;  $^{13}\text{C}$  NMR (100 MHz,  $\text{CDCl}_3$ )  $\delta$

178.1, 133.4, 129.5, 128.8, 127.5, 41.2 ppm.

**2-(*p*-tolyl)acetic acid (2b)<sup>3</sup>.**

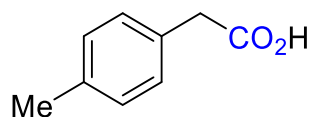

White solid (20.3 mg, 68% yield). Conformed the documental reports. <sup>1</sup>H NMR (400 MHz, CDCl<sub>3</sub>) δ 7.18 (d, *J* = 7.6 Hz, 2H), 7.16 (d, *J* = 8.4 Hz, 2H), 3.62 (s, 2H), 2.34 (s, 3H), 0.09 (s, 3H) ppm; <sup>13</sup>C NMR (100 MHz, CDCl<sub>3</sub>) δ 178.4, 137.2, 130.3, 129.5, 129.37, 40.8, 21.2, 1.2 ppm.

**2-(4-(*tert*-butyl)phenyl)acetic acid (2c)<sup>2</sup>.**

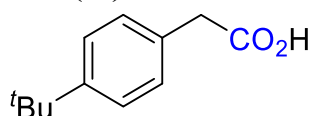

Colorless oil (19.0 mg, 50% yield). Conformed the documental reports. <sup>1</sup>H NMR (400 MHz, CDCl<sub>3</sub>) δ 7.37 (d, *J* = 7.6 Hz, 2H), 7.23 (d, *J* = 8.0 Hz, 2H), 3.63 (s, 2H), 1.32 (s, 9H) ppm; <sup>13</sup>C NMR (100 MHz, CDCl<sub>3</sub>) δ 178.1, 150.4, 130.4, 129.2, 125.8, 40.7, 34.6, 31.5 ppm.

**2-(4-isobutylphenyl)acetic acid (2d)<sup>8</sup>.**

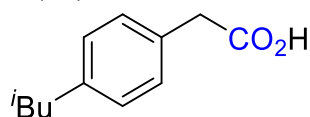

White solid (30.9 mg, 75% yield). Conformed the documental reports. <sup>1</sup>H NMR (400 MHz, CDCl<sub>3</sub>) δ 7.20 (d, *J* = 8.0 Hz, 2H), 7.12 (d, *J* = 8.0 Hz, 2H), 3.62 (s, 2H), 2.46 (d, *J* = 7.2 Hz, 2H), 1.93 – 1.81 (m, 1H), 0.91 (d, *J* = 6.8 Hz, 6H) ppm; <sup>13</sup>C NMR (100 MHz, CDCl<sub>3</sub>) δ 178.2, 141.0, 130.6, 129.5, 129.2, 45.2, 40.8, 30.3, 22.5 ppm.

**2-(4-methoxyphenyl)acetic acid (2e)<sup>2</sup>.**

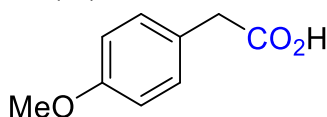

White solid (24.6 mg, 74% yield). Conformed the documental reports. <sup>1</sup>H NMR (400 MHz, CDCl<sub>3</sub>) δ 7.21 (d, *J* = 8.8 Hz, 2H), 6.88 (d, *J* = 8.4 Hz, 2H), 3.80 (s, 3H), 3.59 (s, 2H) ppm; <sup>13</sup>C NMR (100 MHz, CDCl<sub>3</sub>) δ 178.4, 159.0, 130.5, 125.5, 114.2, 55.4, 40.3 ppm.

**2-(4-fluorophenyl)acetic acid (2f)<sup>2</sup>.**

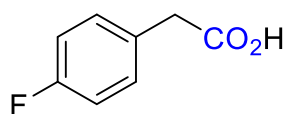

White solid (21.4 mg, 69% yield). Conformed the documental reports. <sup>1</sup>H NMR (400 MHz, CDCl<sub>3</sub>) δ 7.25 (dd, *J* = 7.6, 4.6 Hz, 2H), 7.02 (t, *J* = 8.6 Hz, 2H), 3.63 (s, 2H)



ppm;  $^{13}\text{C}$  NMR (100 MHz,  $\text{CDCl}_3$ )  $\delta$  177.4, 162.3 (d,  $J = 244.5\text{Hz}$ ), 131.1 (d,  $J = 8\text{ Hz}$ ), 129.1 (d,  $J = 3.4\text{ Hz}$ ), 115.7 (d,  $J = 21.3\text{ Hz}$ ), 40.2 ppm.  $^{19}\text{F}$  NMR (376 MHz,  $\text{CDCl}_3$ )  $\delta$  -120.0 ppm.

**2-(4-chlorophenyl)acetic acid (2g)<sup>4</sup>.**

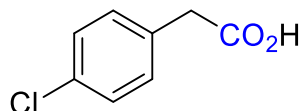

White solid (15.0 mg, 44% yield). Conformed the documental reports.  $^1\text{H}$  NMR (400 MHz,  $\text{CDCl}_3$ )  $\delta$  7.31 (d,  $J = 8.4\text{ Hz}$ , 2H), 7.21 (d,  $J = 8.4\text{ Hz}$ , 2H), 3.62 (s, 2H) ppm;  $^{13}\text{C}$  NMR (100 MHz,  $\text{CDCl}_3$ )  $\delta$  177.6, 133.6, 131.8, 130.9, 129.0, 40.4 ppm.

**2-(4-bromophenyl)acetic acid (2h)<sup>2</sup>.**

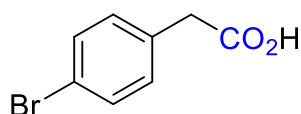

White solid (13.6 mg, 51% yield). Conformed the documental reports.  $^1\text{H}$  NMR (400 MHz,  $\text{CDCl}_3$ )  $\delta$  7.46 (d,  $J = 8.4\text{ Hz}$ , 2H), 7.16 (d,  $J = 8.4\text{ Hz}$ , 2H), 3.60 (s, 2H) ppm;  $^{13}\text{C}$  NMR (100 MHz,  $\text{CDCl}_3$ )  $\delta$  177.3, 132.3, 131.9, 131.2, 121.6, 40.5 ppm.

**2-(4-(trifluoromethyl)phenyl)acetic acid (2i)<sup>3</sup>.**

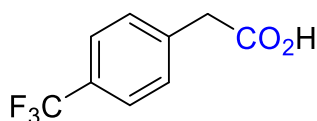

White solid (28.7 mg, 70% yield). Conformed the documental reports.  $^1\text{H}$  NMR (400 MHz,  $\text{CDCl}_3$ )  $\delta$  7.60 (d,  $J = 7.2\text{ Hz}$ , 2H), 7.41 (d,  $J = 7.2\text{ Hz}$ , 2H), 3.72 (s, 2H) ppm;  $^{13}\text{C}$  NMR (100 MHz,  $\text{CDCl}_3$ )  $\delta$  177.82, 137.65, 130.3 (q,  $J = 32.4\text{ Hz}$ ), 126.1 (q,  $J = 3.7\text{ Hz}$ ), 124.6 (q,  $J = 270.4\text{ Hz}$ ), 41.33 ppm.

**2-(4-cyanophenyl)acetic acid (2j)<sup>3</sup>.**

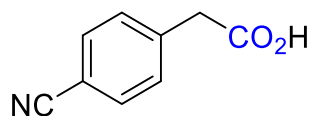

White solid (22.7 mg, 71% yield). Conformed the documental reports.  $^1\text{H}$  NMR (400 MHz,  $\text{CDCl}_3$ )  $\delta$  7.64 (d,  $J = 8.4\text{ Hz}$ , 2H), 7.41 (d,  $J = 8.0\text{ Hz}$ , 2H), 3.72 (s, 2H) ppm;  $^{13}\text{C}$  NMR (100 MHz,  $\text{CDCl}_3$ )  $\delta$  174.9, 138.6, 132.6, 130.4, 118.7, 111.7, 40.9 ppm.

**2-(4-(methoxycarbonyl)phenyl)acetic acid (2k)<sup>5</sup>.**

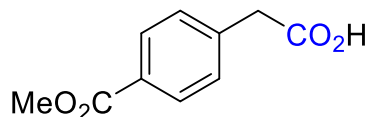

White solid (25.3 mg, 65% yield). Conformed the documental reports.  $^1\text{H}$  NMR (400 MHz,  $\text{CDCl}_3$ )  $\delta$  8.00 (d,  $J = 8.4\text{ Hz}$ , 2H), 7.36 (d,  $J = 8.0\text{ Hz}$ , 2H), 3.91 (s, 3H), 3.71

(s, 2H) ppm;  $^{13}\text{C}$  NMR (100 MHz,  $\text{CDCl}_3$ )  $\delta$  176.5, 167.0, 138.5, 130.1, 129.6, 129.5, 52.3, 41.0 ppm.

**2-(*o*-tolyl)acetic acid (2l)<sup>2</sup>.**

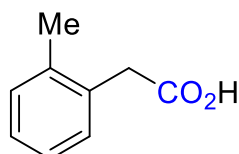

White solid (18.2 mg, 61% yield). Conformed the documental reports.  $^1\text{H}$  NMR (400 MHz,  $\text{CDCl}_3$ )  $\delta$  7.24 – 7.16 (m, 4H), 3.68 (s, 2H), 2.34 (s, 3H) ppm;  $^{13}\text{C}$  NMR (100 MHz,  $\text{CDCl}_3$ )  $\delta$  178.0, 137.1, 132.1, 130.6, 130.4, 127.8, 126.3, 39.0, 19.7 ppm.

**2-(2-ethylphenyl)acetic acid (2m)<sup>7</sup>.**

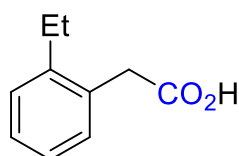

White solid (16.7 mg, 51% yield). Conformed the documental reports.  $^1\text{H}$  NMR (400 MHz,  $\text{CDCl}_3$ )  $\delta$  7.26 – 7.14 (m, 4H), 3.68 (s, 2H), 2.66 (q,  $J = 7.6$  Hz, 2H), 1.21 (t,  $J = 7.6$  Hz, 3H) ppm;  $^{13}\text{C}$  NMR (100 MHz,  $\text{CDCl}_3$ )  $\delta$  178.0, 142.8, 131.4, 130.7, 128.8, 128.0, 126.2, 38.37, 25.9, 14.9 ppm.

**2-(3-methoxyphenyl)acetic acid (2n)<sup>3</sup>.**

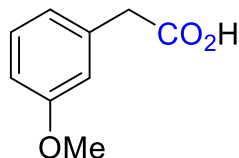

White solid (17.6 mg, 53% yield). Conformed the documental reports.  $^1\text{H}$  NMR (400 MHz,  $\text{CDCl}_3$ )  $\delta$  7.30 – 7.28 (m, 1H), 6.91 – 6.85 (m, 3H), 3.83 (s, 3H), 3.66 (s, 2H) ppm;  $^{13}\text{C}$  NMR (100 MHz,  $\text{CDCl}_3$ )  $\delta$  177.4, 159.9, 134.8, 129.8, 121.9, 115.2, 113.0, 55.4, 41.2 ppm.

**2-(3-phenoxyphenyl)acetic acid (2o)<sup>3</sup>.**

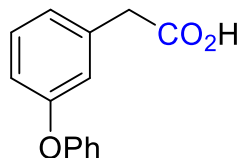

White solid (42.6 mg, 88% yield). Conformed the documental reports.  $^1\text{H}$  NMR (400 MHz,  $\text{CDCl}_3$ )  $\delta$  7.37 – 7.28 (m, 3H), 7.12 (t,  $J = 7.4$  Hz, 1H), 7.03 (d,  $J = 8.0$  Hz, 3H), 6.97 – 6.92 (m, 2H), 3.64 (s, 2H) ppm;  $^{13}\text{C}$  NMR (100 MHz,  $\text{CDCl}_3$ )  $\delta$  177.7, 157.6, 157.0, 135.2, 130.0, 129.9, 124.3, 123.6, 119.9, 119.2, 117.7, 41.0 ppm.

**2-(3-(trifluoromethoxy)phenyl)acetic acid (2p).**

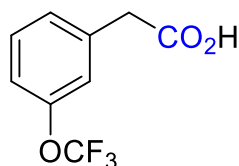

White solid (35.7 mg, 81% yield). Conformed the documental reports.  $^1\text{H}$  NMR (400 MHz,  $\text{CDCl}_3$ )  $\delta$  7.46 (t,  $J = 7.6$  Hz, 1H), 7.36 – 7.31 (m, 1H), 7.26 – 7.24 (m, 2H), 3.77 (s, 2H).  $^{13}\text{C}$  NMR (100 MHz,  $\text{CDCl}_3$ )  $\delta$  177.40, 149.5, 135.4, 130.1, 128.0, 122.2, 120.6 (q,  $J = 255.6$  Hz), 120.0, 40.74 ppm. HRMS (ESI)  $m/z$ :  $[\text{M}-\text{H}]^-$  Calcd for  $\text{C}_9\text{H}_6\text{F}_3\text{O}_3^-$  219.0275; Found 219.0270.

**2-(*m*-tolyl)acetic acid (2q)<sup>2</sup>.**

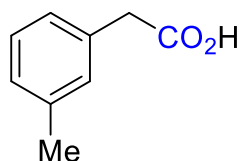

White solid (25.2 mg, 84% yield). Conformed the documental reports.  $^1\text{H}$  NMR (400 MHz,  $\text{CDCl}_3$ )  $\delta$  7.24 – 7.21 (m, 1H), 7.10 – 7.08 (m, 3H), 3.61 (s, 2H), 2.34 (s, 3H) ppm;  $^{13}\text{C}$  NMR (100 MHz,  $\text{CDCl}_3$ )  $\delta$  177.4, 138.5, 133.3, 130.3, 128.7, 128.3, 126.5, 41.1, 21.5 ppm.

**2-(3, 5-dimethoxyphenyl)acetic acid (2r)<sup>4</sup>.**

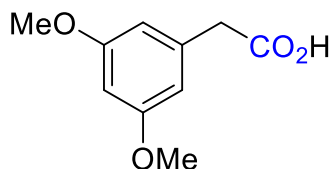

White solid (25.9 mg, 66% yield). Conformed the documental reports.  $^1\text{H}$  NMR (400 MHz,  $\text{CDCl}_3$ )  $\delta$  6.44 (d,  $J = 2.4$  Hz, 2H), 6.39 (t,  $J = 2.2$  Hz, 1H), 3.78 (s, 6H), 3.58 (s, 2H) ppm;  $^{13}\text{C}$  NMR (100 MHz,  $\text{CDCl}_3$ )  $\delta$  177.3, 161.1, 135.4, 107.6, 99.6, 55.5, 41.4 ppm.

**2-(naphthalen-1-yl)acetic acid (2s).<sup>9</sup>**

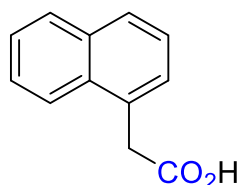

White solid (23.5 mg, 63% yield). Conformed the documental reports.  $^1\text{H}$  NMR (400 MHz,  $\text{CDCl}_3$ )  $\delta$  7.96 (d,  $J = 8.0$  Hz, 1H), 7.87 (d,  $J = 7.6$  Hz, 1H), 7.82 (d,  $J = 8.0$  Hz, 1H), 7.56 – 7.48 (m, 2H), 7.46 – 7.40 (m, 2H), 4.09 (s, 2H).  $^{13}\text{C}$  NMR (100 MHz,  $\text{CDCl}_3$ )  $\delta$  177.8, 133.9, 132.1, 129.9, 128.9, 128.5, 128.4, 126.7, 126.0, 125.6, 123.8, 38.9 ppm.

**2-(naphthalen-2-yl)acetic acid (2t)<sup>2</sup>.**

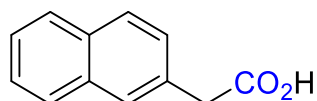

White solid (19.7 mg, 53% yield). Conformed the documental reports.  $^1\text{H}$  NMR (400 MHz,  $\text{CDCl}_3$ )  $\delta$  7.81 (t,  $J = 8.0$  Hz, 3H), 7.74 (s, 1H), 7.49 – 7.44 (m, 2H), 7.41 (dd,  $J = 8.4, 1.6$  Hz, 1H), 3.82 (s, 2H) ppm;  $^{13}\text{C}$  NMR (100 MHz,  $\text{CDCl}_3$ )  $\delta$  177.3, 133.6, 132.7, 130.9, 128.5, 128.3, 127.8, 127.8, 127.4, 126.4, 126.1, 41.3 ppm.

**2-phenylpropanoic acid (2u)<sup>2</sup>.**

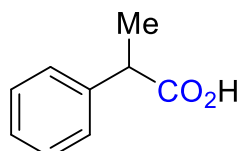

Colorless oil (24.5 mg, 82% yield). Conformed the documental reports.  $^1\text{H}$  NMR (400 MHz,  $\text{CDCl}_3$ )  $\delta$  7.34 (d,  $J = 4.0$  Hz, 4H), 7.30 – 7.27 (m, 1H), 3.76 (q,  $J = 7.2$  Hz, 1H), 1.53 (d,  $J = 7.2$  Hz, 3H) ppm;  $^{13}\text{C}$  NMR (100 MHz,  $\text{CDCl}_3$ )  $\delta$  180.9, 139.9, 128.8, 127.8, 127.5, 45.5, 18.2 ppm.

**2-(*m*-tolyl)propanoic acid (2v)<sup>5</sup>.**

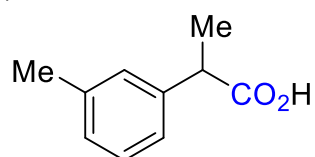

Colorless oil (15.7 mg, 48% yield). Conformed the documental reports.  $^1\text{H}$  NMR (400 MHz,  $\text{CDCl}_3$ )  $\delta$  7.23 (t,  $J = 7.6$  Hz, 1H), 7.14 – 7.08 (m, 3H), 3.71 (q,  $J = 7.2$  Hz, 1H), 2.36 (s, 3H), 1.51 (d,  $J = 7.2$  Hz, 3H) ppm;  $^{13}\text{C}$  NMR (100 MHz,  $\text{CDCl}_3$ )  $\delta$  180.8, 139.9, 138.5, 128.7, 128.5, 128.3, 124.8, 45.4, 21.6, 18.2 ppm.

**2-(3-phenoxyphenyl)propanoic acid (2w)<sup>3</sup>.**

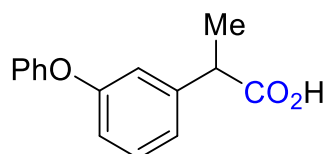

White solid (40.6 mg, 83% yield). Conformed the documental reports.  $^1\text{H}$  NMR (400 MHz,  $\text{CDCl}_3$ )  $\delta$  7.31 – 7.27 (m, 2H), 7.24 – 7.21 (m, 1H), 7.08 – 7.01 (m, 2H), 6.99 – 6.96 (m, 3H), 6.86 – 6.84 (m, 1H), 3.68 (q,  $J = 7.2$  Hz, 1H), 1.46 (d,  $J = 7.2$  Hz, 3H) ppm;  $^{13}\text{C}$  NMR (100 MHz,  $\text{CDCl}_3$ )  $\delta$  180.3, 157.6, 157.1, 141.8, 130.0, 129.9, 123.5, 122.5, 119.1, 118.4, 117.6, 45.3, 18.2 ppm.

**2-(*o*-tolyl)propanoic acid (2x)<sup>5</sup>.**

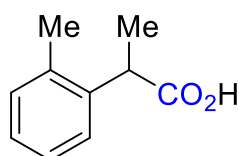

White solid (24.3 mg, 74% yield). Conformed the documental reports.  $^1\text{H}$  NMR (400 MHz,  $\text{CDCl}_3$ )  $\delta$  7.30 (d,  $J = 6.8$  Hz, 1H), 7.23 – 7.17 (m, 3H), 3.99 (q,  $J = 7.2$  Hz, 1H), 2.39 (s, 3H), 1.50 (d,  $J = 6.8$  Hz, 3H) ppm;  $^{13}\text{C}$  NMR (100 MHz,  $\text{CDCl}_3$ )  $\delta$  180.9, 138.5, 136.1, 130.7, 127.3, 126.7, 126.6, 41.2, 19.8, 17.7 ppm.

**2-(*p*-tolyl)propanoic acid (2y)<sup>2</sup>.**

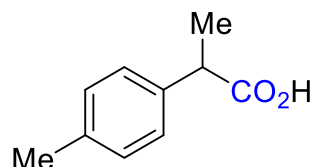

Colorless oil (17.3 mg, 53% yield). Conformed the documental reports.  $^1\text{H}$  NMR (400 MHz,  $\text{CDCl}_3$ )  $\delta$  7.22 (d,  $J = 8.0$  Hz, 2H), 7.15 (d,  $J = 8.0$  Hz, 2H), 3.71 (q,  $J = 7.2$  Hz, 1H), 2.33 (s, 3H), 1.50 (d,  $J = 7.2$  Hz, 3H) ppm;  $^{13}\text{C}$  NMR (100 MHz,  $\text{CDCl}_3$ )  $\delta$  181.0, 137.2, 136.9, 129.5, 127.6, 45.0, 21.2, 18.2 ppm.

**2-(4-chlorophenyl)propanoic acid (2z)<sup>6</sup>.**

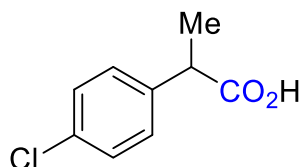

White solid (22.9 mg, 62% yield). Conformed the documental reports.  $^1\text{H}$  NMR (400 MHz,  $\text{CDCl}_3$ )  $\delta$  7.31 (d,  $J = 8.8$  Hz, 2H), 7.26 (d,  $J = 8.8$  Hz, 2H), 3.72 (q,  $J = 7.2$  Hz, 1H), 1.50 (d,  $J = 7.2$  Hz, 3H) ppm;  $^{13}\text{C}$  NMR (100 MHz,  $\text{CDCl}_3$ )  $\delta$  180.3, 138.3, 133.5, 129.2, 129.0, 44.9, 18.2 ppm.

**methyl 2-(thiophen-2-yl)acetate. (2a')<sup>10</sup>**

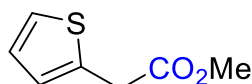

Brown oily liquid (11.0 mg, 35% yield).  $^1\text{H}$  NMR (400 MHz,  $\text{CDCl}_3$ )  $\delta$  7.29 (dd,  $J = 4.8, 2.8$  Hz, 1H), 7.15 – 7.14 (d,  $J = 1.8$  Hz, 1H), 7.04 (d,  $J = 4.8$  Hz, 1H), 3.71 (s, 3H), 3.67 (s, 2H) ppm.  $^{13}\text{C}$  NMR (100 MHz,  $\text{CDCl}_3$ )  $\delta$  171.7, 133.7, 128.6, 125.9, 123.0, 52.2, 35.8 ppm.

**8. References.**

- [1] M. S. M. Pearson, D. R. Carbery, *J. Org. Chem.* **2009**, *74*, 5320-5325.
- [2] D.-T. Yang, M. Zhu, Z. J. Schiffer, K. Williams, X. Song, X. Liu, K. Manthiram, *ACS Catal.* **2019**, *9*, 4699-4705.
- [3] C.-K. Ran, Y.-N. Niu, L. Song, M.-K. Wei, Y.-F. Cao, S.-P. Luo, Y.-M. Yu, L.-L. Liao, D.-G. Yu, *ACS Catal.* **2022**, *12*, 18-24.
- [4] J.-S. Zhong, Z.-X. Yang, C.-L. Ding, Y.-F. Huang, Y. Zhao, H. Yan, K.-Y. Ye, *J.*

*Org. Chem.* **2021**, *86*, 16162-16170.

[5] Z. Huang, Y. Cheng, X. Chen, H.-F. Wang, C.-X. Du, Y. Li, *Chem. Commun.* **2018**, *54*, 3967-3970.

[6] J. Li, J. Shen, C. Xia, Y. Wang, D. Liu, W. Zhang, *Org. Lett.* **2016**, *18*, 2122-2125.

[7] J. M. Burns, E. H. Krenske, R. P. McGeary, *Eur. J. Org. Chem.* **2017**, *2017*, 252-256.

[8] L. Tao, W. Yang, W. Zhao, *ChemistrySelect* **2021**, *6*, 8532-8536.

[9] C. Li, P. Zhao, R. Li, B. Zhang, W. Zhao, *Angew. Chem. Int. Ed.* **2020**, *59*, 10913-10917.

[10] Y. Li, Z. Wang, X.-F. Wu, *ACS Catal.* **2018**, *8*, 738-741.

## 9. NMR Spectra of Coupled Products

7.909  
7.906  
7.761  
7.750  
7.742  
7.731  
7.722  
7.688  
7.669  
7.656  
7.638  
7.621  
7.306  
7.300  
7.285  
7.251  
7.232  
7.213  
6.982  
6.979  
6.965  
6.960

5.158  
5.119

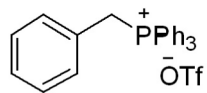

(1a,  $^1\text{H}$  NMR, 400 MHz,  $\text{DMSO-}d_6$ )

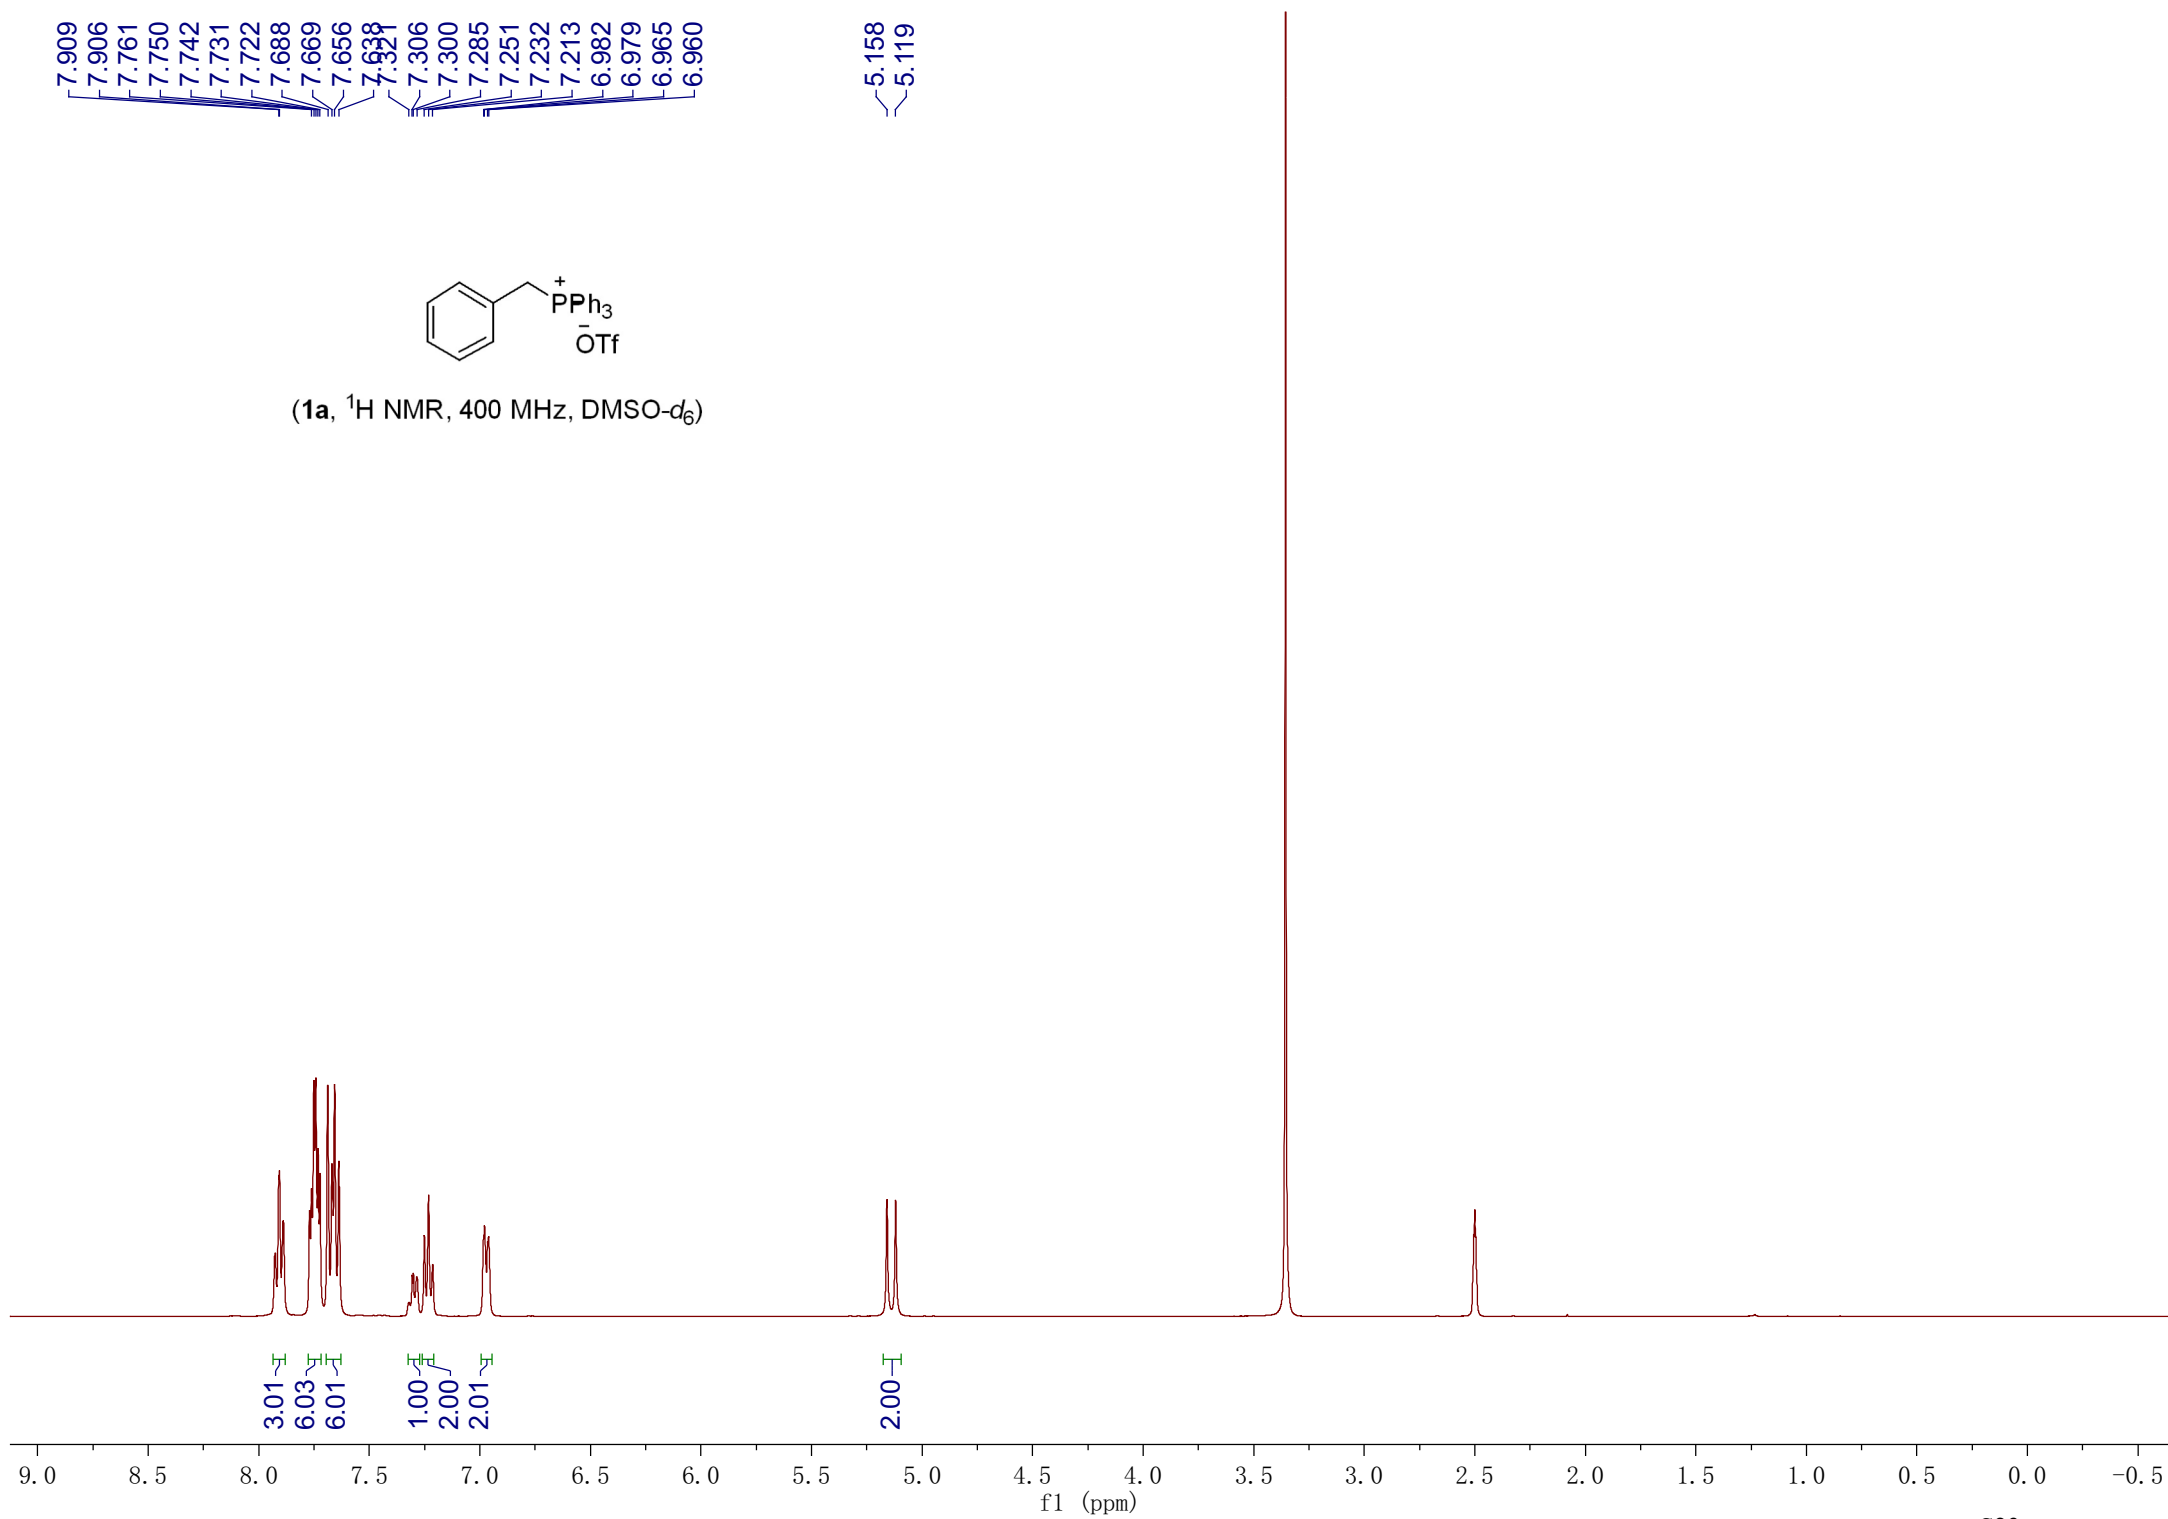

3.01

6.03

6.01

1.00

2.00

2.01

2.00

(1a, <sup>13</sup>C NMR, 100 MHz, DMSO-d<sub>6</sub>)

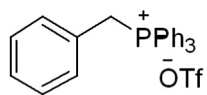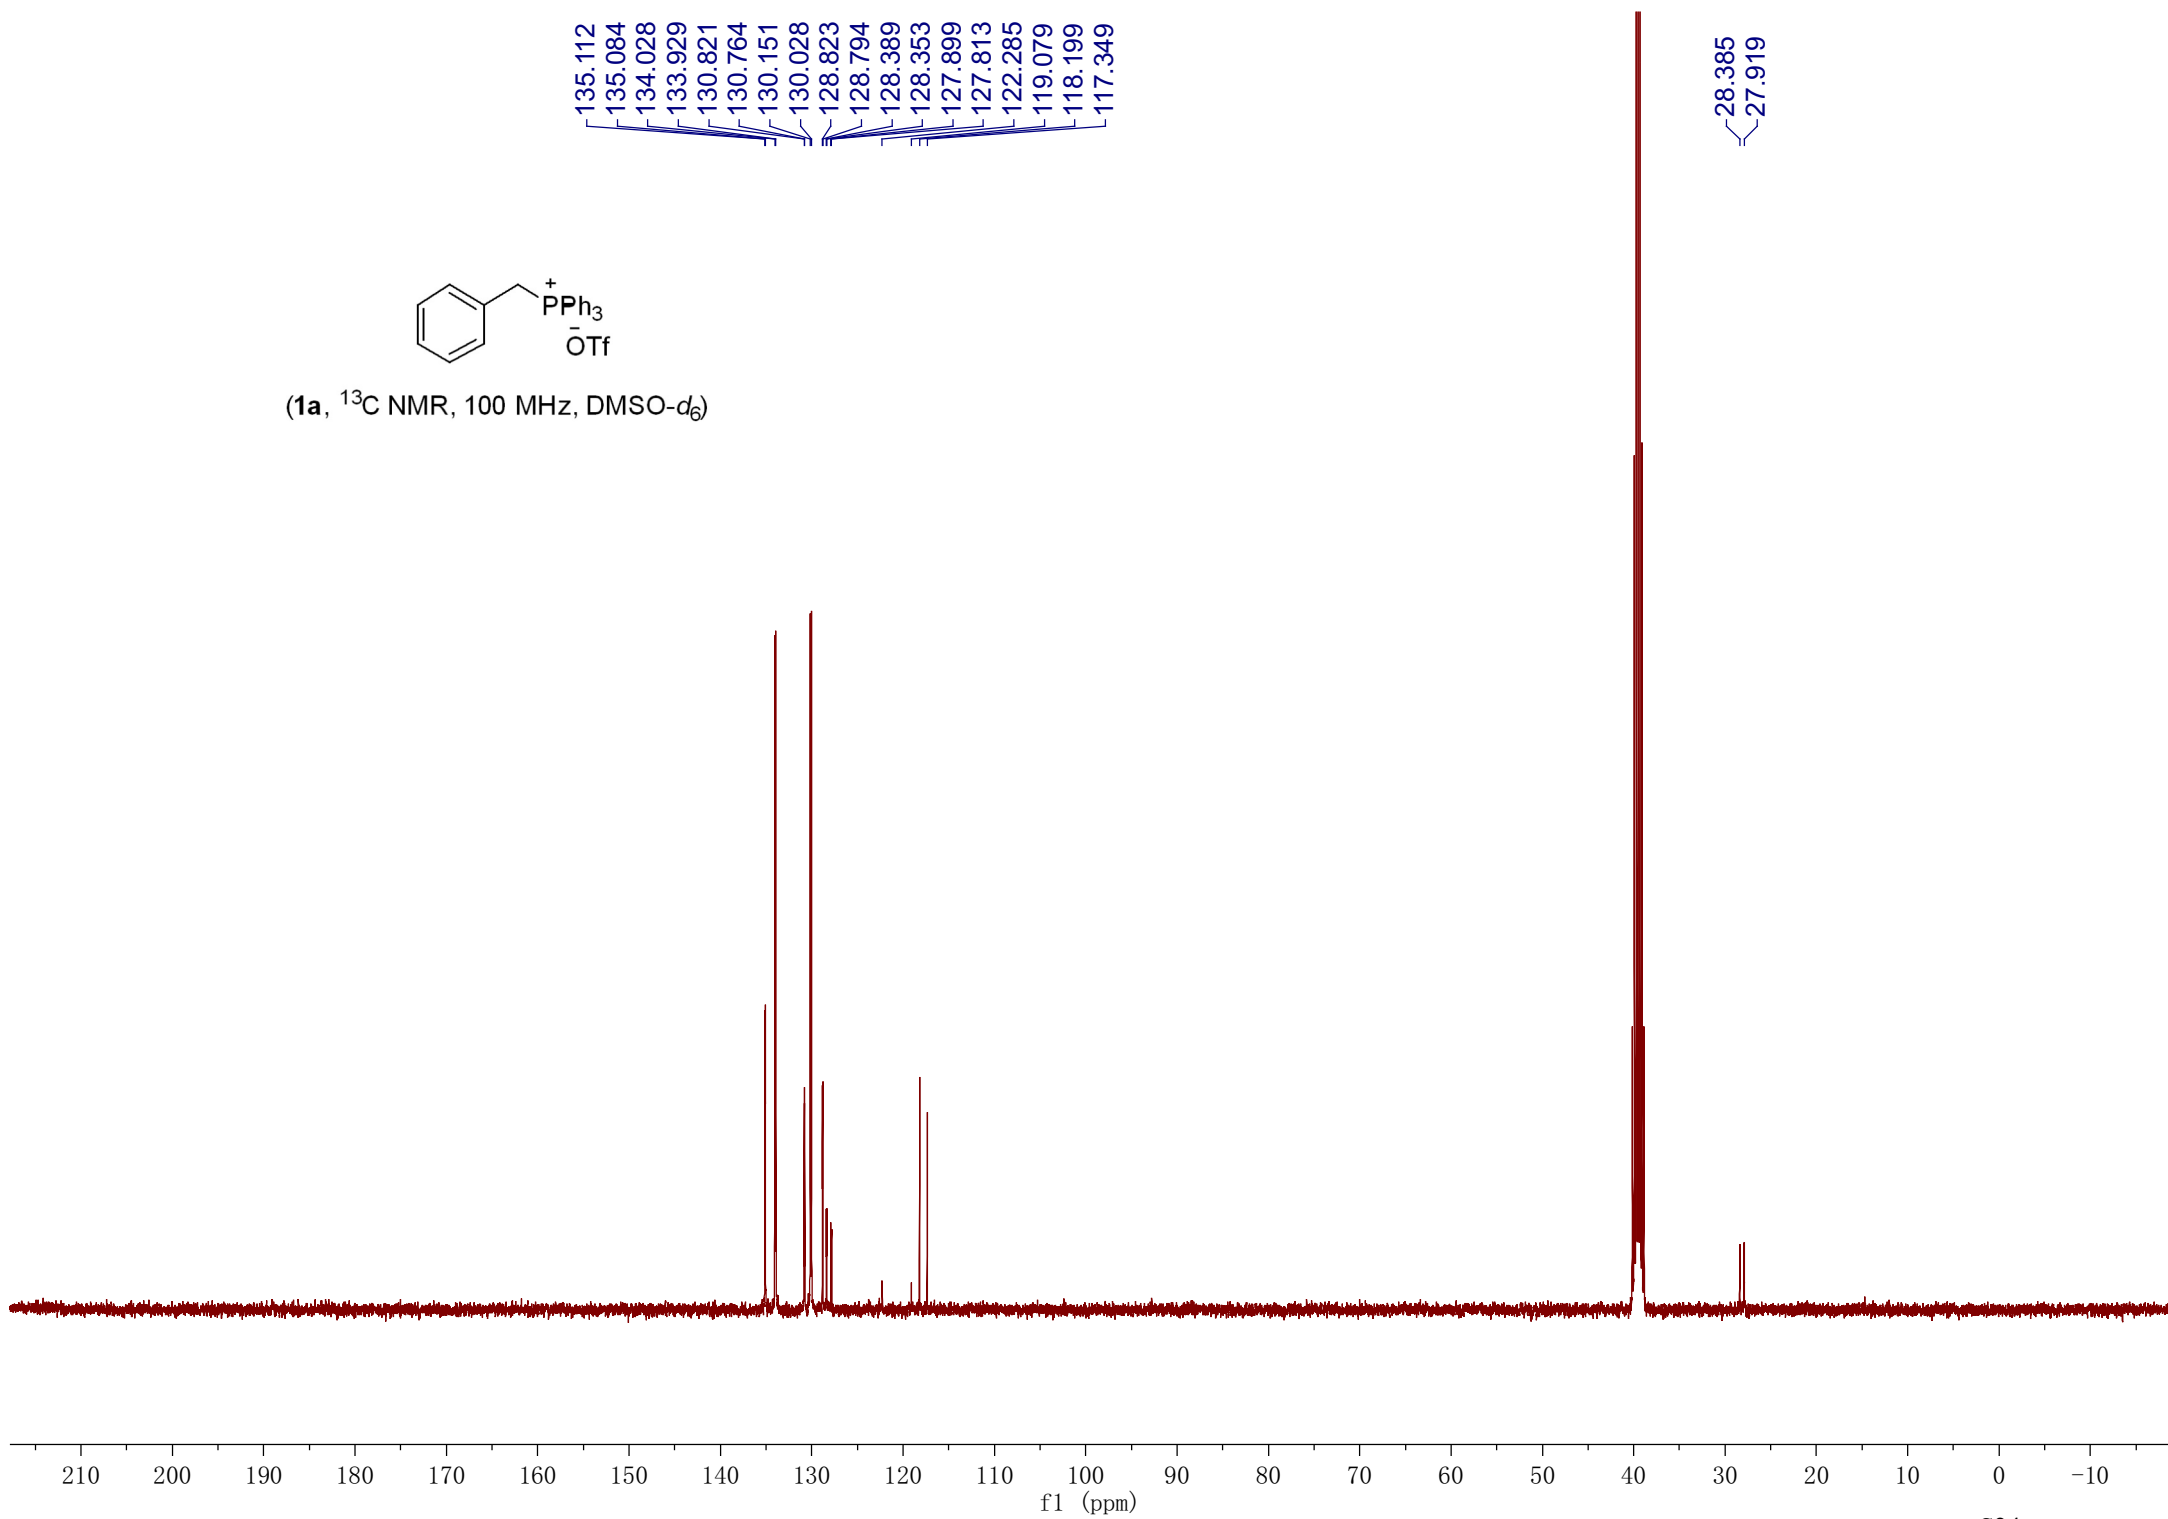



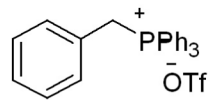

(1a,  $^{31}\text{P}$  NMR, 162 MHz, DMSO- $d_6$ )

—23.087

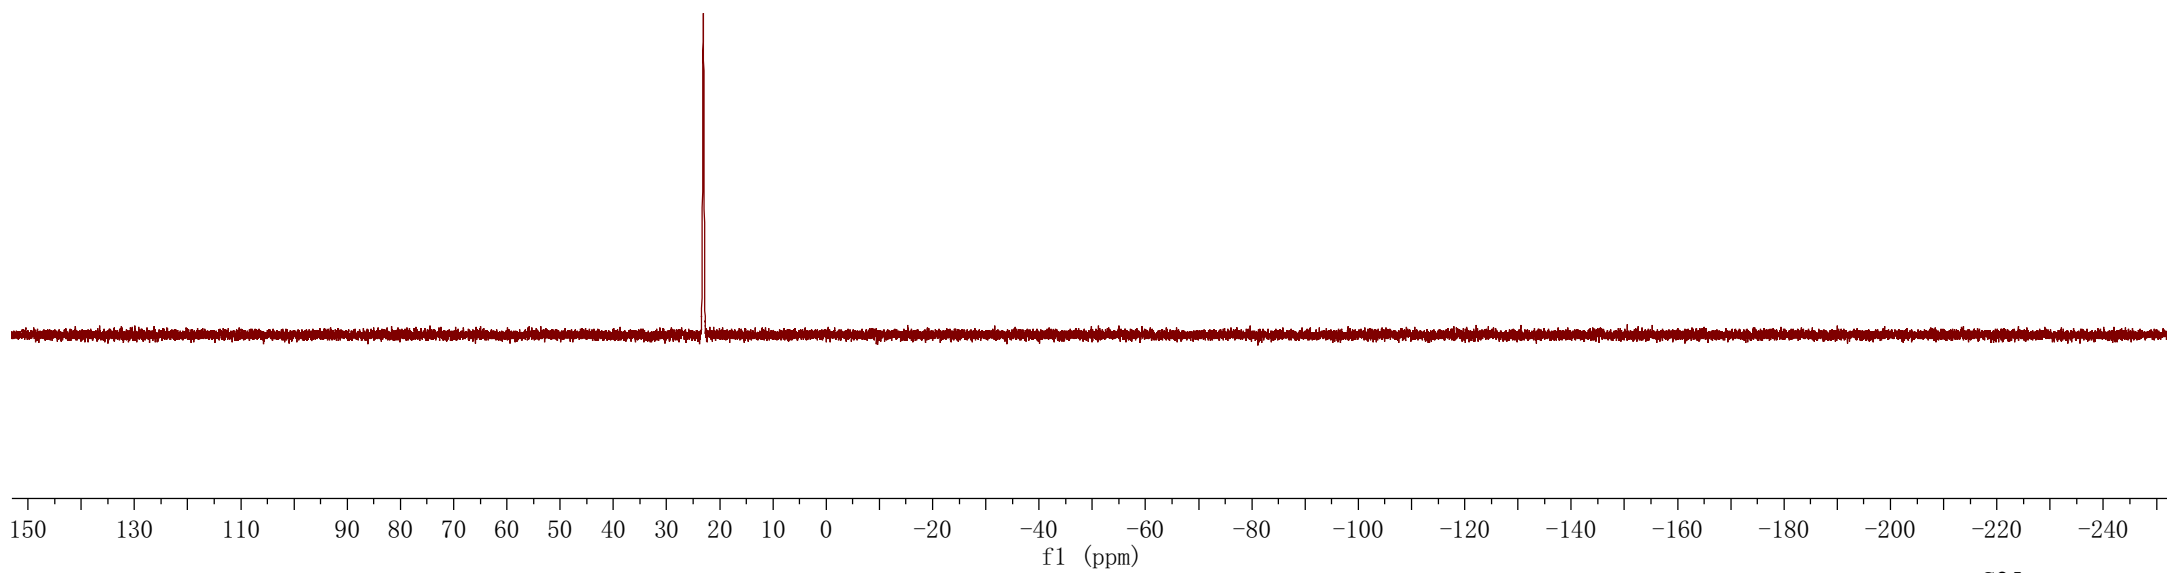

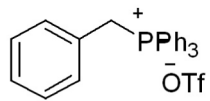

(1a,  $^{19}\text{F}$  NMR, 376 MHz, DMSO- $d_6$ )

---77.729

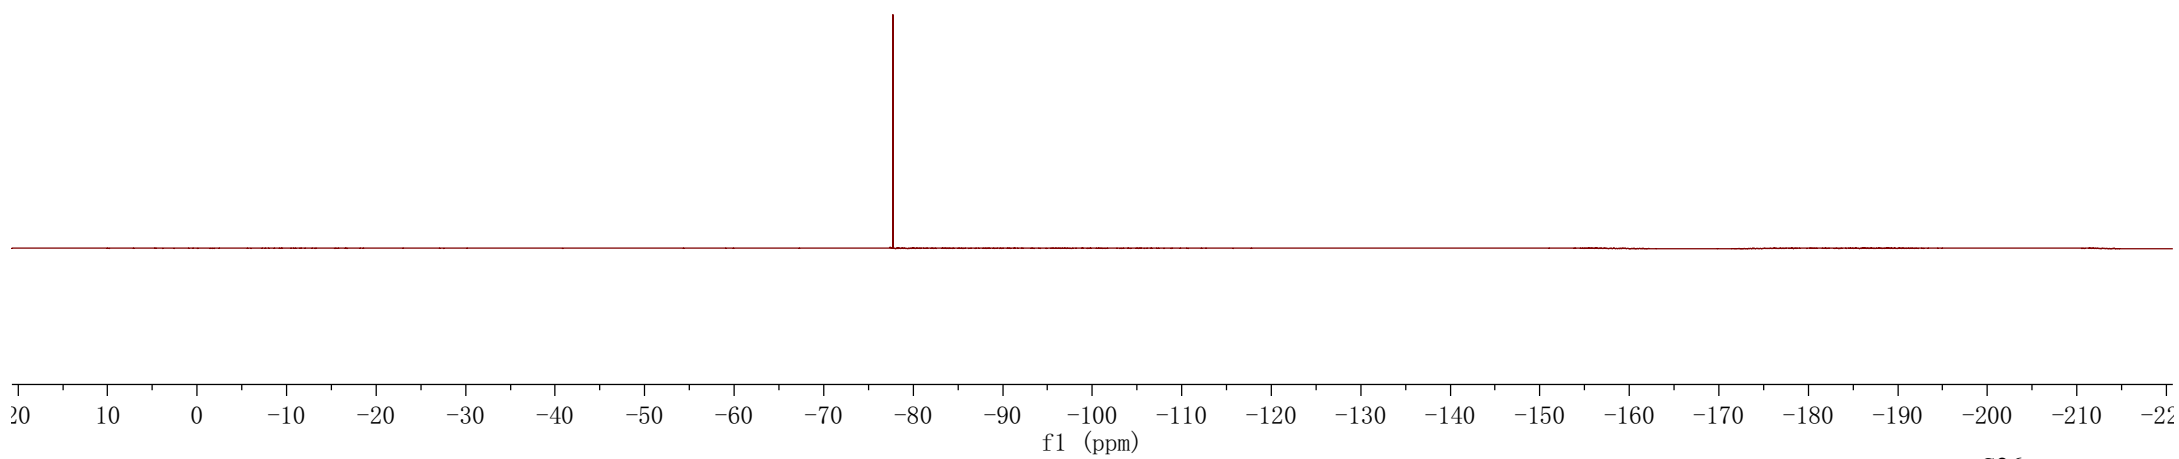

7.907  
7.902  
7.750  
7.741  
7.731  
7.722  
7.686  
7.667  
7.664  
7.655  
7.636  
7.624  
7.623  
7.034  
6.863  
6.857  
6.843  
6.837

5.104  
5.065

2.236  
2.231

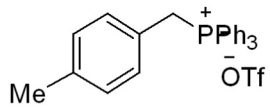

(1b, <sup>1</sup>H NMR, 400 MHz, DMSO-d<sub>6</sub>)

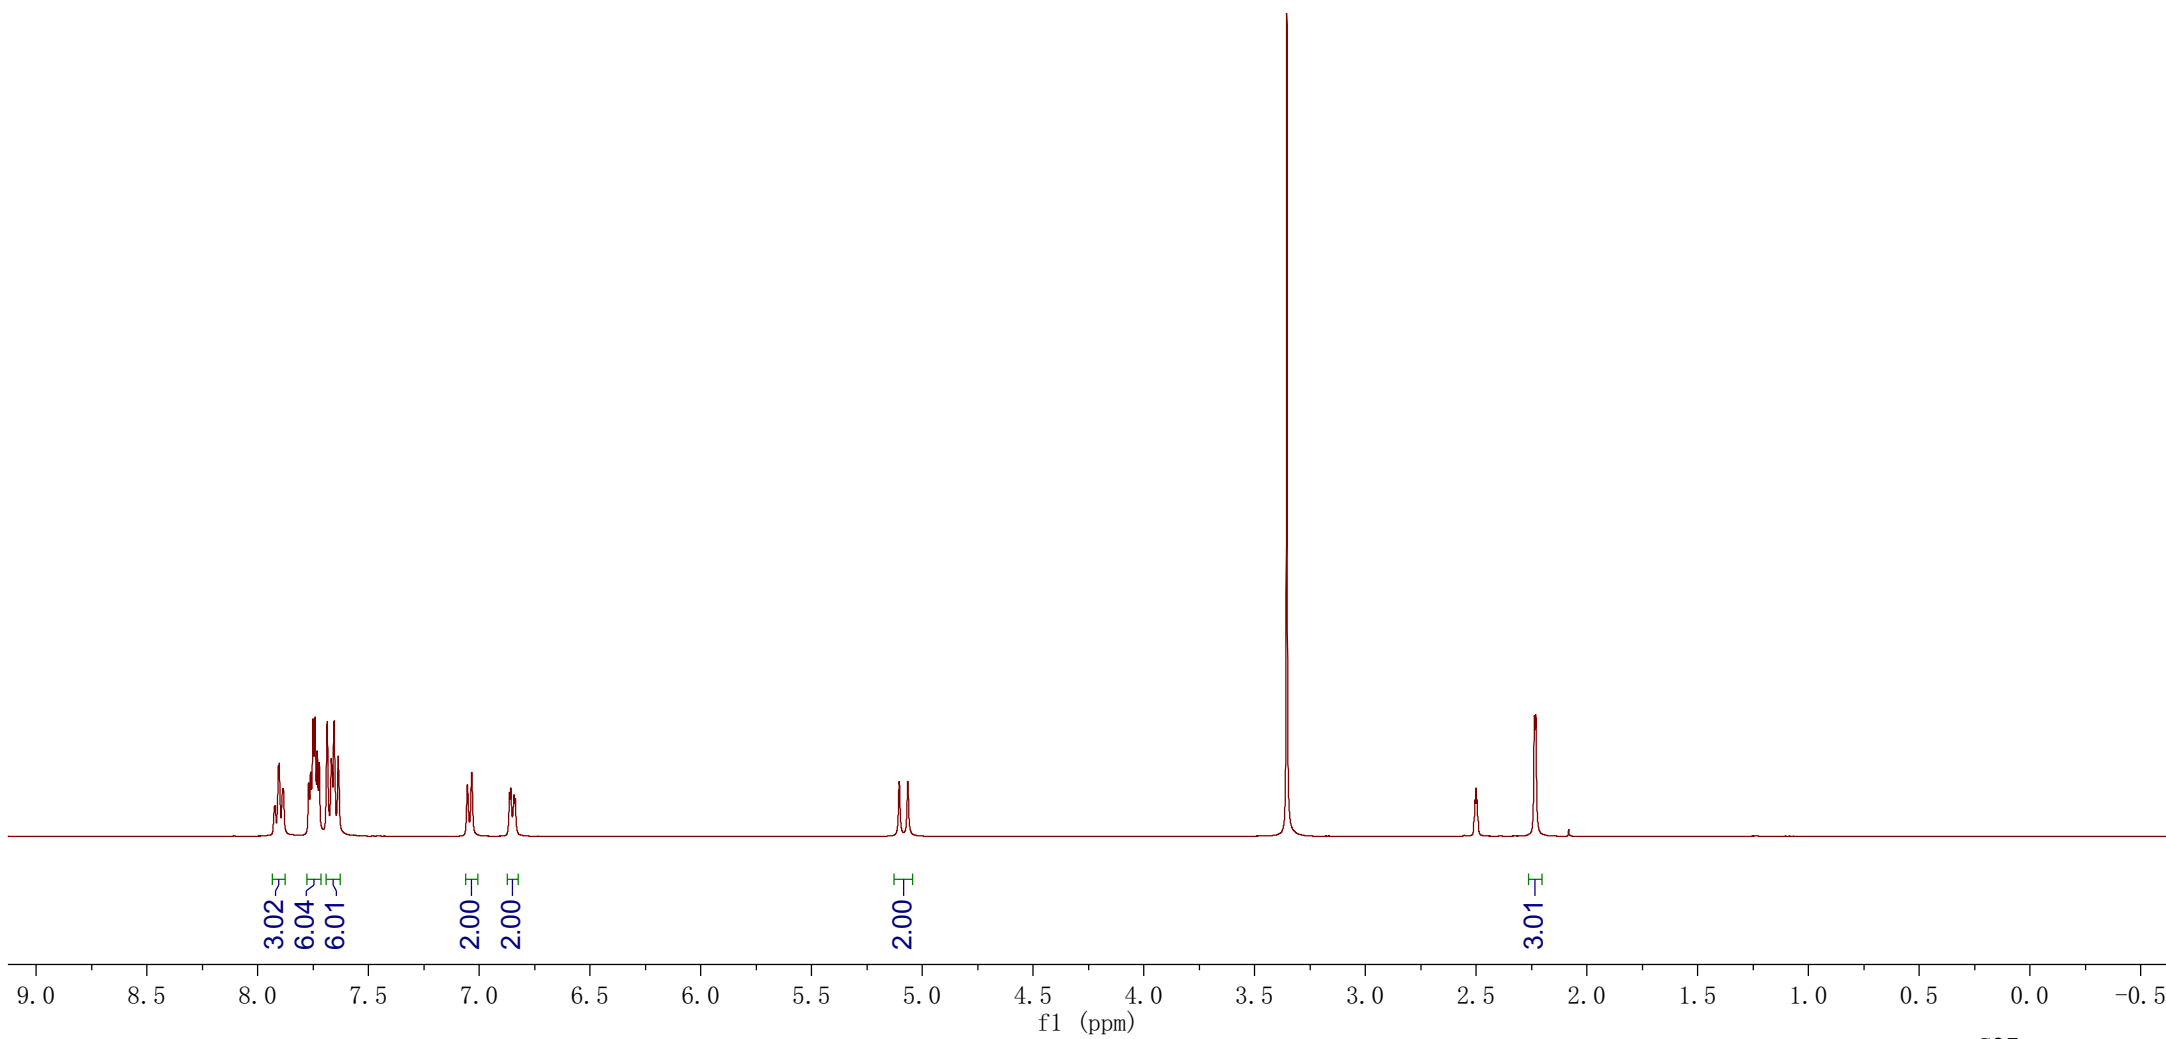

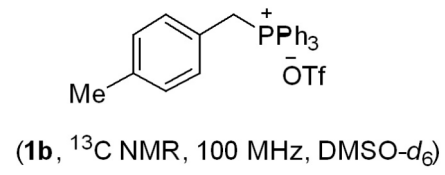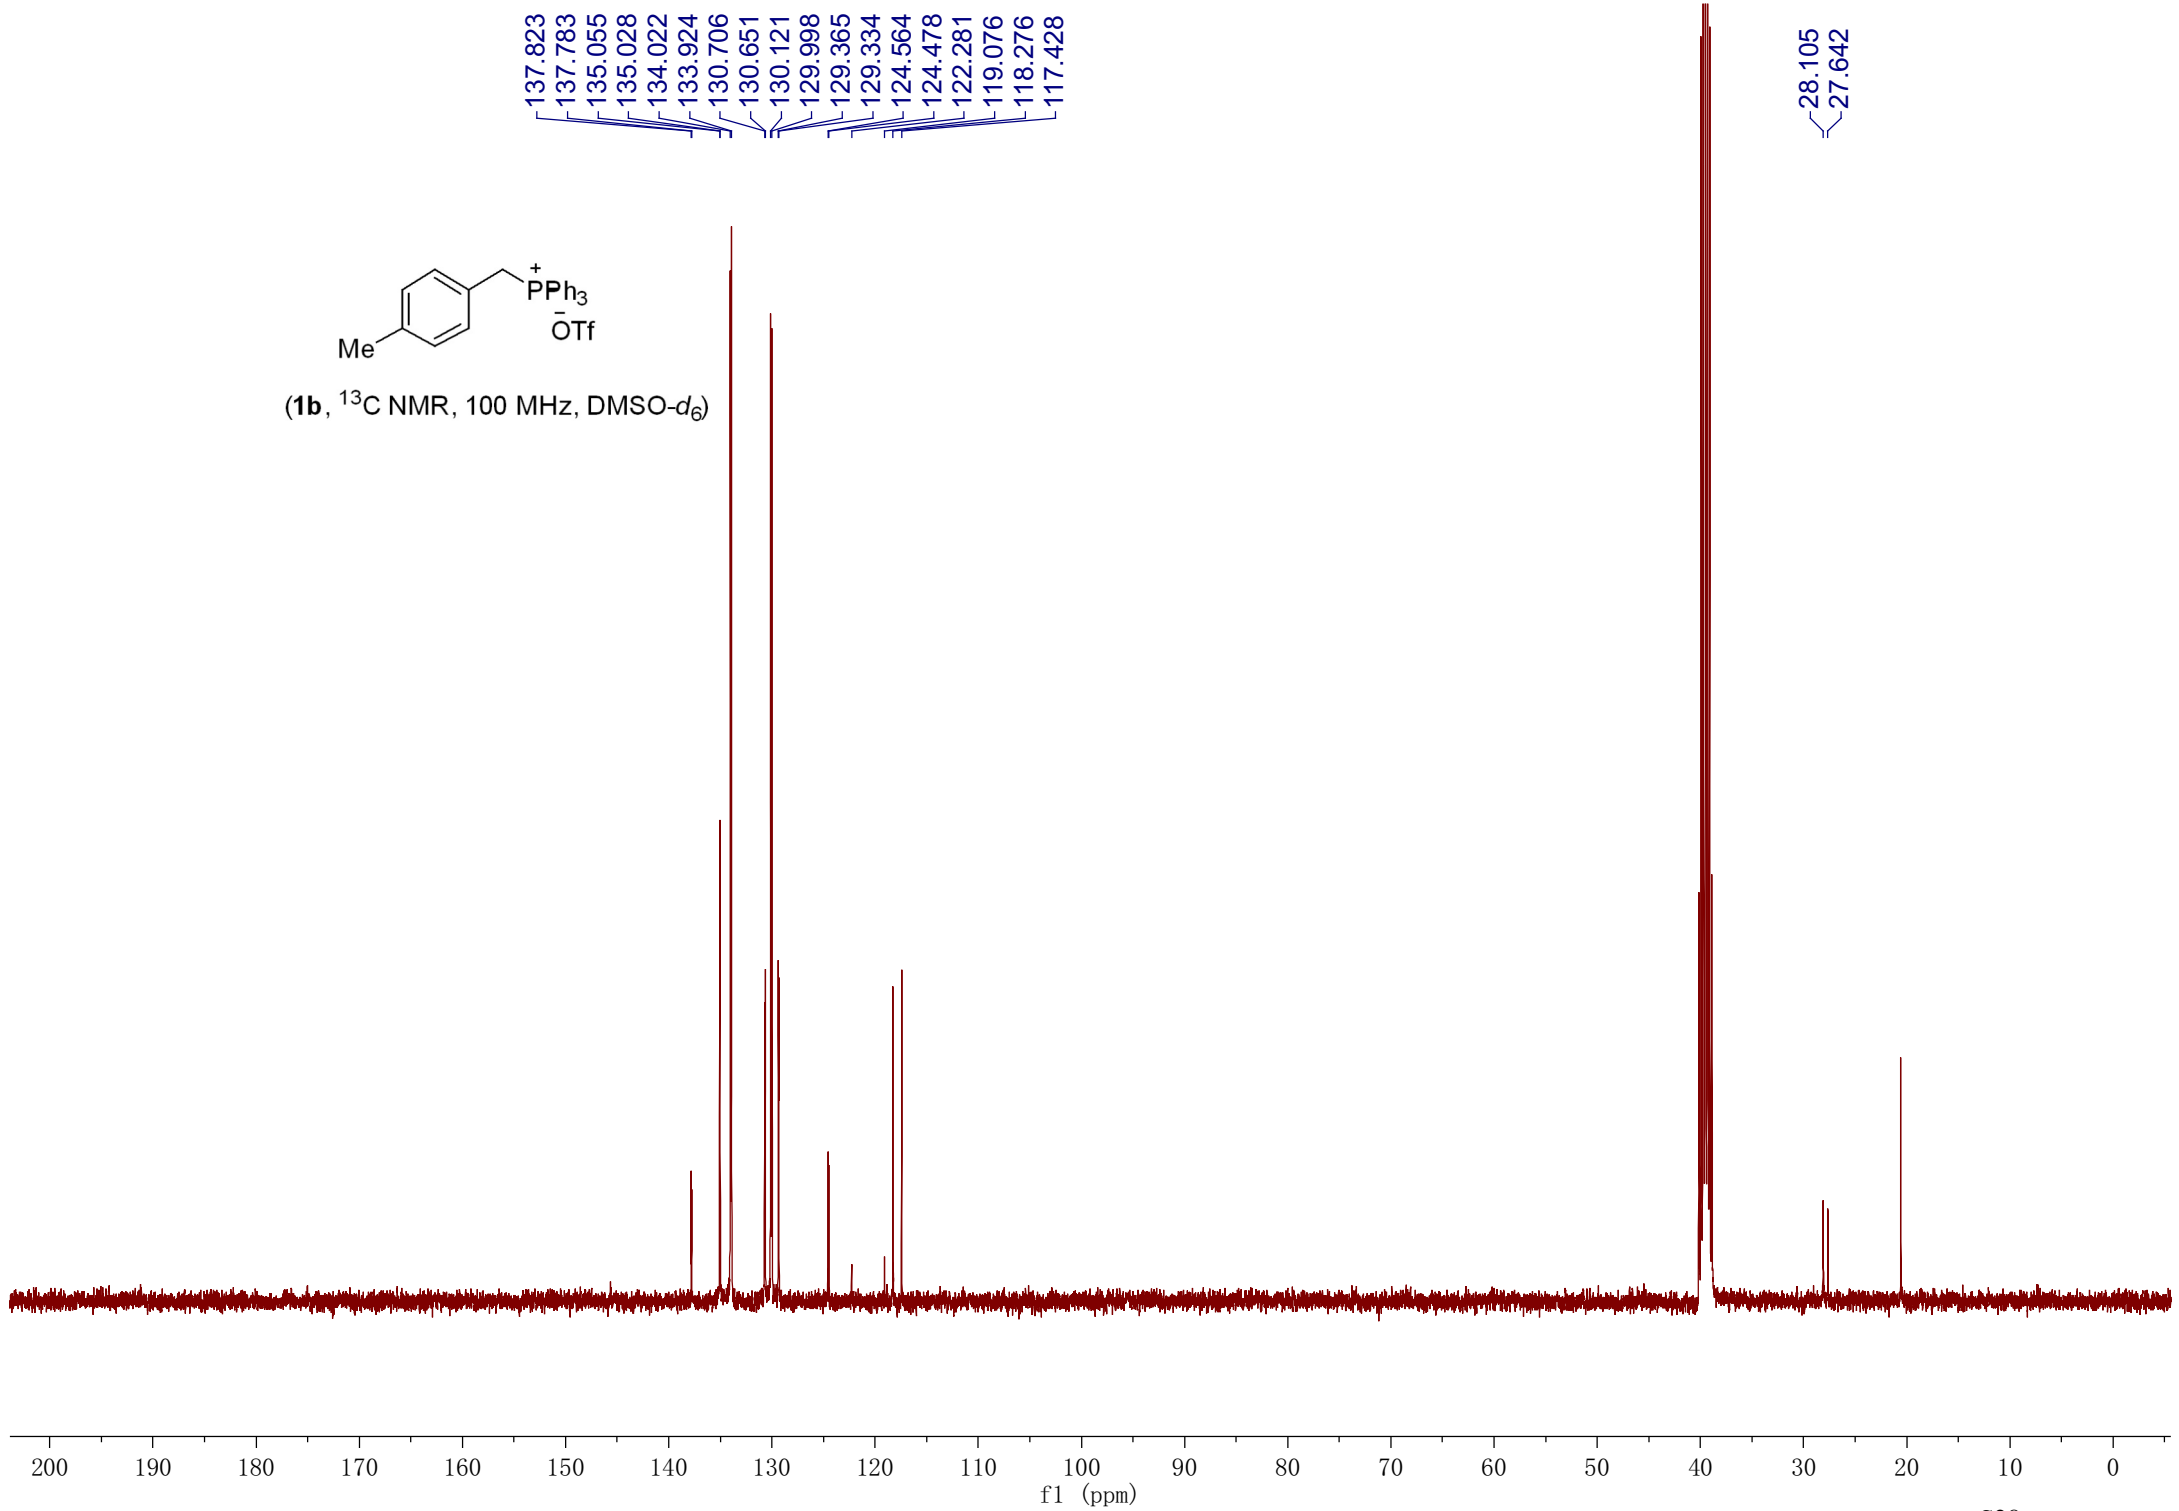

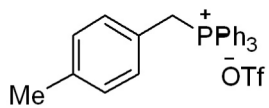

(1b,  $^{31}\text{P}$  NMR 162 MHz, DMSO- $d_6$ )

—22.619

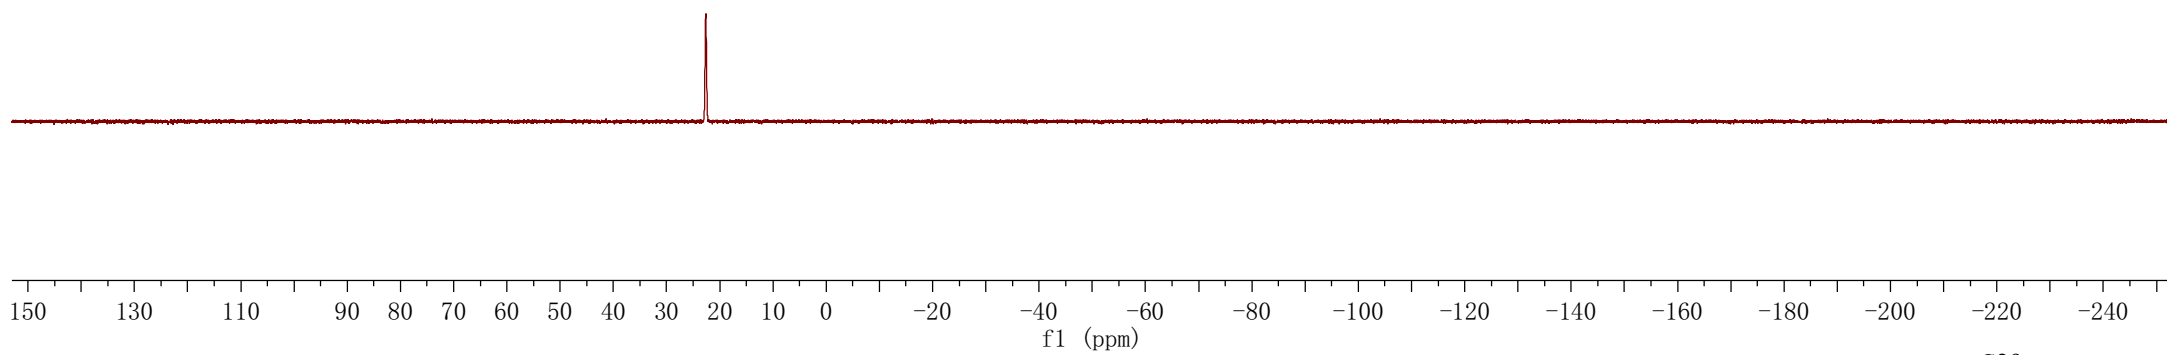

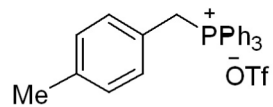

(1b,  $^{19}\text{F}$  NMR, 376 MHz, DMSO- $d_6$ )

---77.722

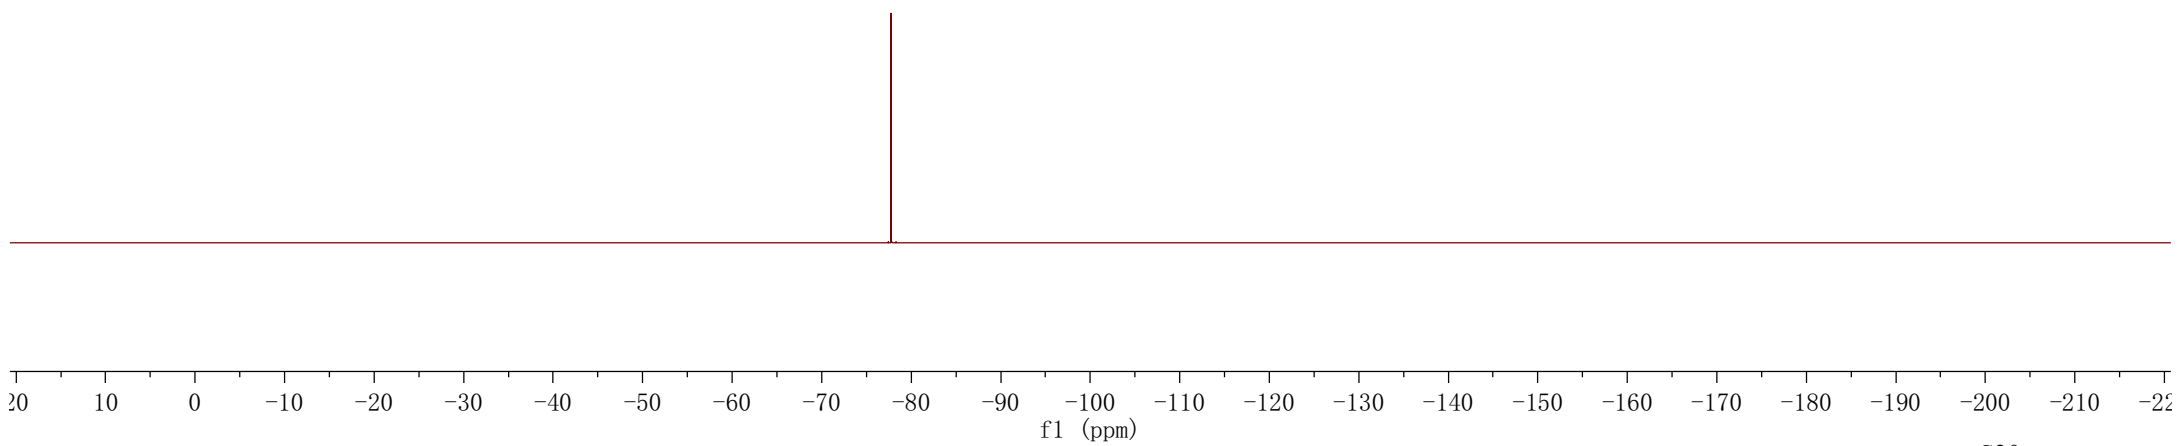

7.911  
7.908  
7.764  
7.755  
7.744  
7.736  
7.725  
7.717  
7.673  
7.654  
7.642  
7.623  
7.597  
7.236  
6.912  
6.906  
6.891  
6.885

5.114  
5.075

1.223

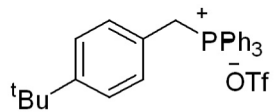

(1c, <sup>1</sup>H NMR, 400 MHz, DMSO-*d*<sub>6</sub>)

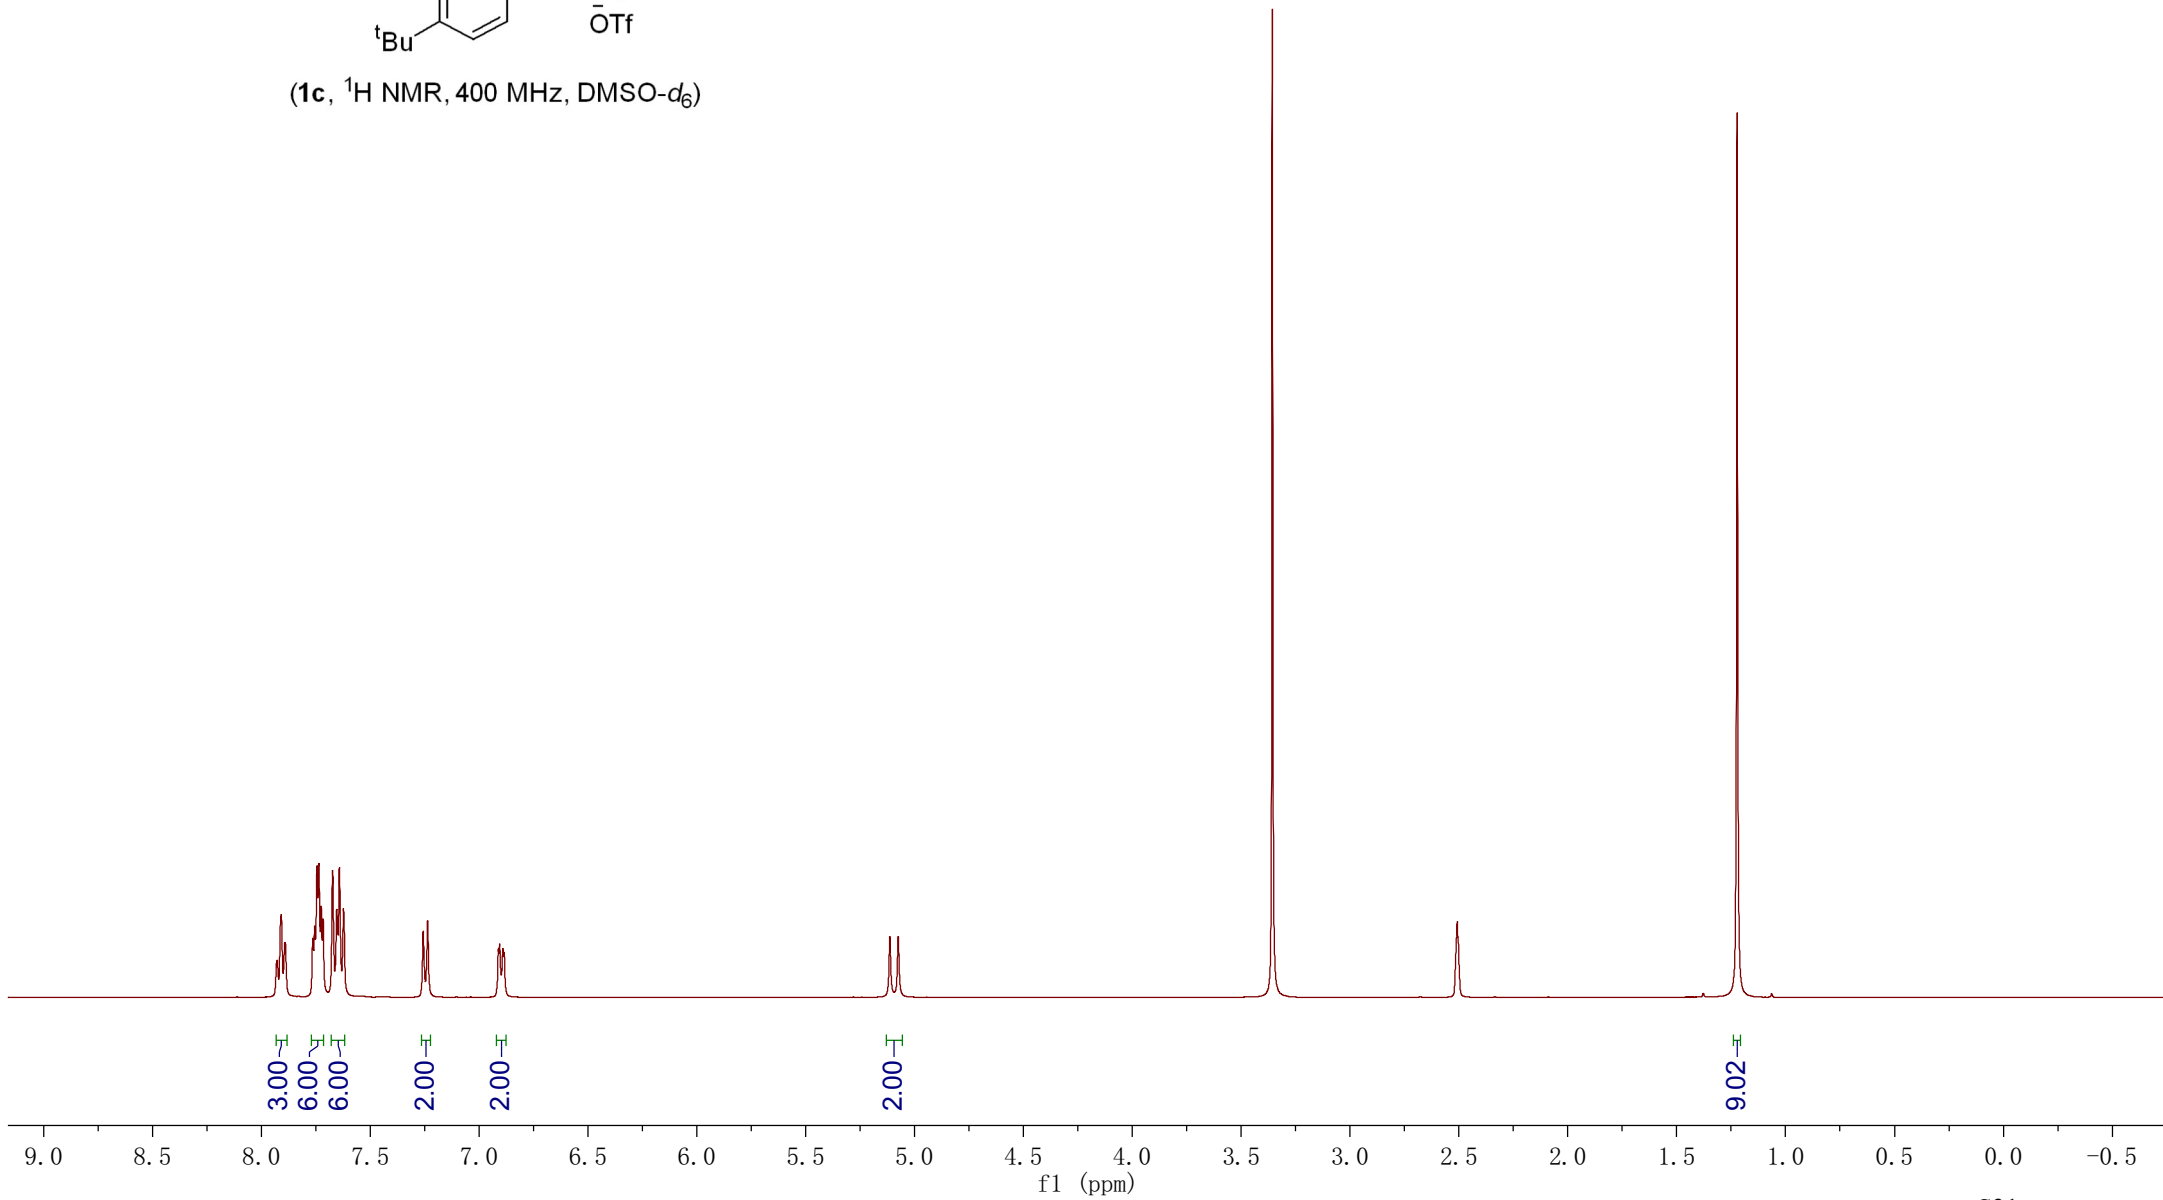

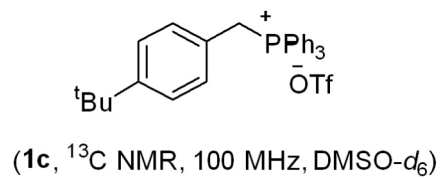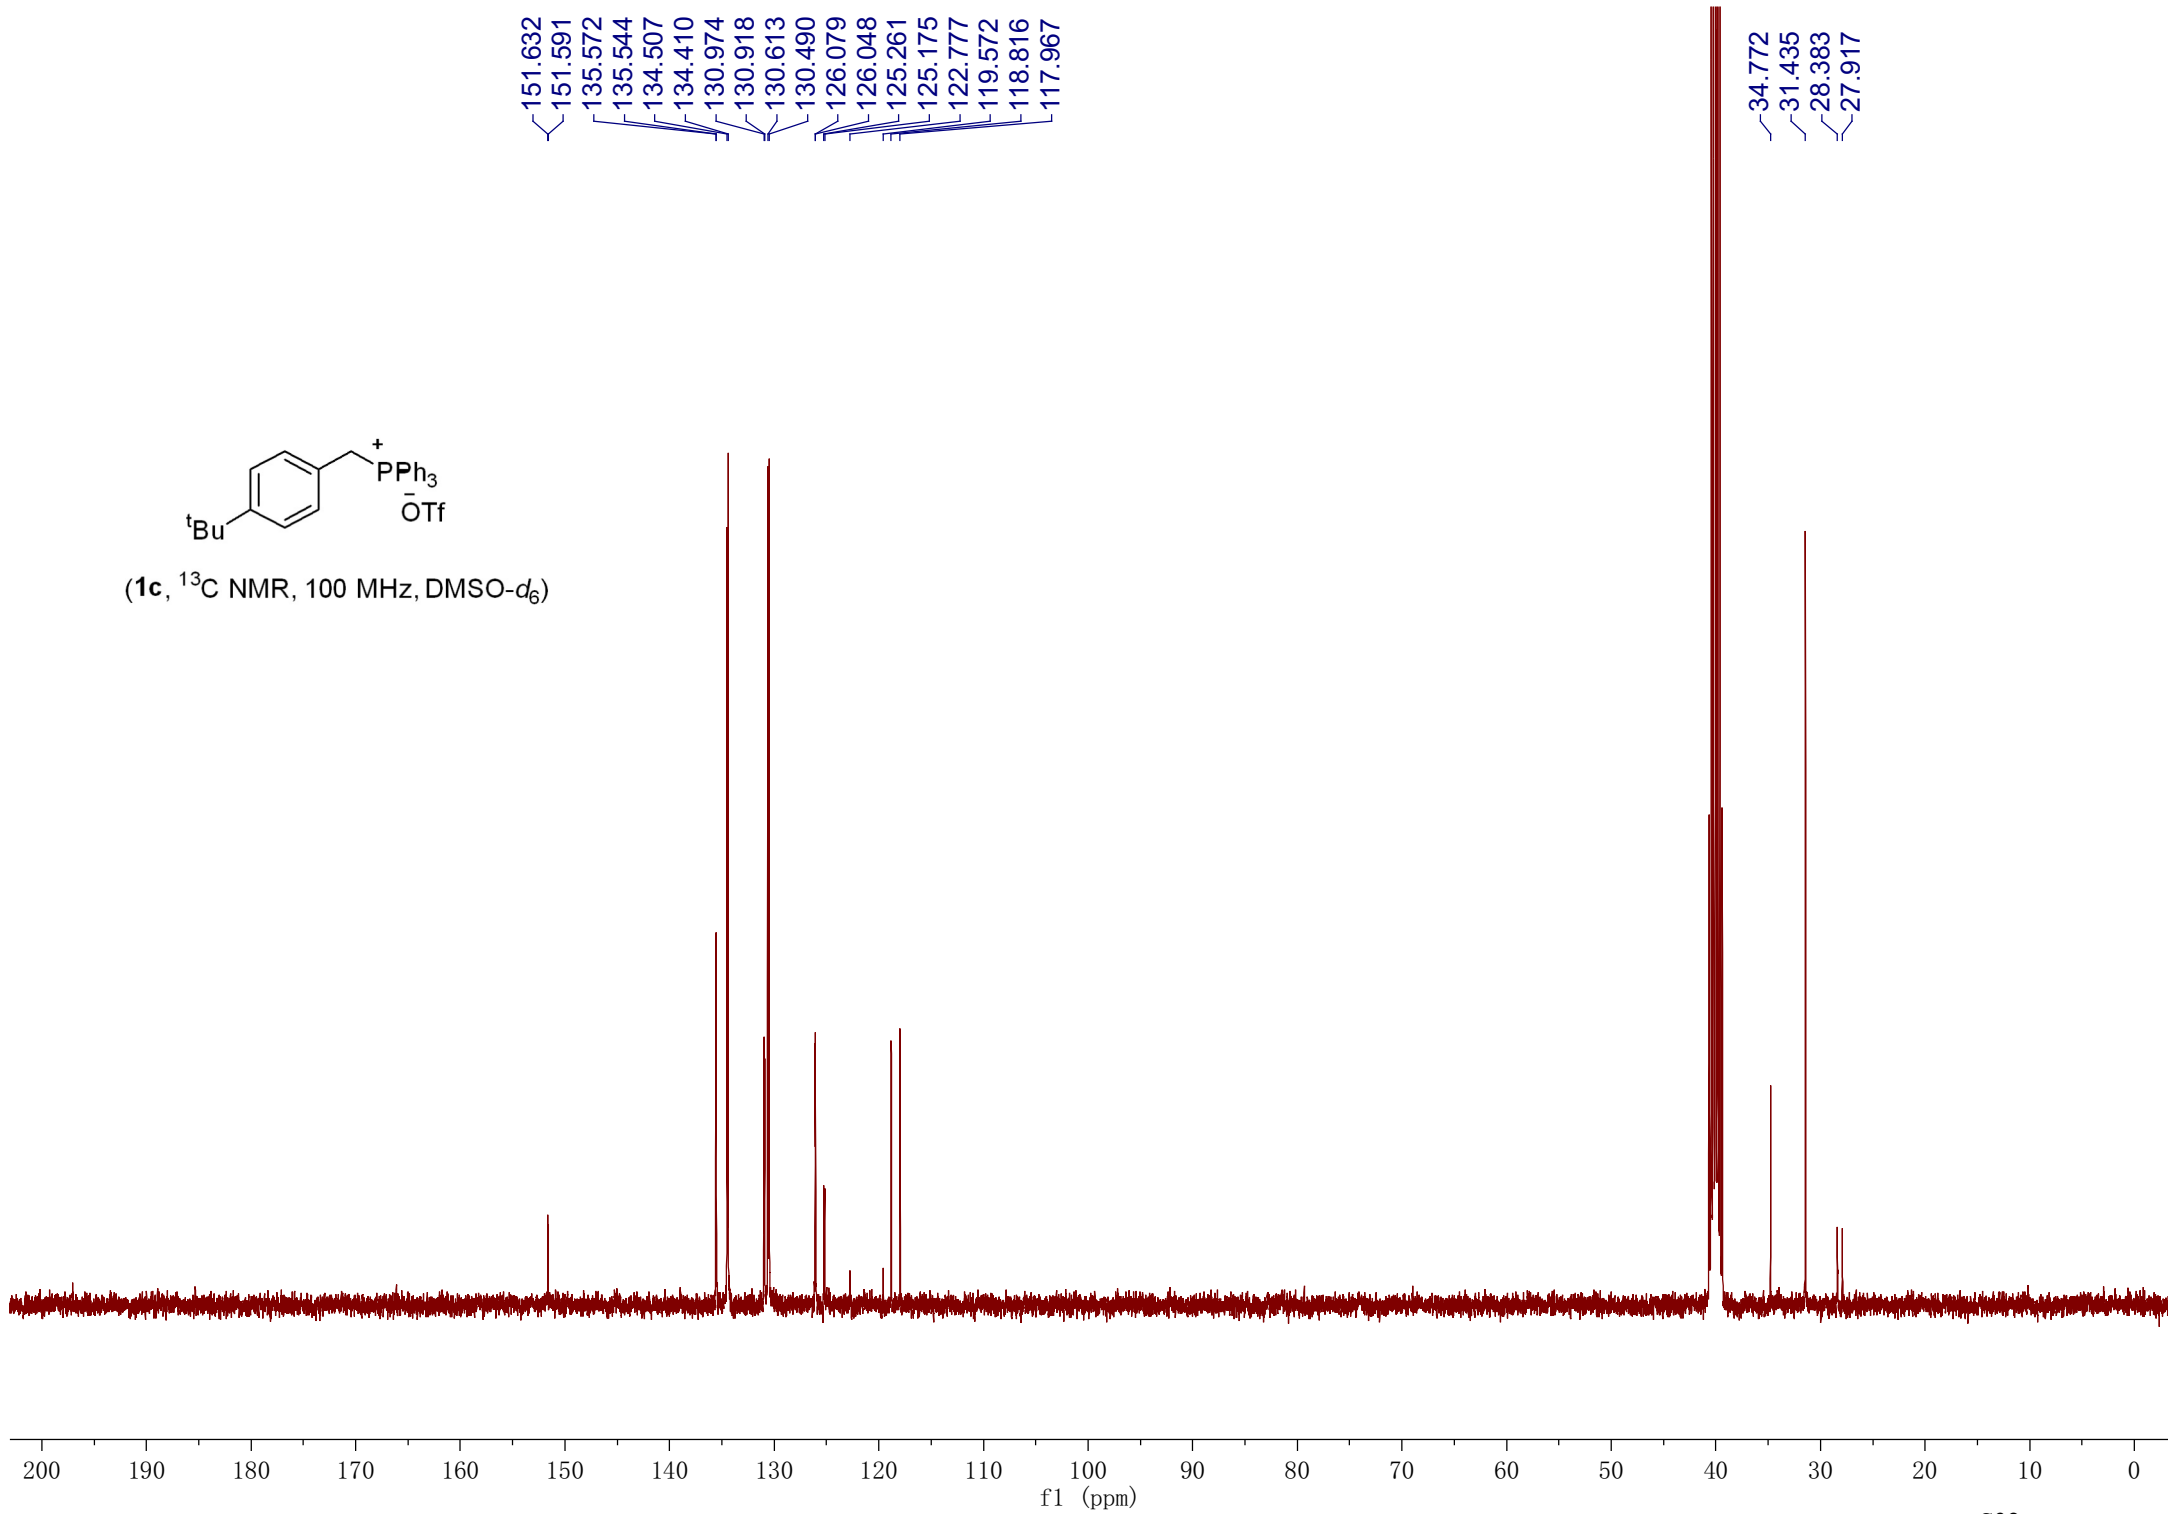



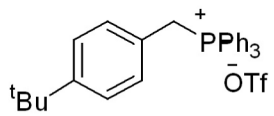

(1c,  $^{31}\text{P}$  NMR, 162 MHz,  $\text{DMSO-}d_6$ )

—23.030

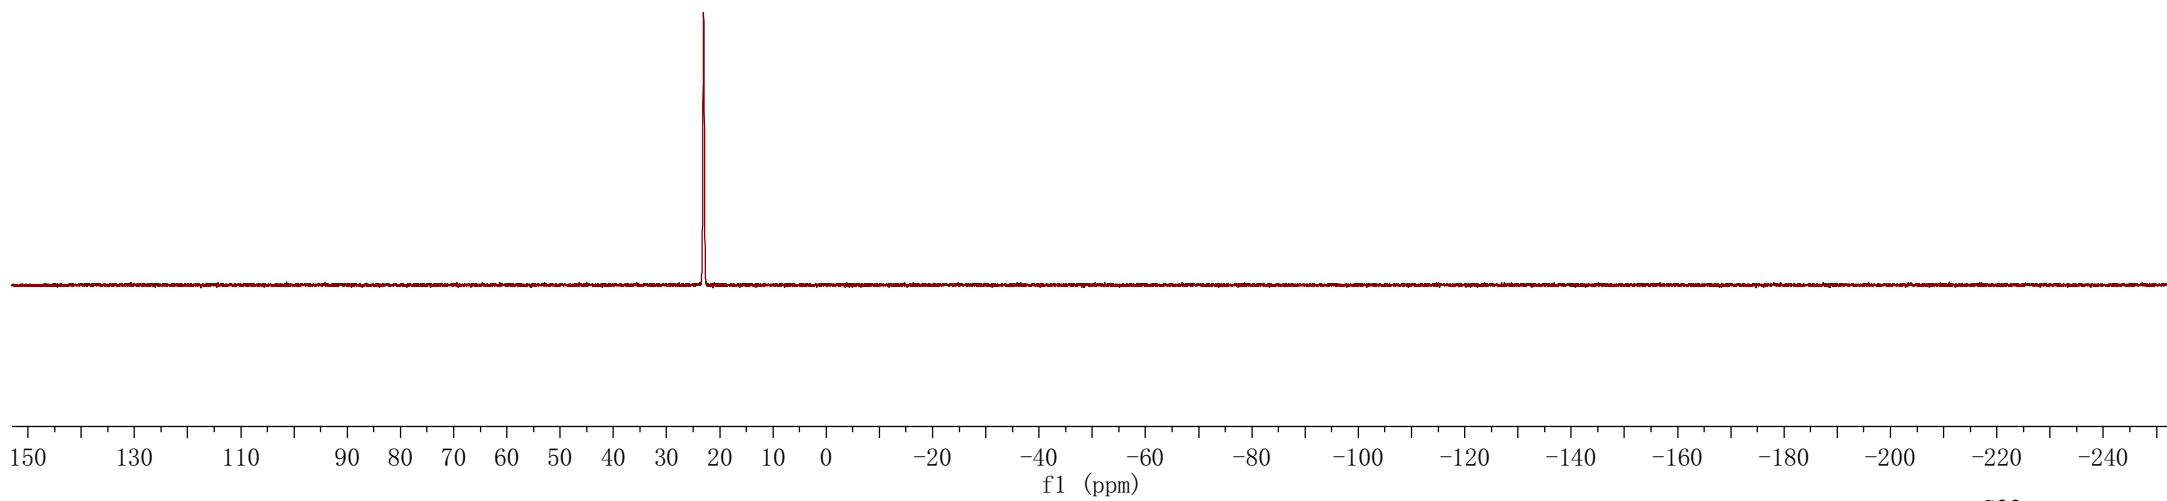

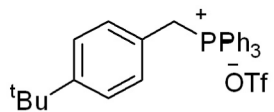

(1c,  $^{19}\text{F}$  NMR, 376 MHz, DMSO- $d_6$ )

—77.689

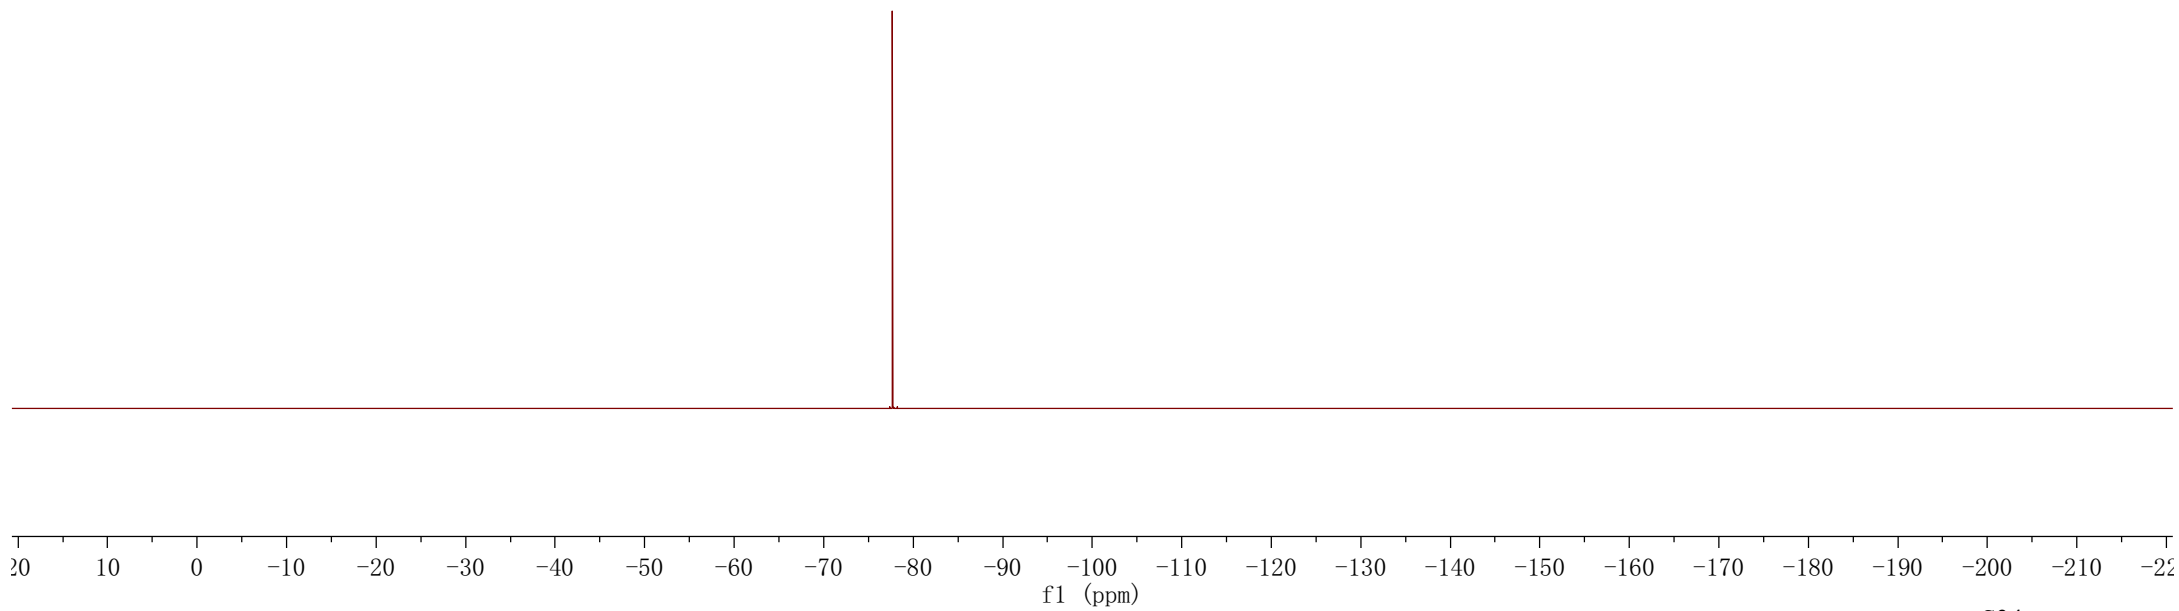

7.913  
7.910  
7.761  
7.752  
7.741  
7.732  
7.722  
7.713  
7.670  
7.650  
7.639  
7.629  
7.619  
7.010  
6.885  
6.880  
6.865  
6.860

5.111  
5.073

2.398  
2.381

1.805  
1.788  
1.771  
1.755  
1.738

0.824  
0.808

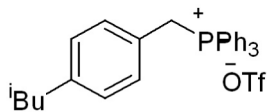

(1d, <sup>1</sup>H NMR, 400 MHz, DMSO-d<sub>6</sub>)

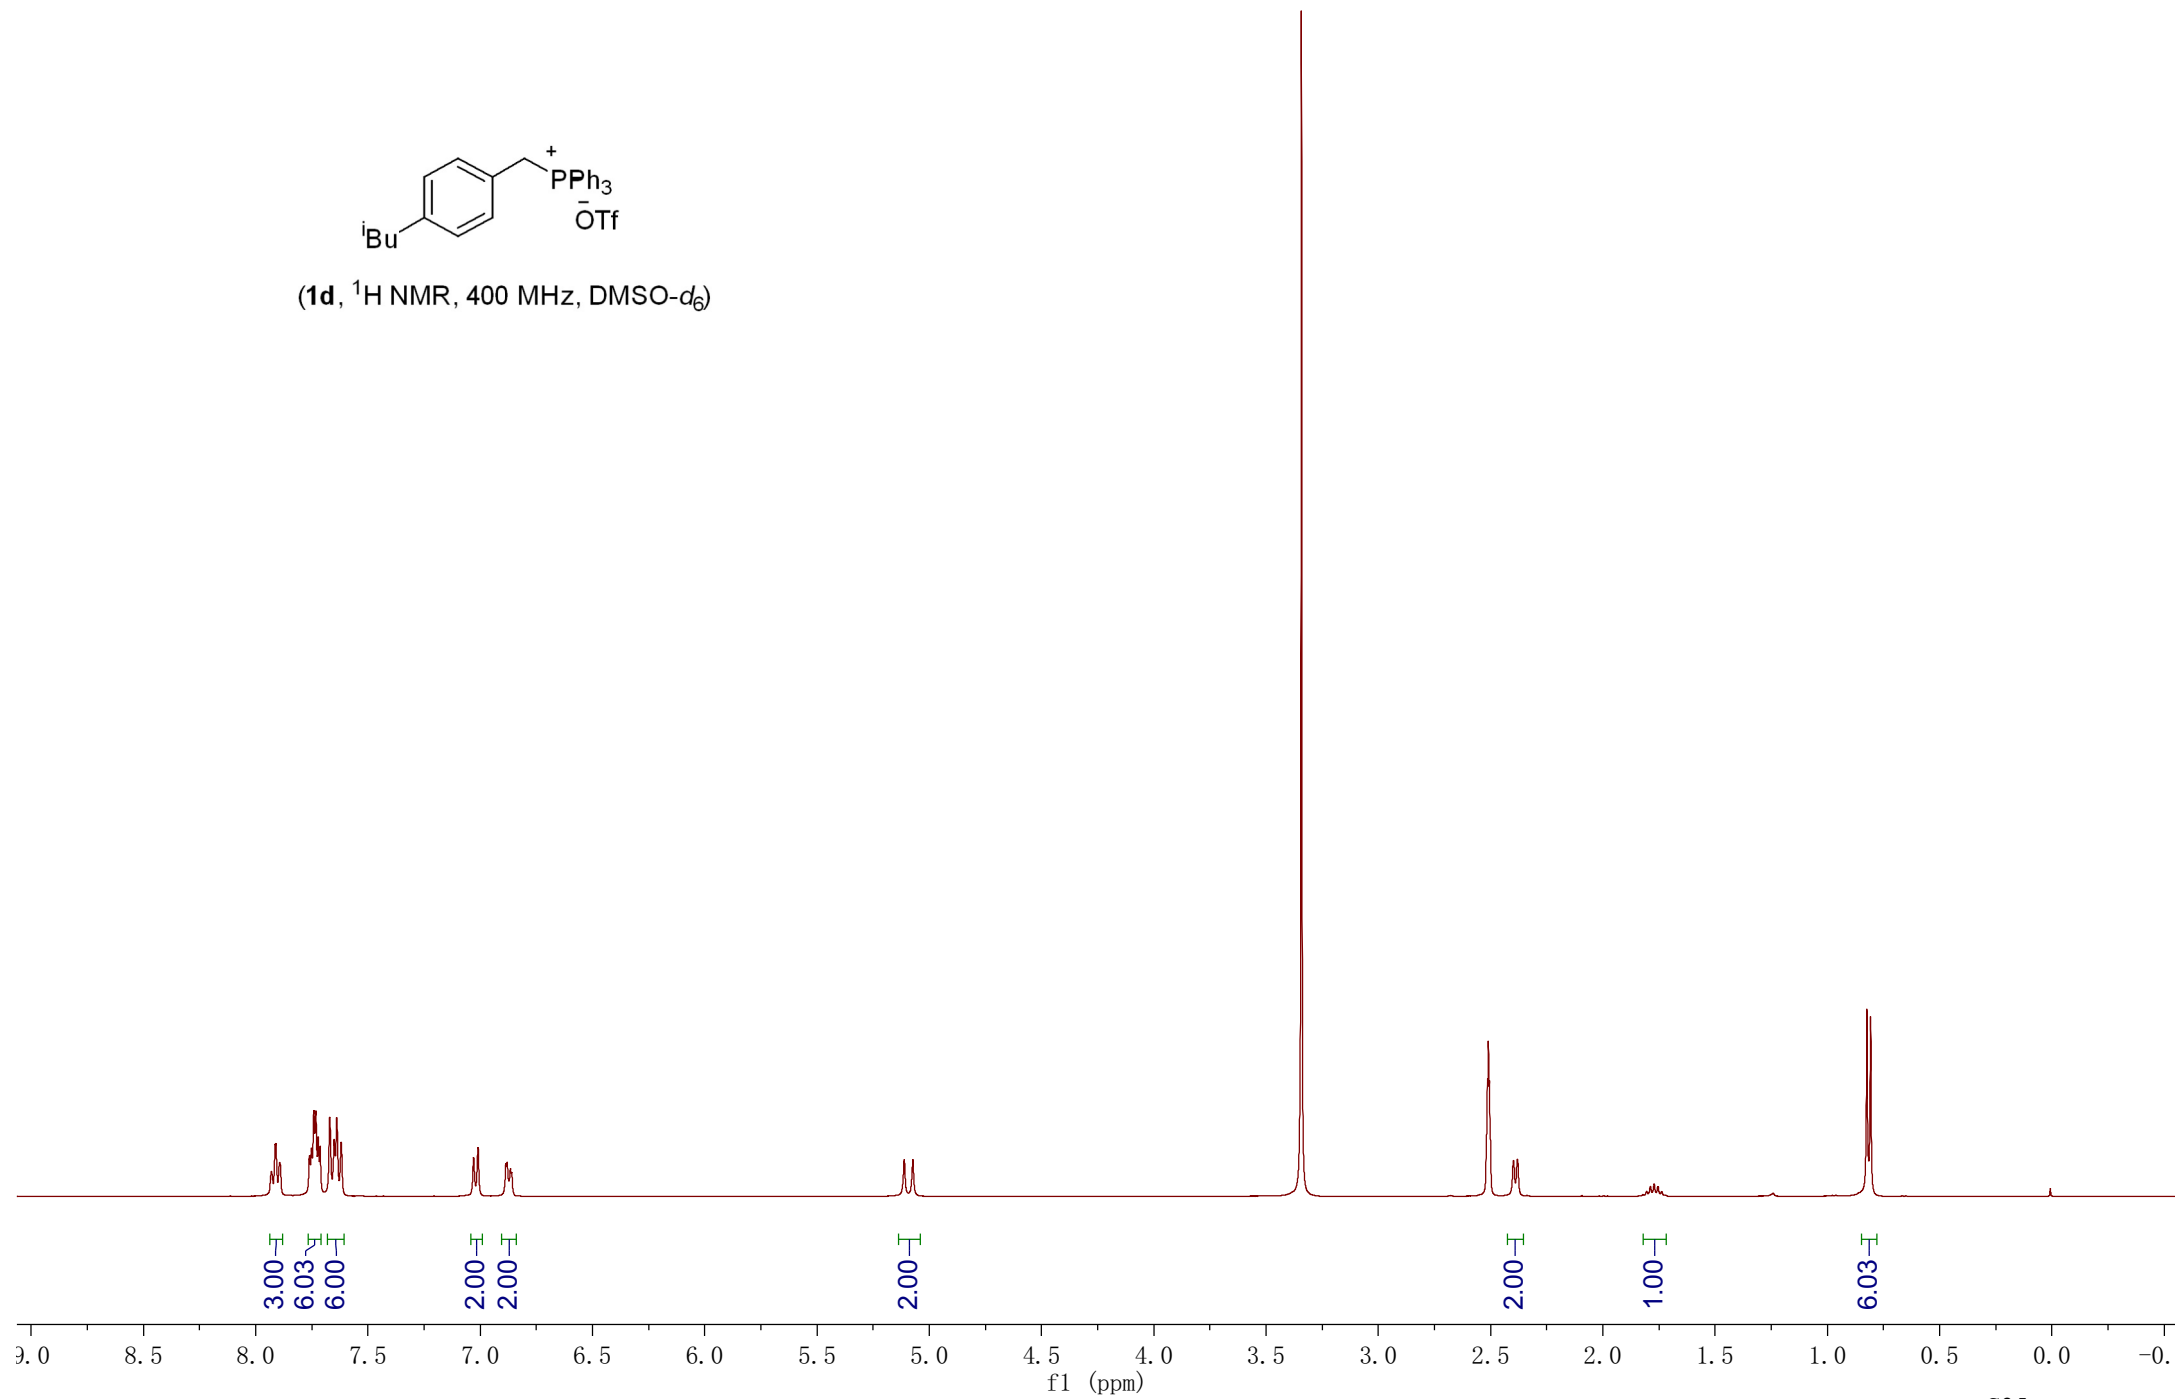

HF-Y-1d-C  
HF-Y-1d-C

142.420  
142.379  
136.016  
135.990  
134.964  
134.867  
131.493  
131.438  
131.042  
130.918  
130.319  
130.288  
125.969  
125.885  
123.226  
120.023  
119.216  
118.368

44.907

30.364  
28.979  
28.517  
22.881

3.8E+08  
3.6E+08  
3.4E+08  
3.2E+08  
3.0E+08  
2.8E+08  
2.6E+08  
2.4E+08  
2.2E+08  
2.0E+08  
1.8E+08  
1.6E+08  
1.4E+08  
1.2E+08  
1.0E+08  
8.0E+07  
6.0E+07  
4.0E+07  
2.0E+07  
0.0E+00  
-2.0E+07

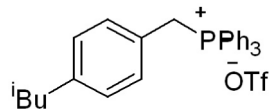

(1d, <sup>13</sup>C NMR, 100 MHz, DMSO-*d*<sub>6</sub>)

210 200 190 180 170 160 150 140 130 120 110 100 90 80 70 60 50 40 30 20 10 0 -10  
f1 (ppm)

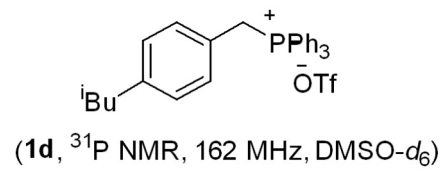

—22.994

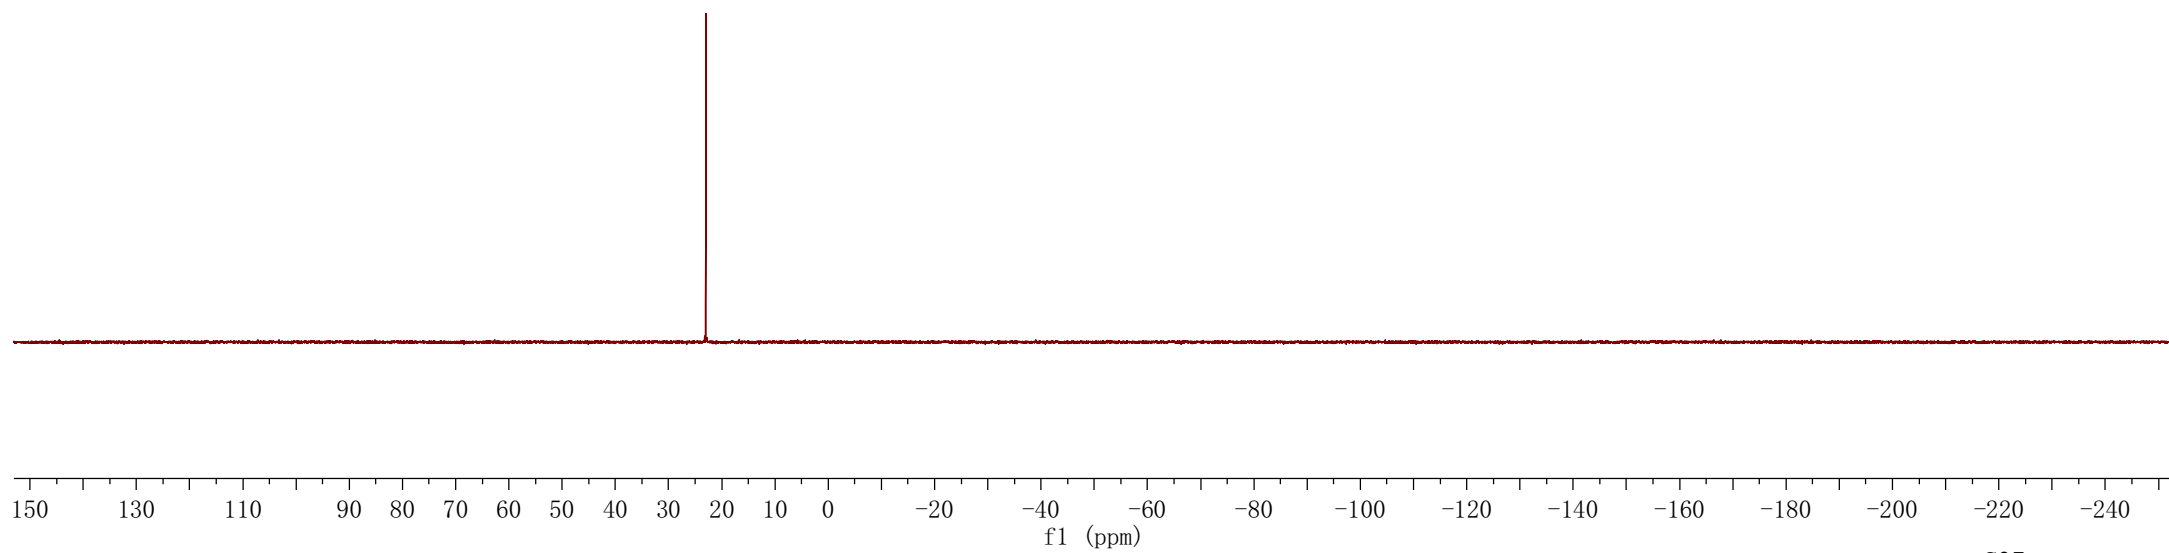

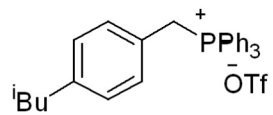

(1d,  $^{19}\text{F}$  NMR, 376 MHz, DMSO- $d_6$ )

— -77.740

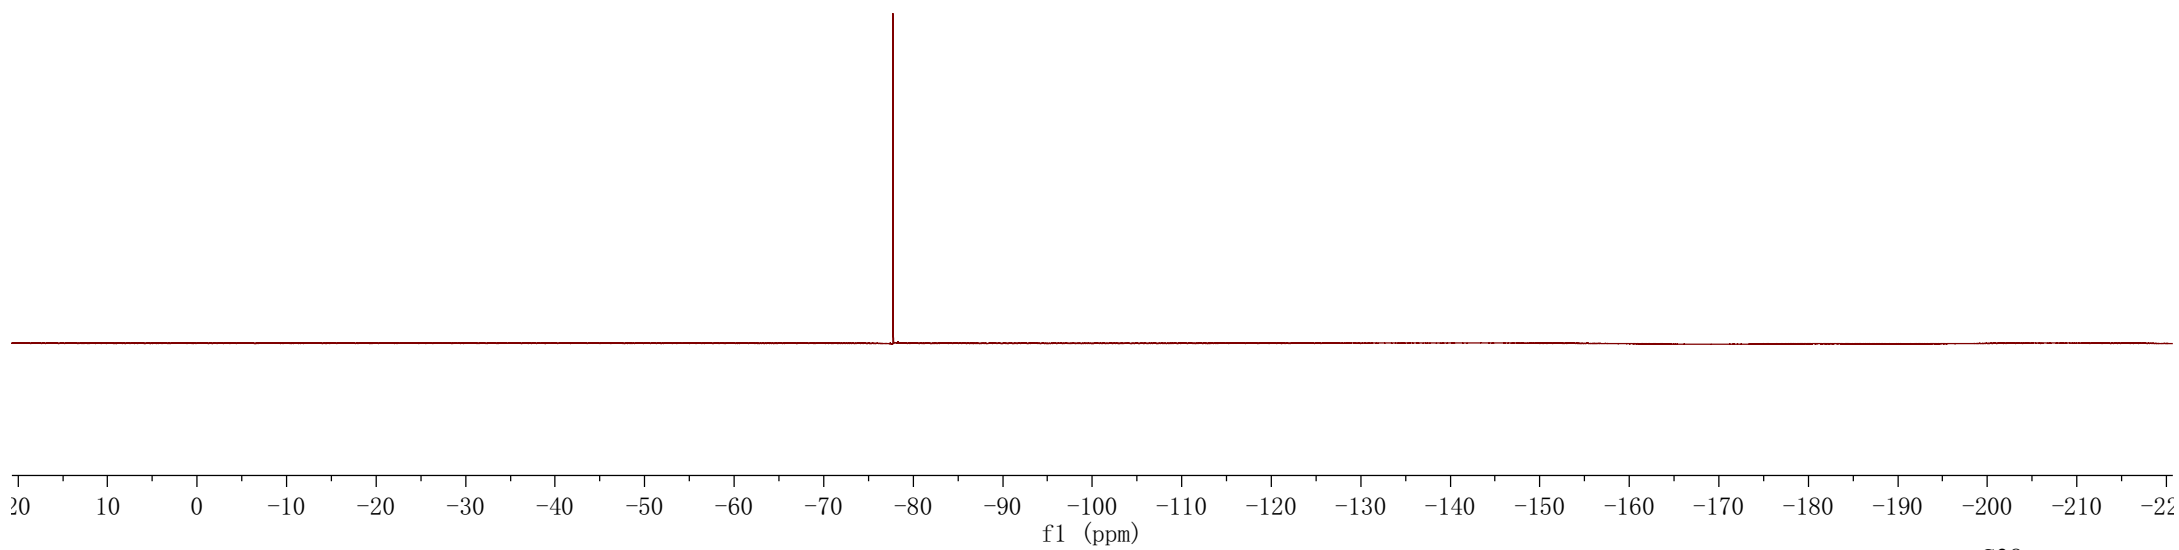

7.921  
7.902  
7.885  
7.771  
7.762  
7.751  
7.742  
7.732  
7.723  
7.681  
7.662  
7.650  
7.631  
6.901  
6.895  
6.879  
6.873  
6.806  
6.784

5.070  
5.033

3.689

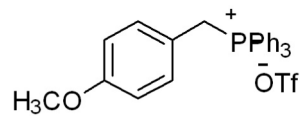

(**1e**, <sup>1</sup>H NMR, 400 MHz, DMSO-*d*<sub>6</sub>)

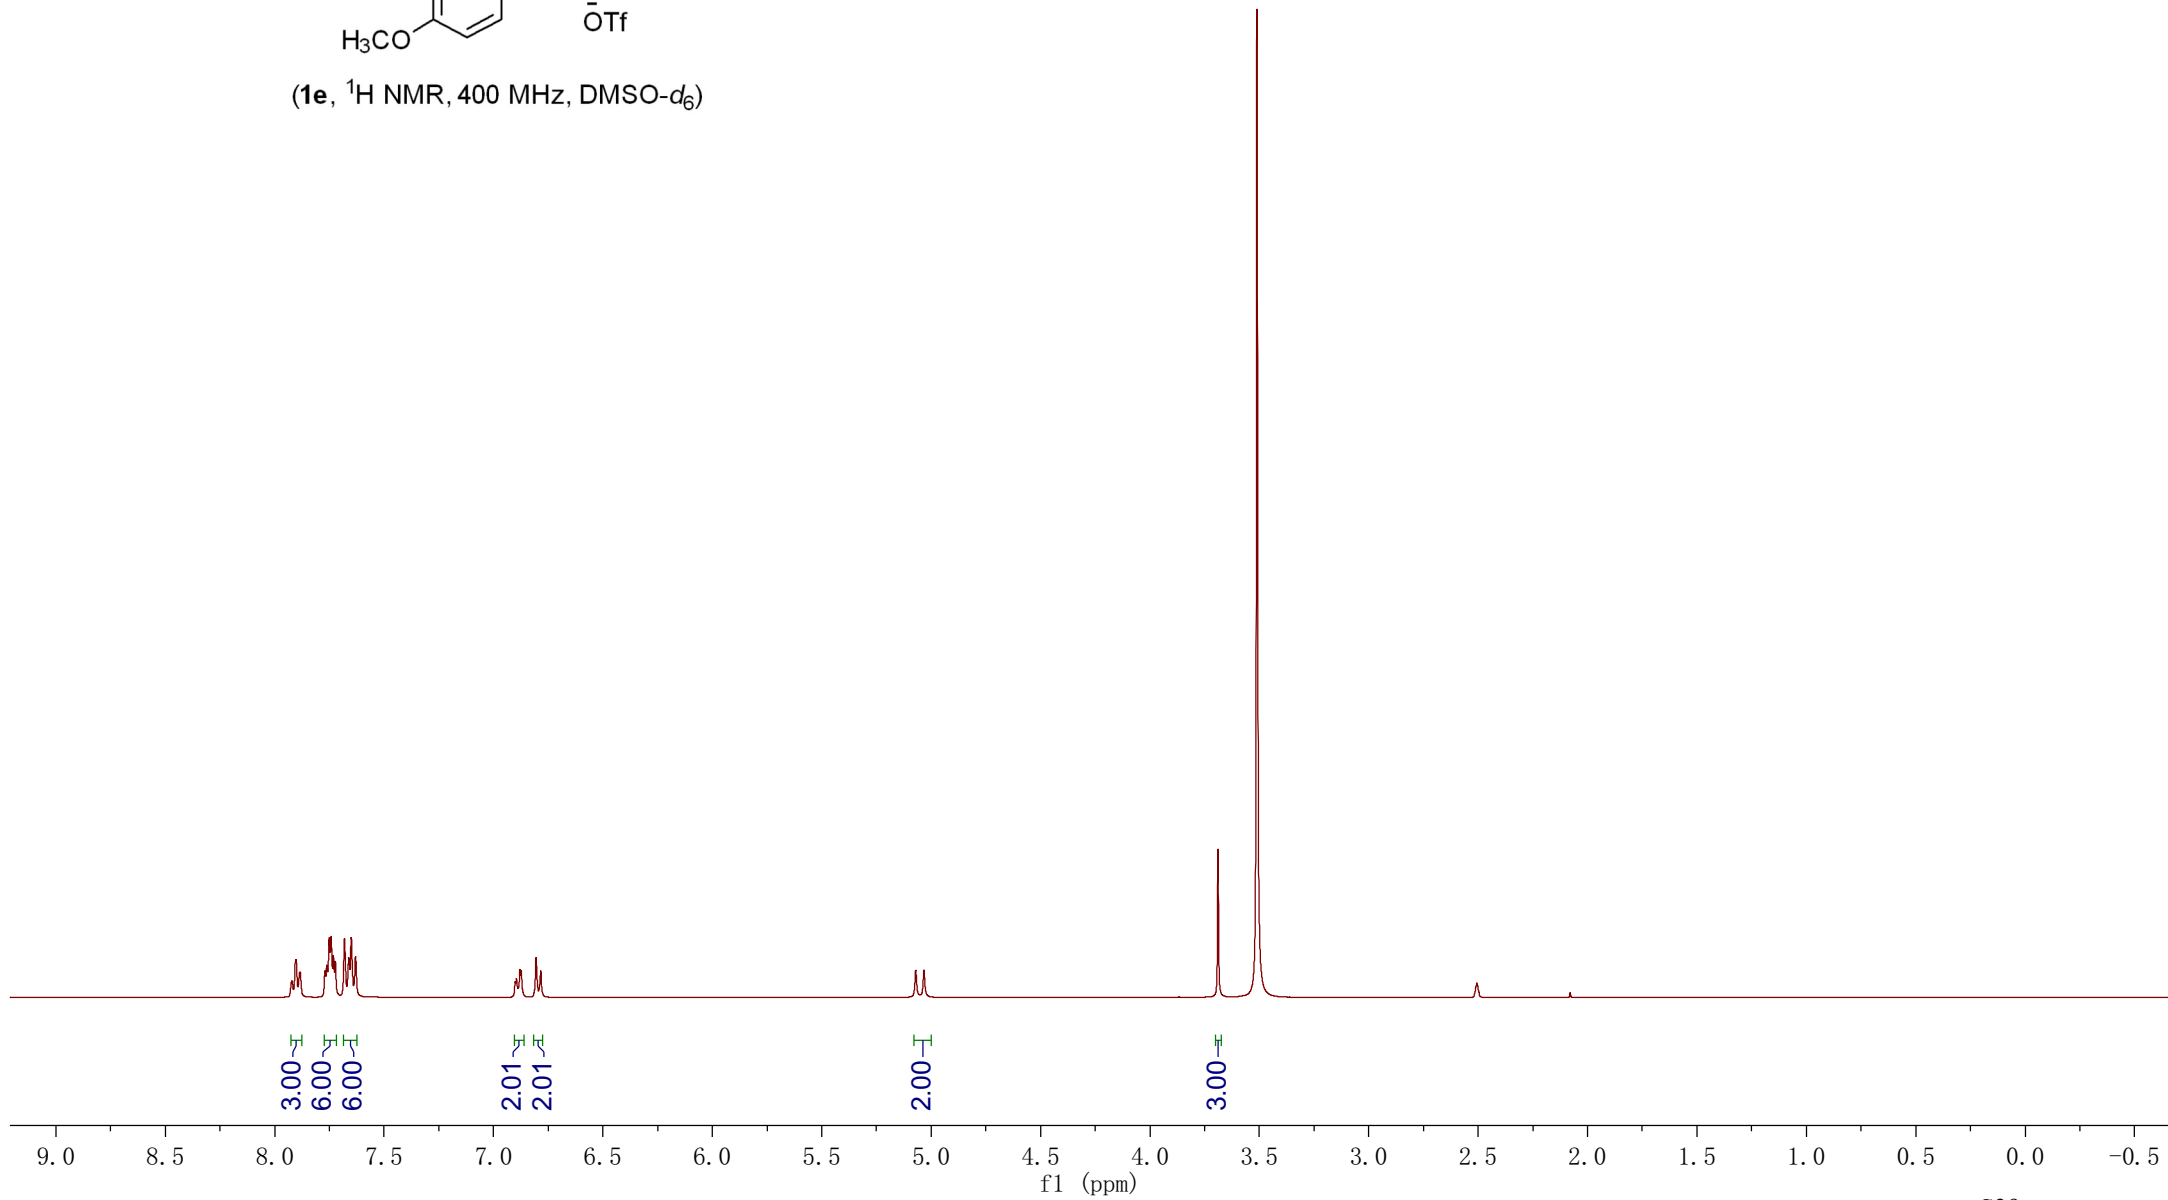

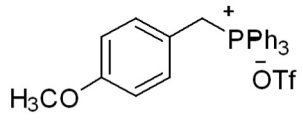

(1e, <sup>13</sup>C NMR, 100 MHz, DMSO-d<sub>6</sub>)

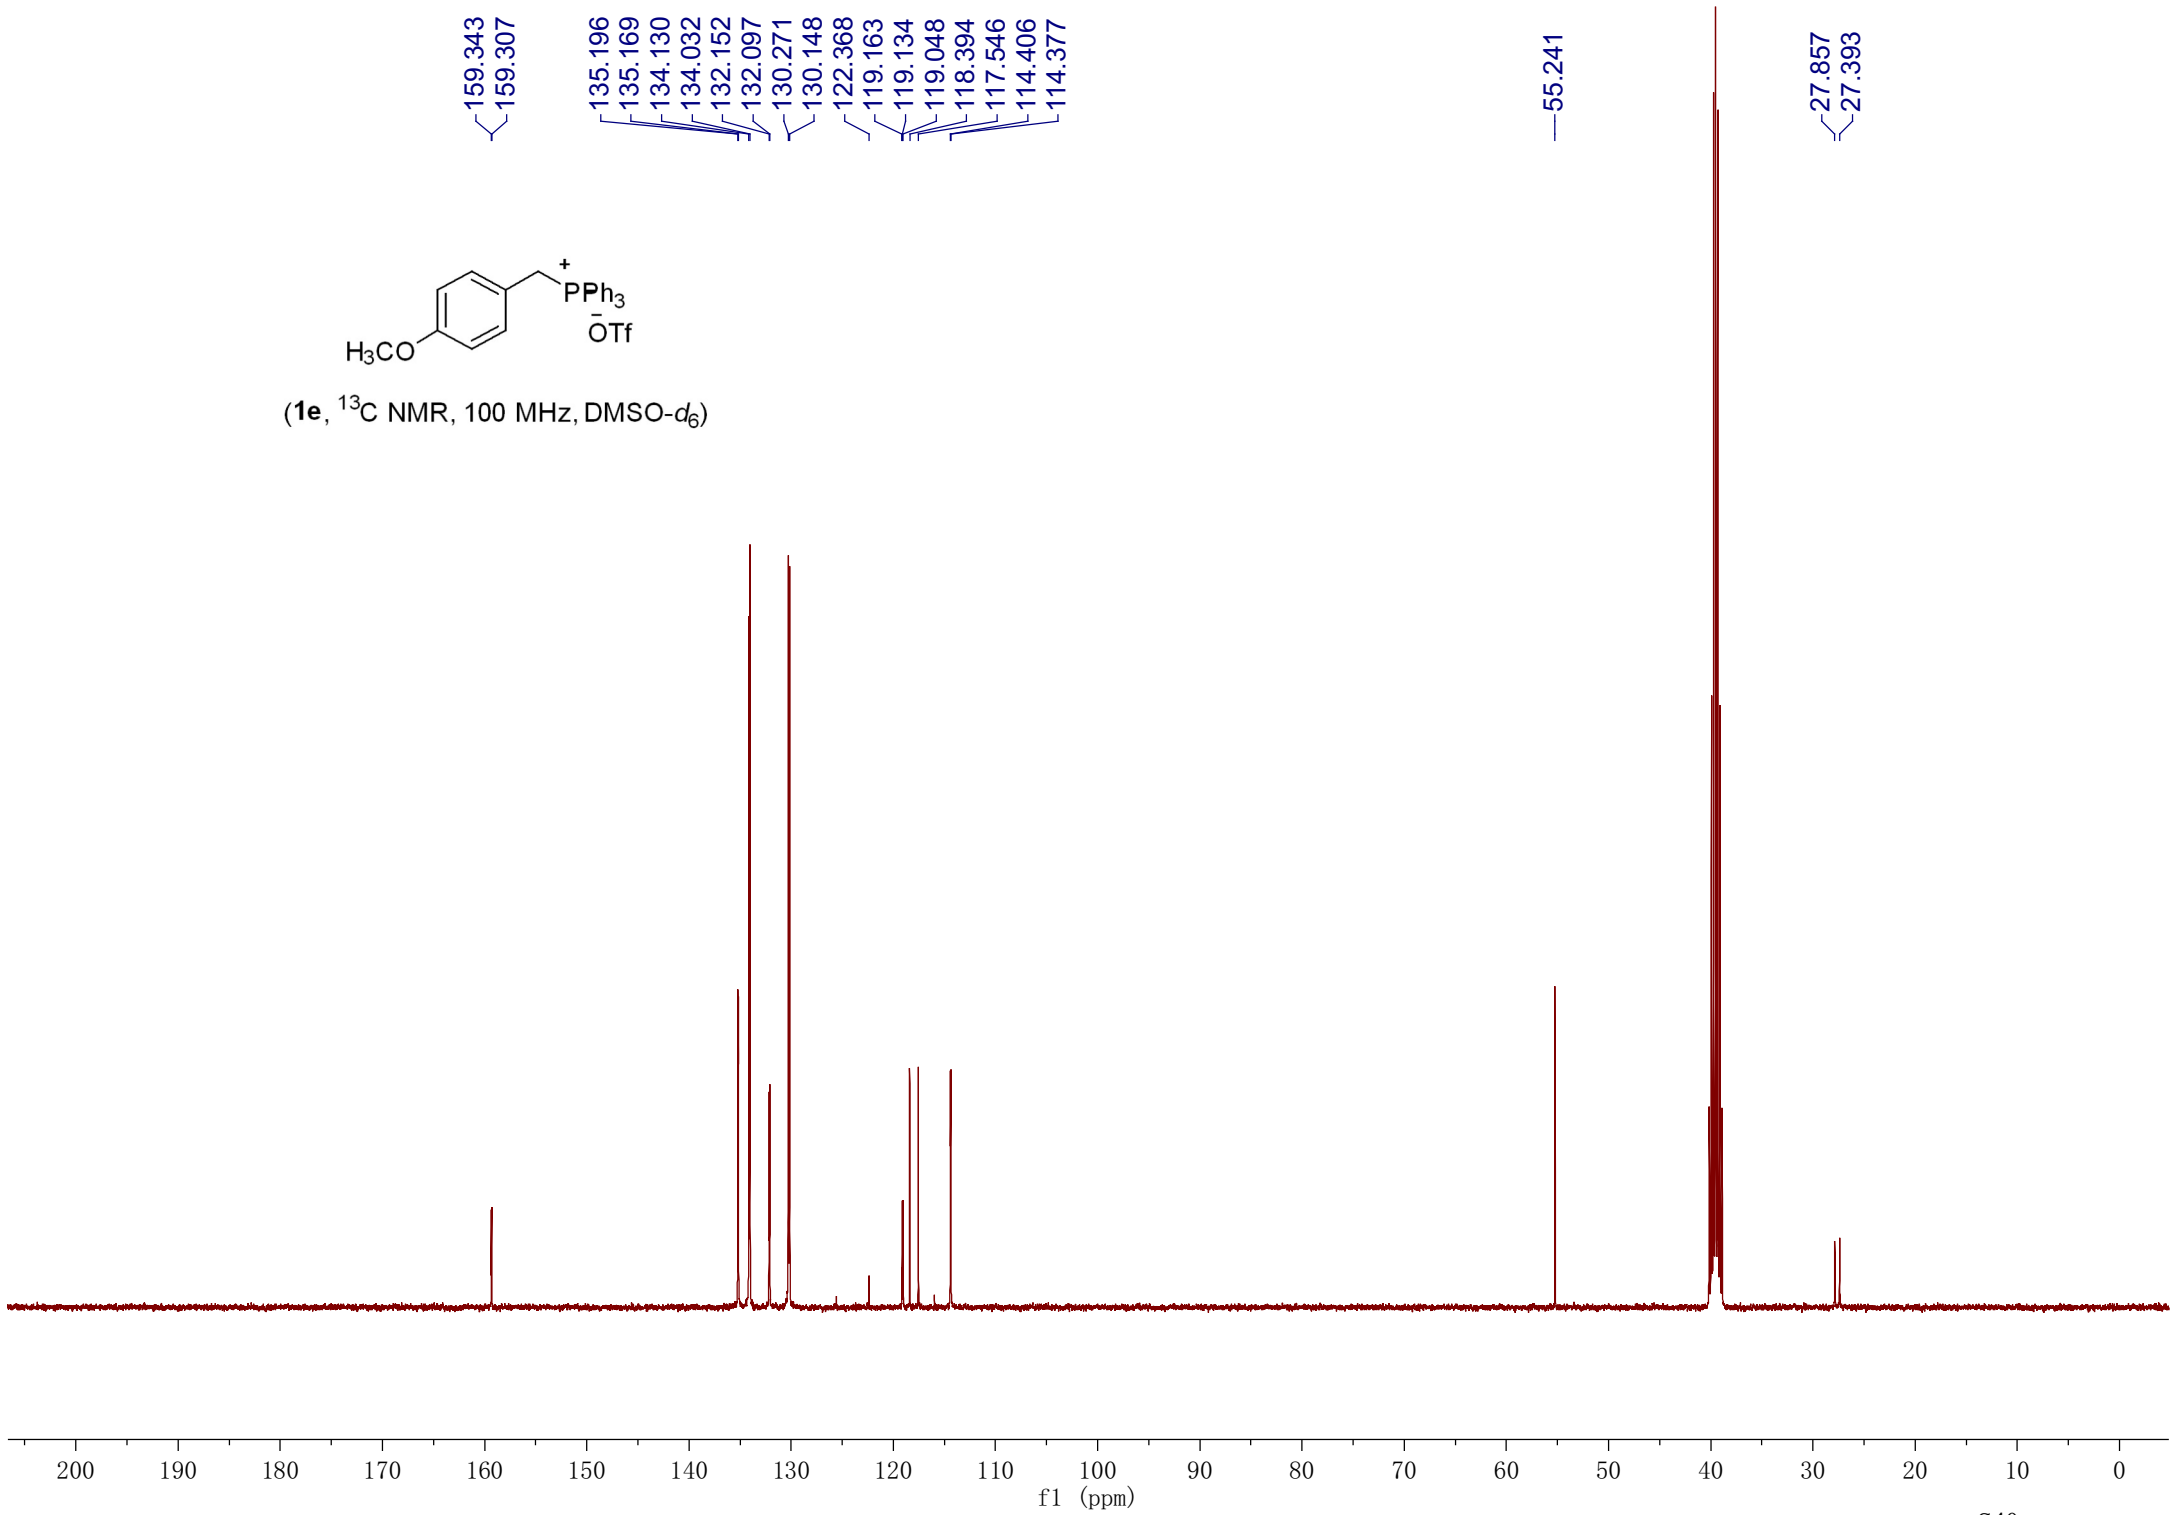



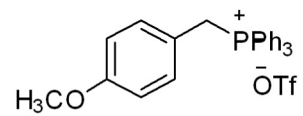

(1e,  $^{31}\text{P}$  NMR, 162 MHz,  $\text{DMSO-}d_6$ )

—22.320

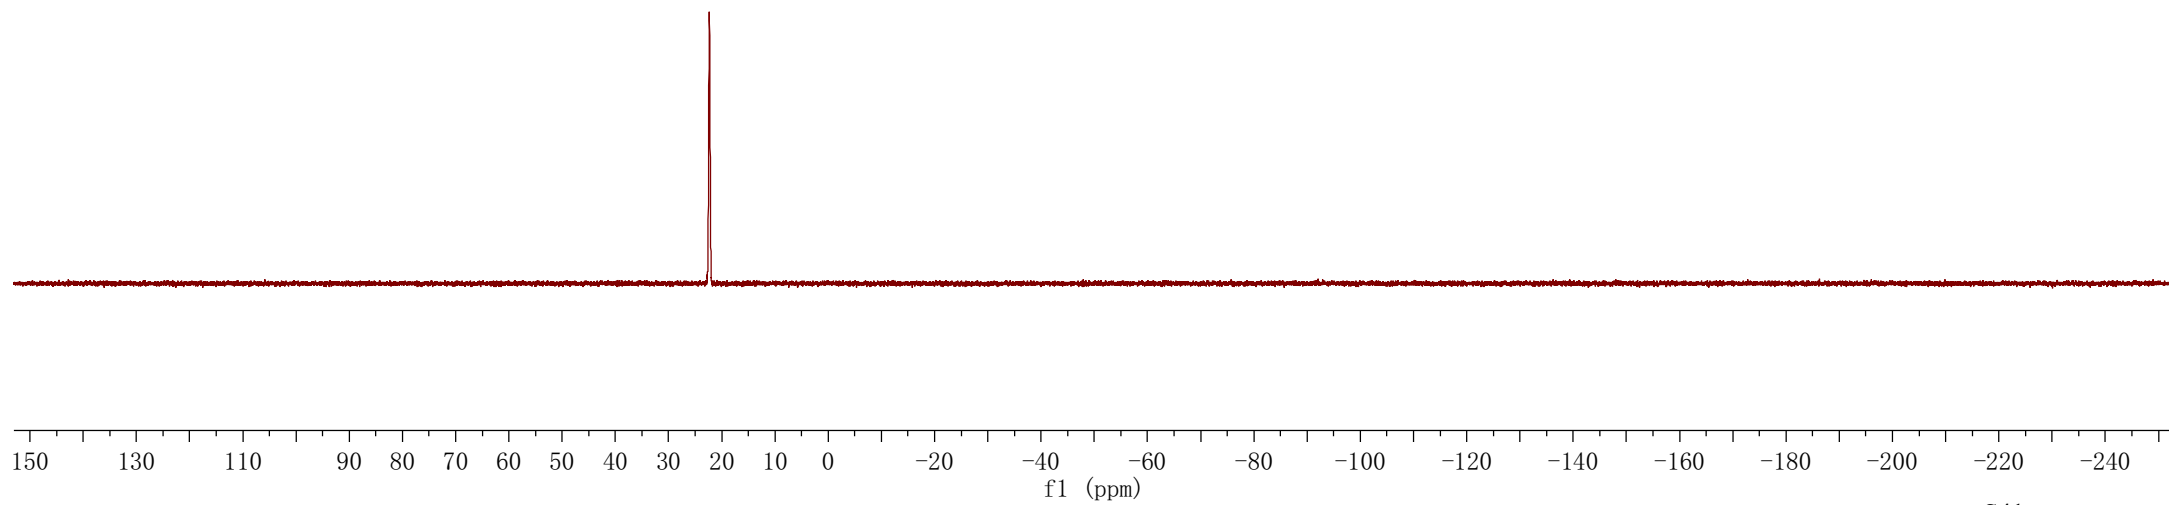

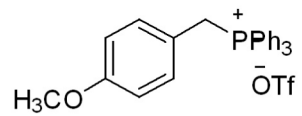

(**1e**, <sup>19</sup>F NMR, 376 MHz, DMSO-*d*<sub>6</sub>)

-77.741

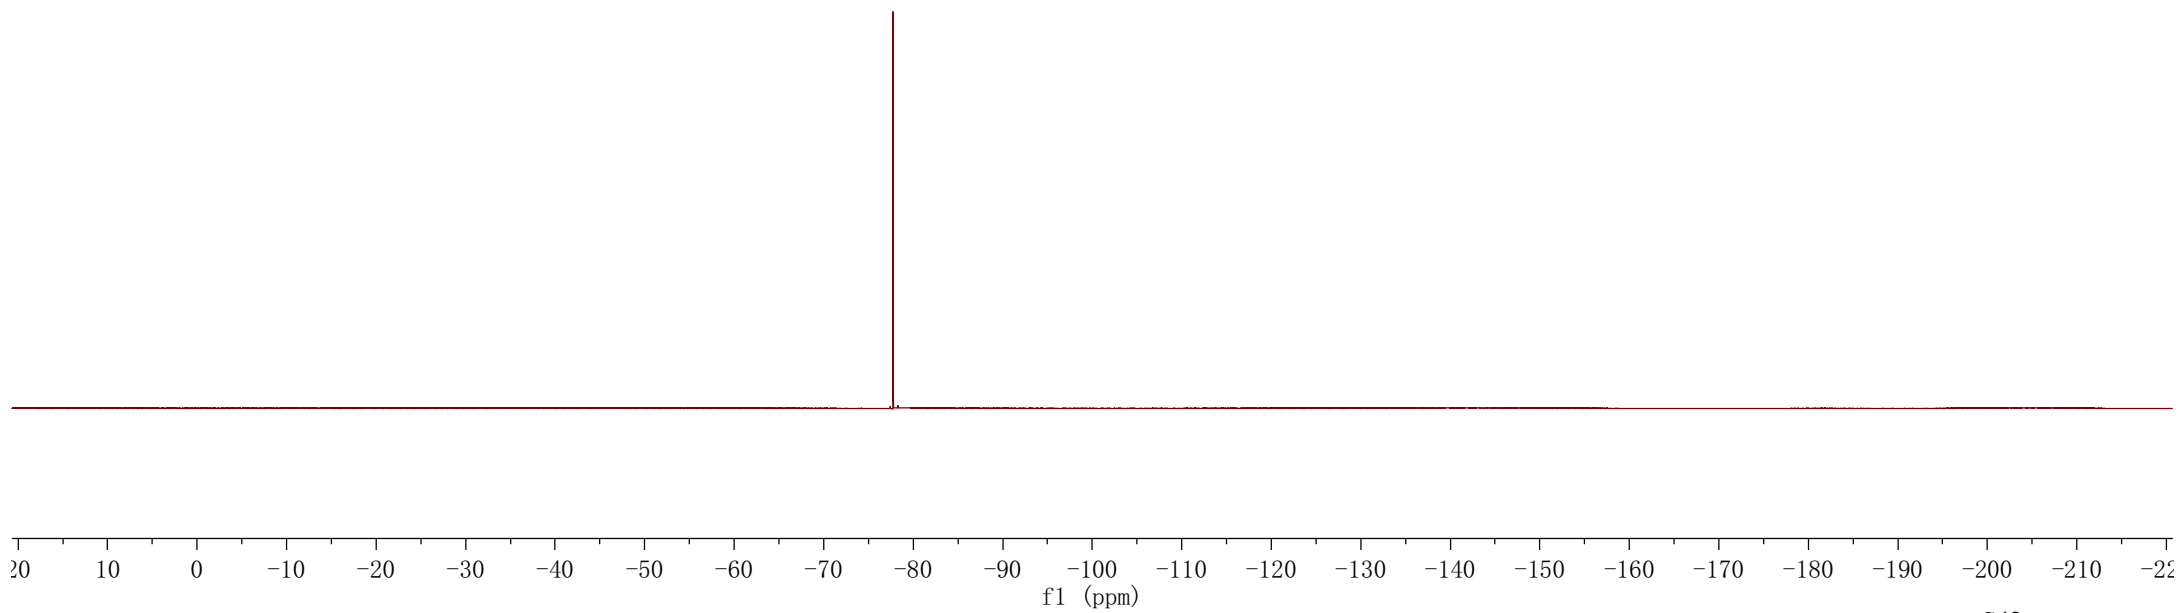

7.916  
7.912  
7.783  
7.774  
7.763  
7.754  
7.744  
7.735  
7.699  
7.681  
7.678  
7.668  
7.659  
7.653  
7.102  
7.080  
7.021  
7.015  
7.008  
7.001  
6.993  
6.986  
6.980

5.164  
5.125

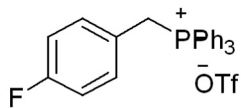

(1f, <sup>1</sup>H NMR, 400 MHz, DMSO-d<sub>6</sub>)

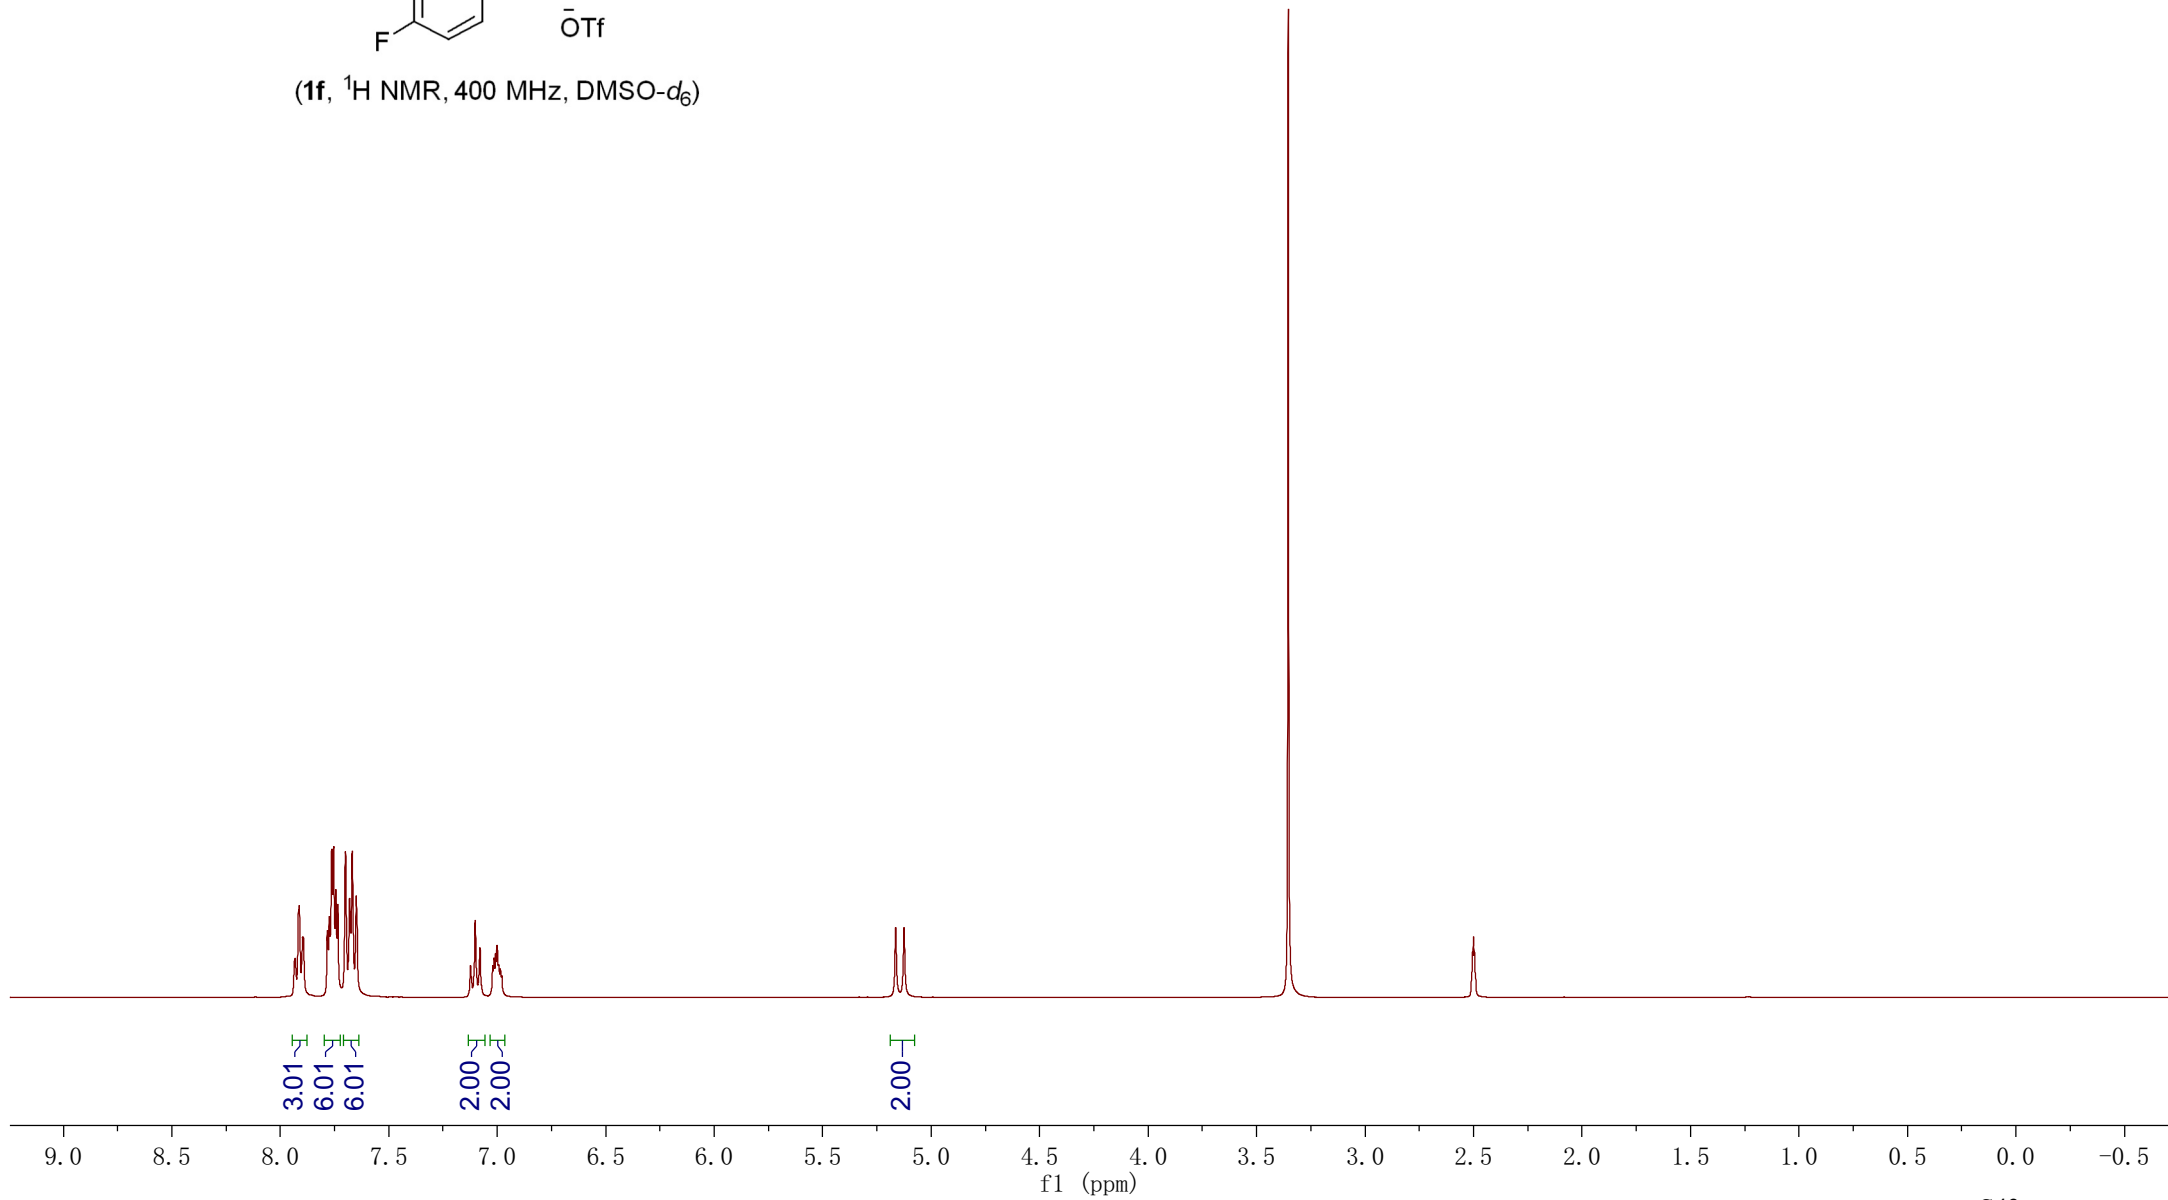

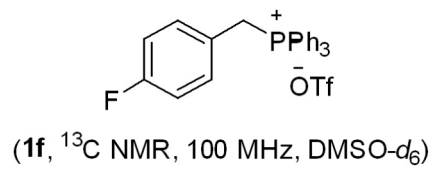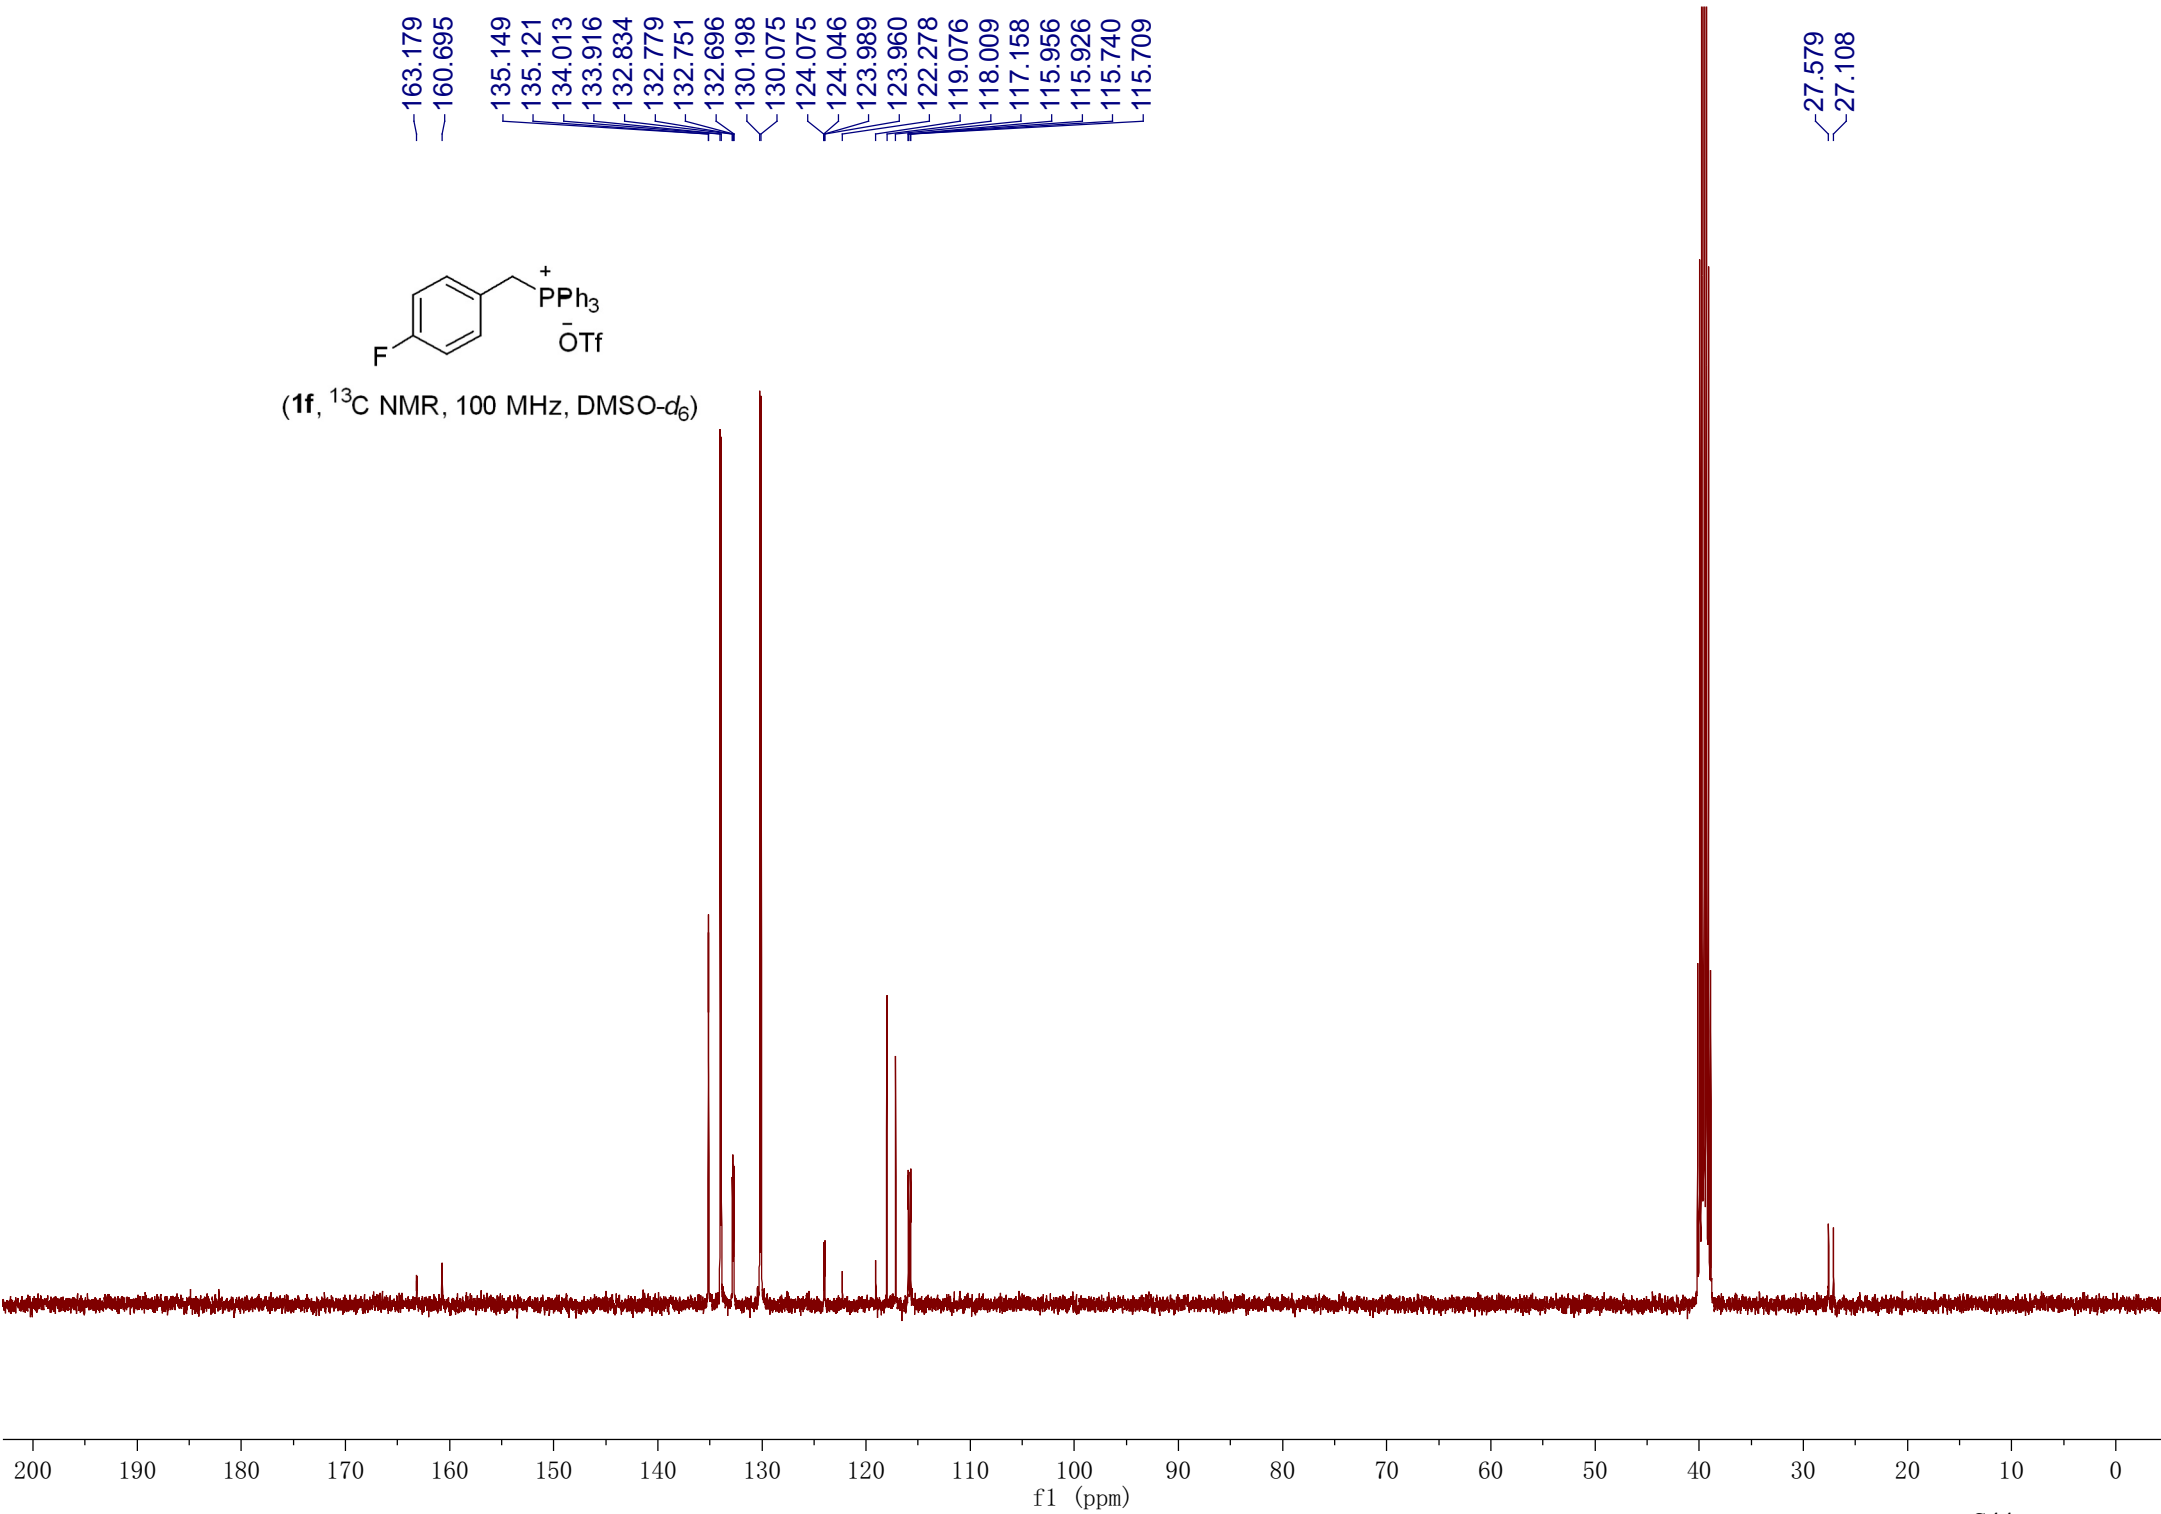

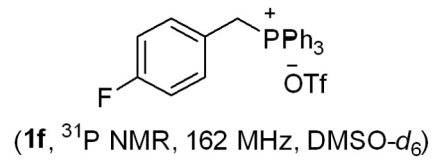

—23.077

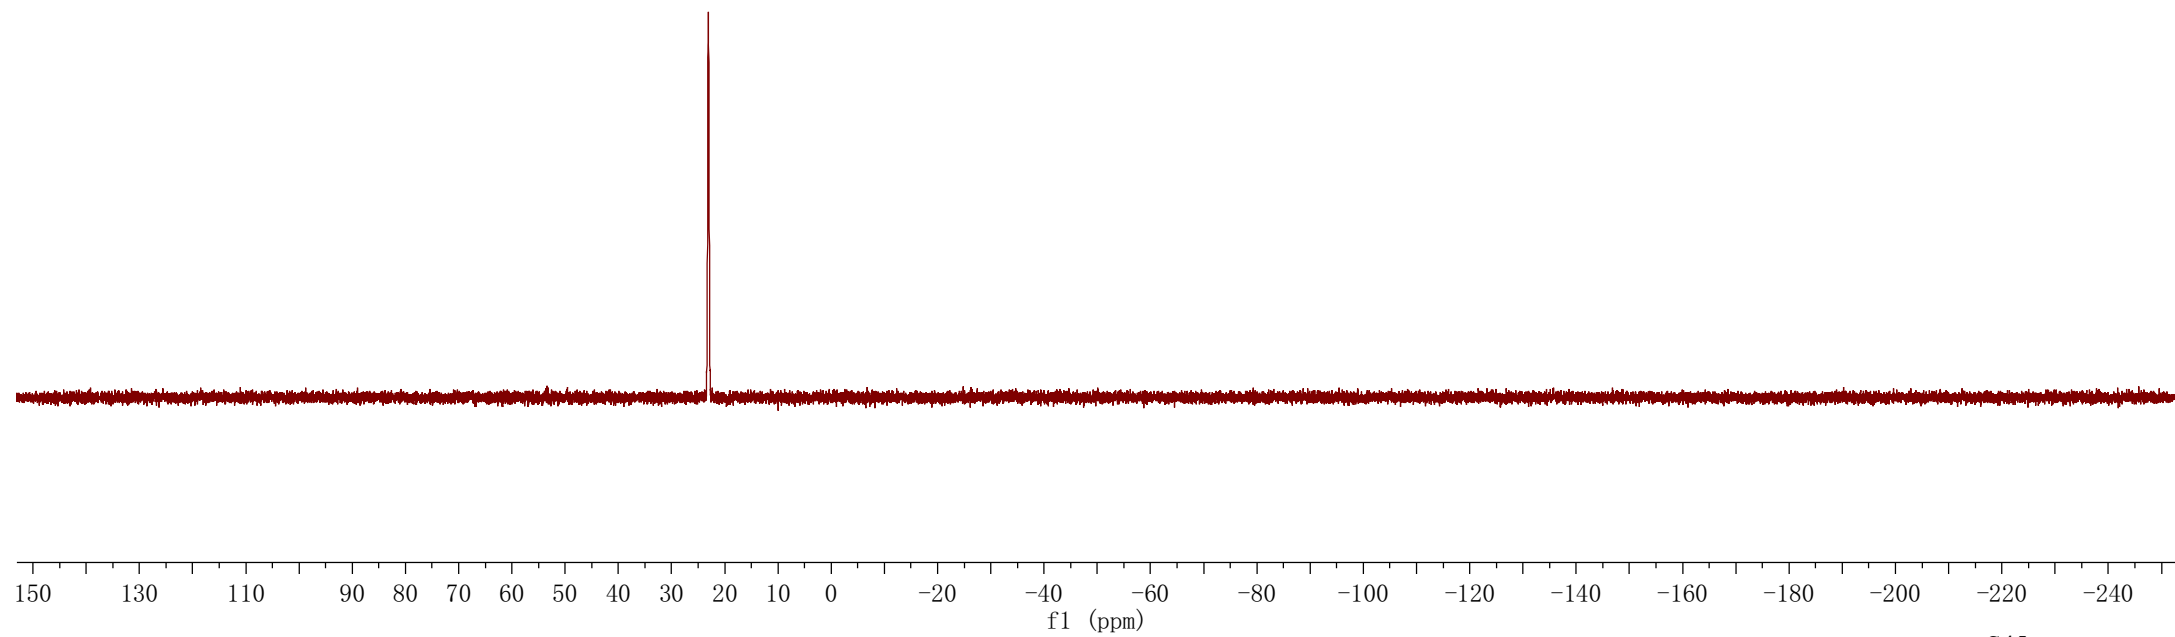

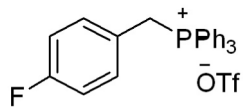

(1f,  $^{19}\text{F}$  NMR, 376 MHz, DMSO- $d_6$ )

---77.725

---113.137

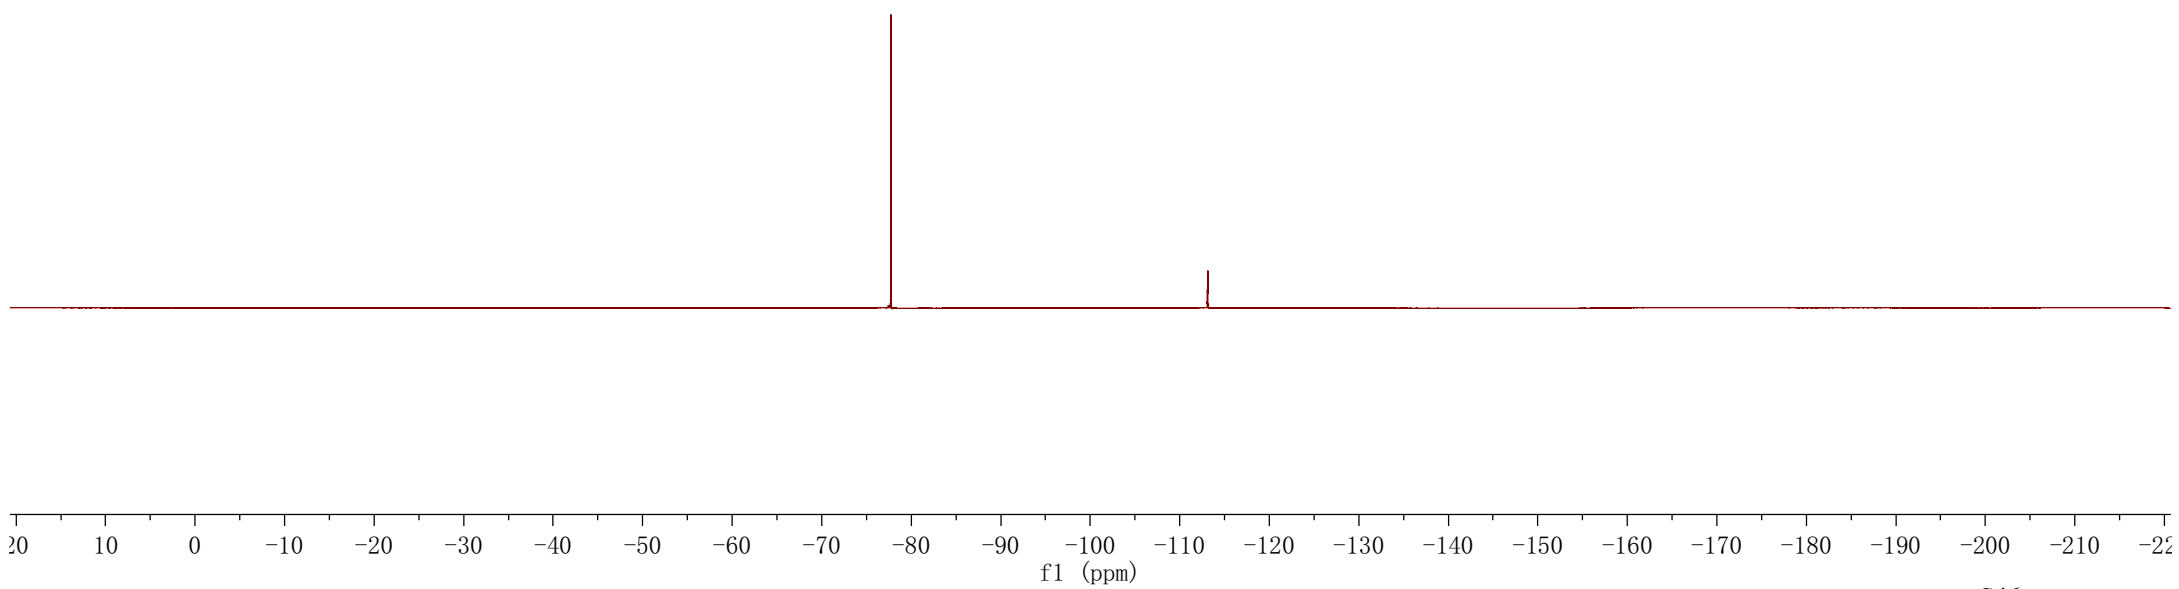

7.933  
7.916  
7.899  
7.769  
7.761  
7.752  
7.742  
7.728  
7.698  
7.678  
7.334  
7.314  
7.009  
6.992

5.202  
5.162

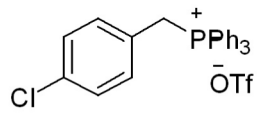

(1g, <sup>1</sup>H NMR, 400 MHz, DMSO-*d*<sub>6</sub>)

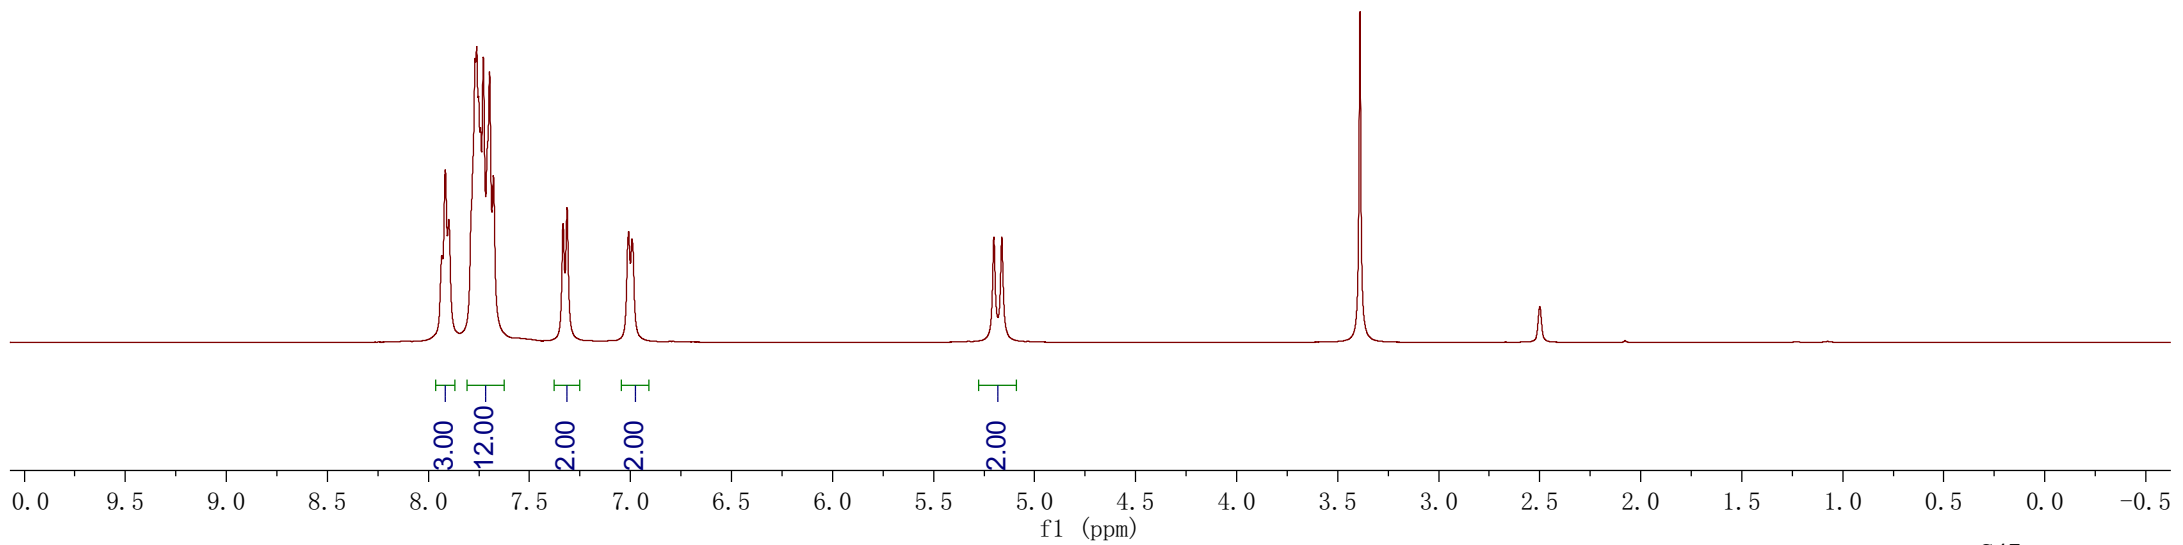

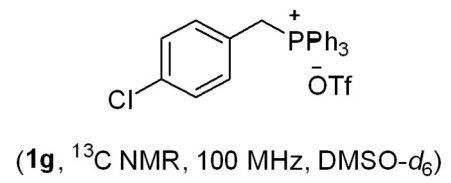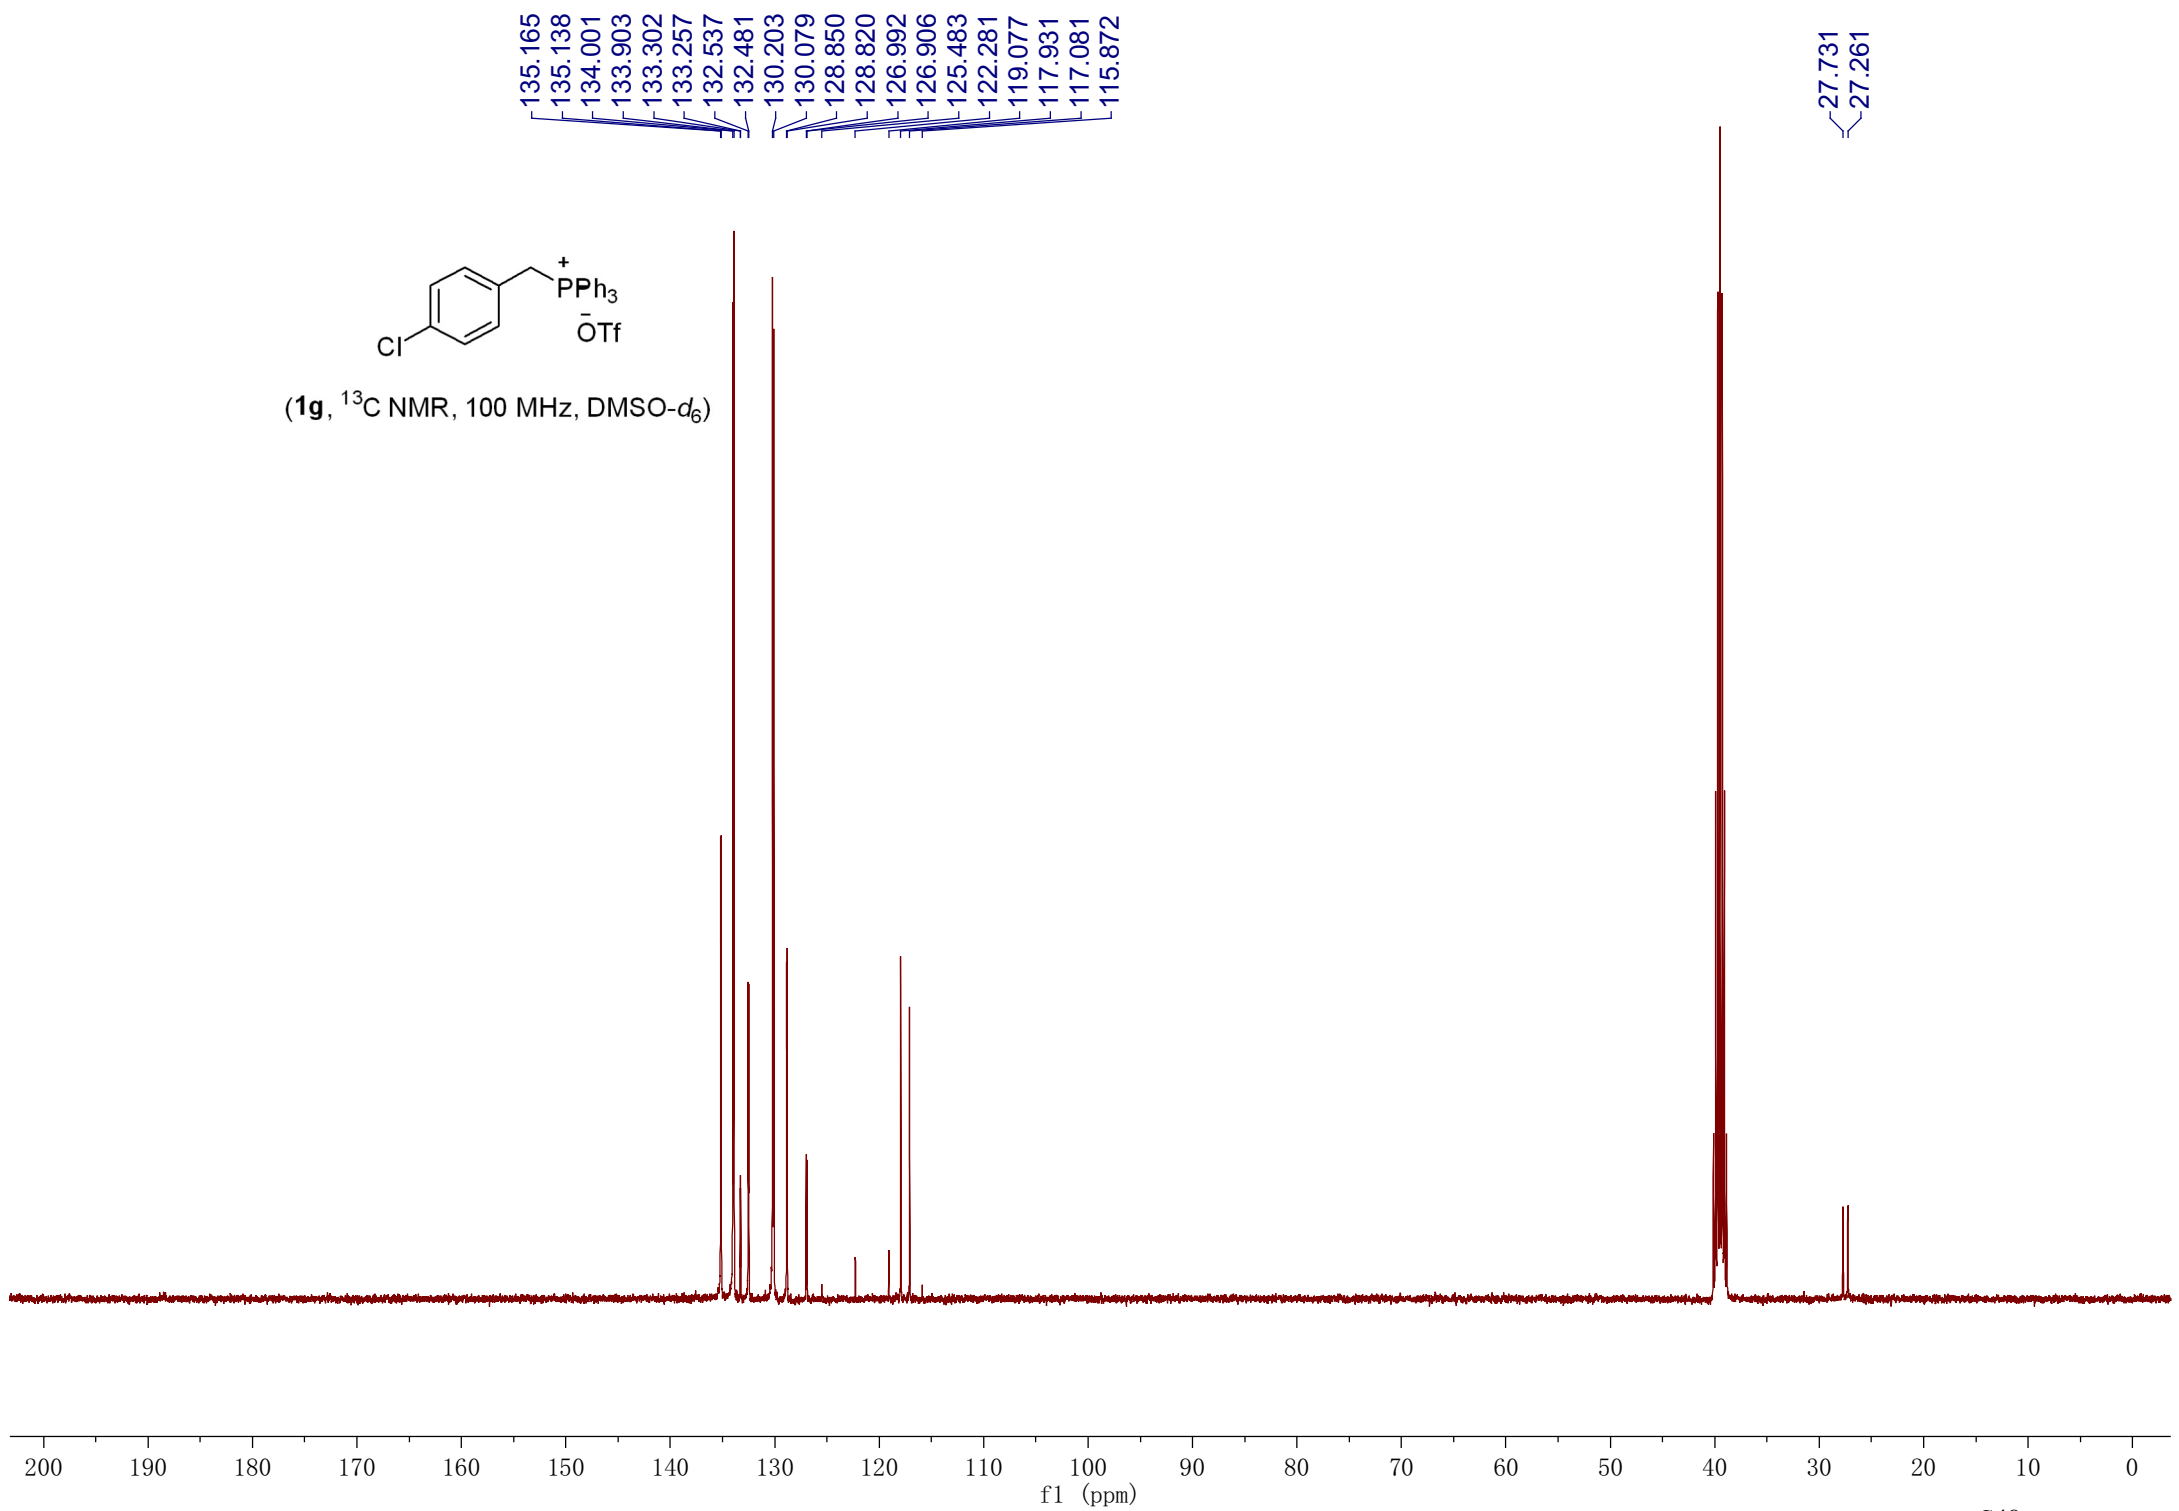



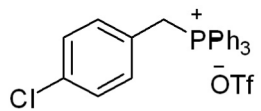

(1g,  $^{31}\text{P}$  NMR, 162 MHz, DMSO- $d_6$ )

—23.030

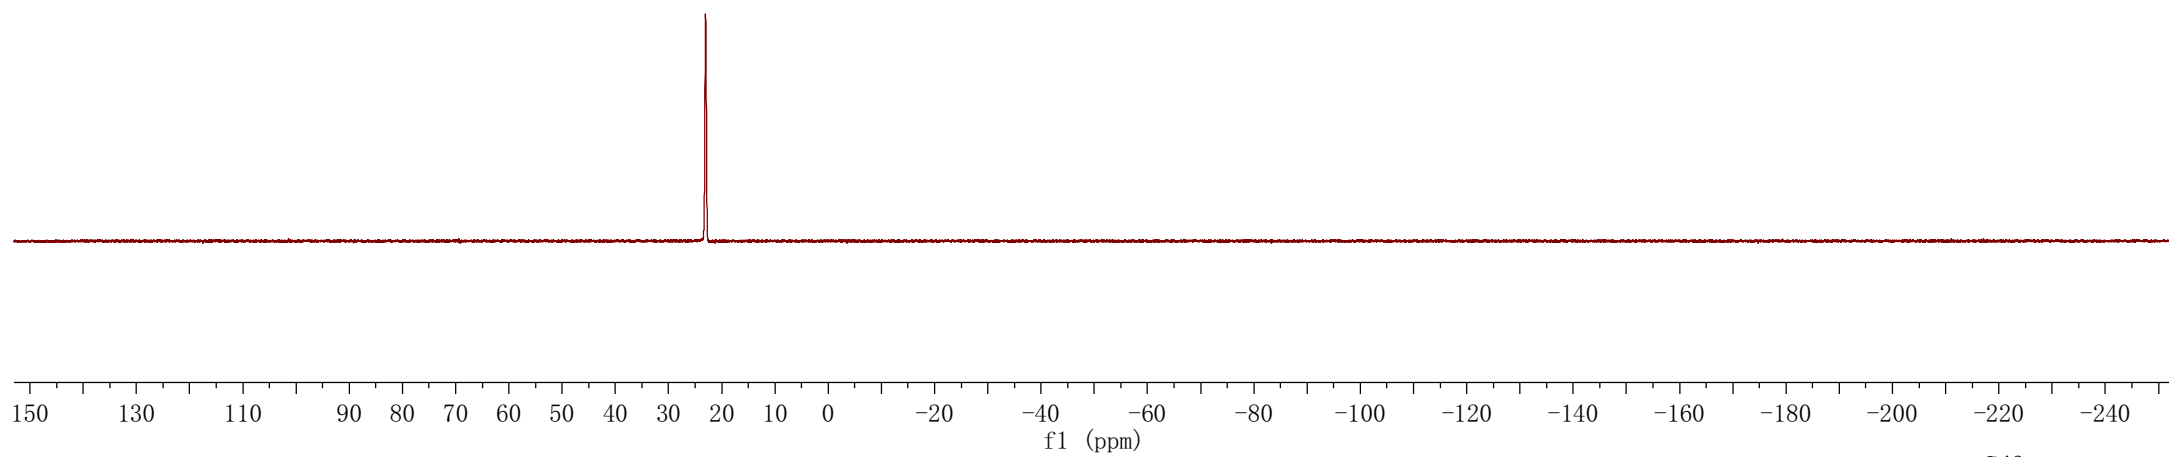

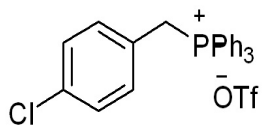

(1g,  $^{19}\text{F}$  NMR, 376 MHz,  $\text{DMSO-}d_6$ )

-77.689

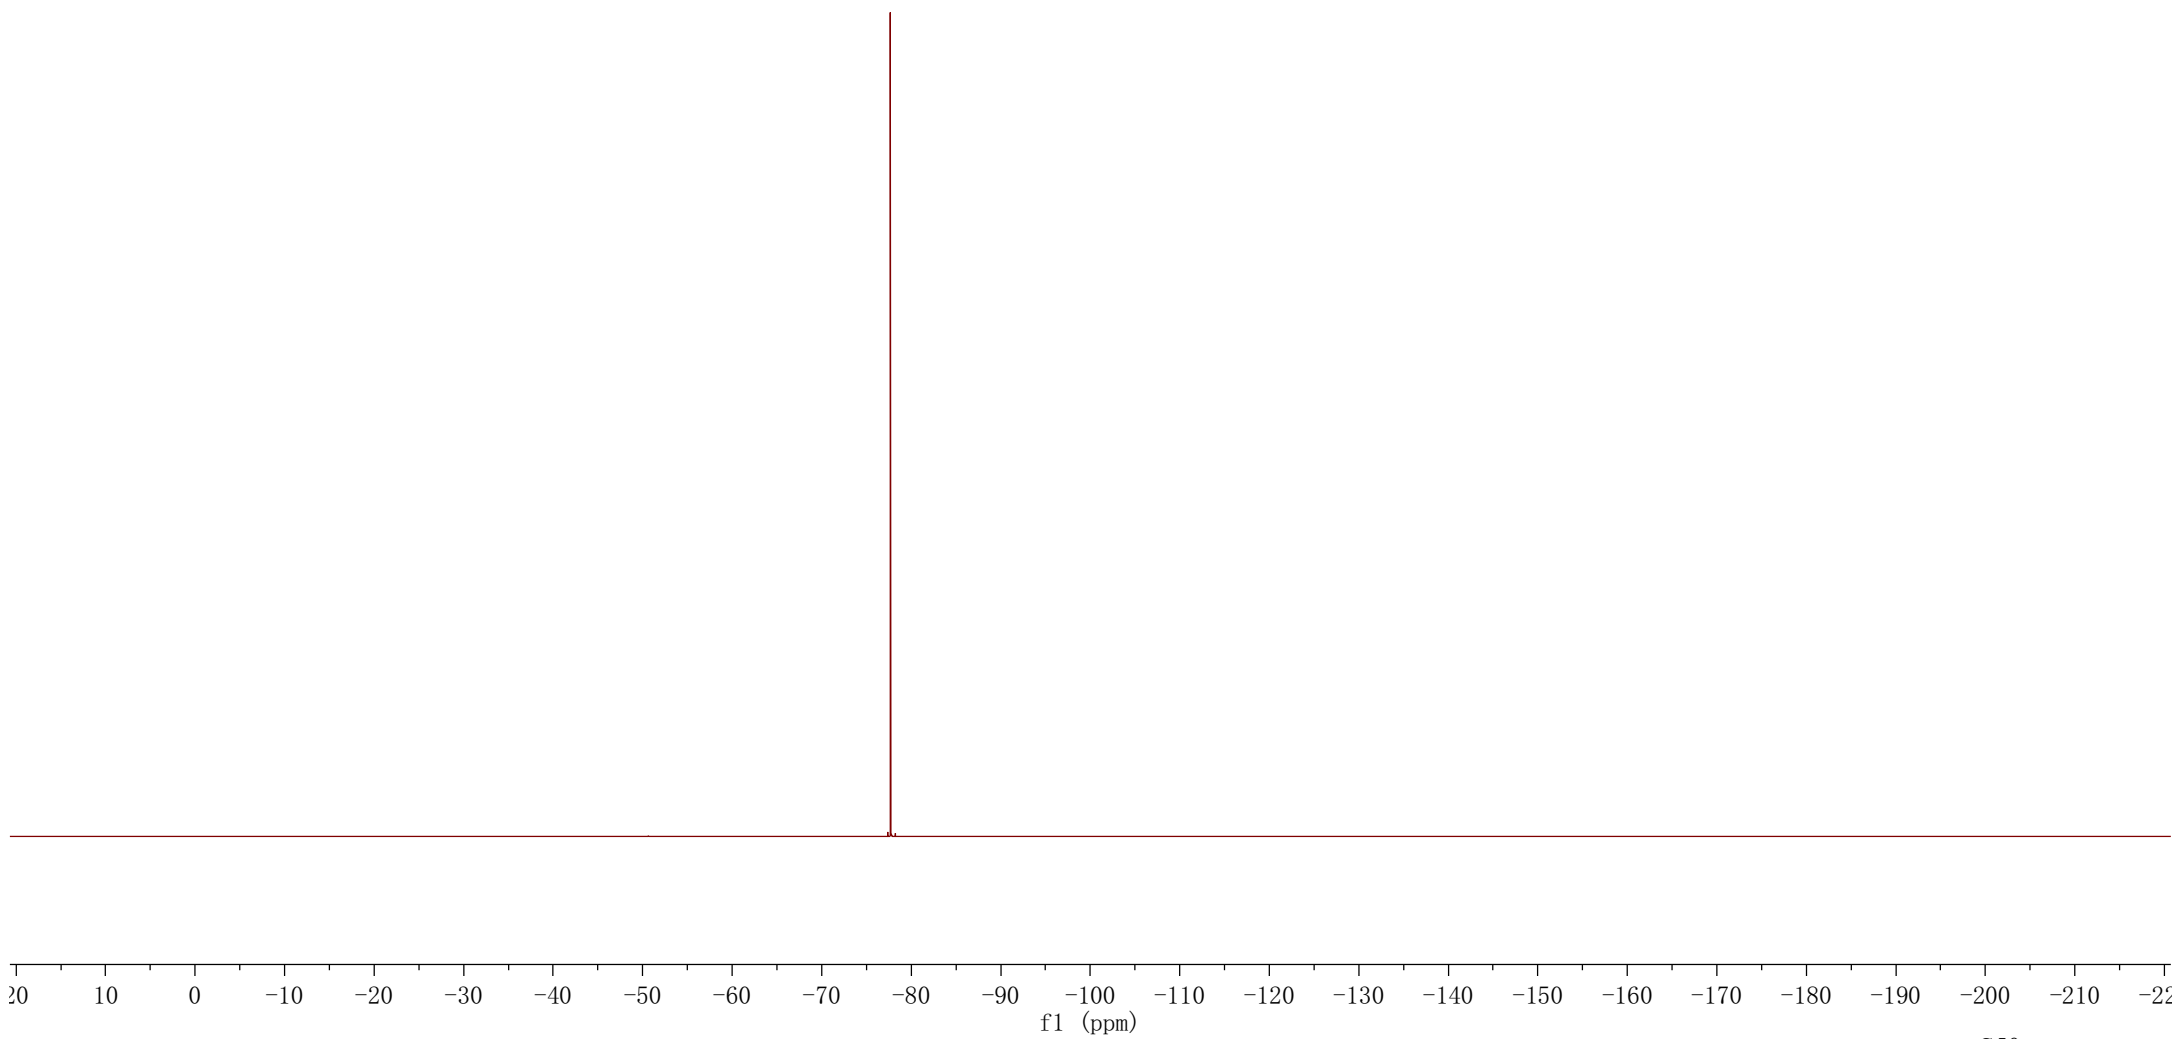

7.916  
7.902  
7.757  
7.707  
7.678  
7.661  
7.471  
7.455  
6.916  
6.900

5.187  
5.147

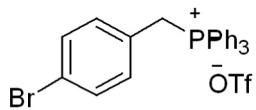

(1h, <sup>1</sup>H NMR, 400 MHz, DMSO-d<sub>6</sub>)

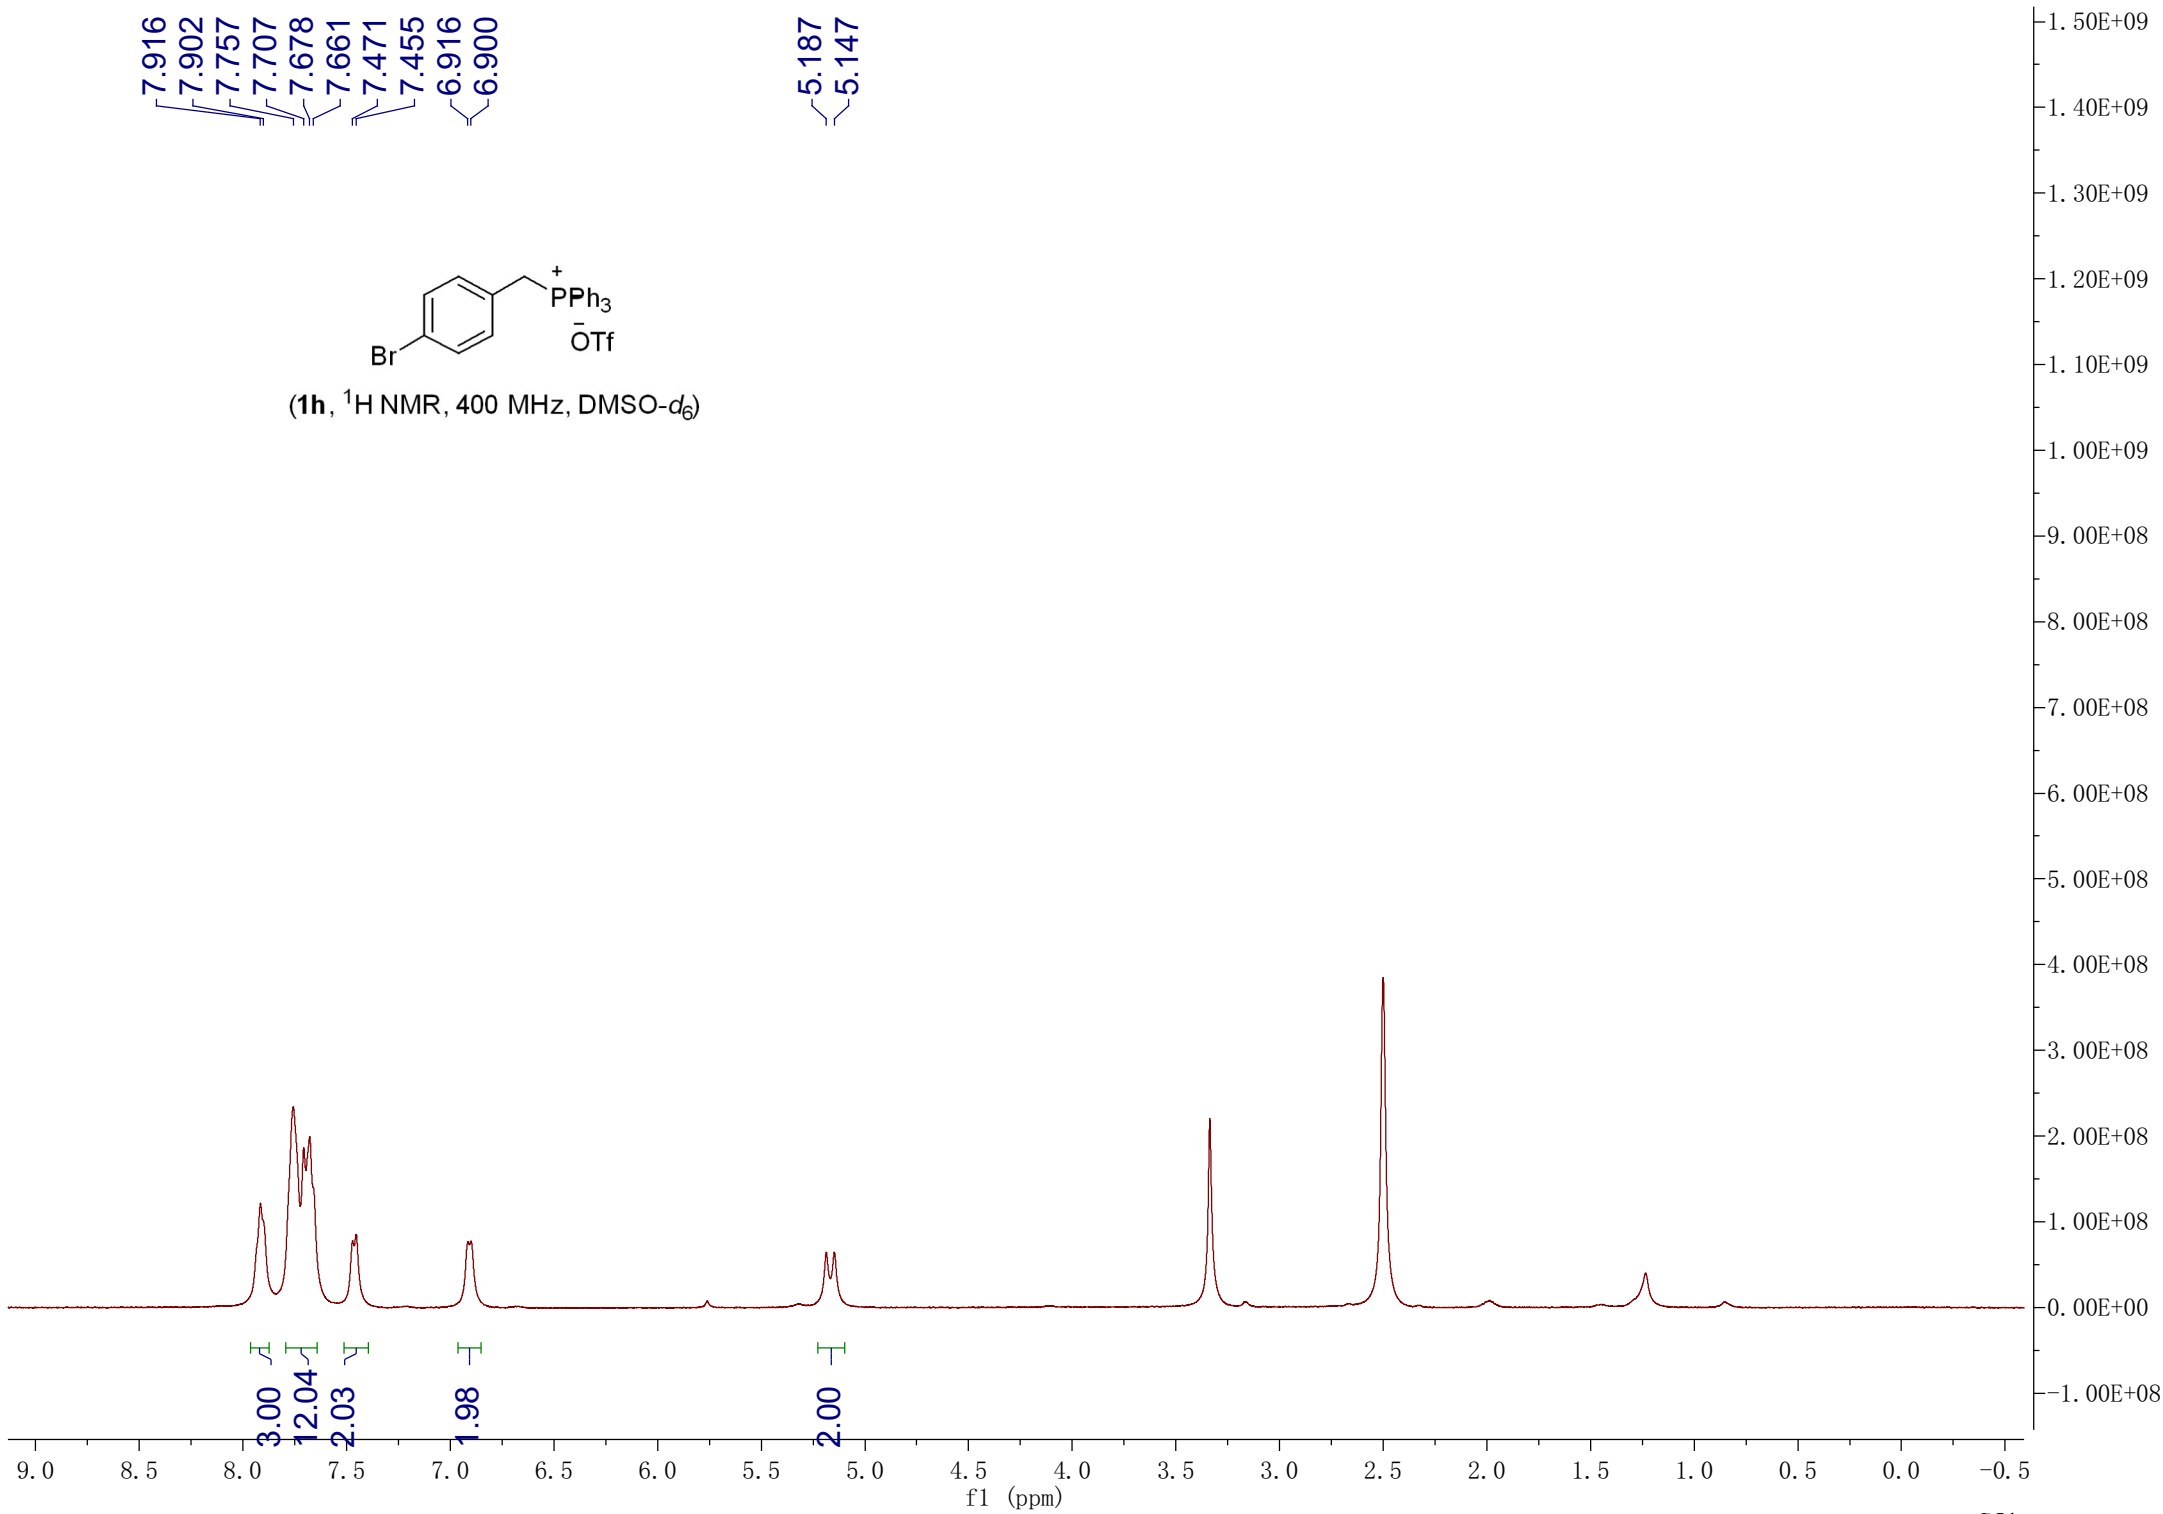

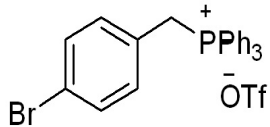

(1h, <sup>13</sup>C NMR, 100 MHz, DMSO-d<sub>6</sub>)

135.164  
135.137  
134.063  
133.966  
132.894  
132.840  
131.735  
131.706  
130.204  
130.081  
127.527  
127.441  
121.844  
121.797  
117.988  
117.138

27.760  
27.294

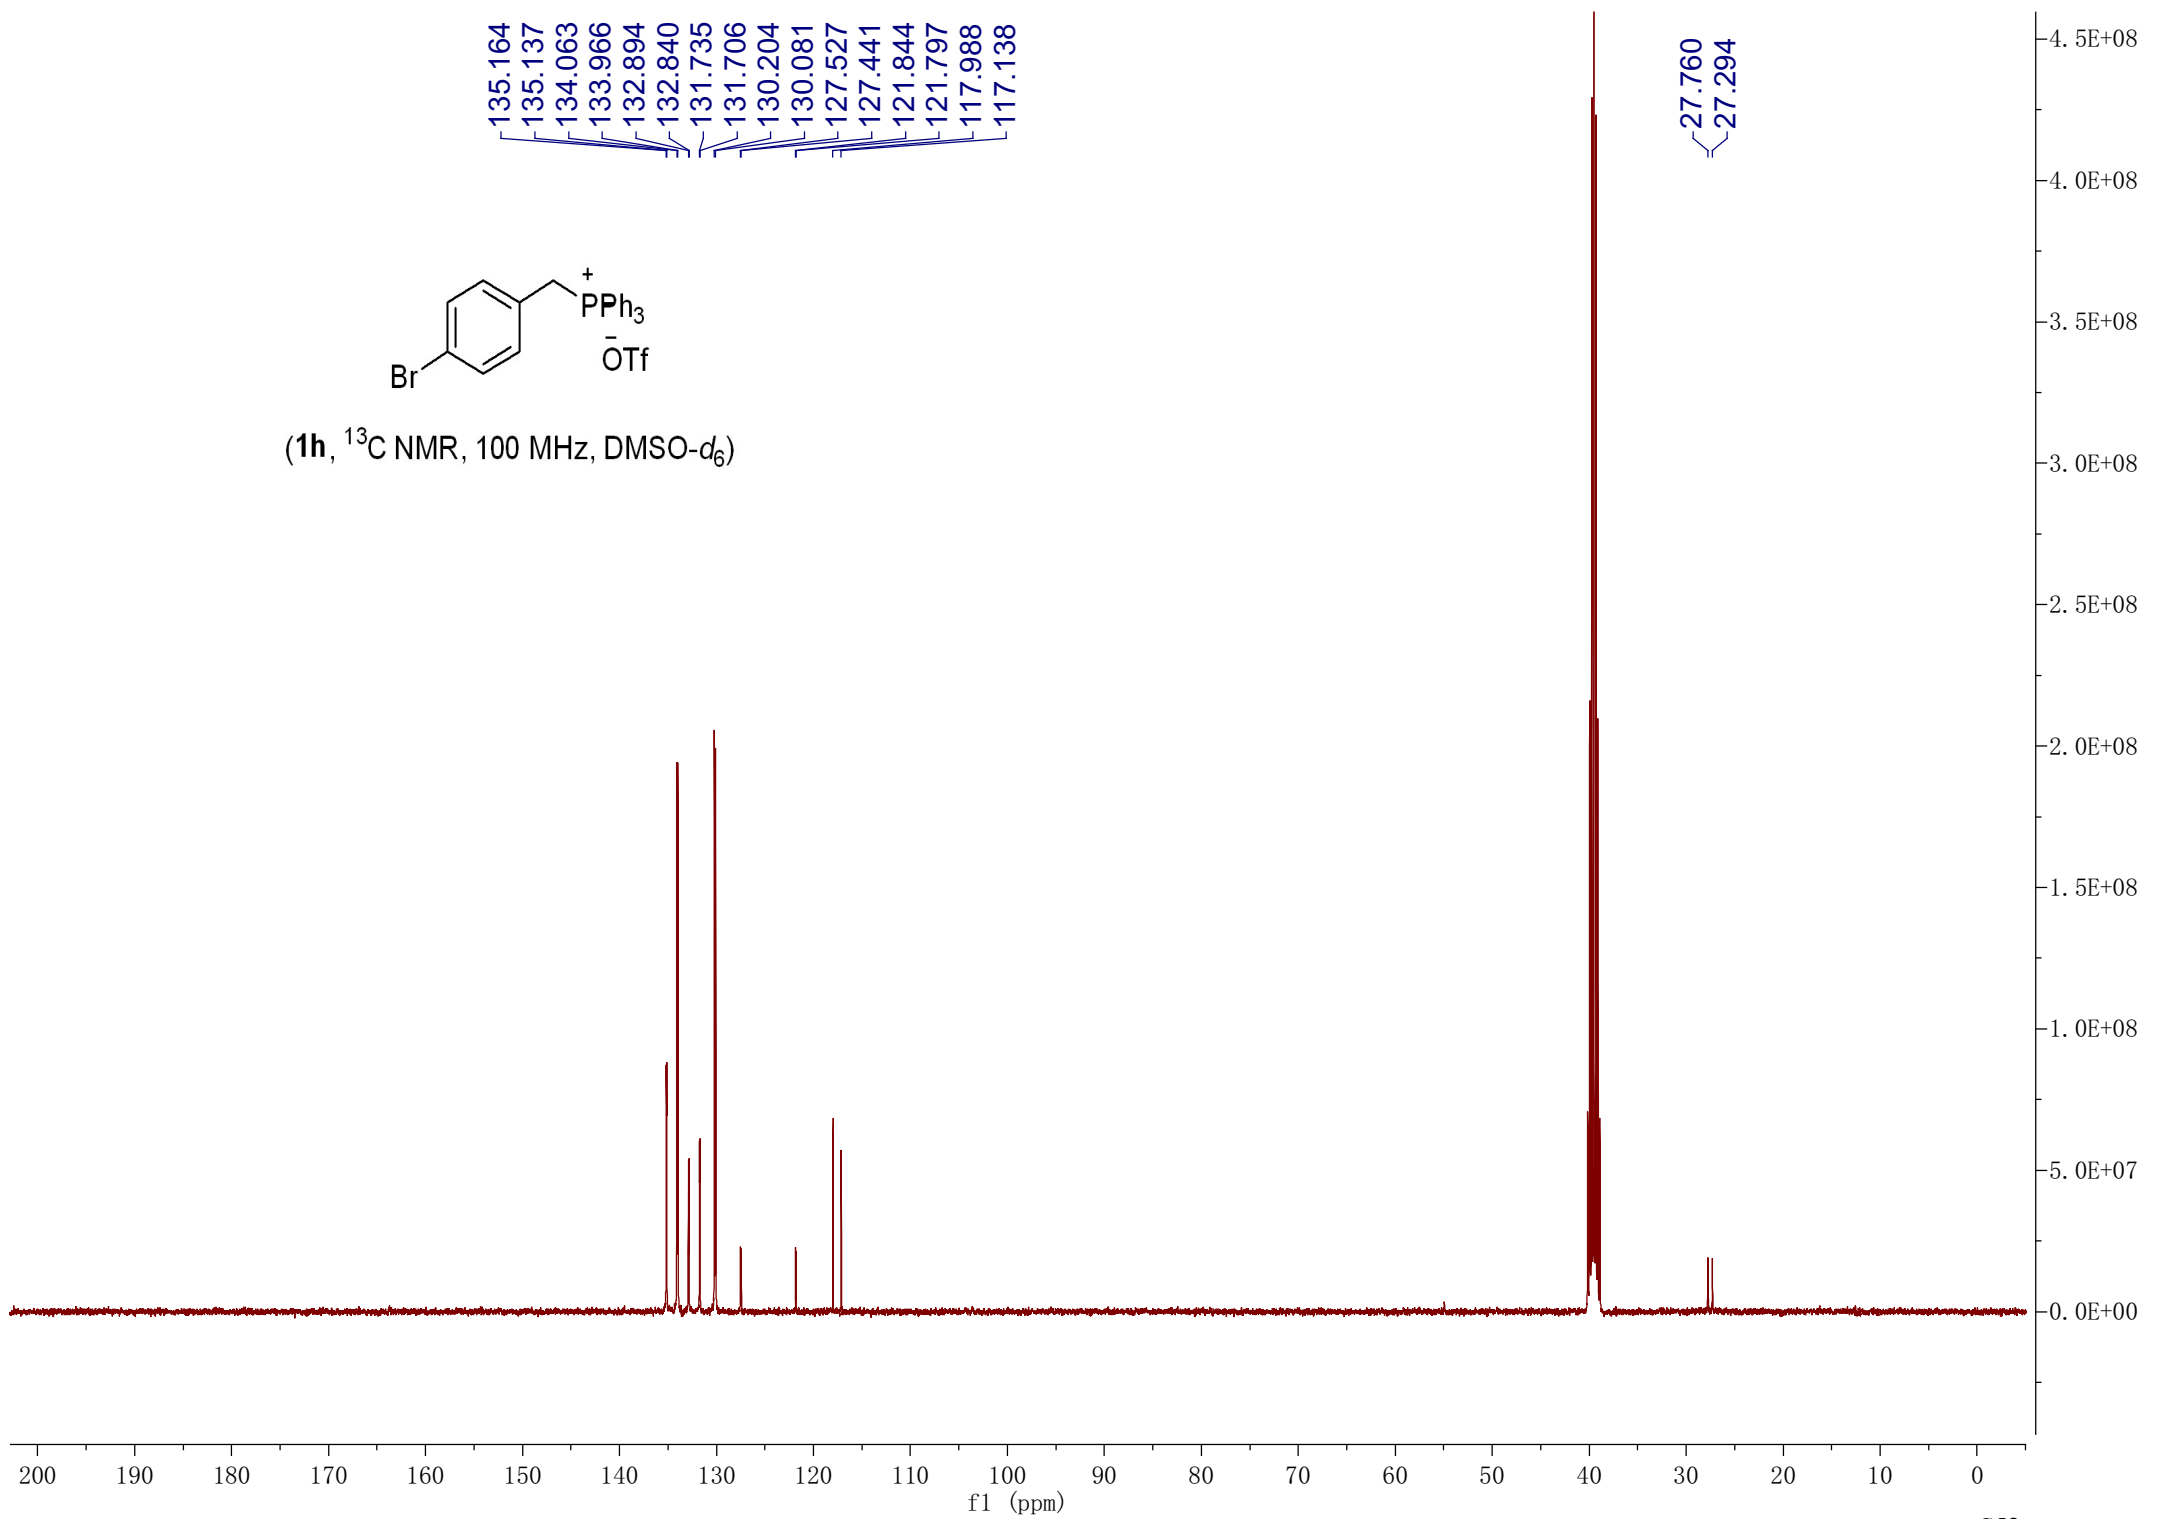

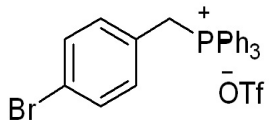

(1h,  $^{31}\text{P}$  NMR, 162 MHz, DMSO- $d_6$ )

-22.880

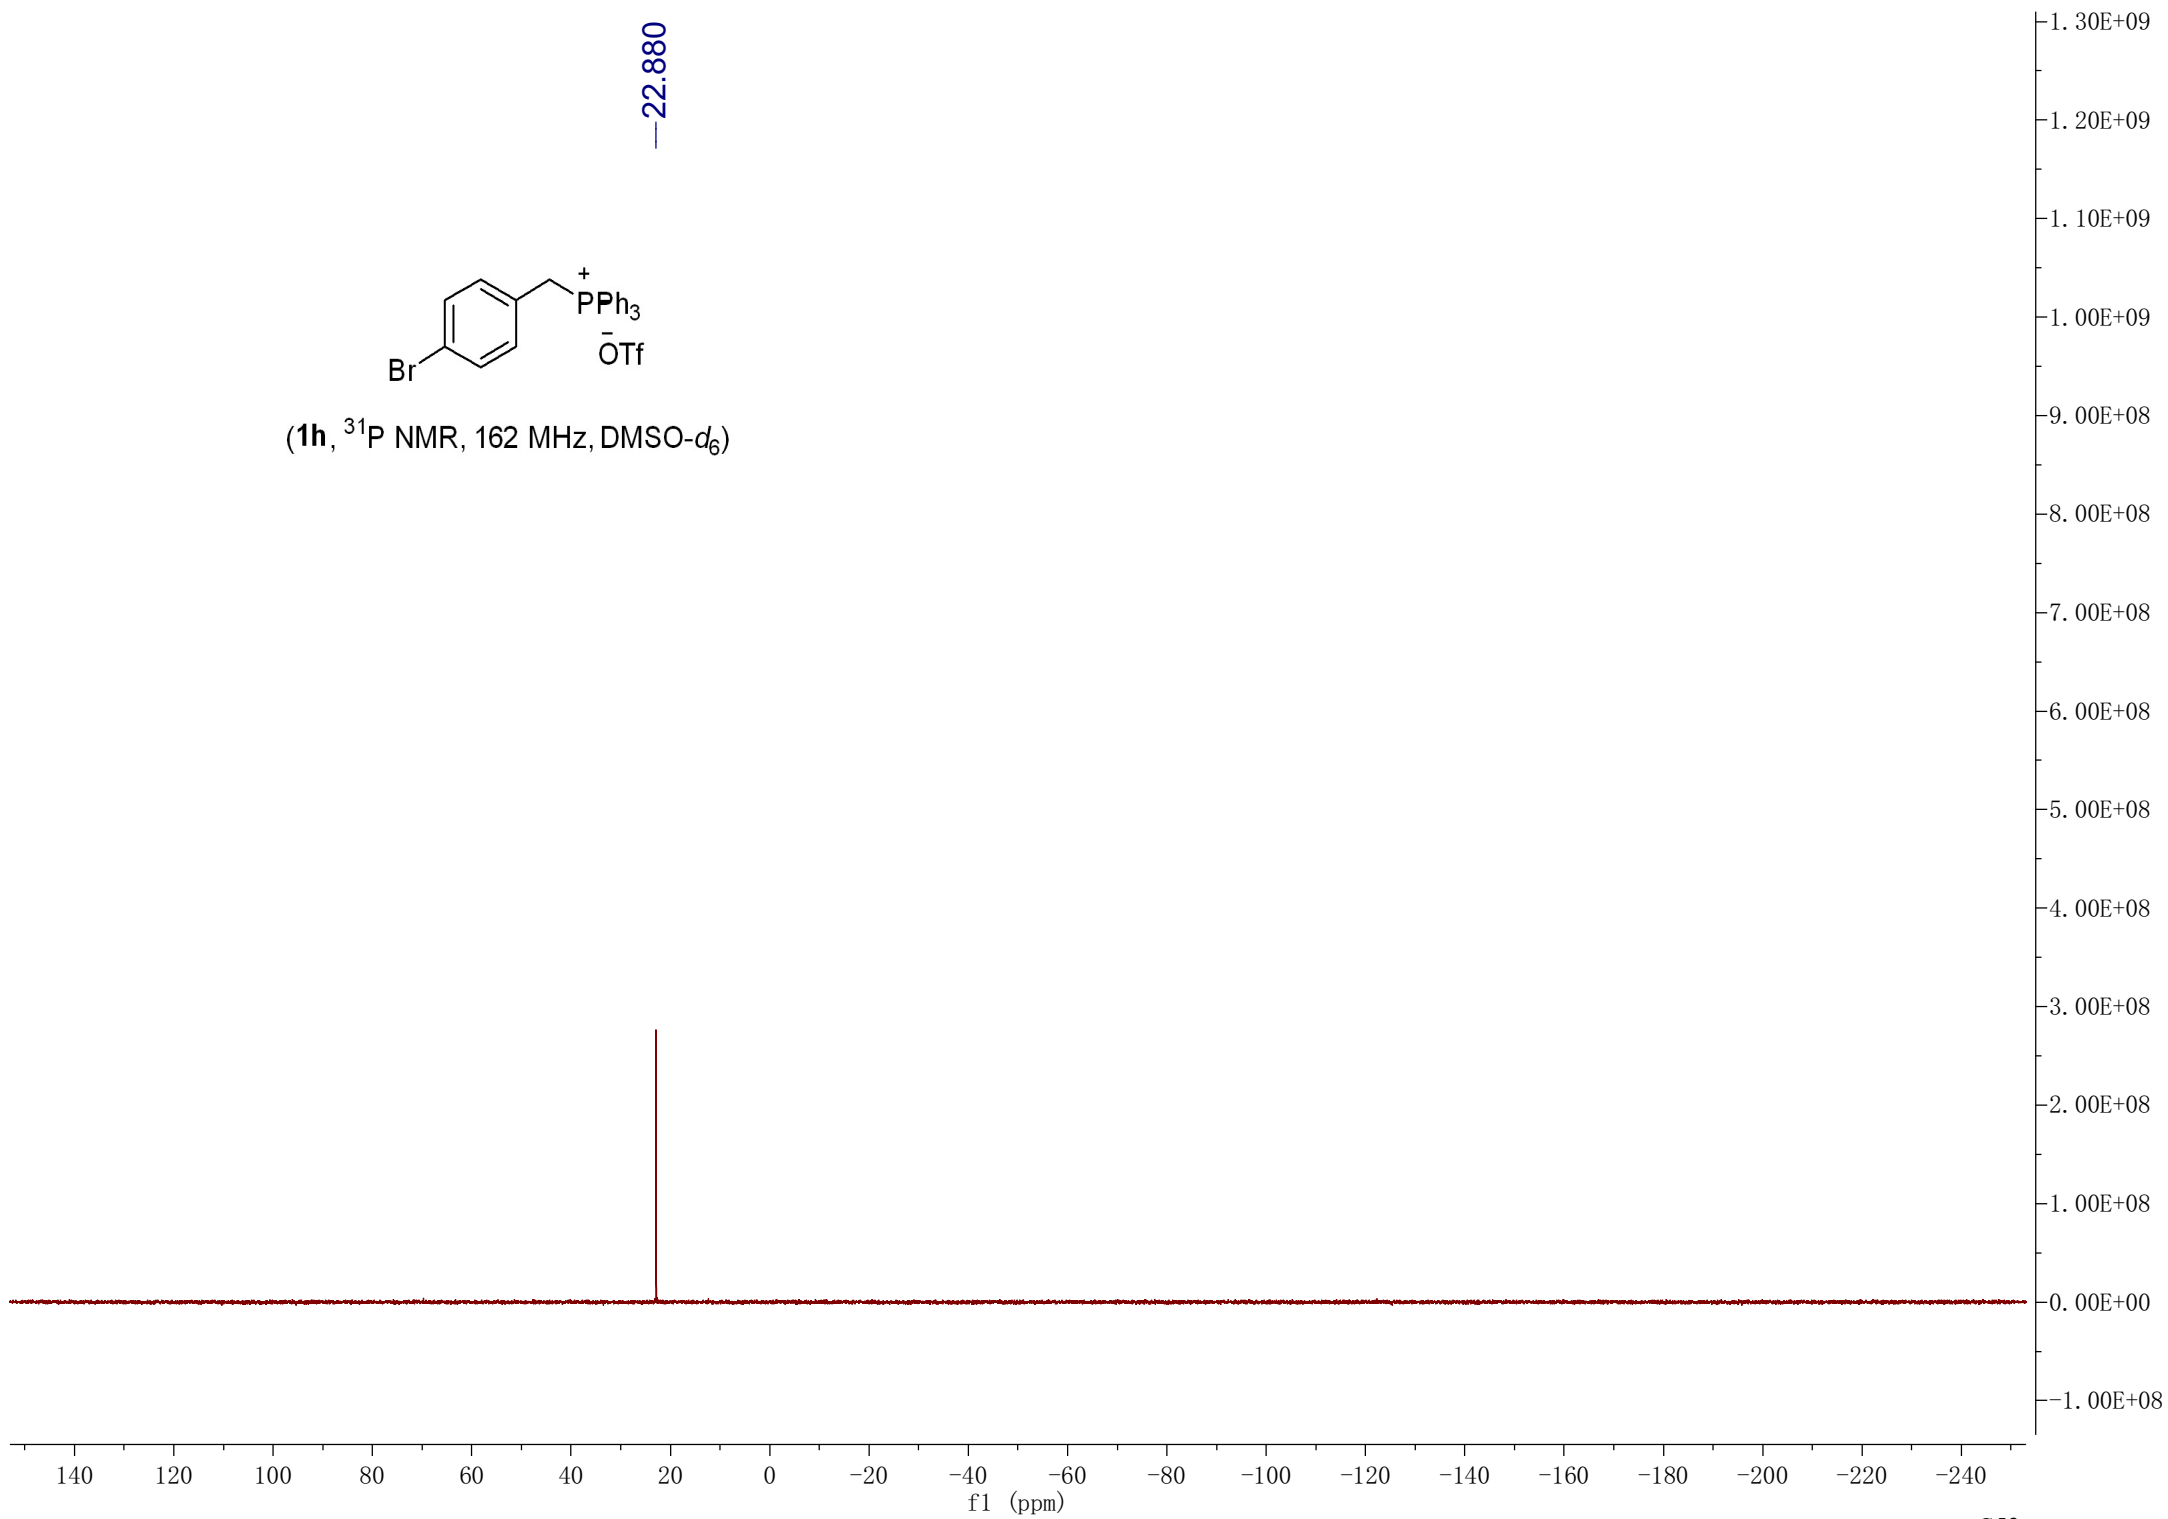

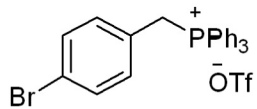

(1h,  $^{19}\text{F}$  NMR, 376 MHz,  $\text{DMSO-}d_6$ )

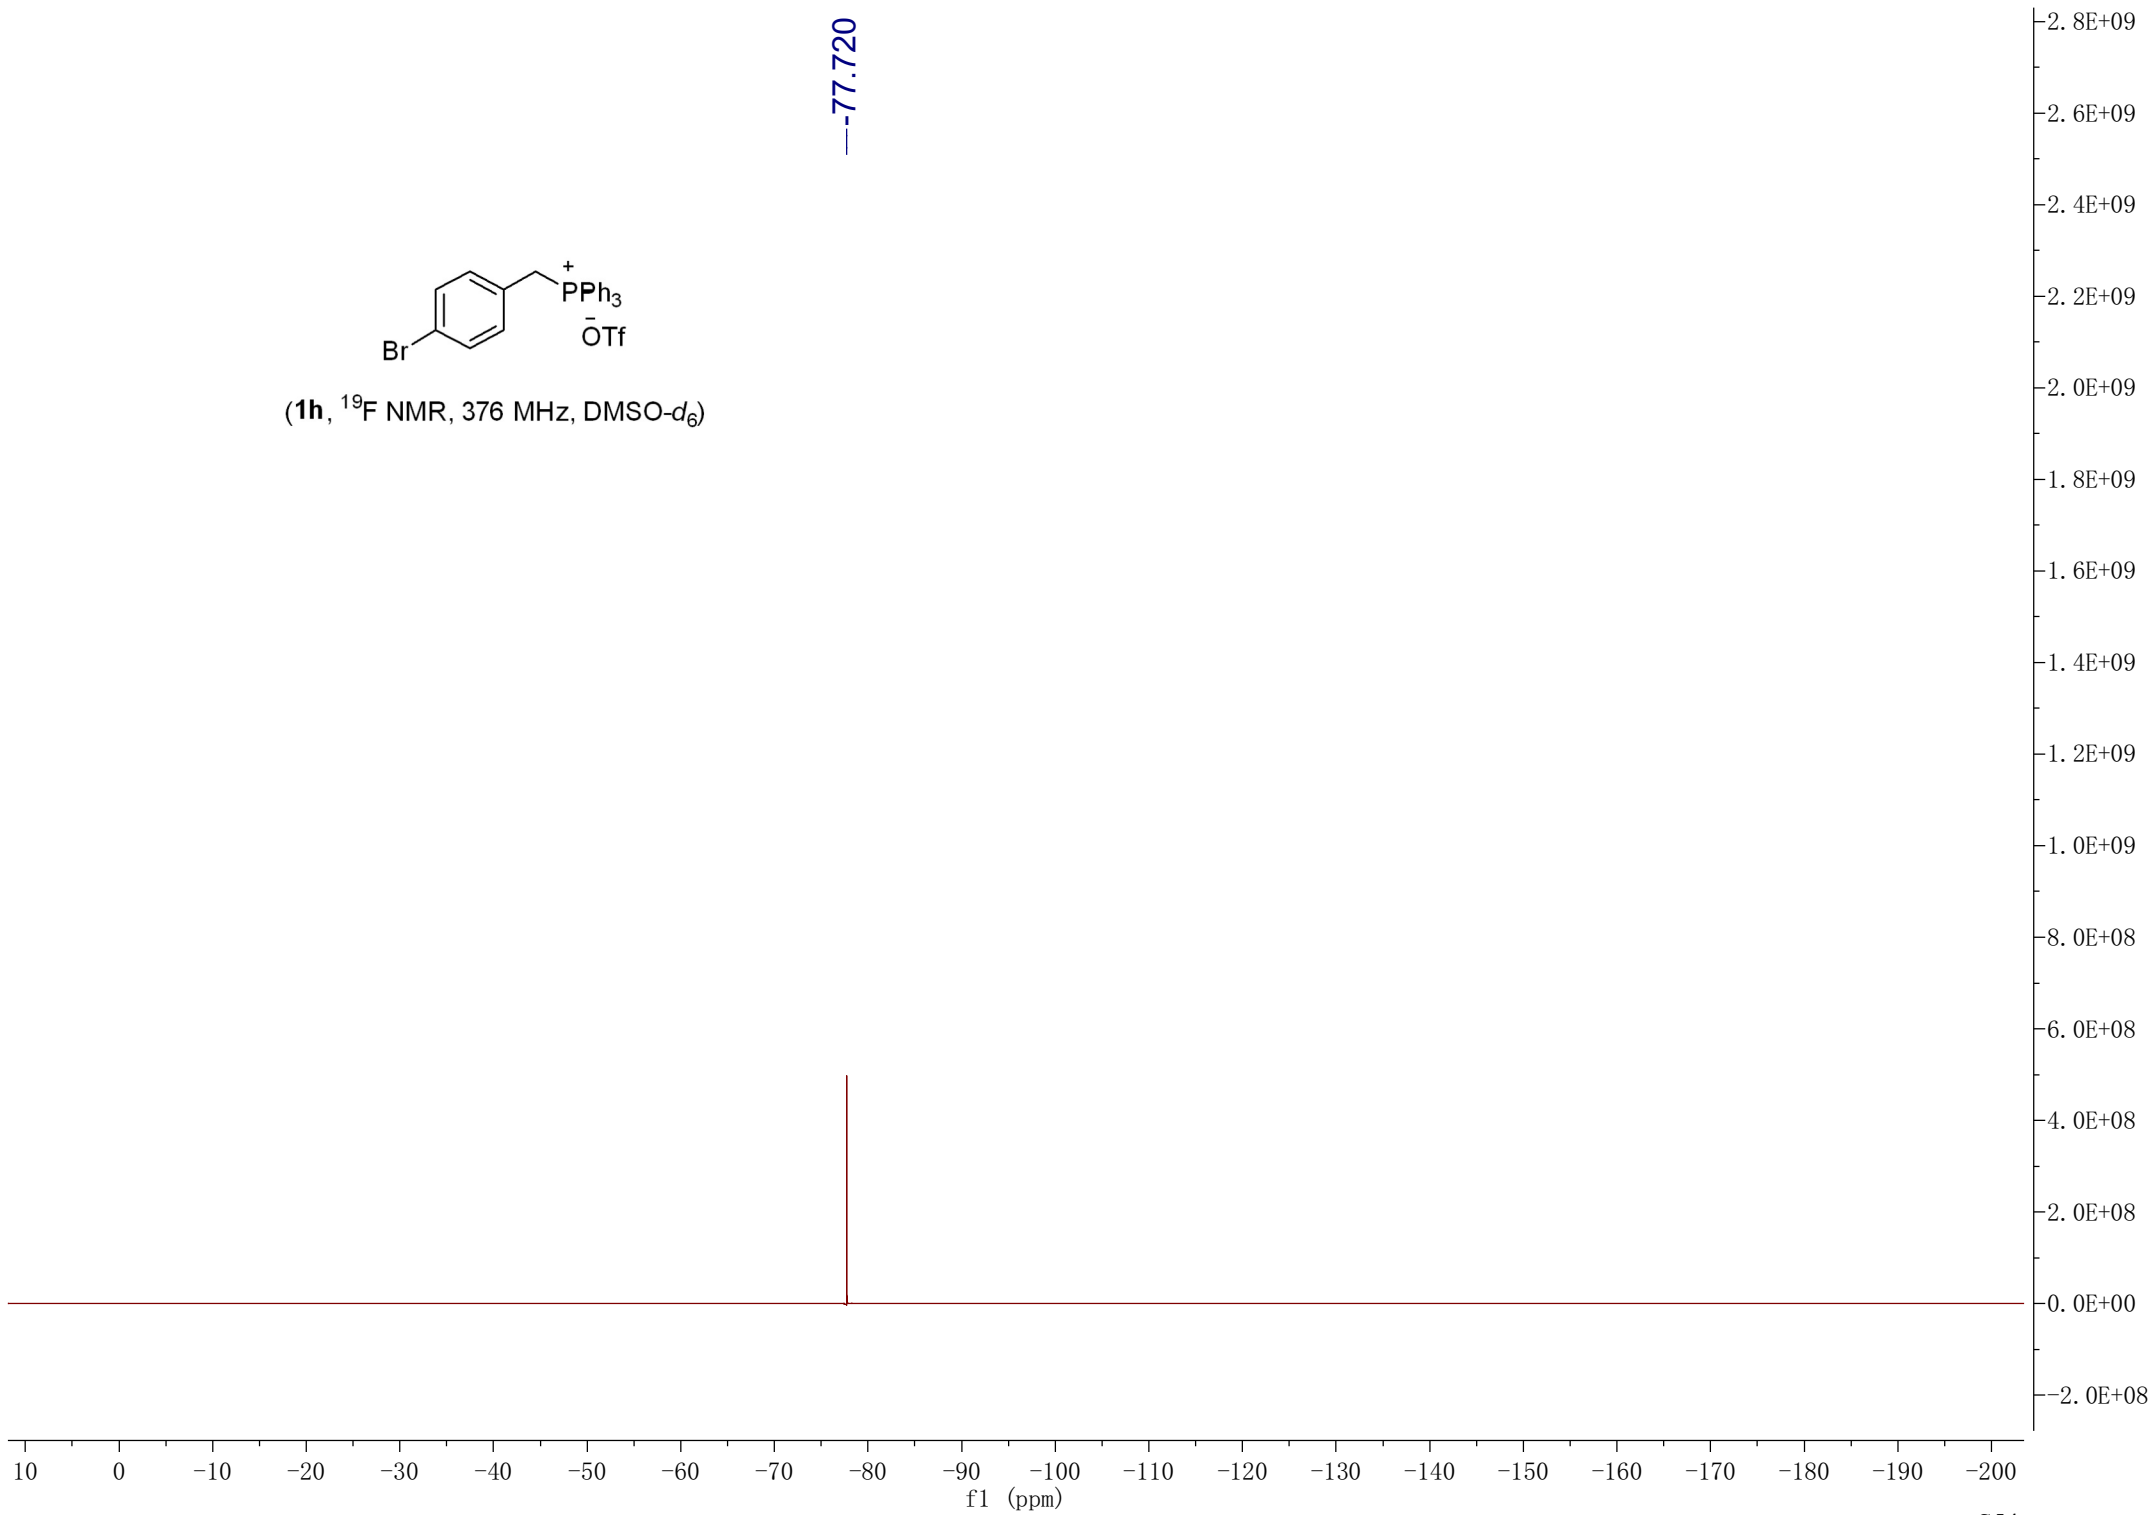

7.923  
7.908  
7.760  
7.723  
7.693  
7.674  
7.649  
7.630  
7.197  
7.181

5.312  
5.272

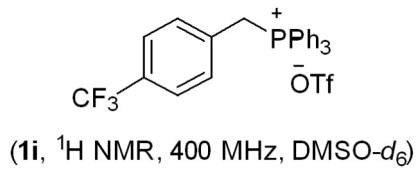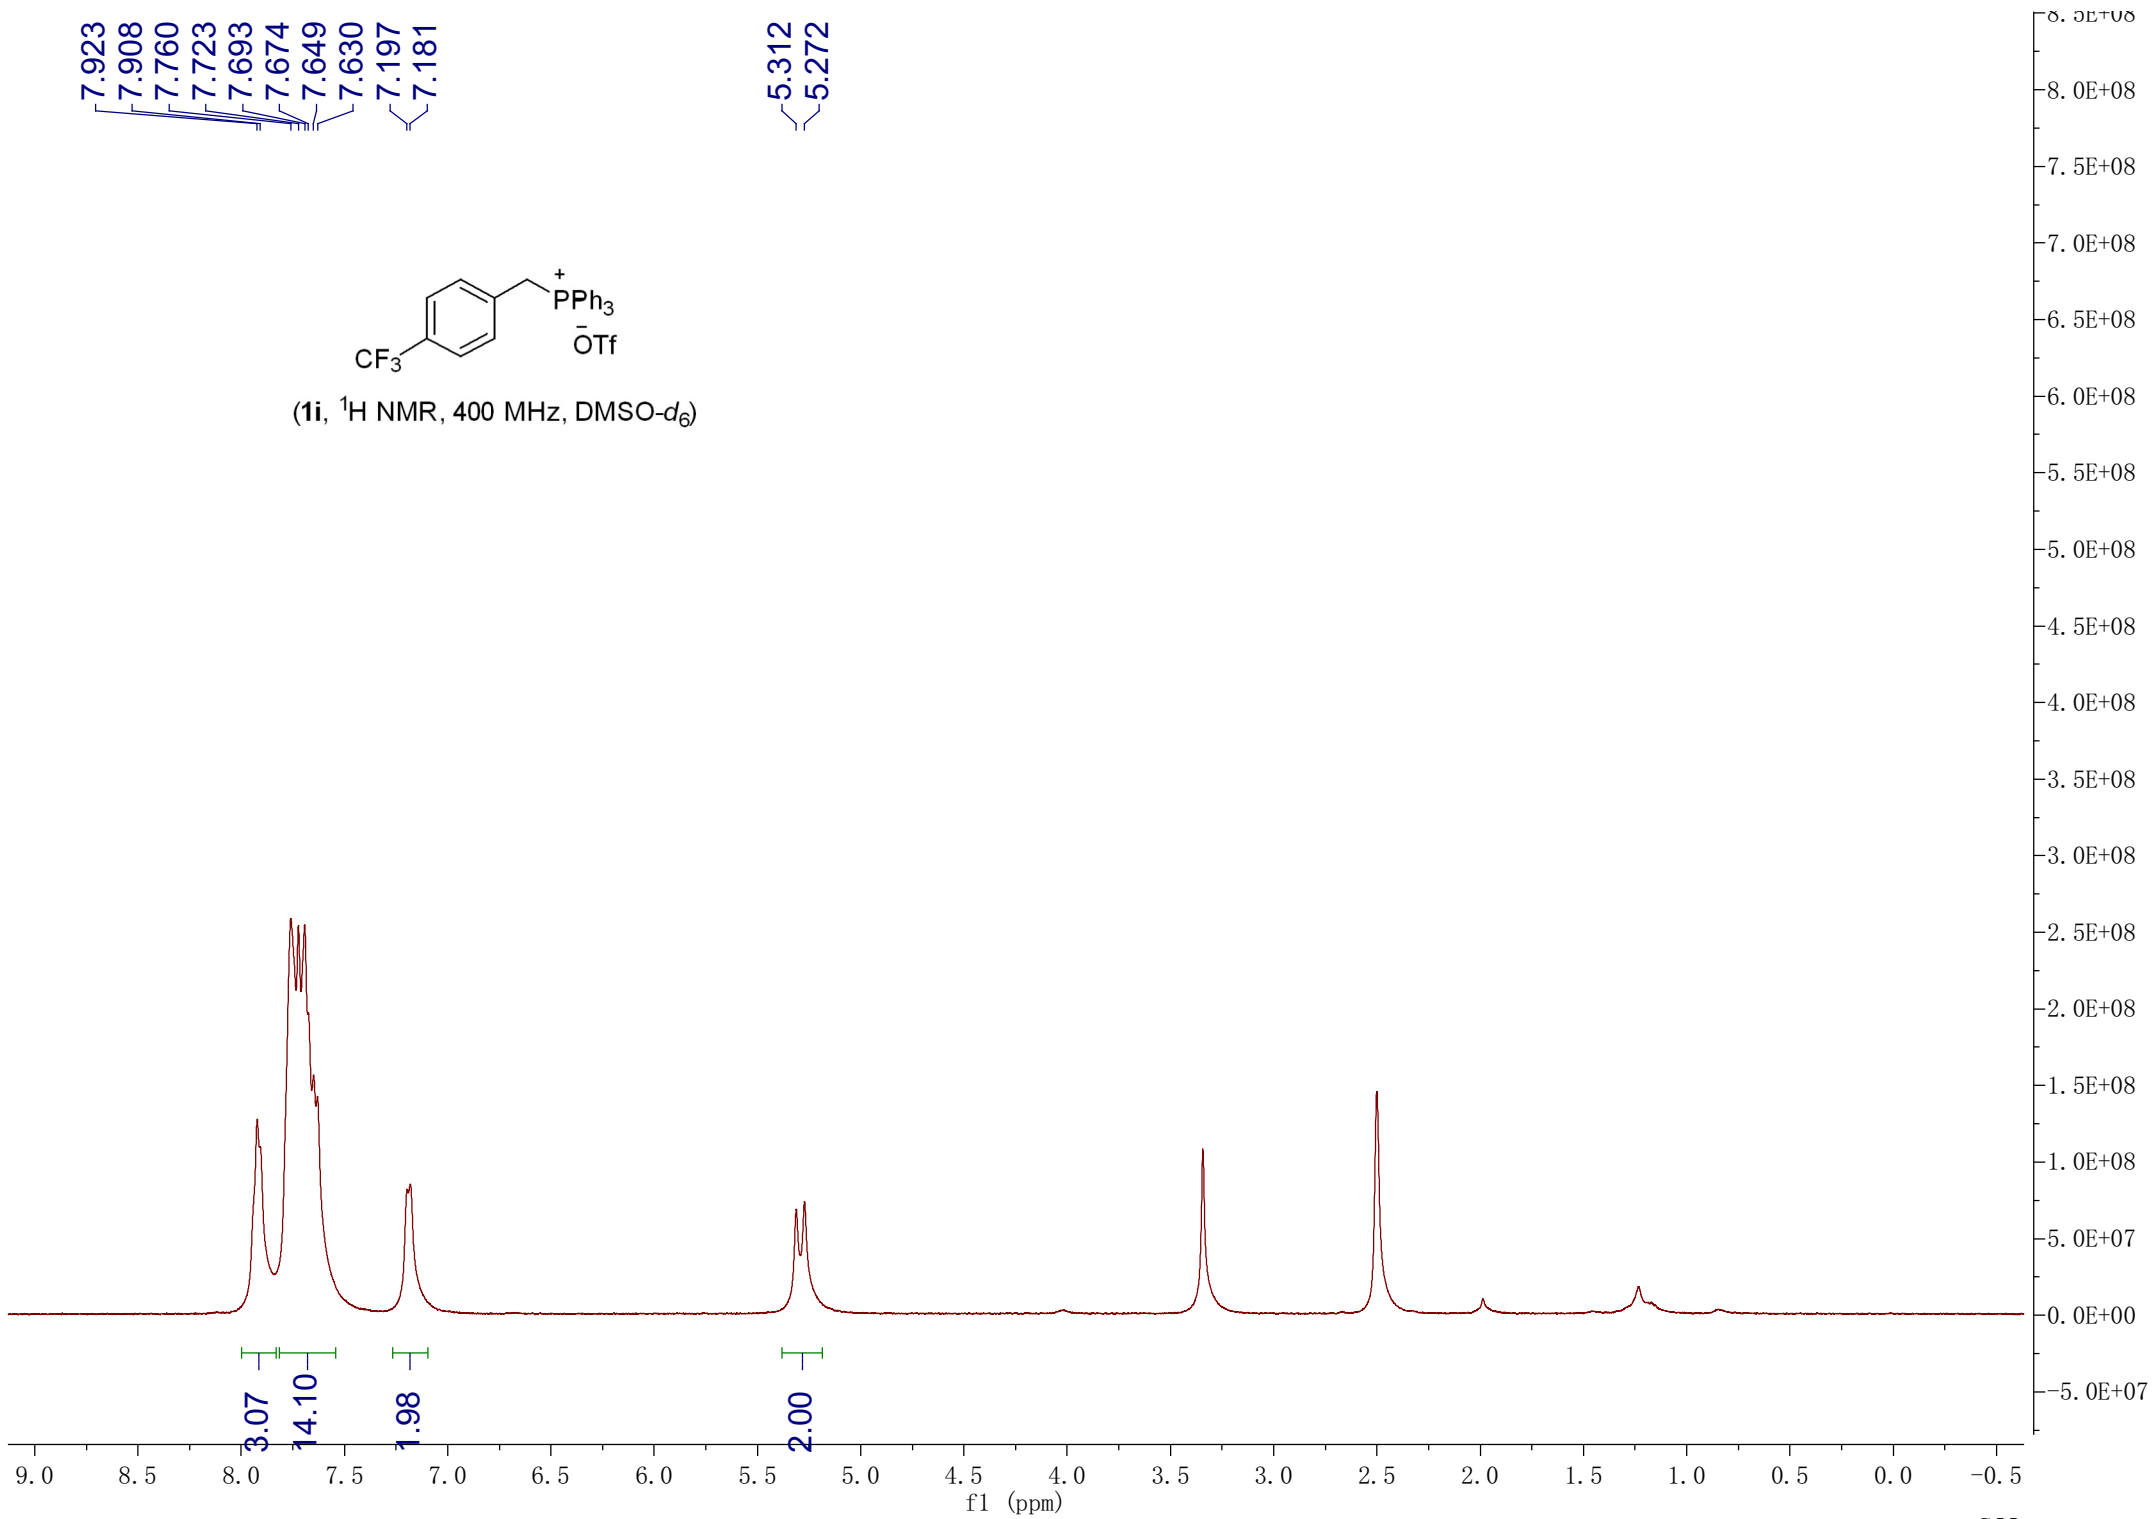

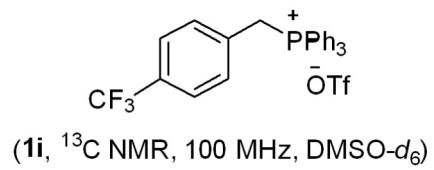

135.317  
135.287  
134.132  
134.036  
131.778  
131.725  
131.656  
131.577  
130.715  
130.677  
130.371  
130.246  
127.739  
125.622  
125.586  
125.552  
125.517  
125.033  
122.372  
122.331  
119.627  
119.185  
117.382  
116.524  
116.000

29.844  
29.363

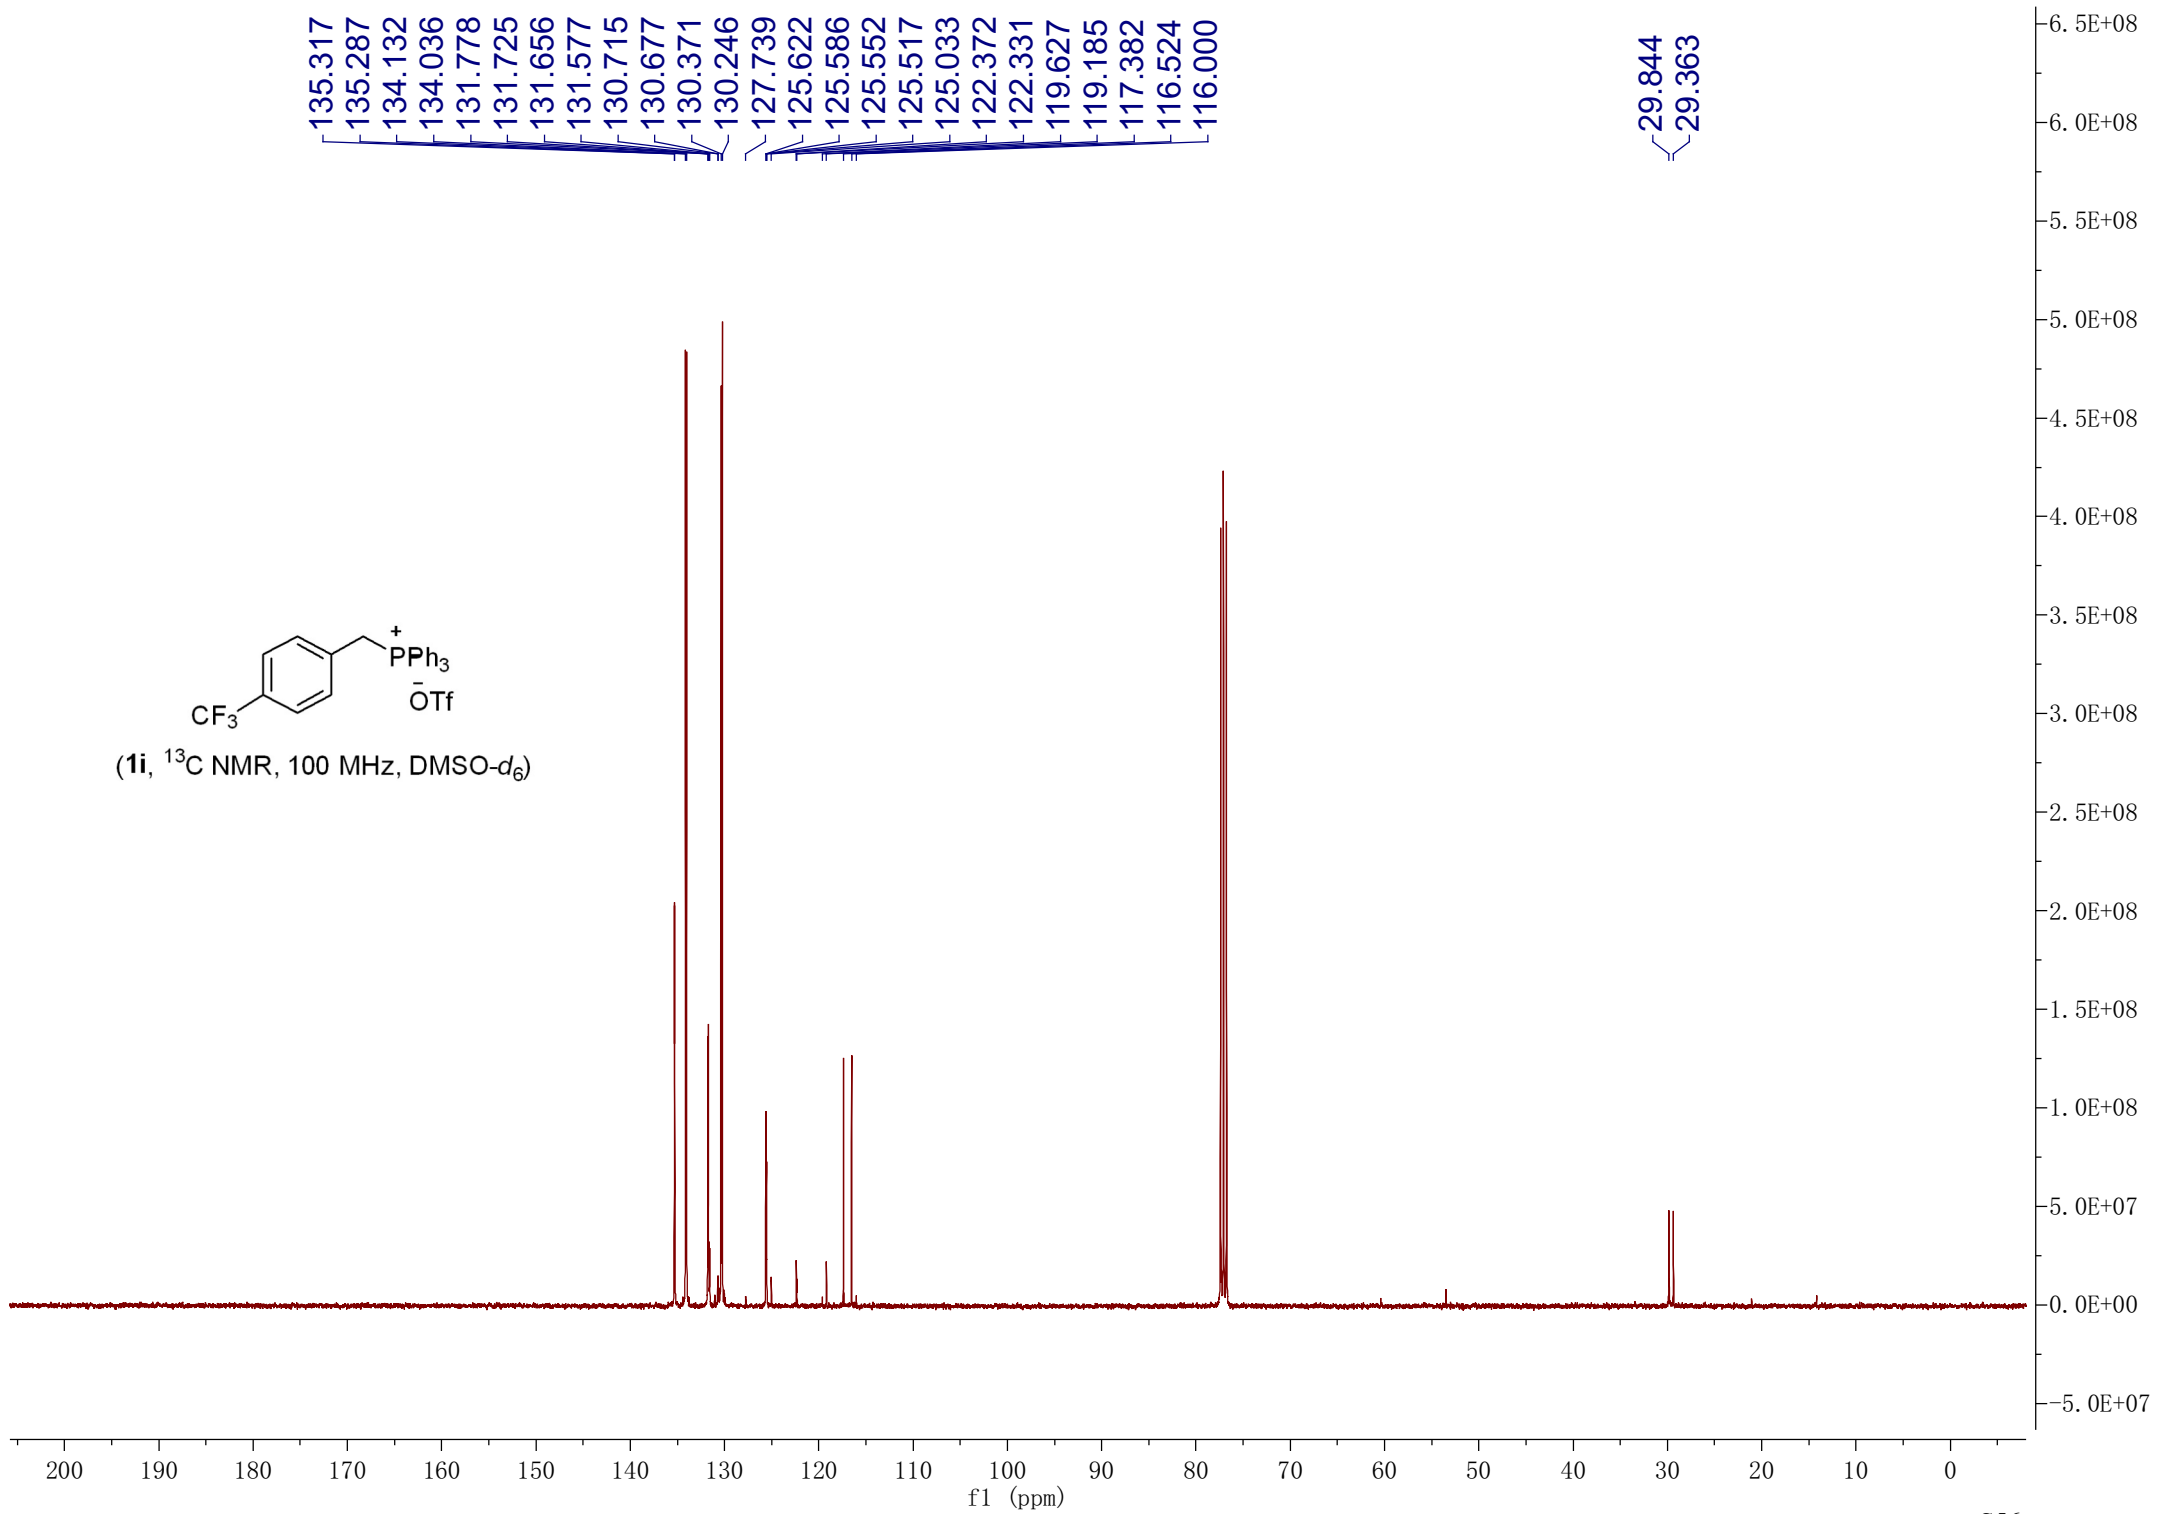



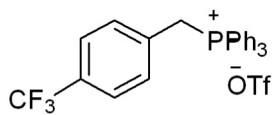

(**1i**,  $^{31}\text{P}$  NMR, 162 MHz,  $\text{DMSO-}d_6$ )

—23.479

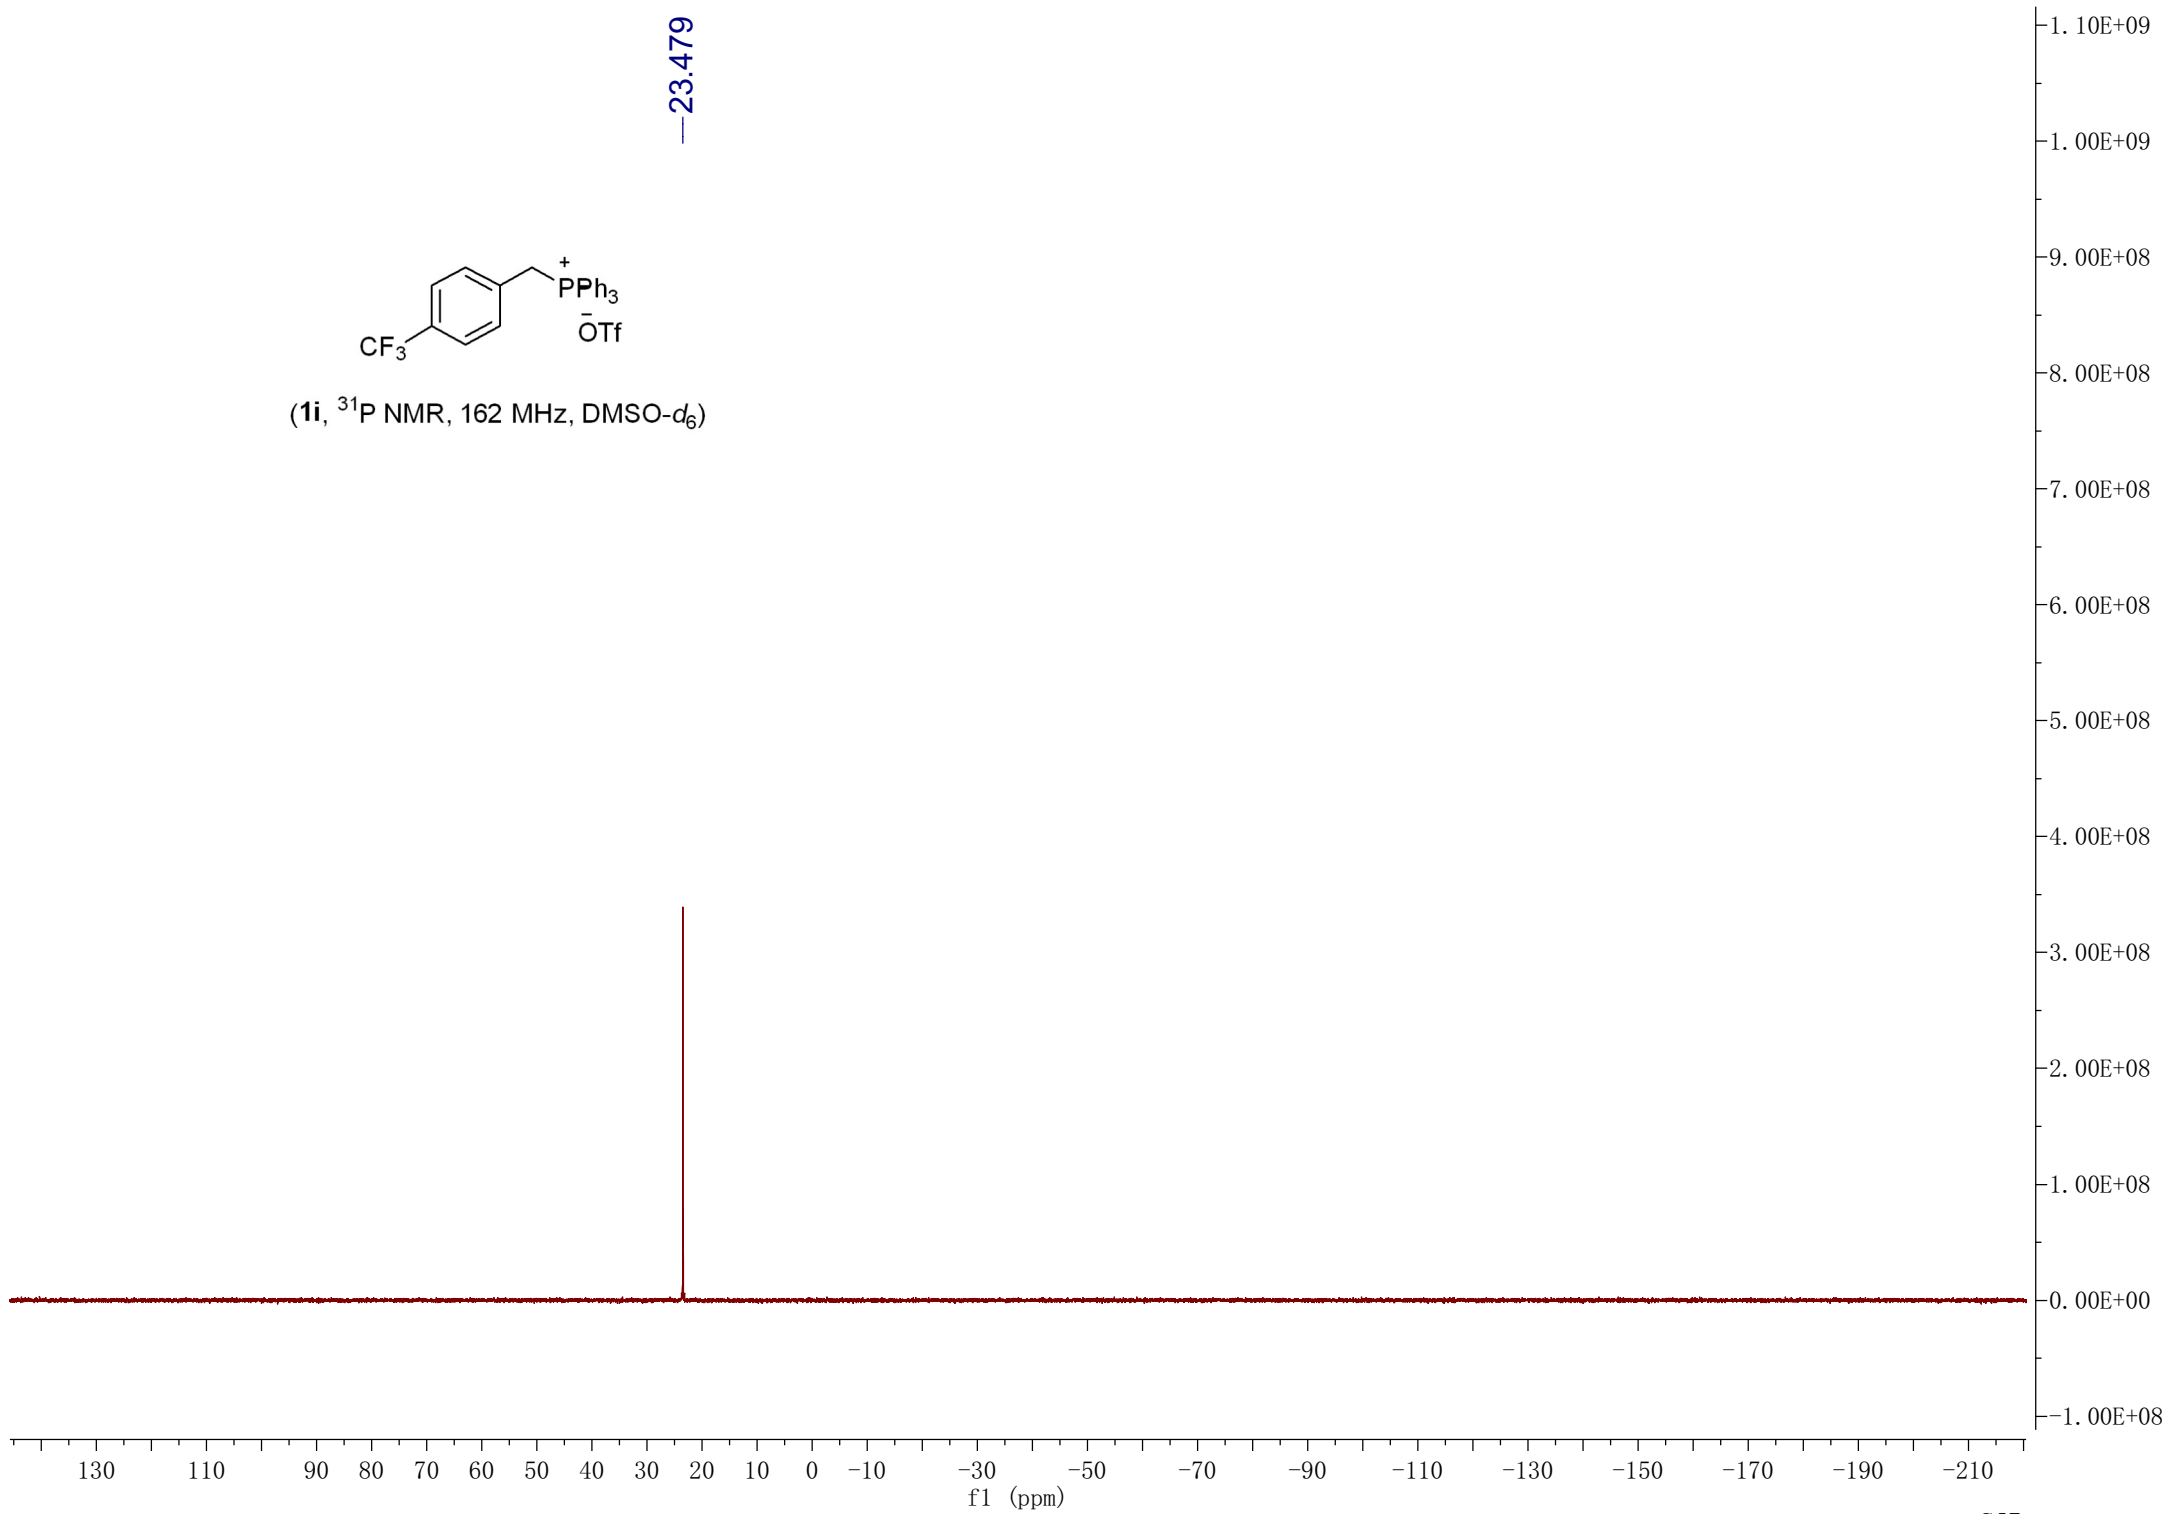

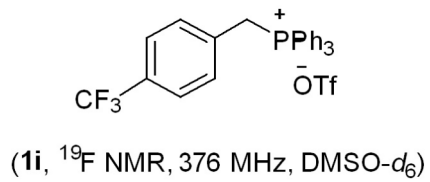

-61.131

-77.773

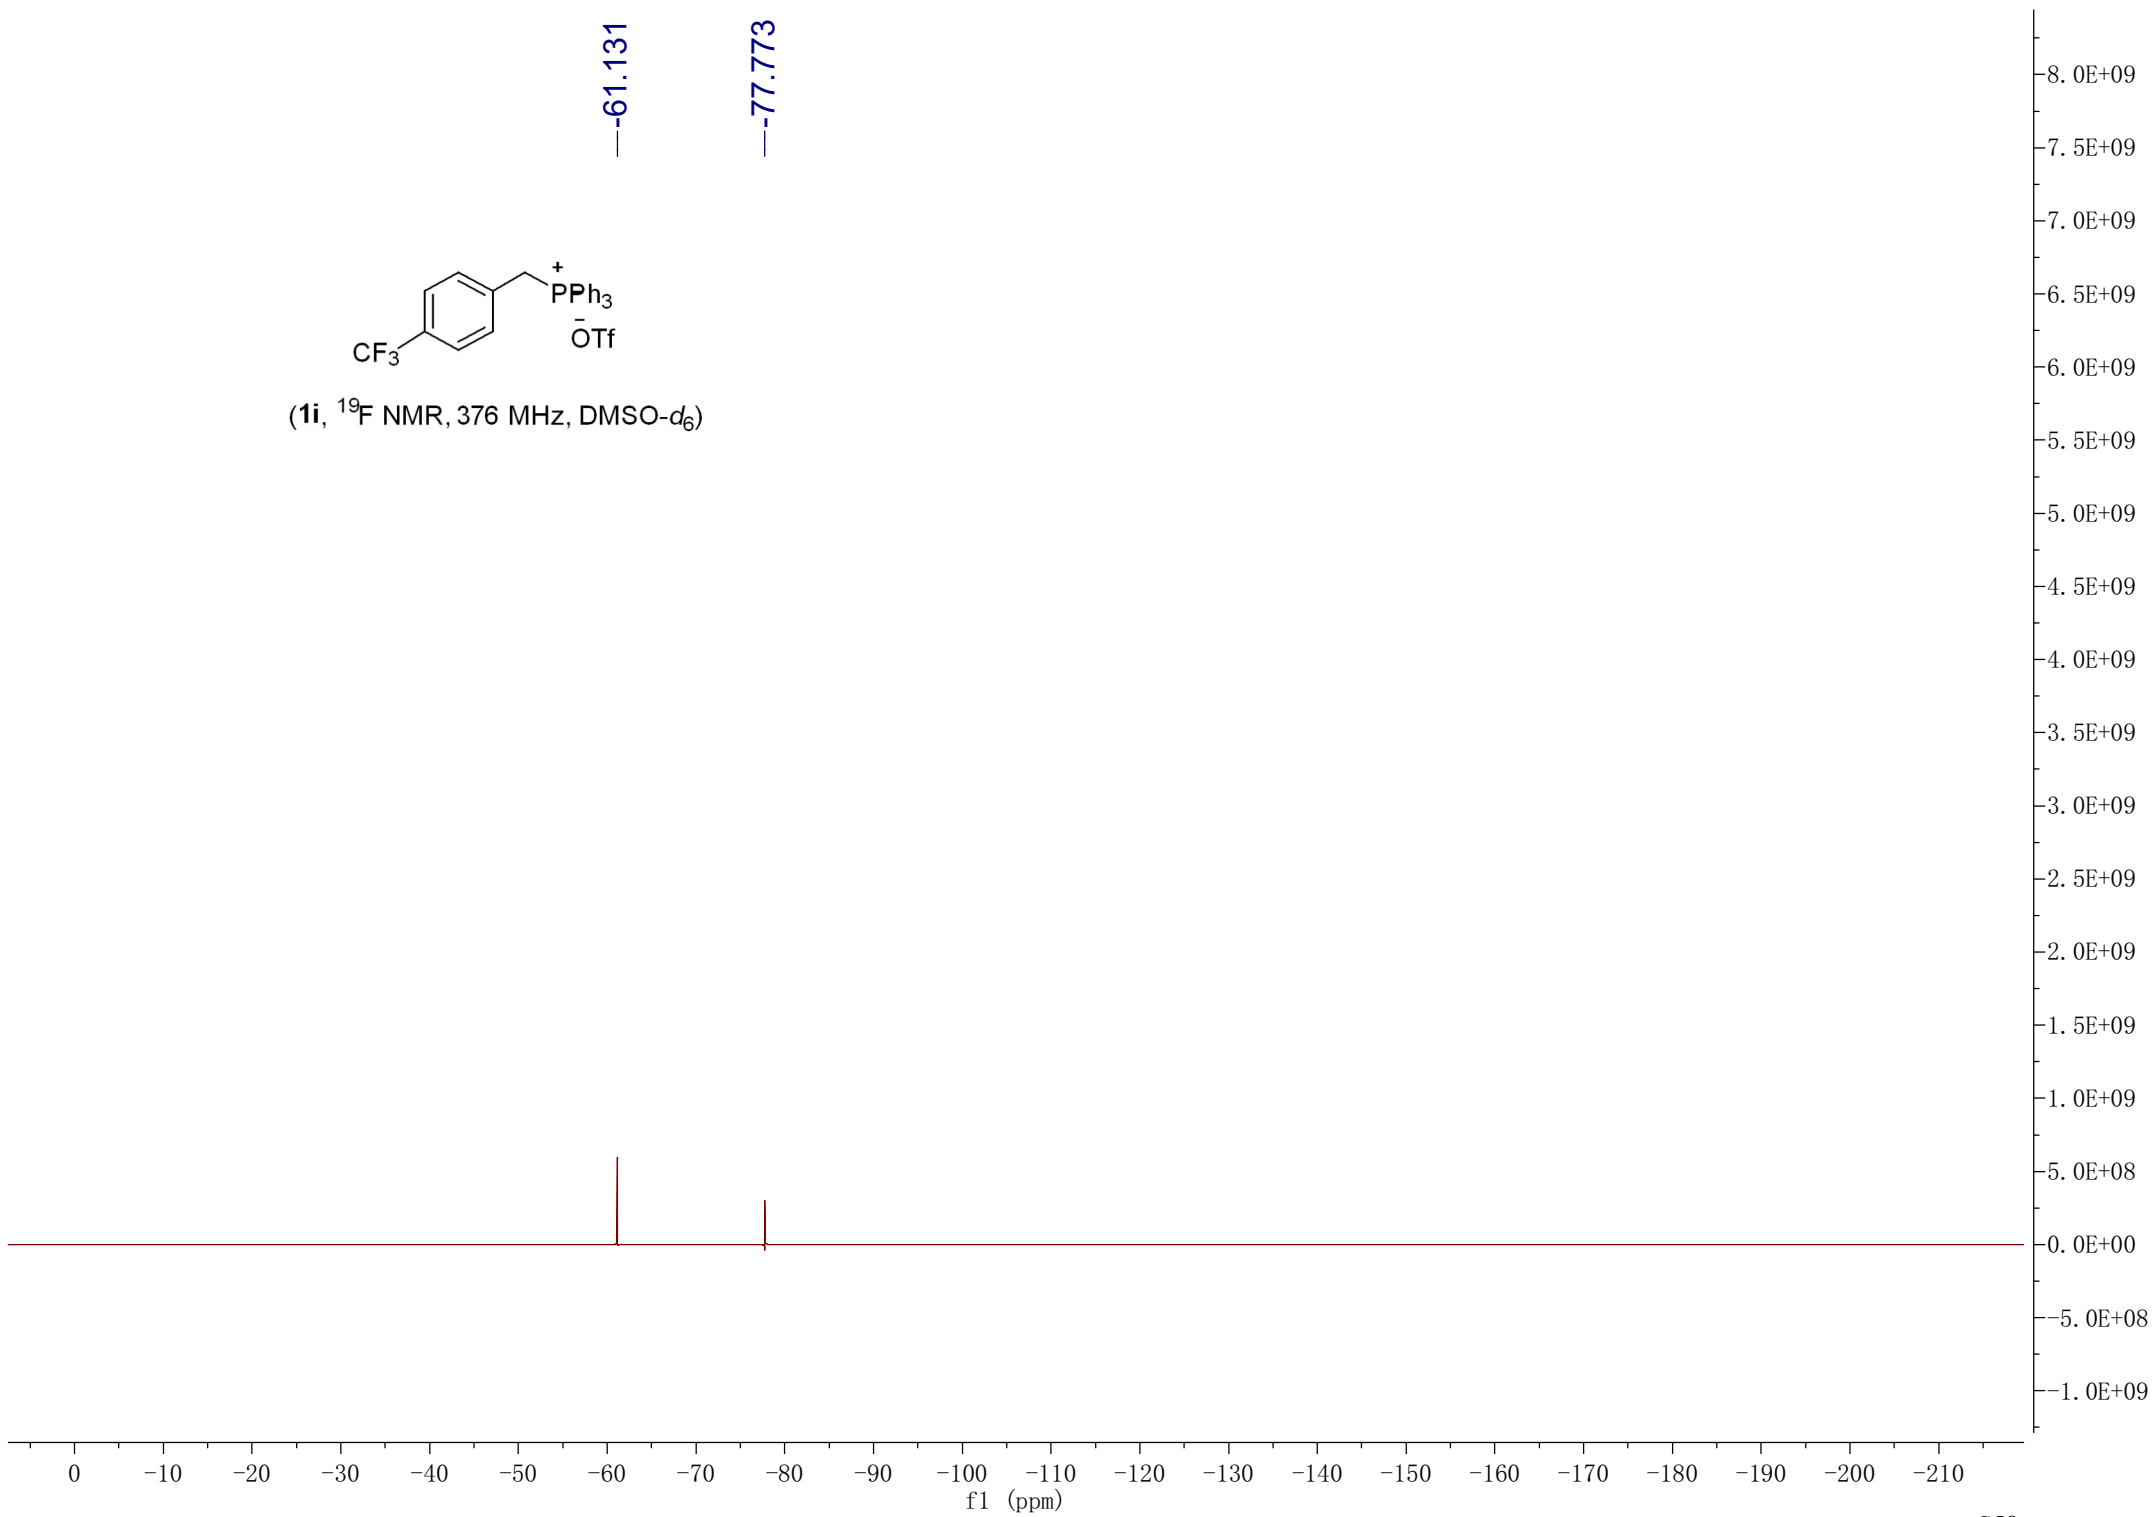

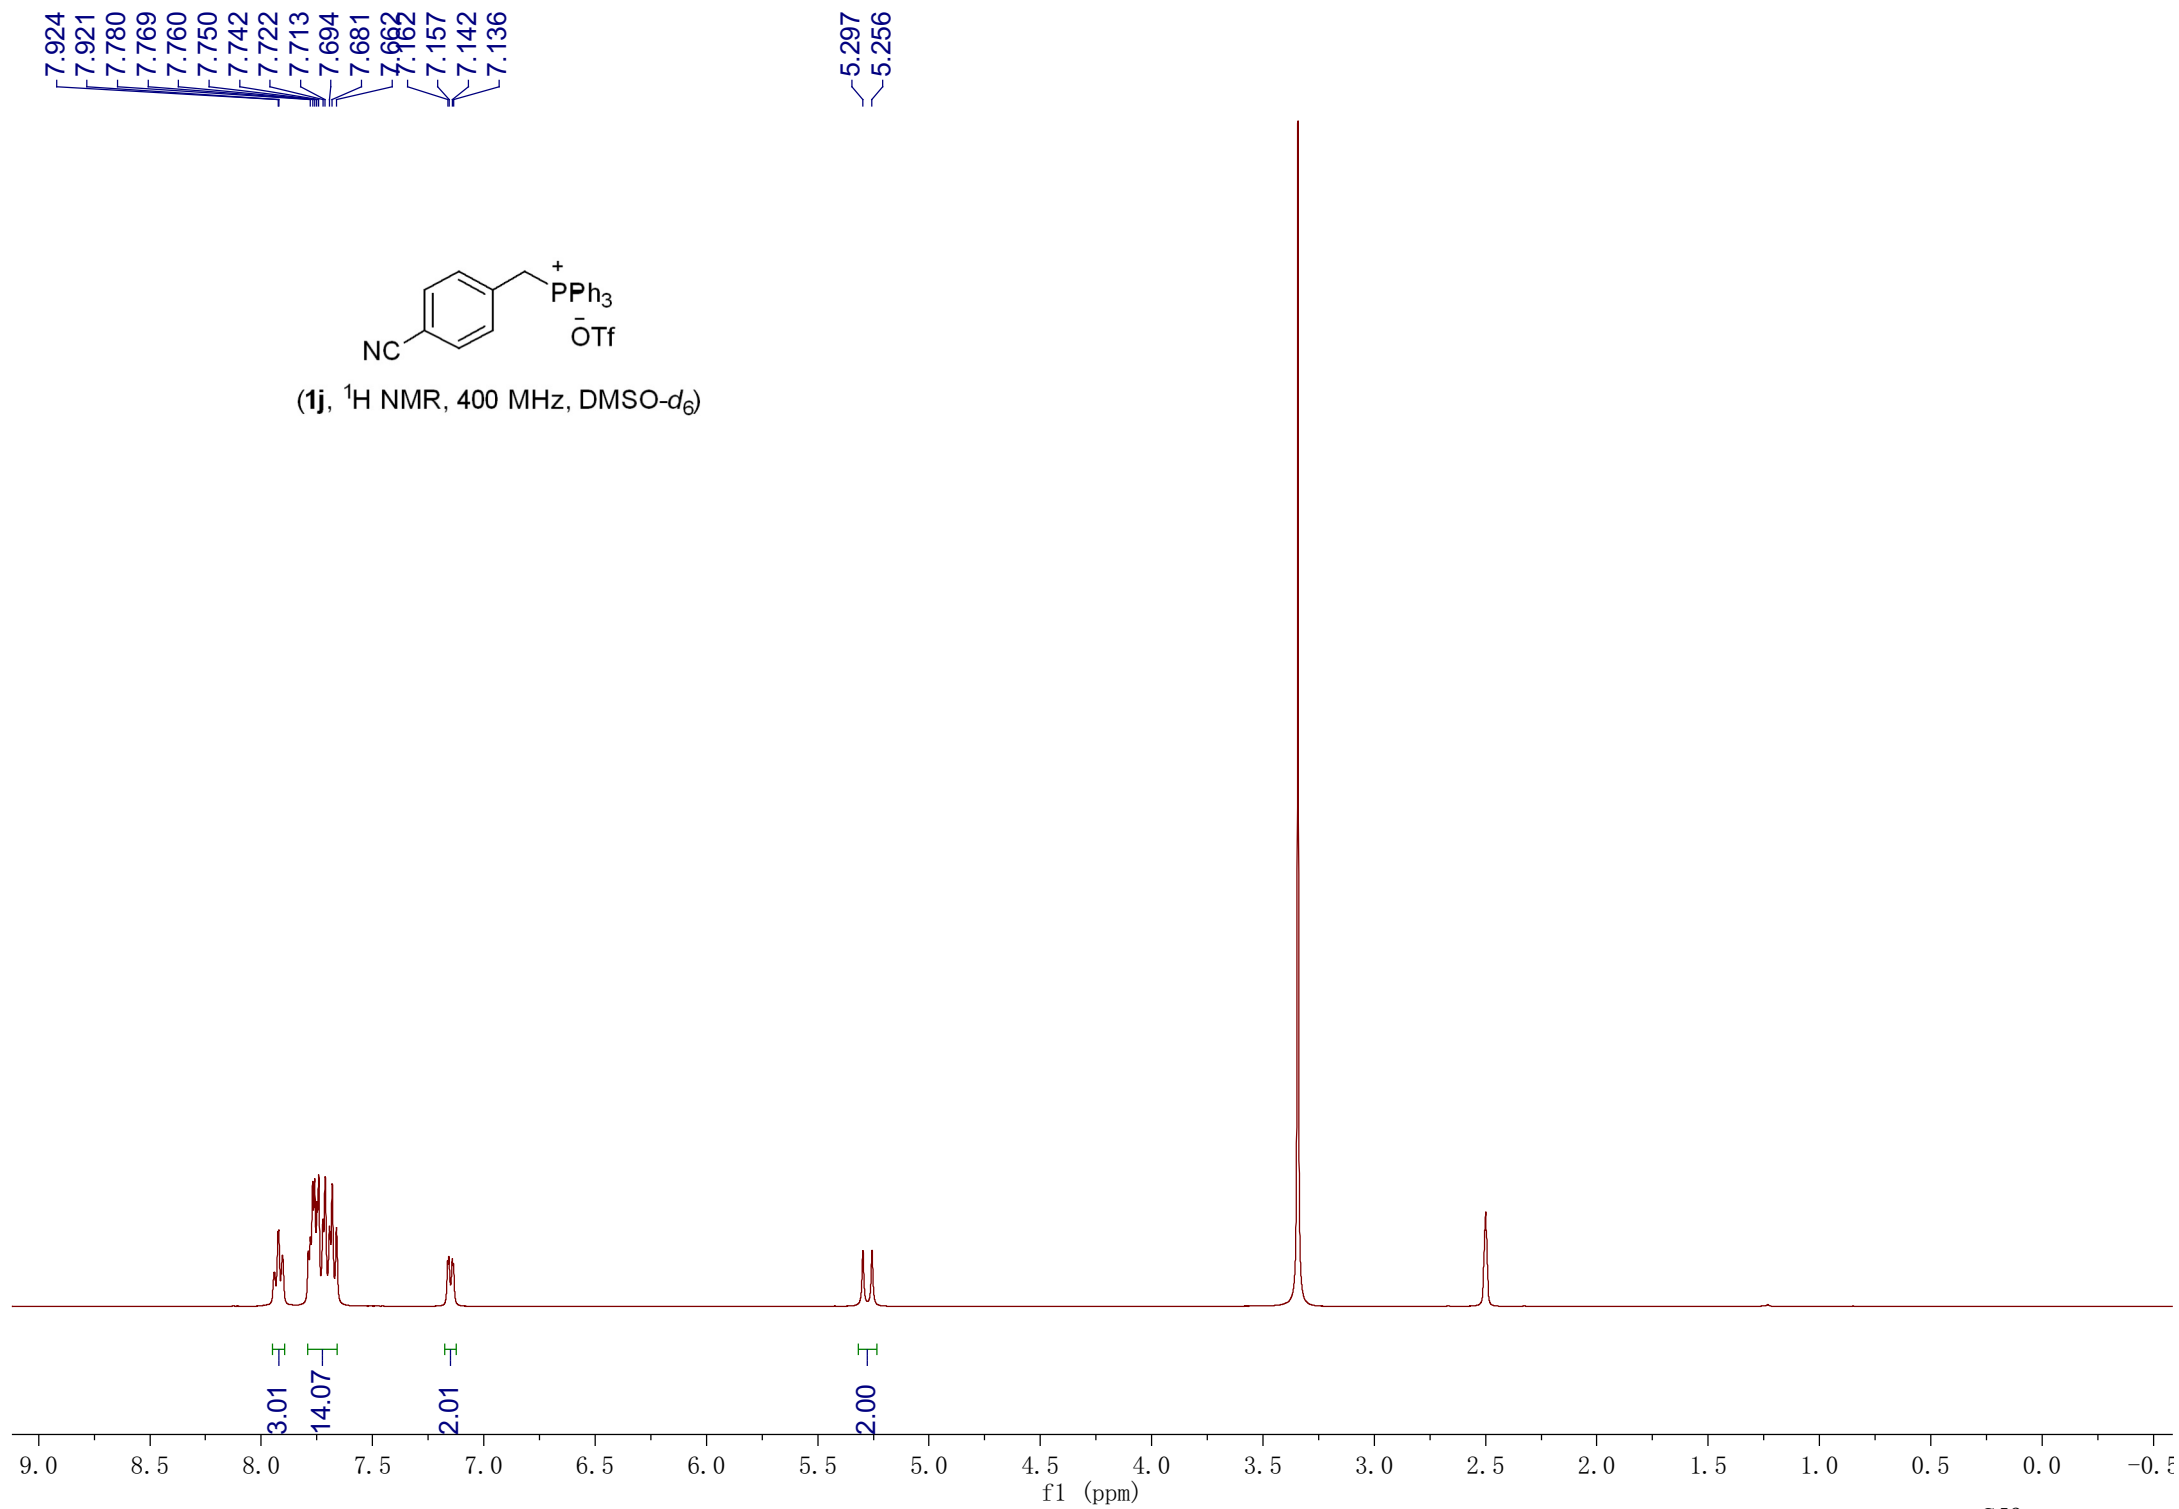

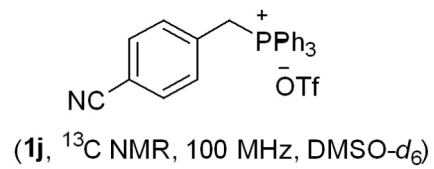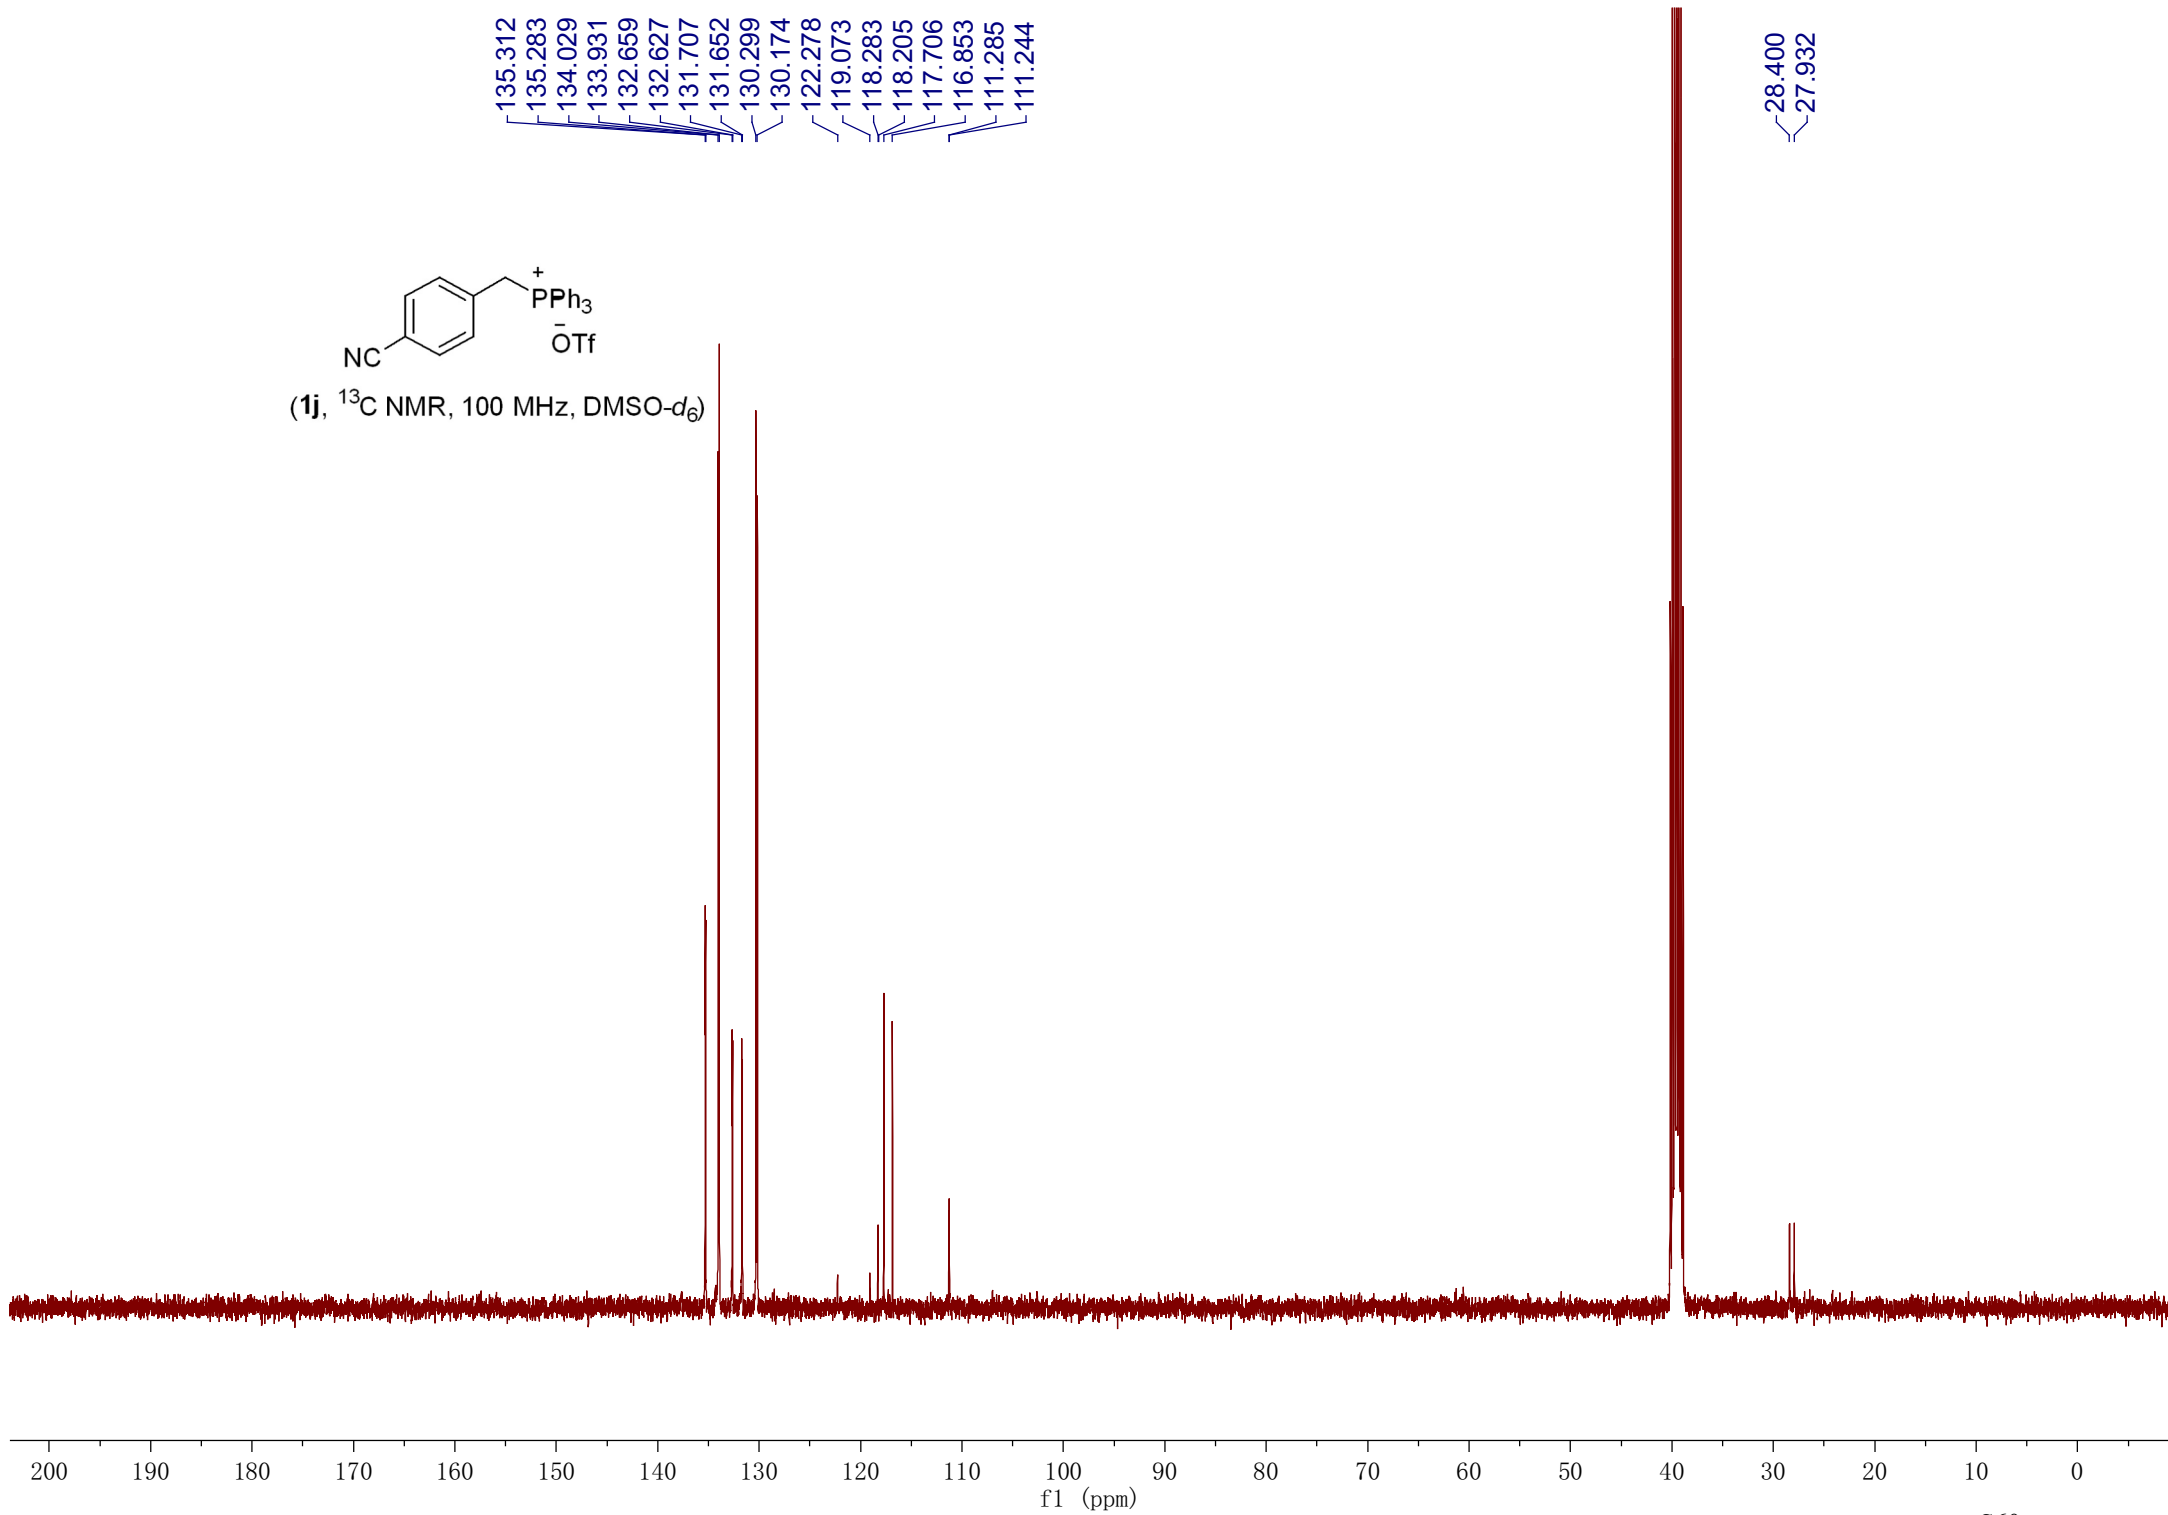

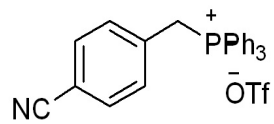

(**1j**,  $^{31}\text{P}$  NMR, 162 MHz,  $\text{DMSO-}d_6$ )

—23.500

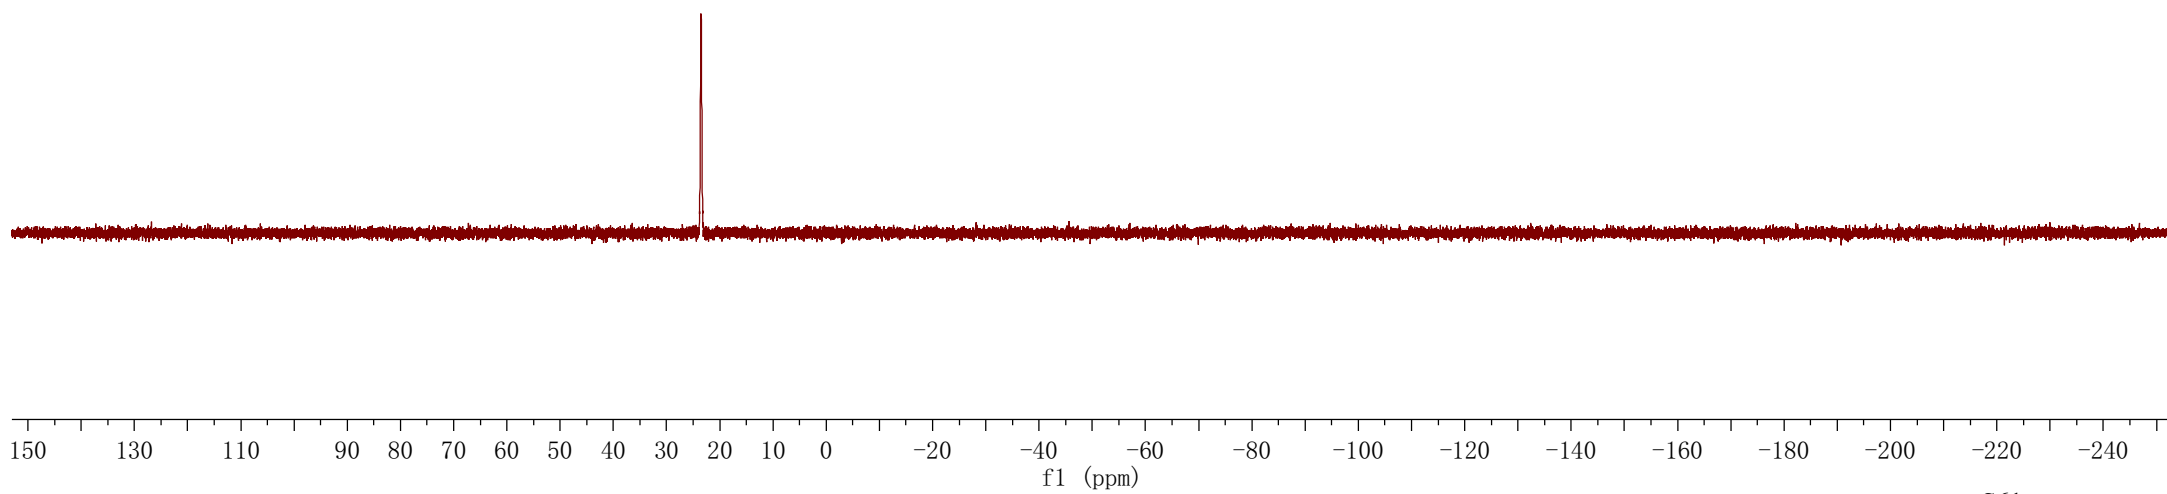

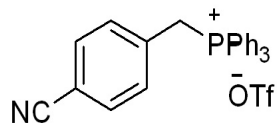

(1j,  $^{19}\text{F}$  NMR, 376 MHz,  $\text{DMSO-}d_6$ )

— -77.736

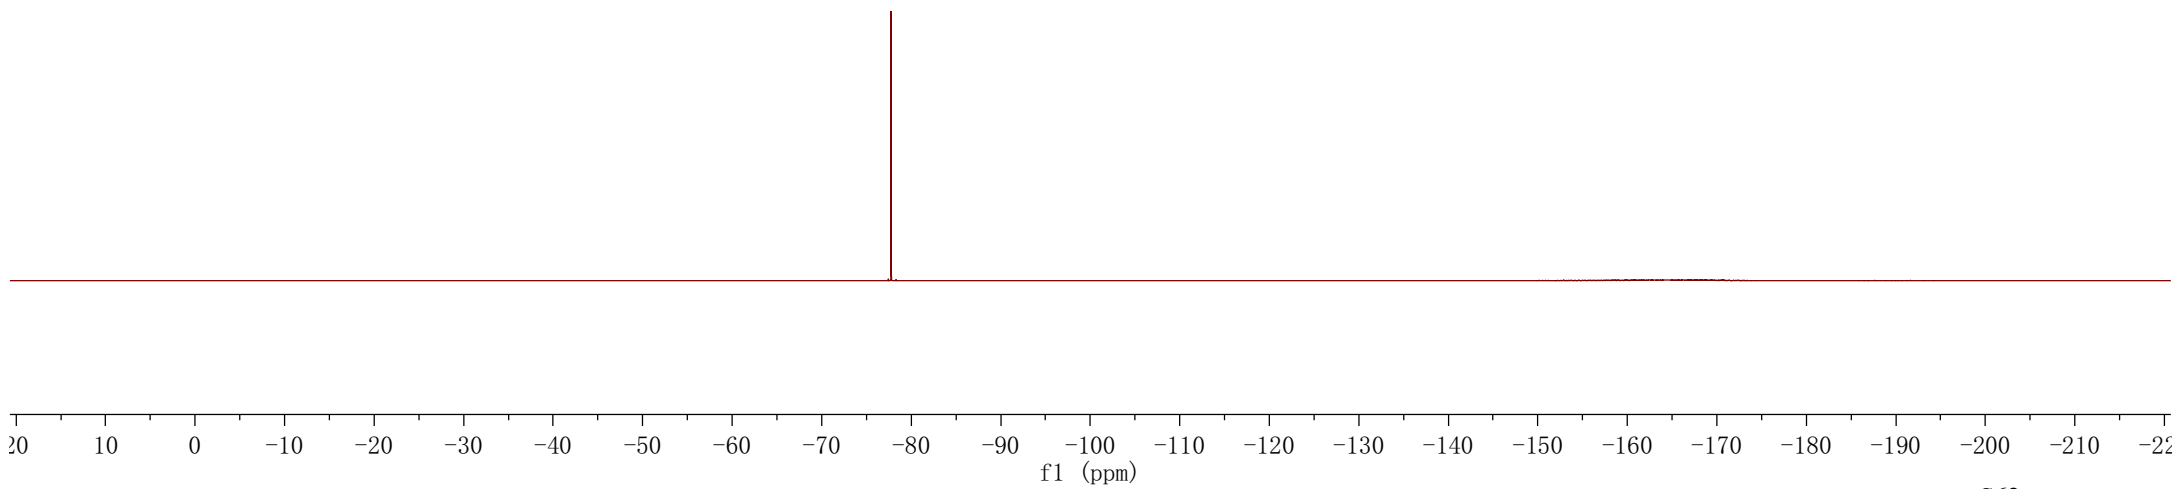

7.927  
7.910  
7.826  
7.806  
7.792  
7.773  
7.765  
7.755  
7.746  
7.723  
7.702  
7.692  
7.672  
7.652  
7.122

5.292  
5.252

3.824

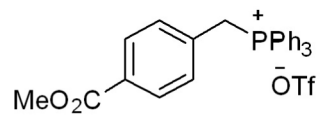

(**1k**, <sup>1</sup>H NMR, 400 MHz, DMSO-*d*<sub>6</sub>)

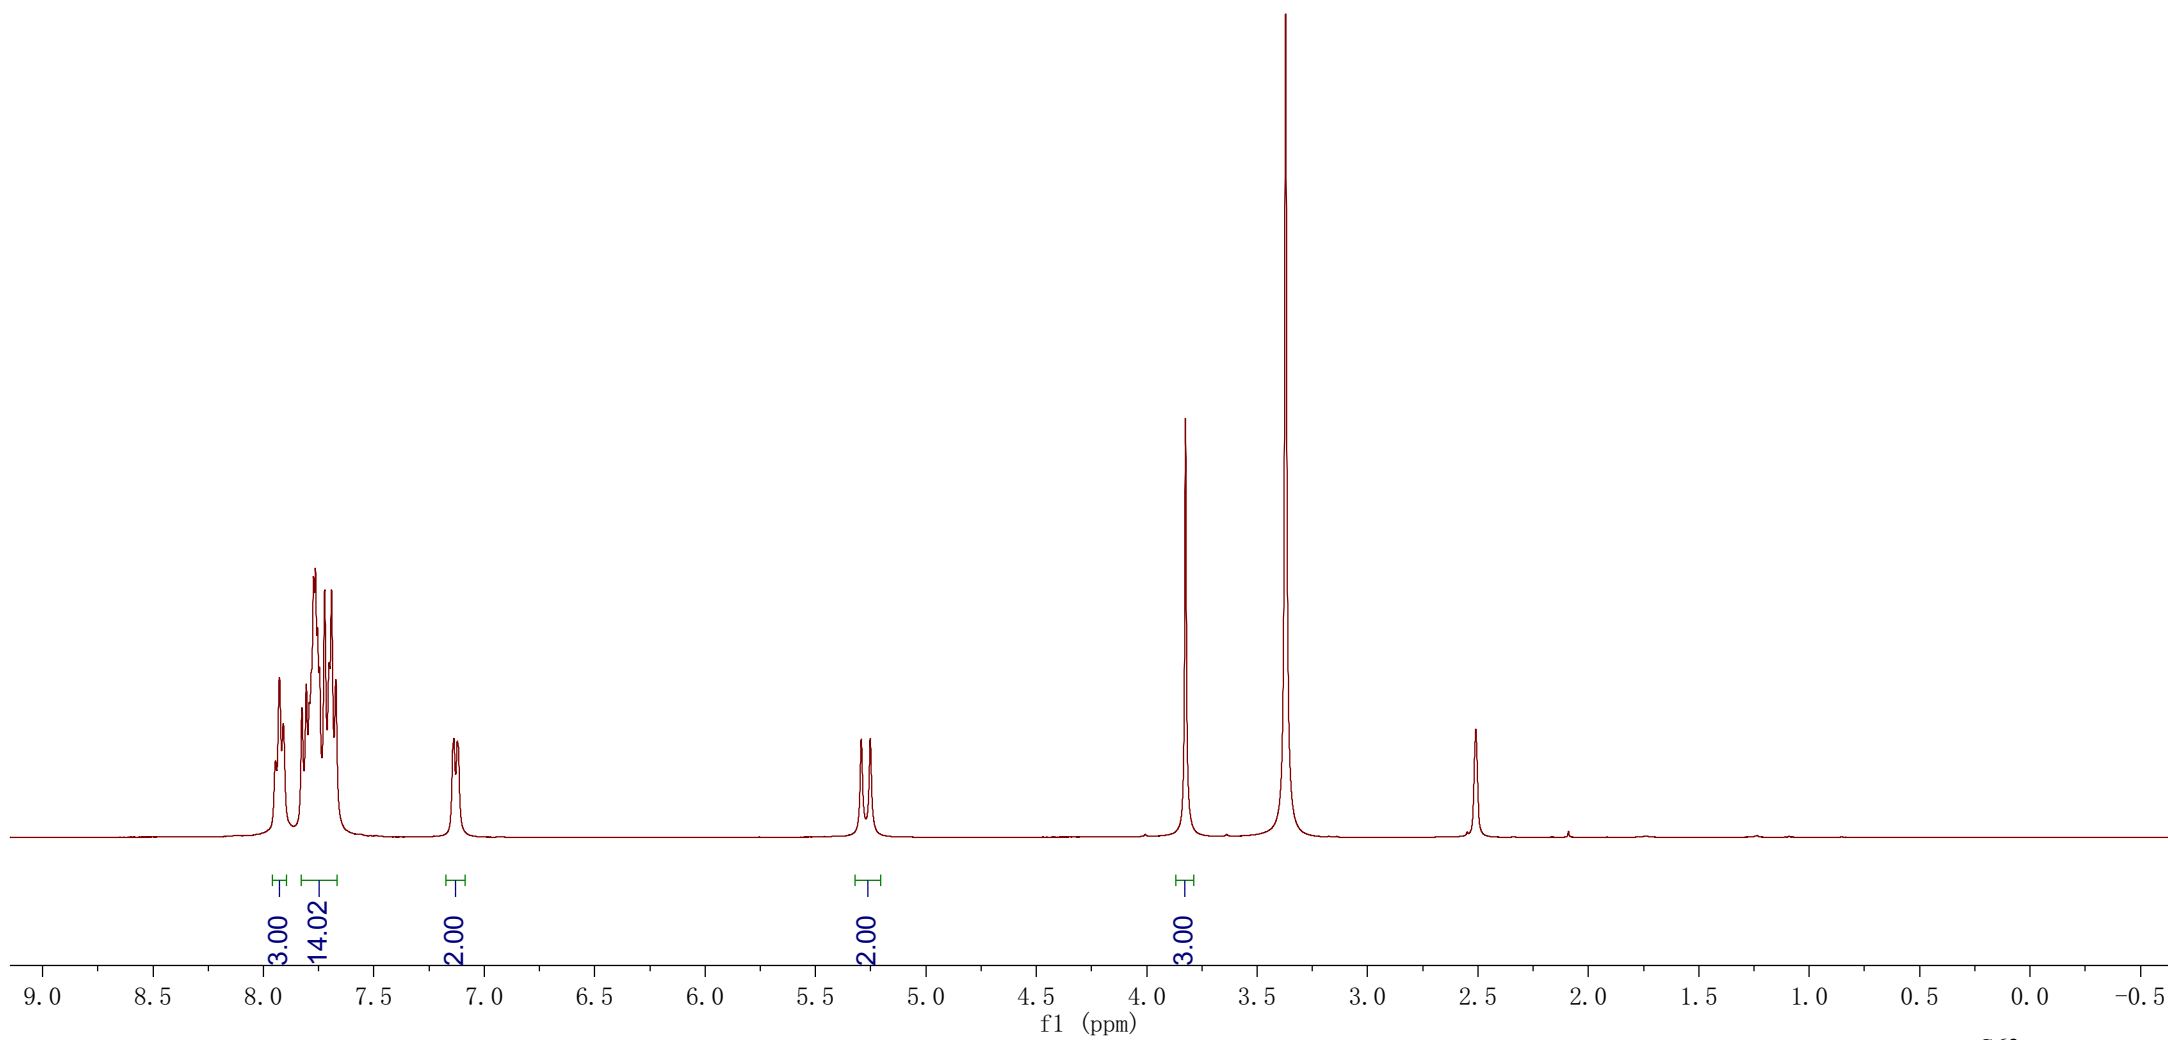

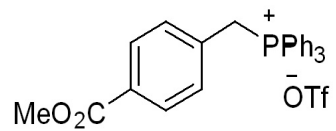

(1k,  $^{13}\text{C}$  NMR, 100 MHz, DMSO- $d_6$ )

165.646  
165.636  
135.233  
135.207  
134.028  
133.929  
133.622  
131.210  
131.156  
130.246  
130.121  
129.479  
129.454  
122.285  
119.083  
117.893  
117.040

52.201

28.411  
27.945

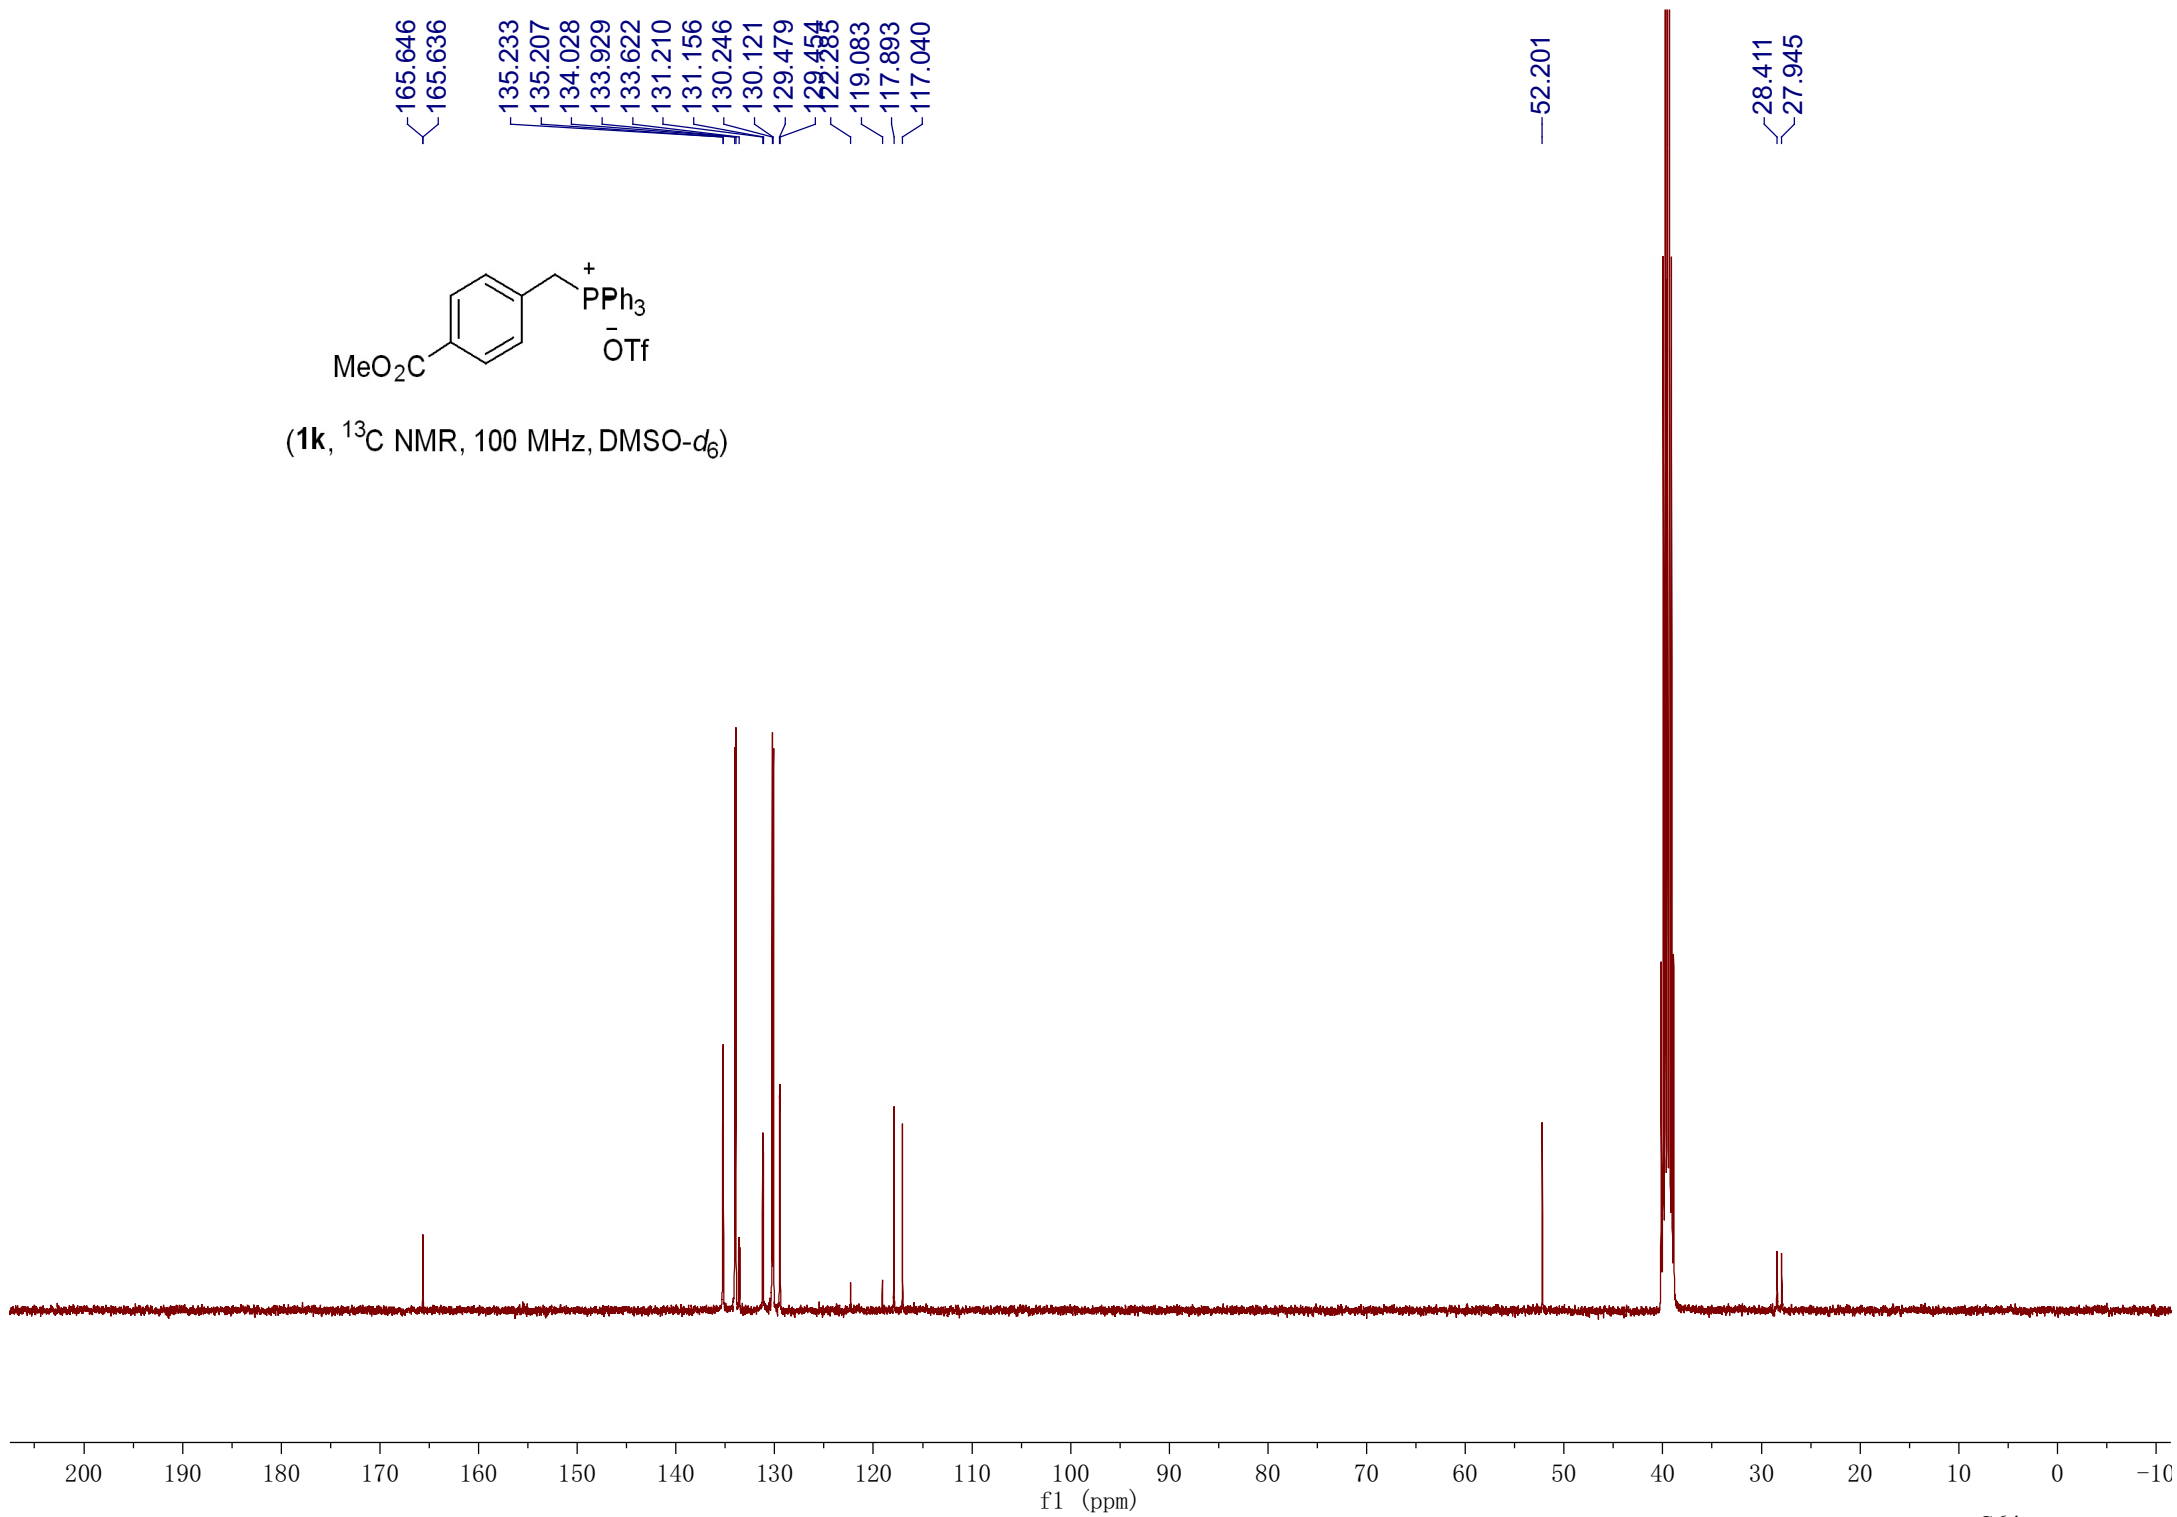



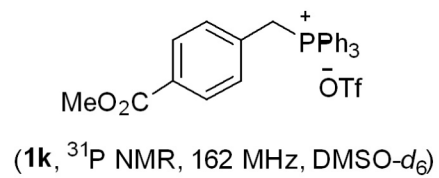

—23.335

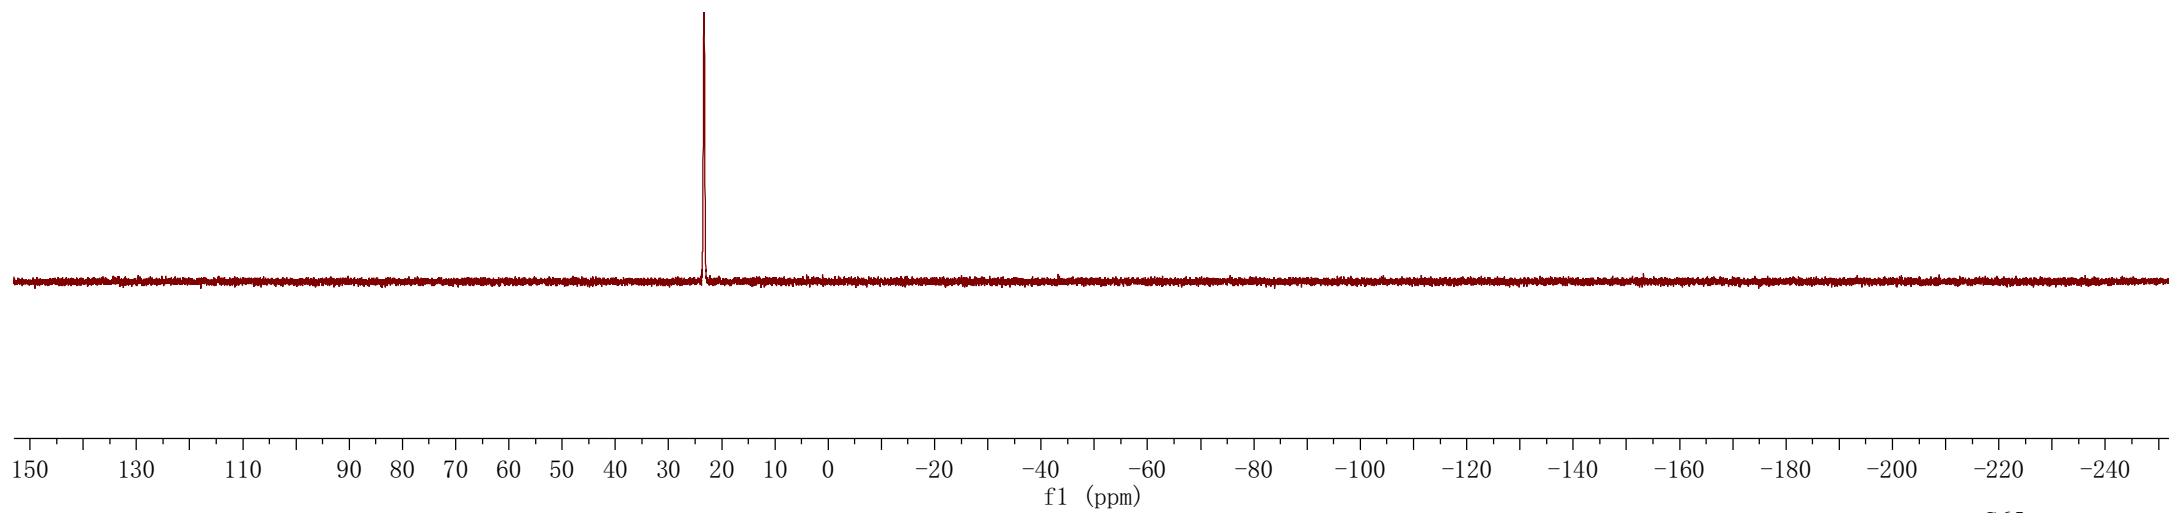

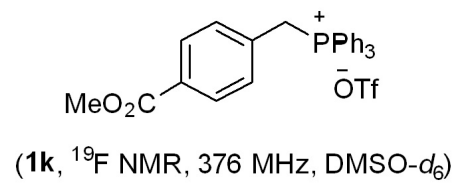

— -77.729

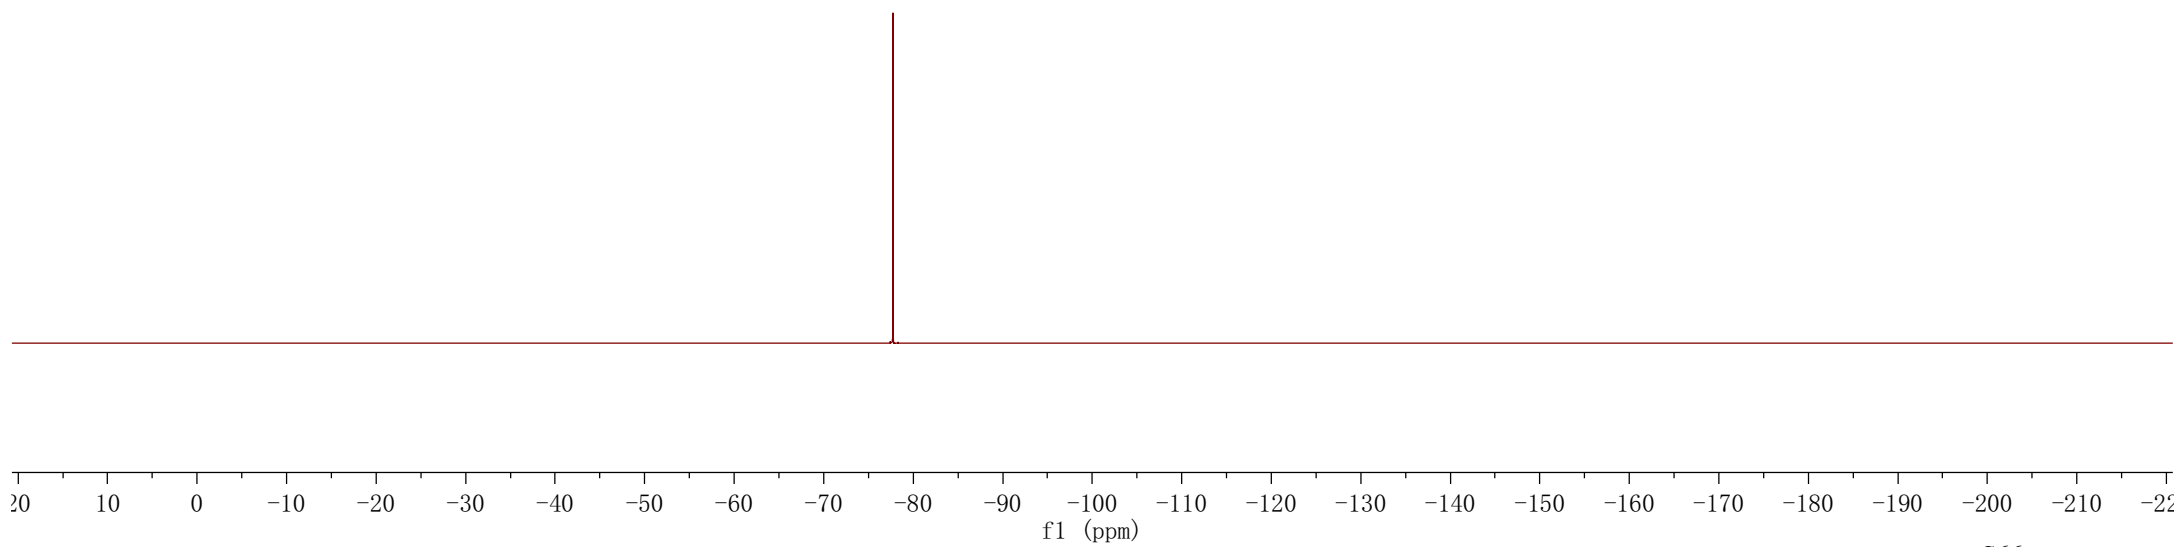

7.924  
7.921  
7.760  
7.751  
7.740  
7.732  
7.721  
7.712  
7.642  
7.623  
7.611  
7.592  
7.552  
7.233  
7.214  
7.123  
7.104  
7.066  
7.047  
7.029  
6.948  
6.927

5.014  
4.977

1.642

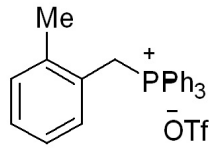

(11,  $^1\text{H}$  NMR, 400 MHz,  $\text{DMSO-}d_6$ )

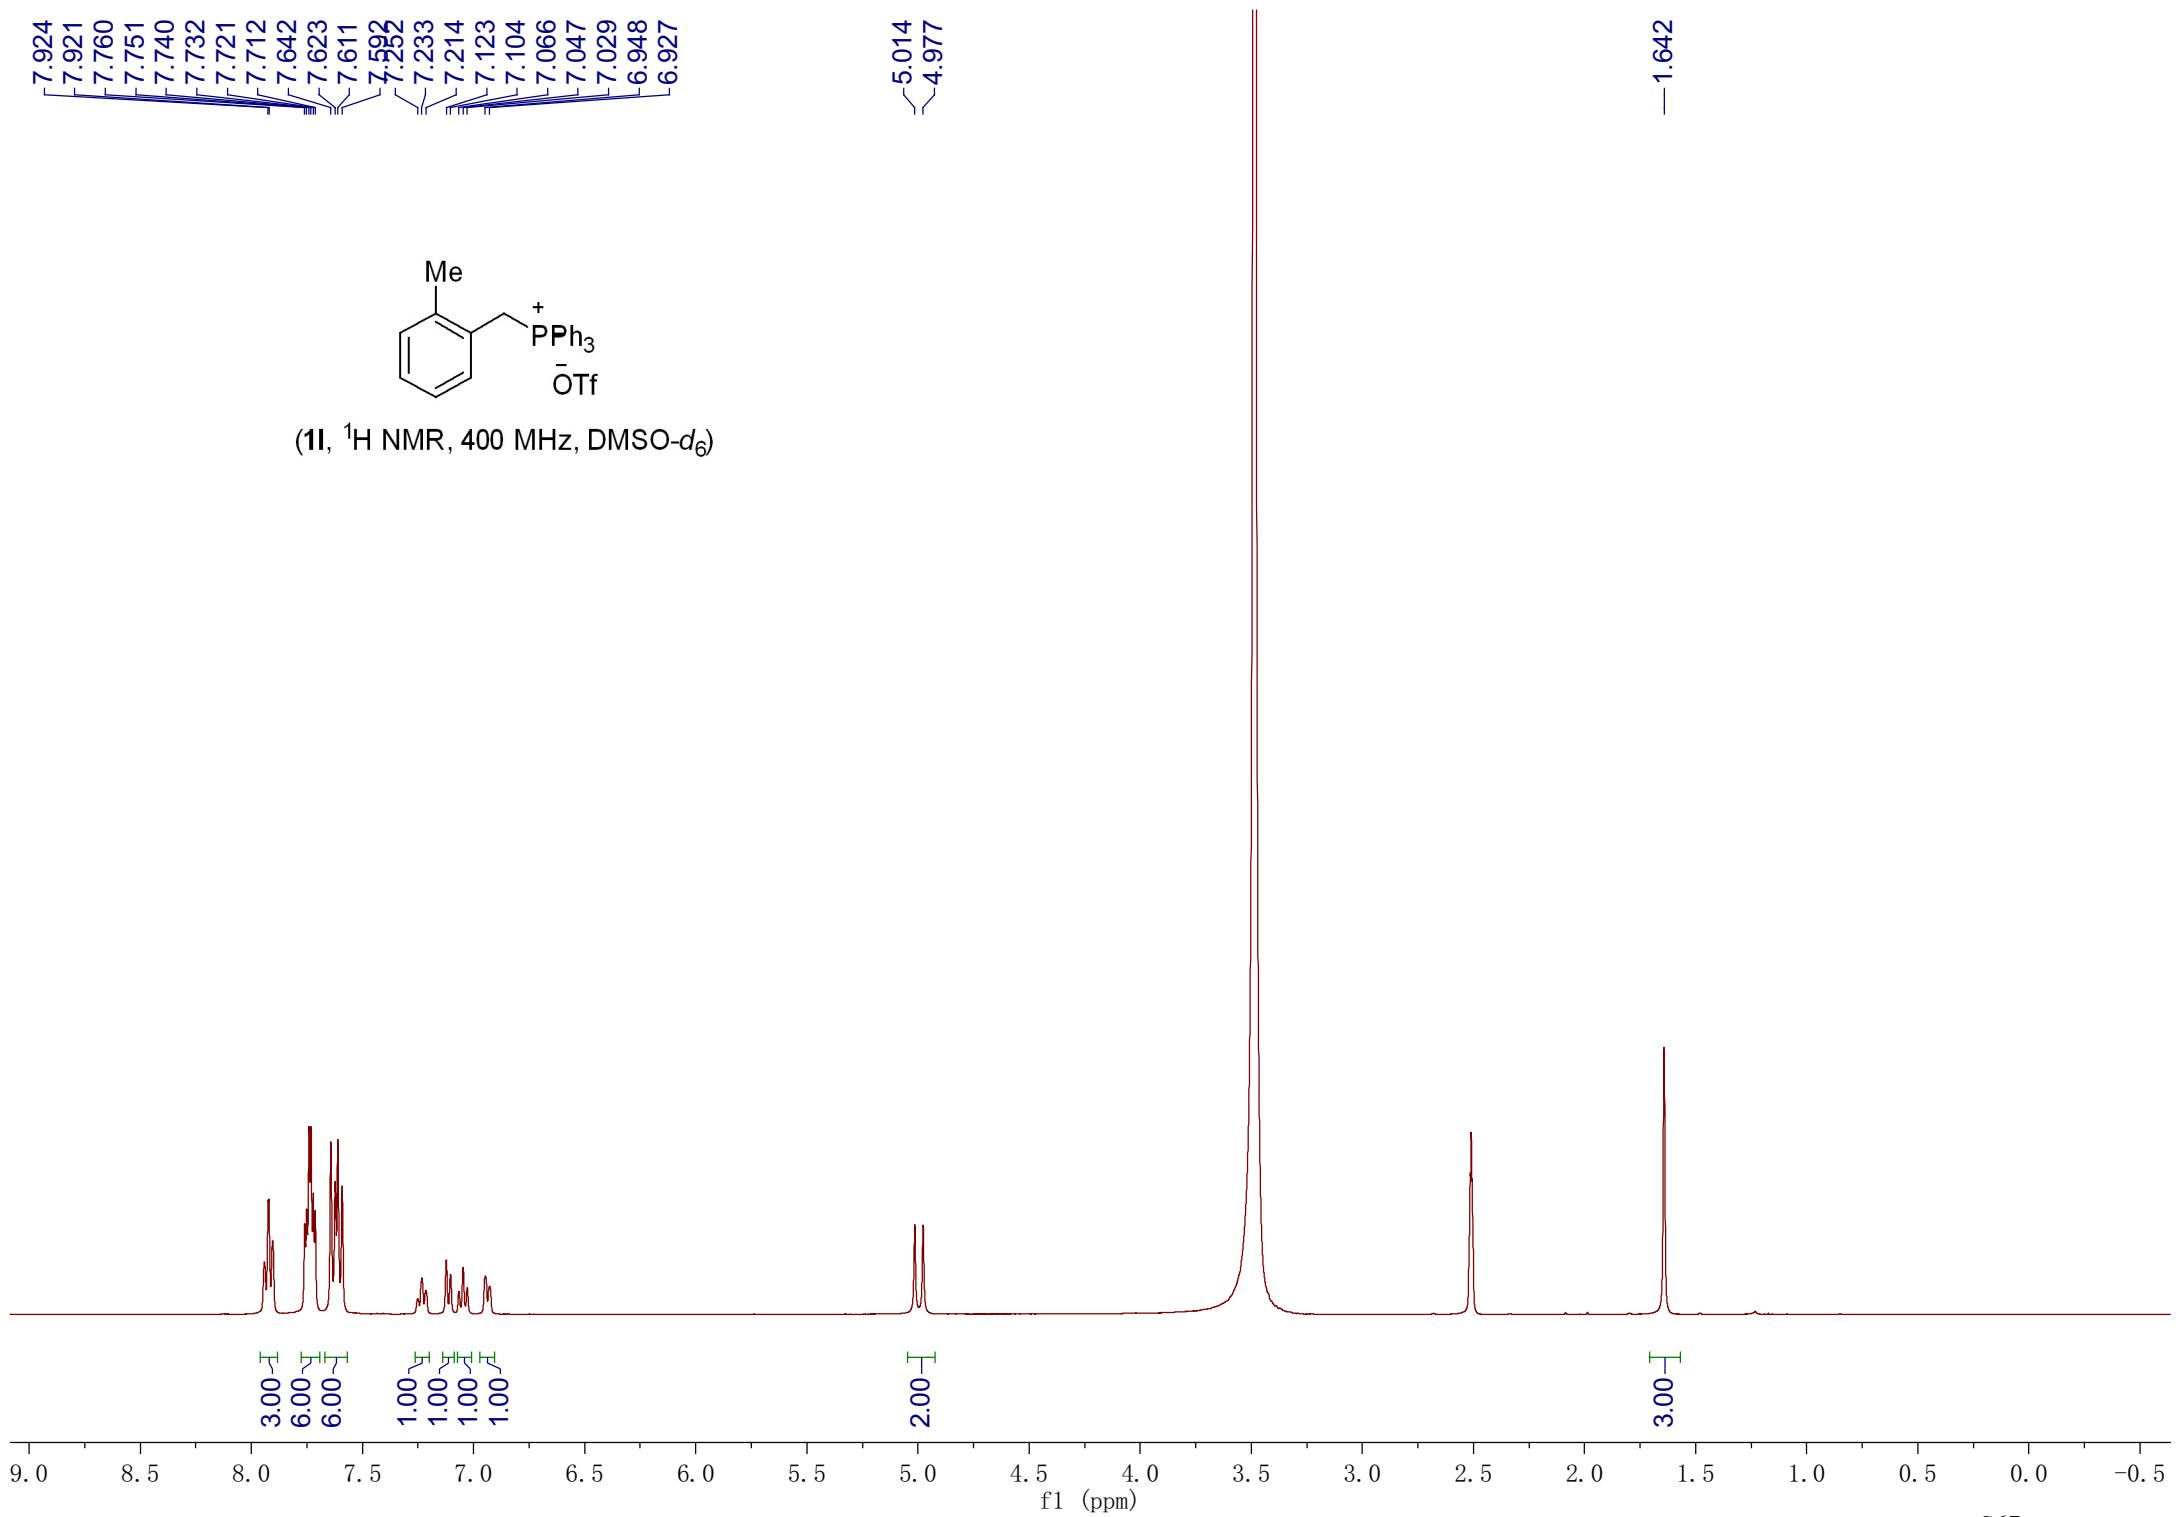

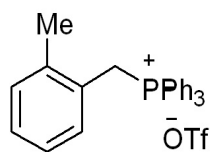

(11,  $^{13}\text{C}$  NMR, 100 MHz,  $\text{DMSO-}d_6$ )

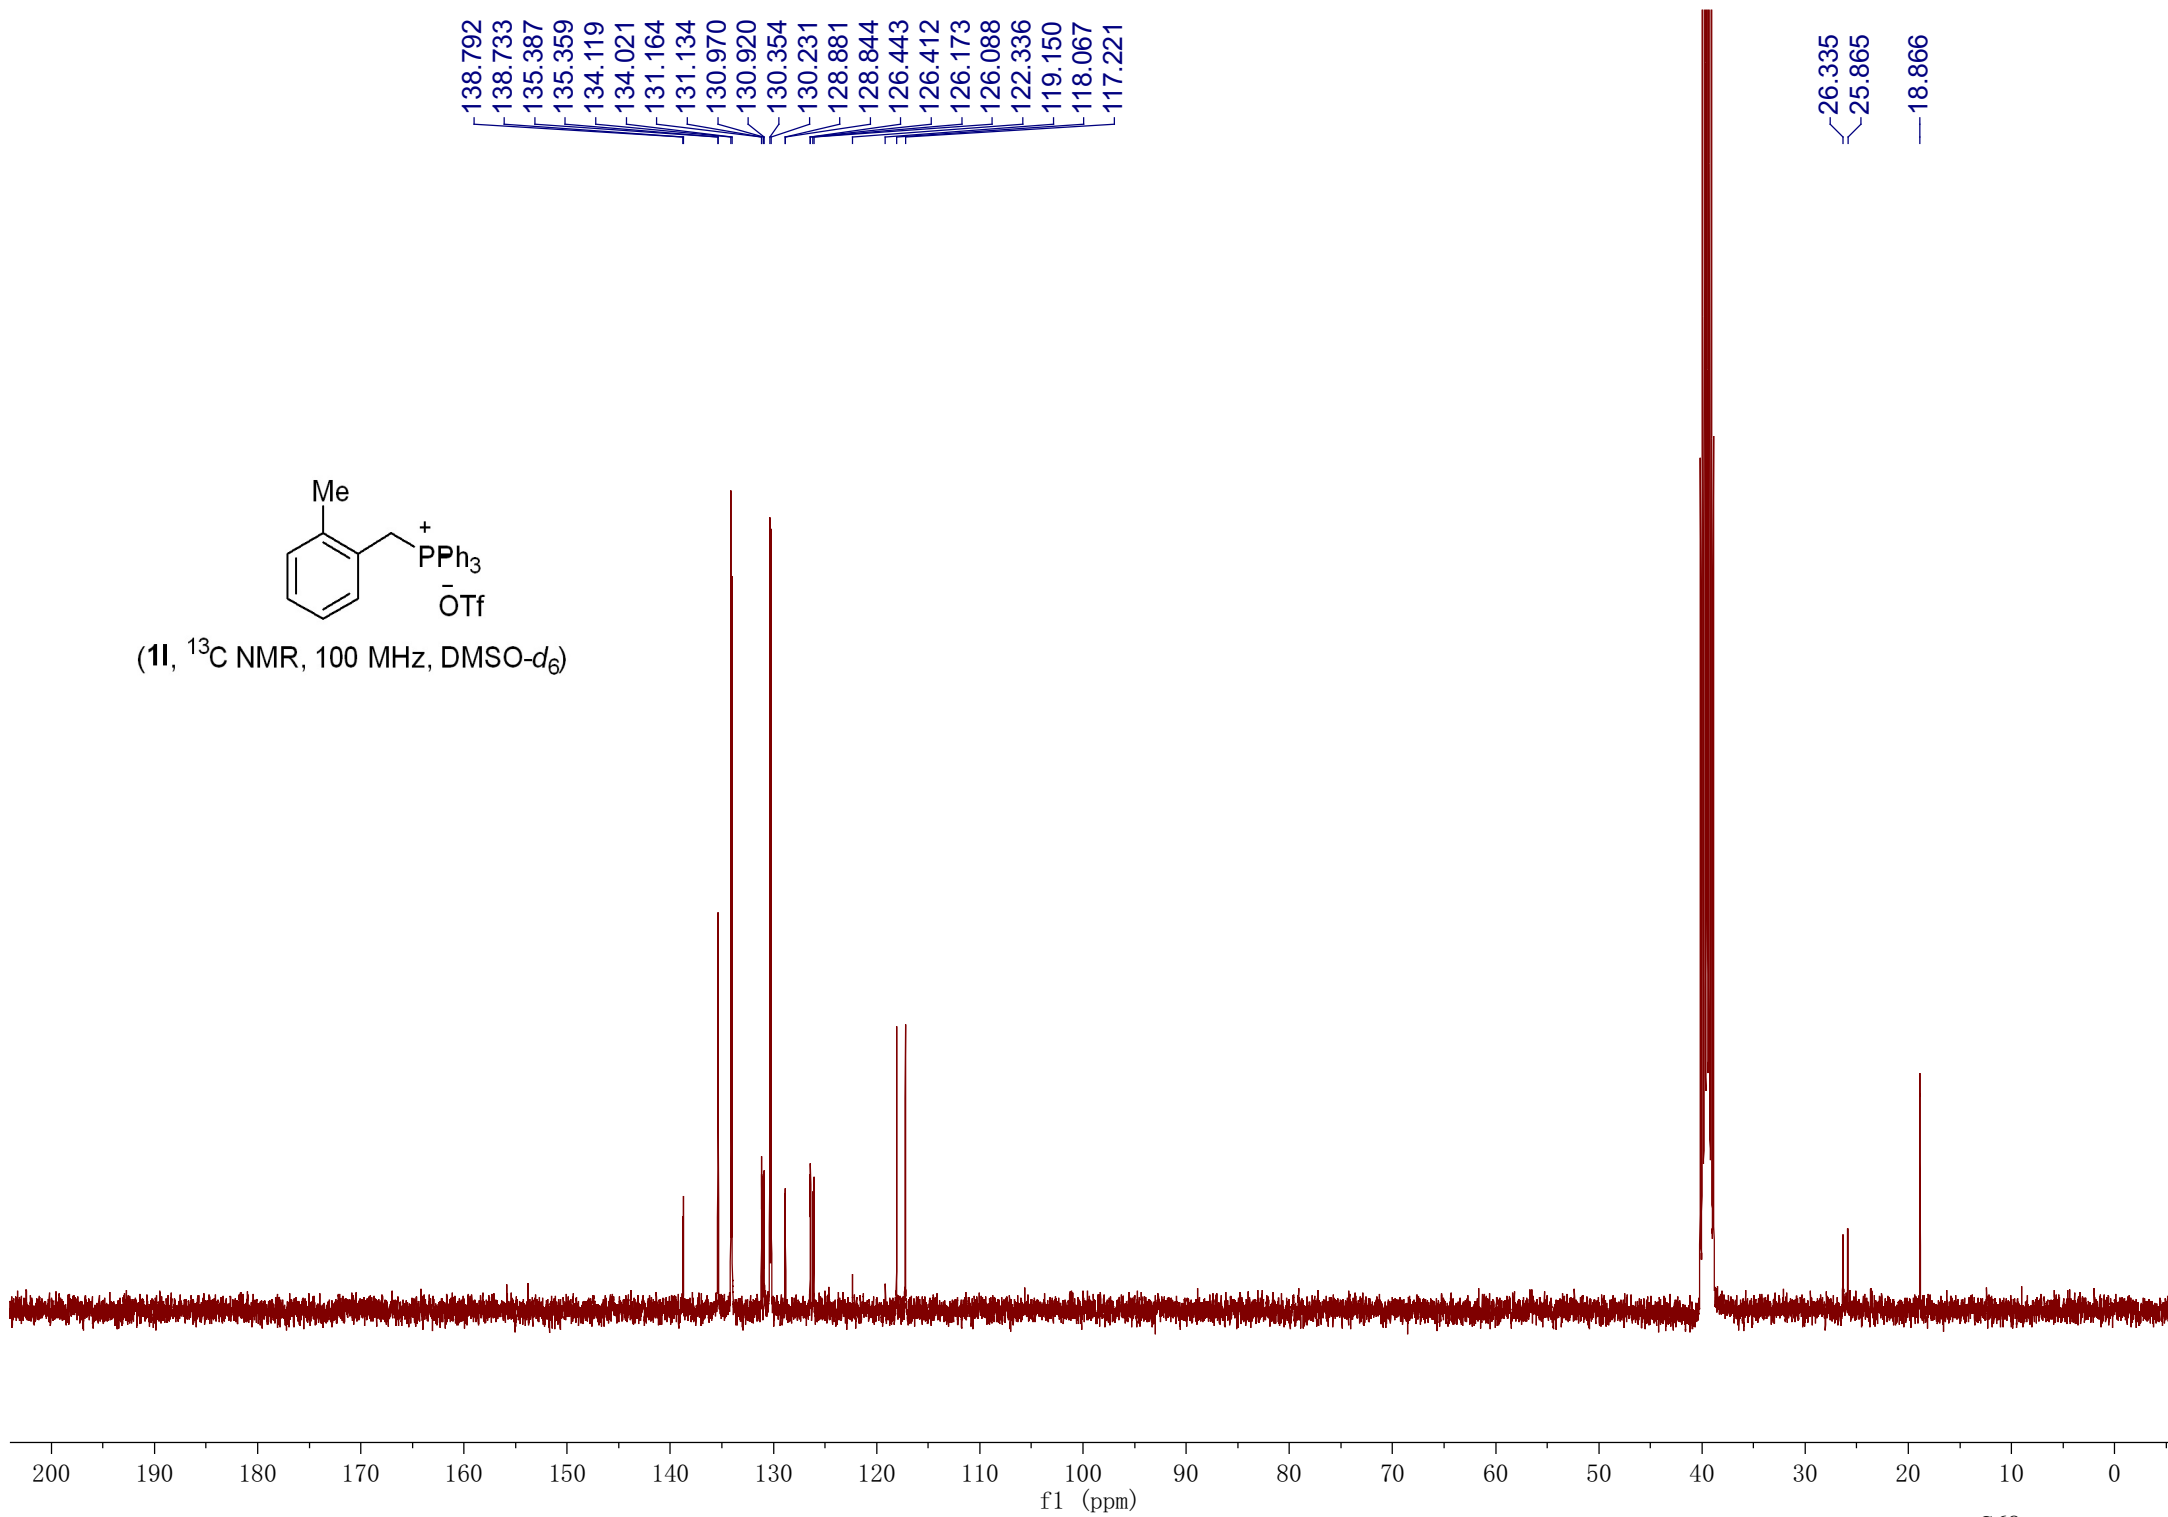

—22.260

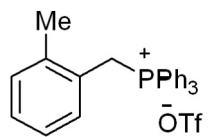

(**11**,  $^{31}\text{P}$  NMR, 162 MHz,  $\text{DMSO-}d_6$ )

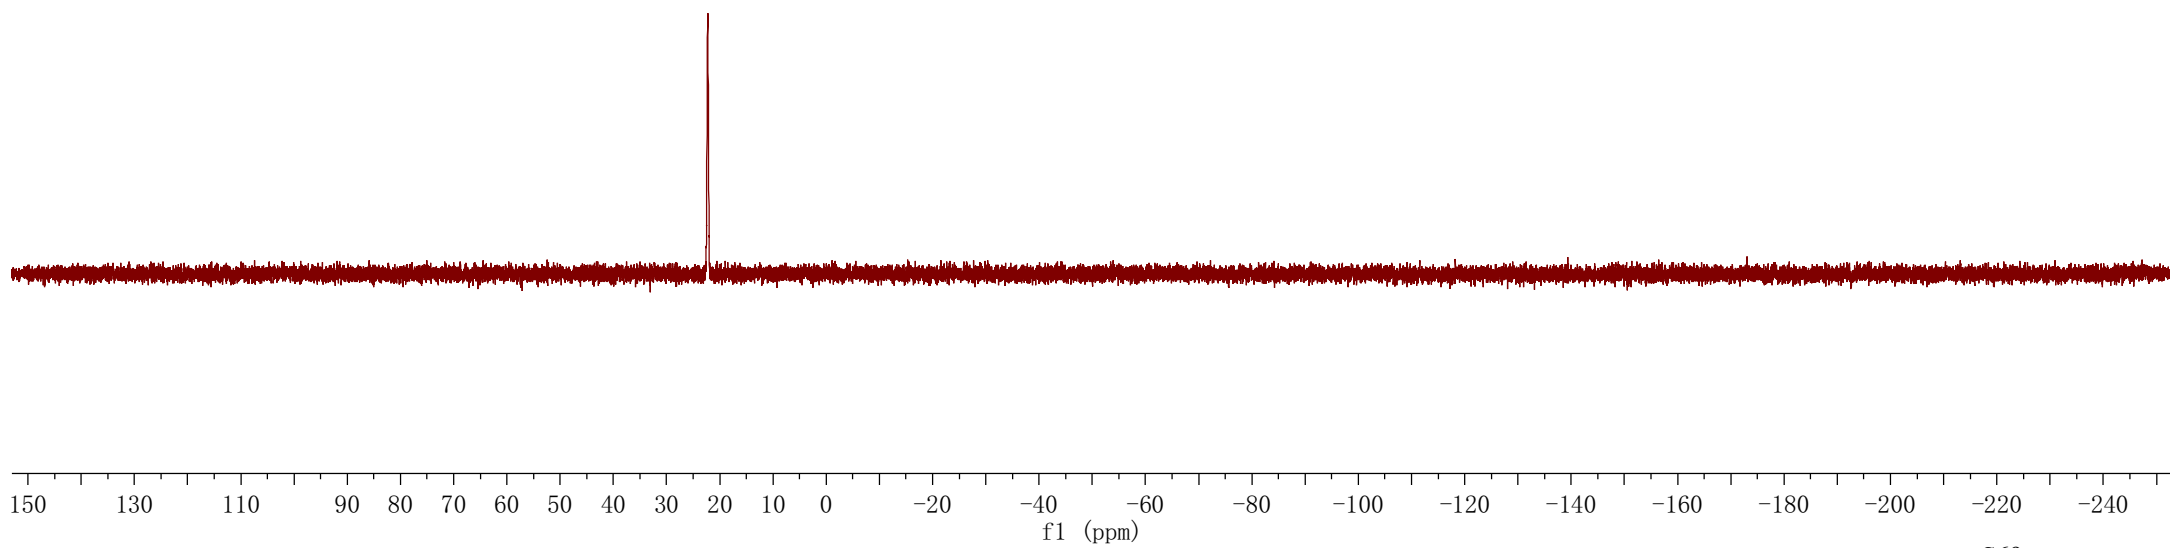

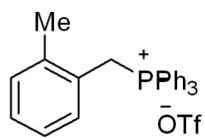

(**11**,  $^{19}\text{F}$  NMR, 376 MHz,  $\text{DMSO-}d_6$ )

— -77.754

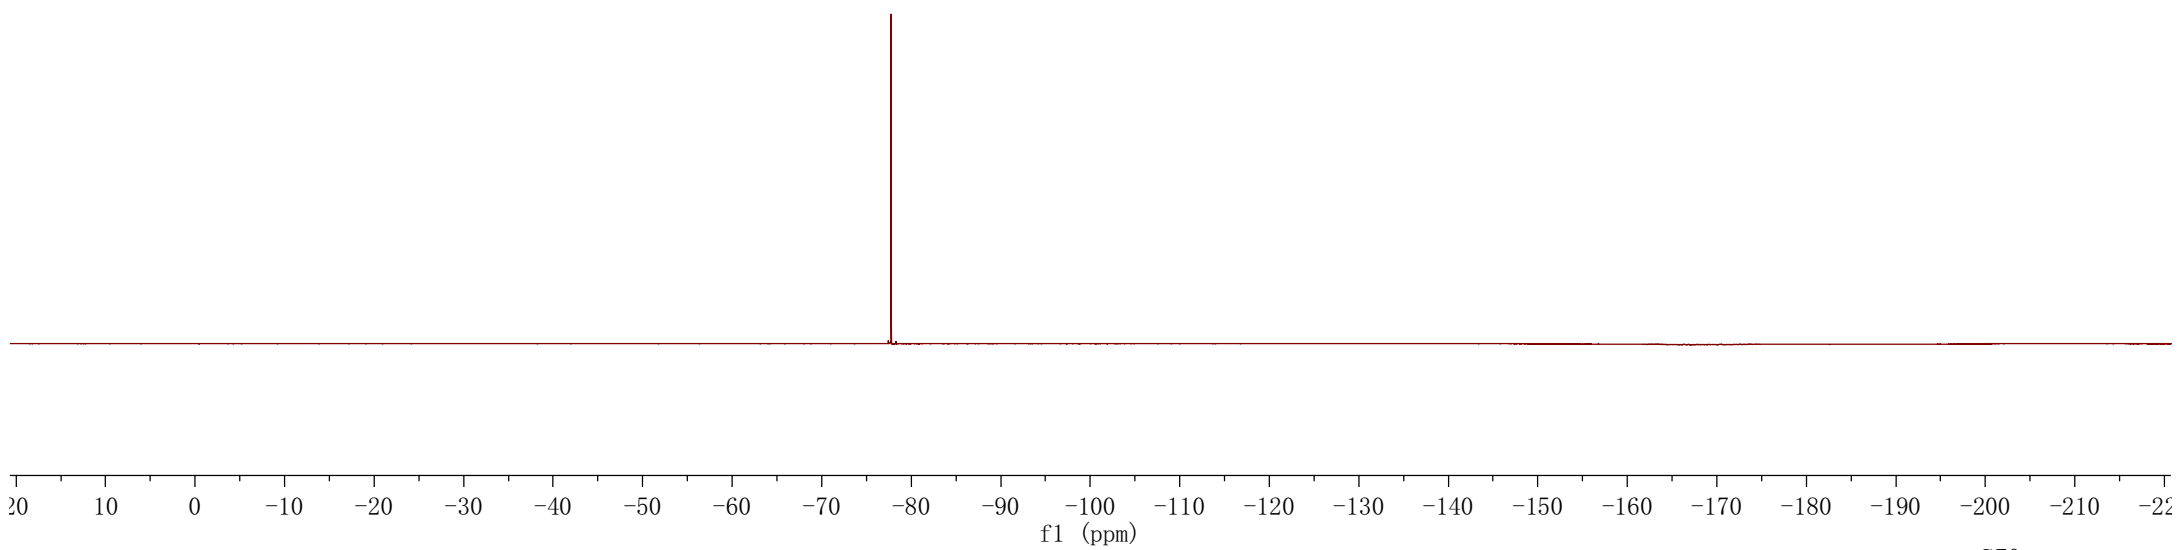

7.935  
7.916  
7.898  
7.758  
7.749  
7.738  
7.730  
7.719  
7.710  
7.635  
7.615  
7.604  
7.584  
7.313  
7.295  
7.276  
7.188  
7.169  
7.055  
7.036  
7.018  
6.931  
6.911

5.007  
4.969

1.982  
1.964  
1.945  
1.927

0.860  
0.841  
0.822

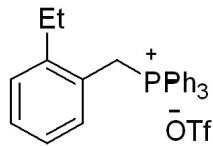

(1m, <sup>1</sup>H NMR, 400 MHz, DMSO-d<sub>6</sub>)

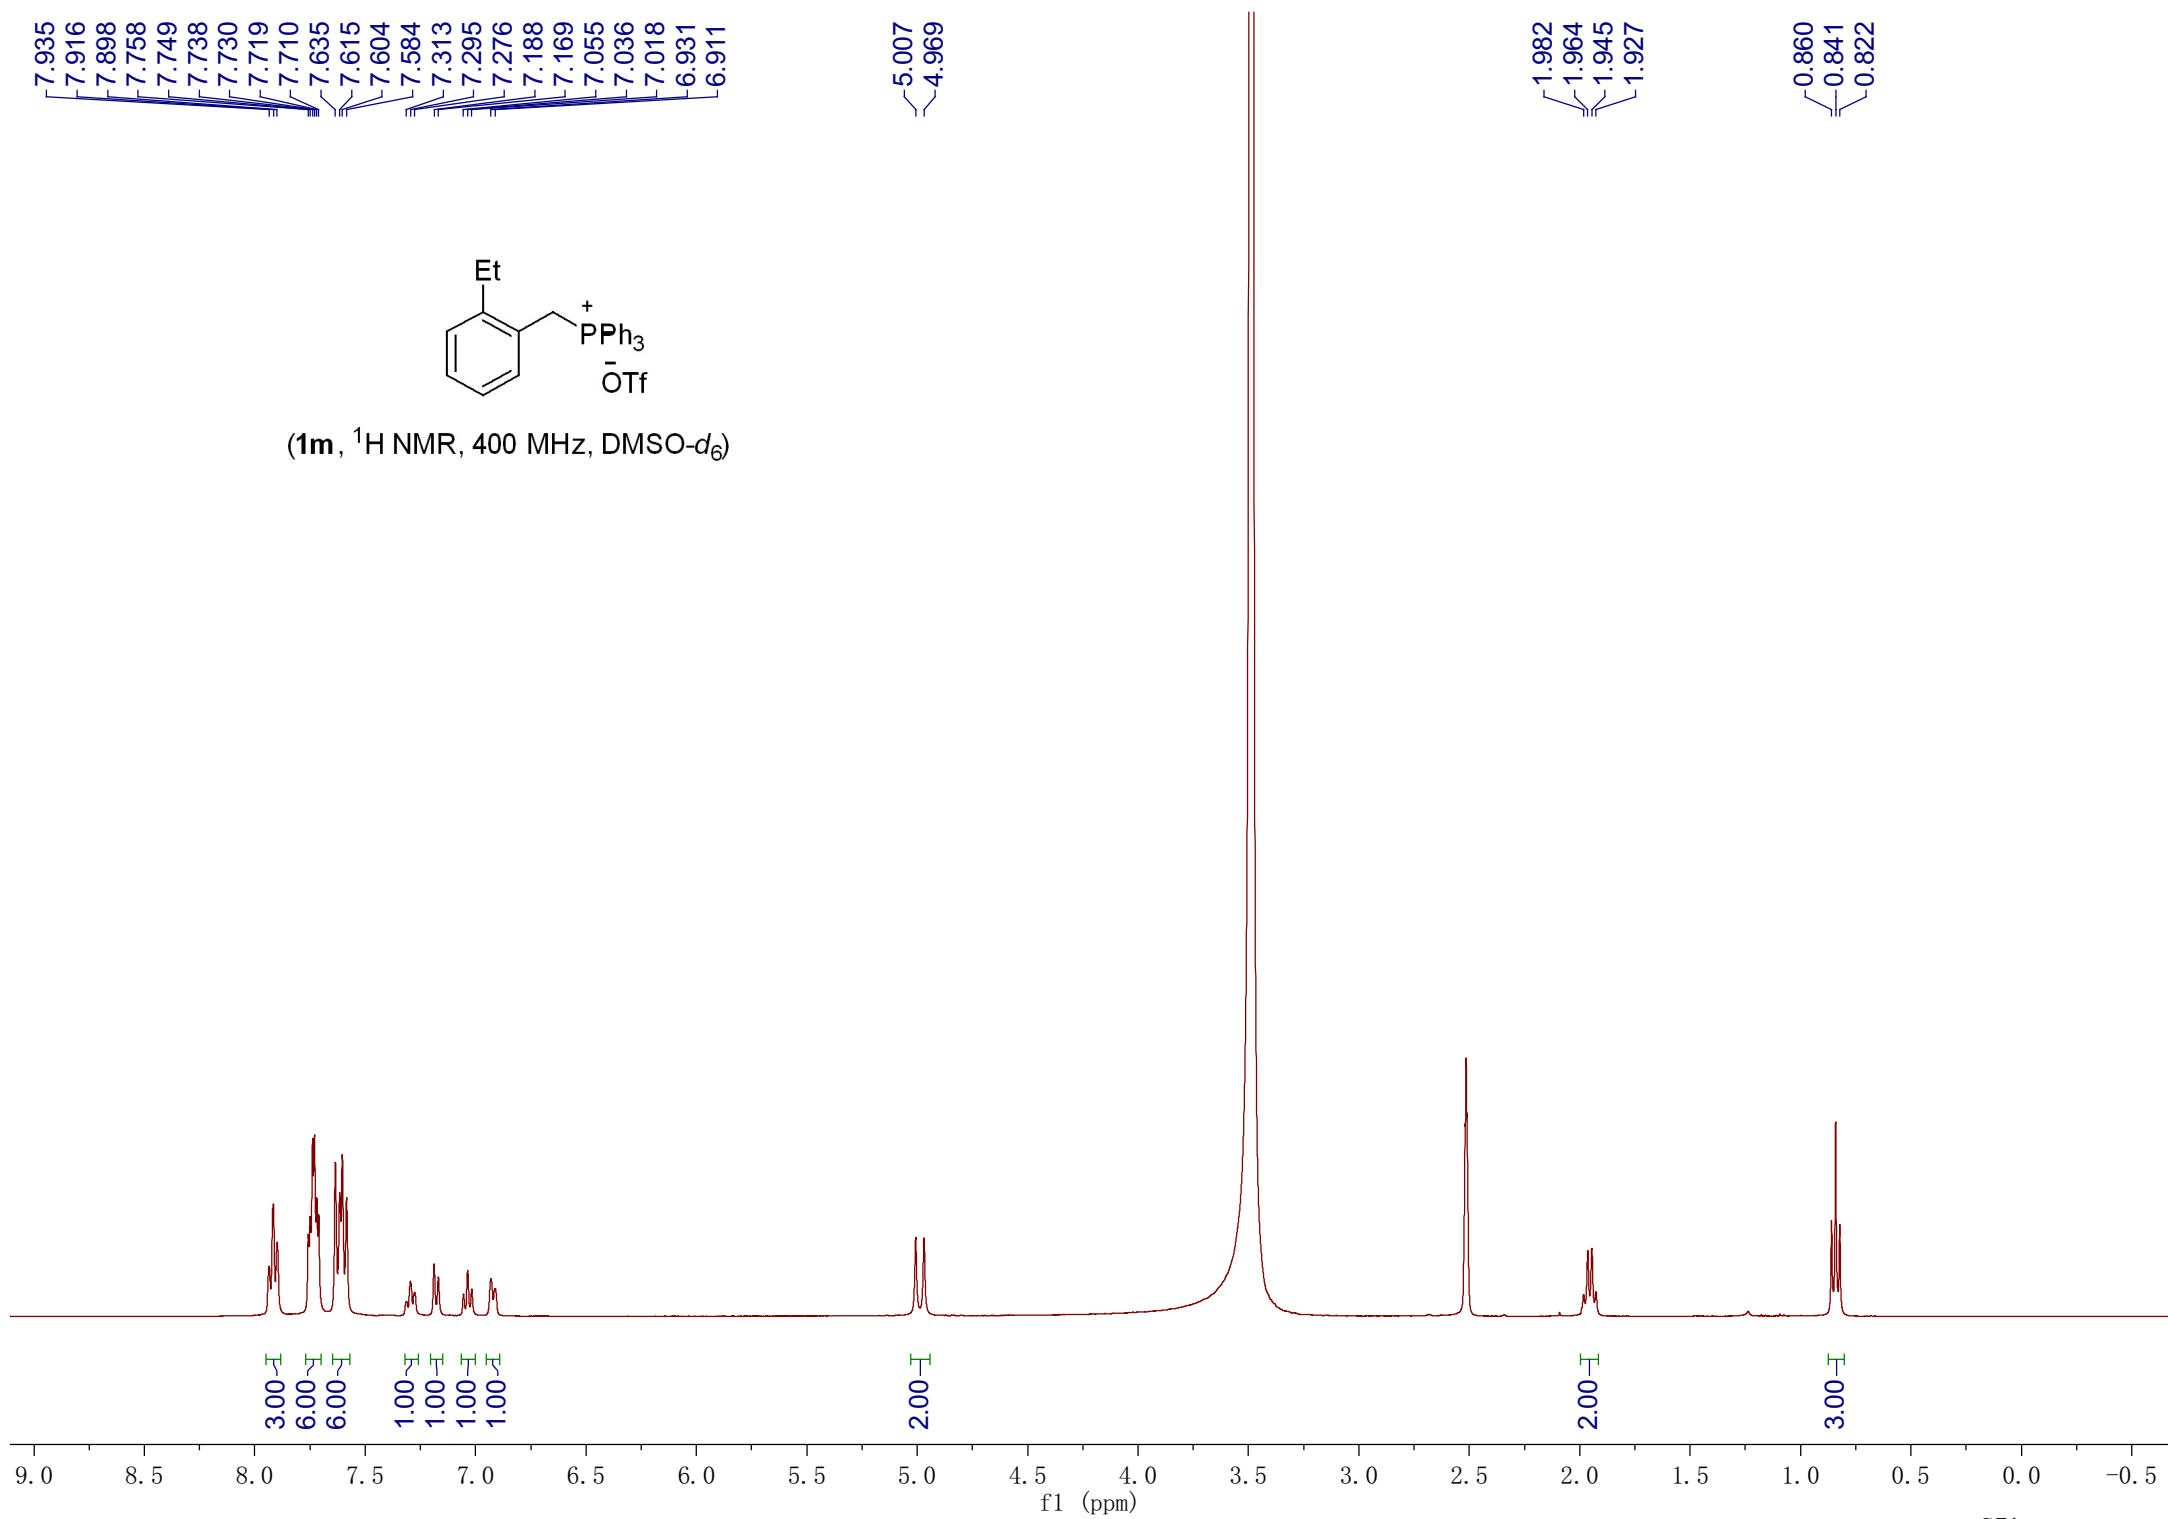

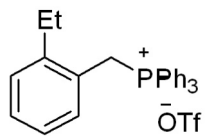

(**1m**, <sup>13</sup>C NMR, 100 MHz, DMSO-*d*<sub>6</sub>)

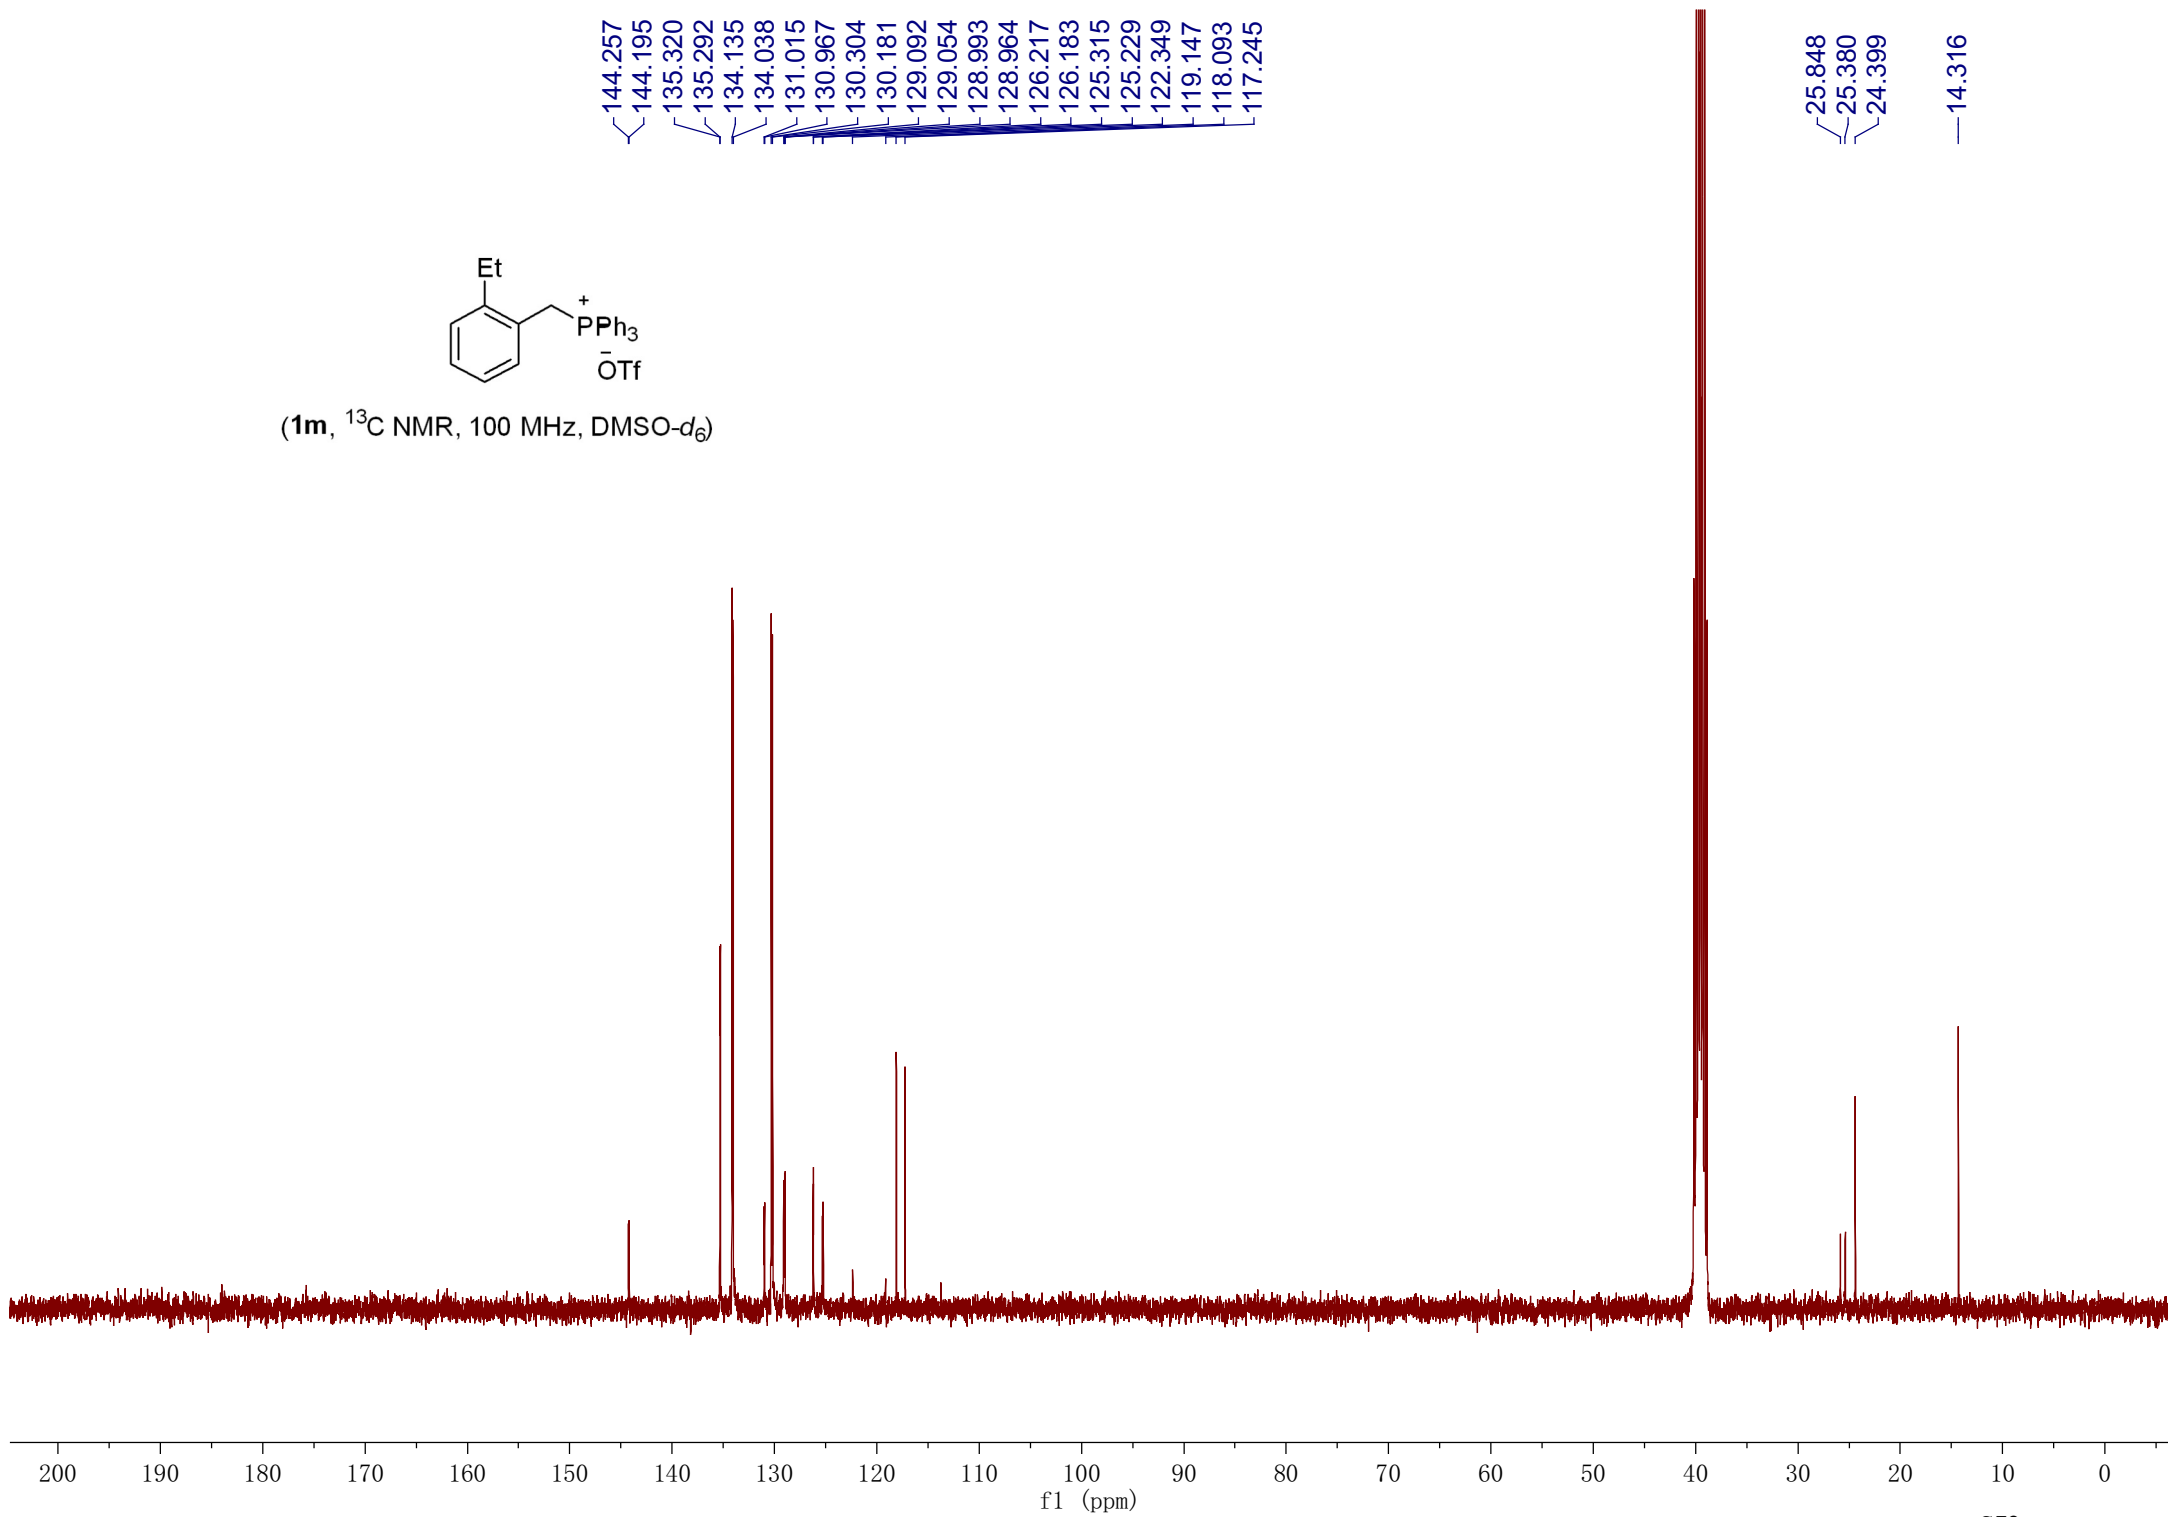



—22.503

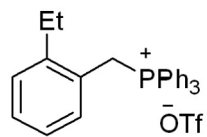

(**1m**,  $^{31}\text{P}$  NMR, 162 MHz,  $\text{DMSO-}d_6$ )

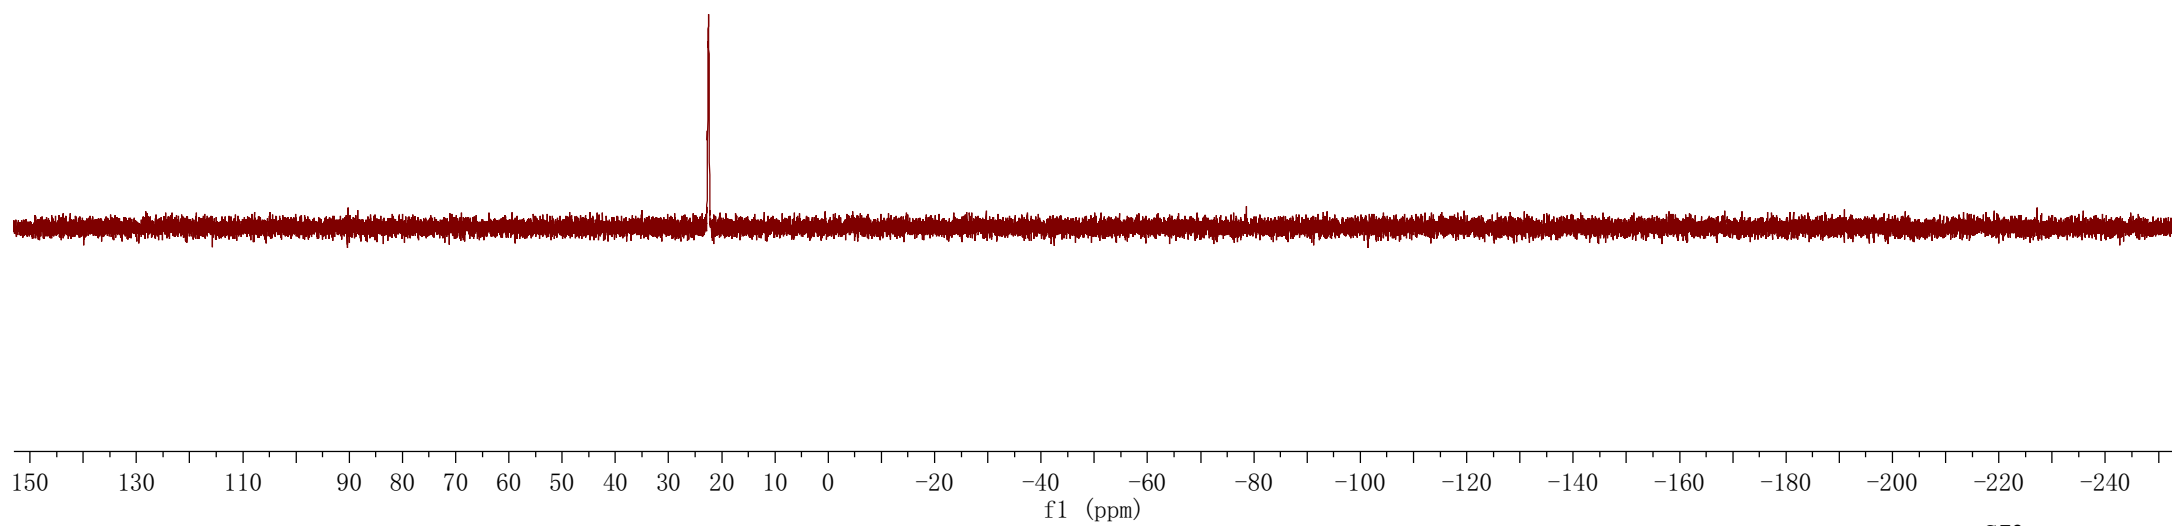

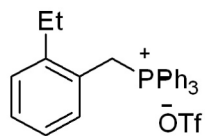

(1m,  $^{19}\text{F}$  NMR, 376 MHz, DMSO- $d_6$ )

— -77.755

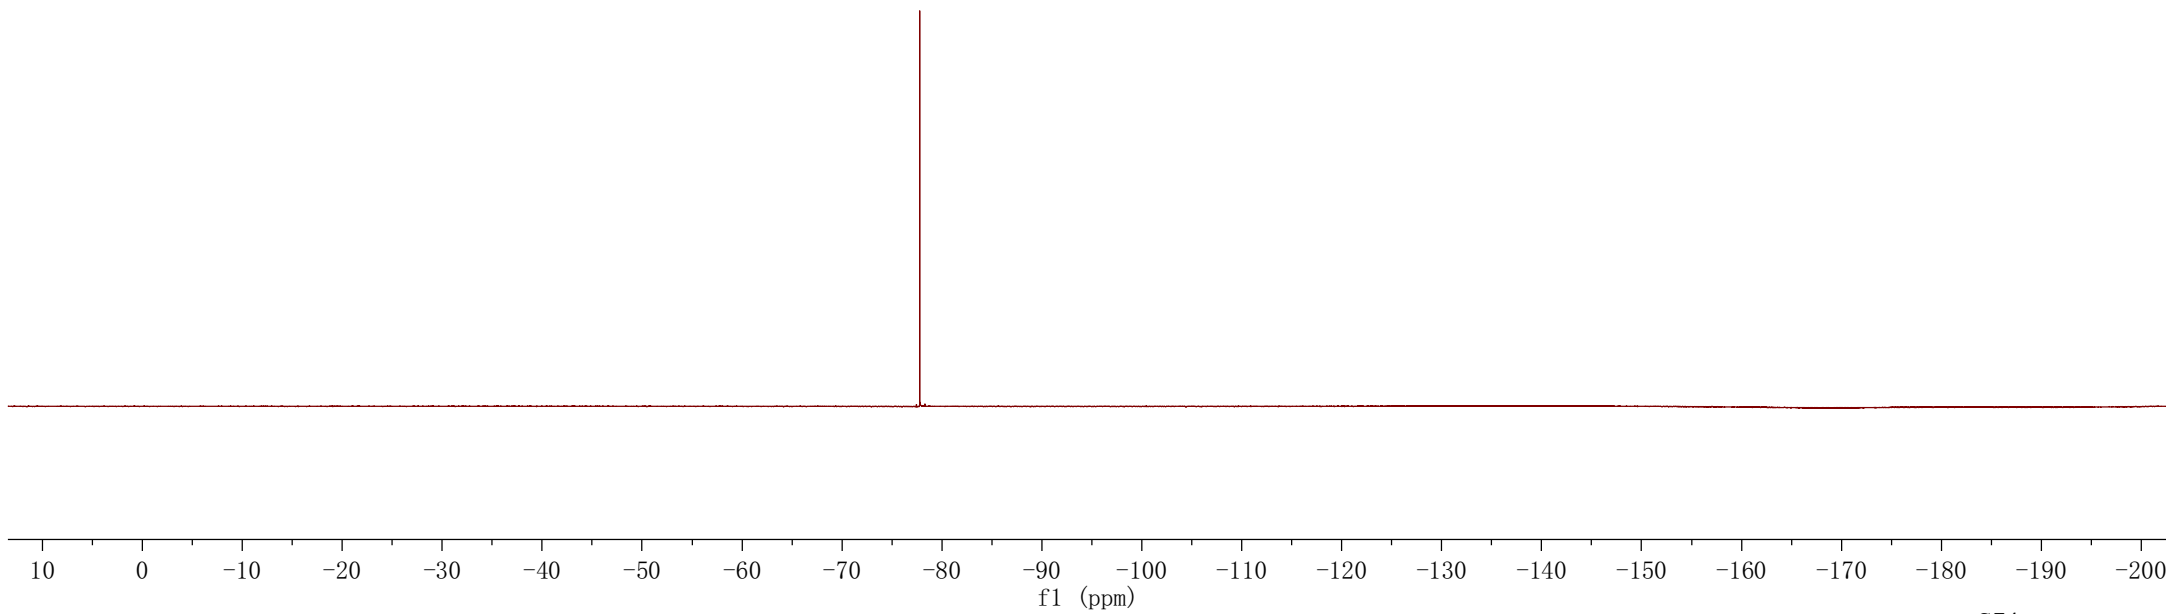

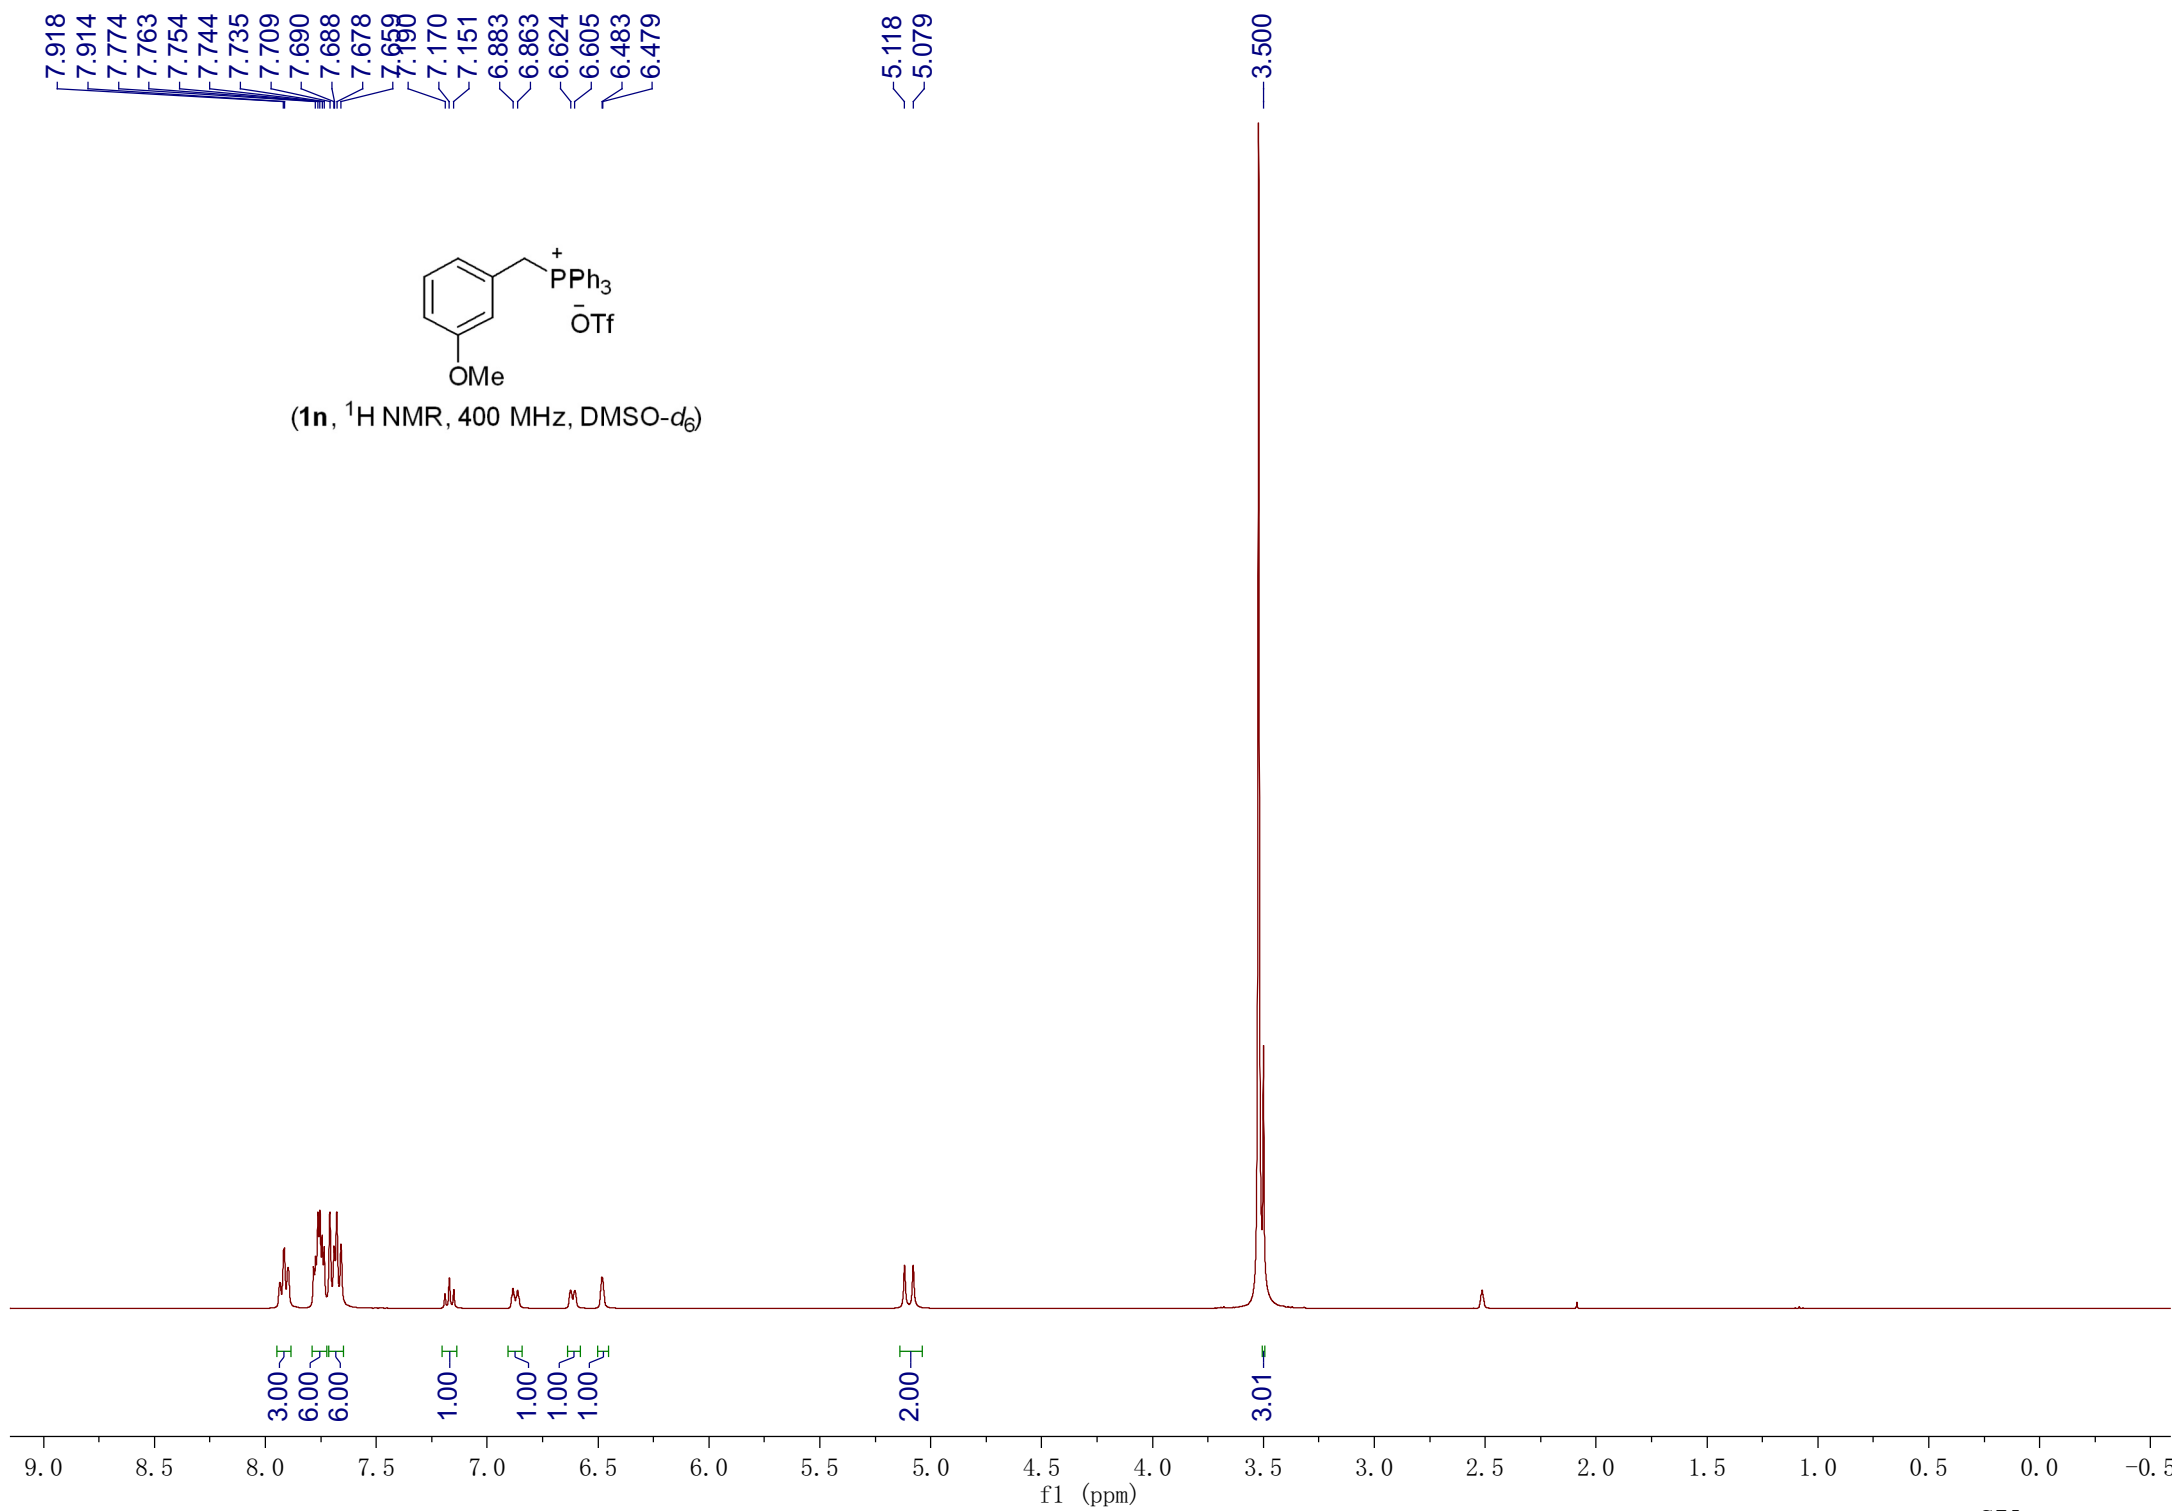

(1n, <sup>1</sup>H NMR, 400 MHz, DMSO-d<sub>6</sub>)

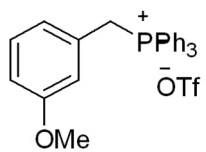

(1n, <sup>13</sup>C NMR, 100 MHz, DMSO-*d*<sub>6</sub>)

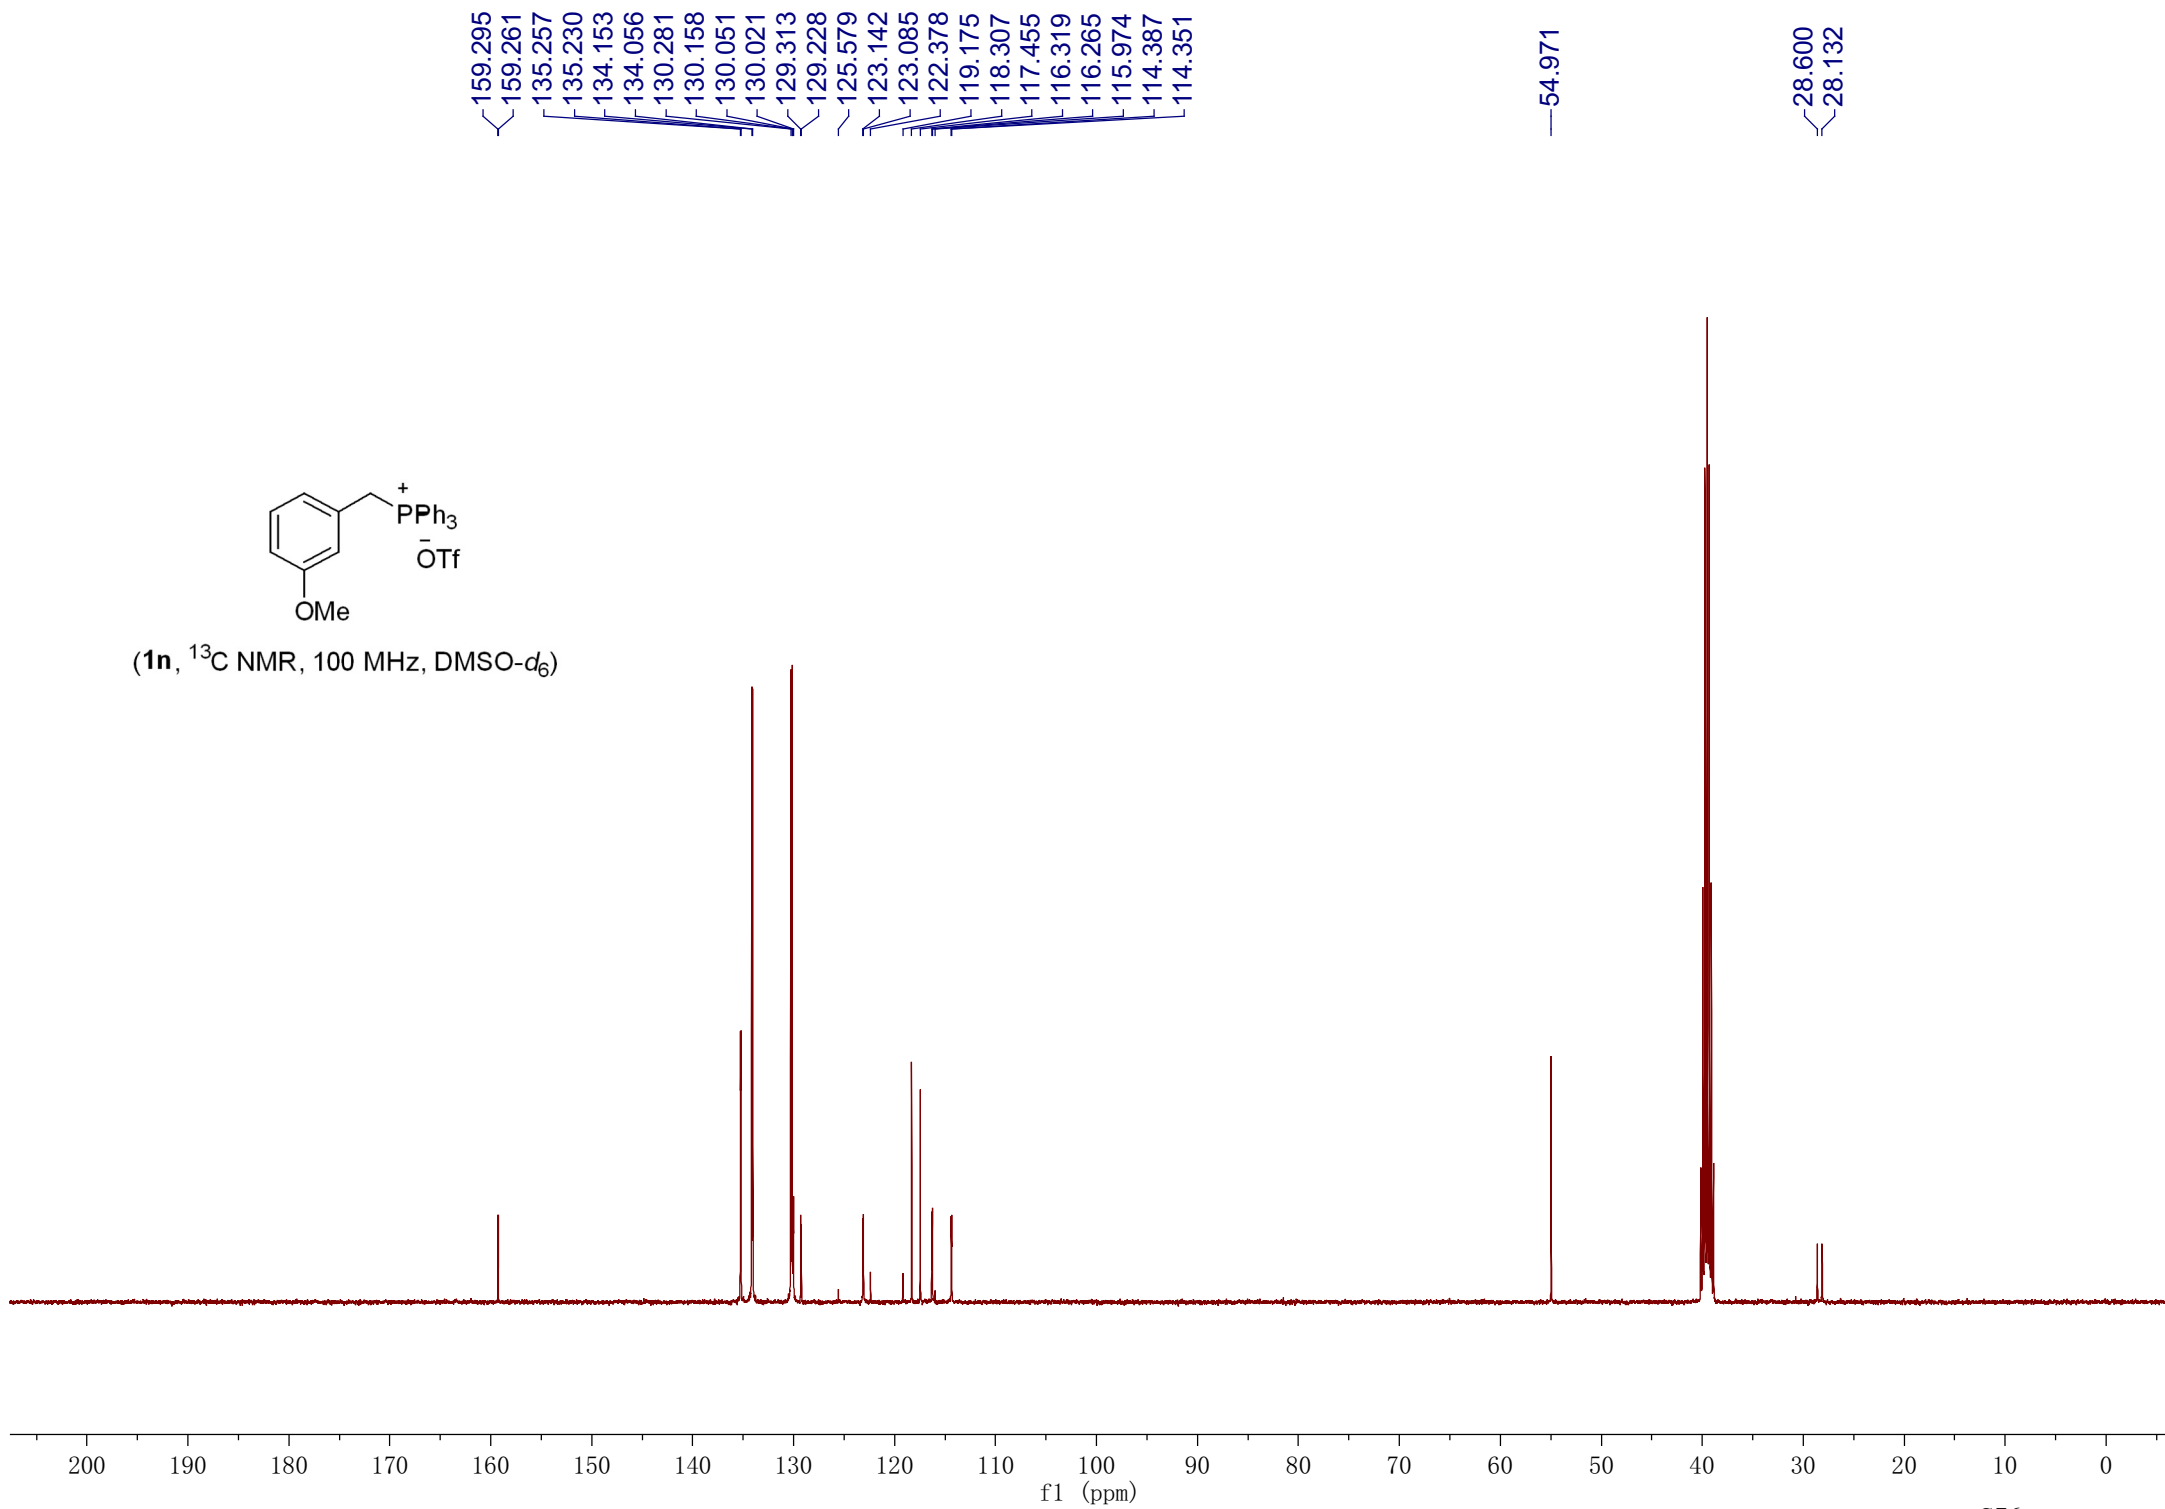

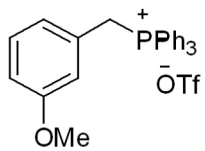

(**1n**,  $^{31}\text{P}$  NMR, 162 MHz, DMSO- $d_6$ )

—23.069

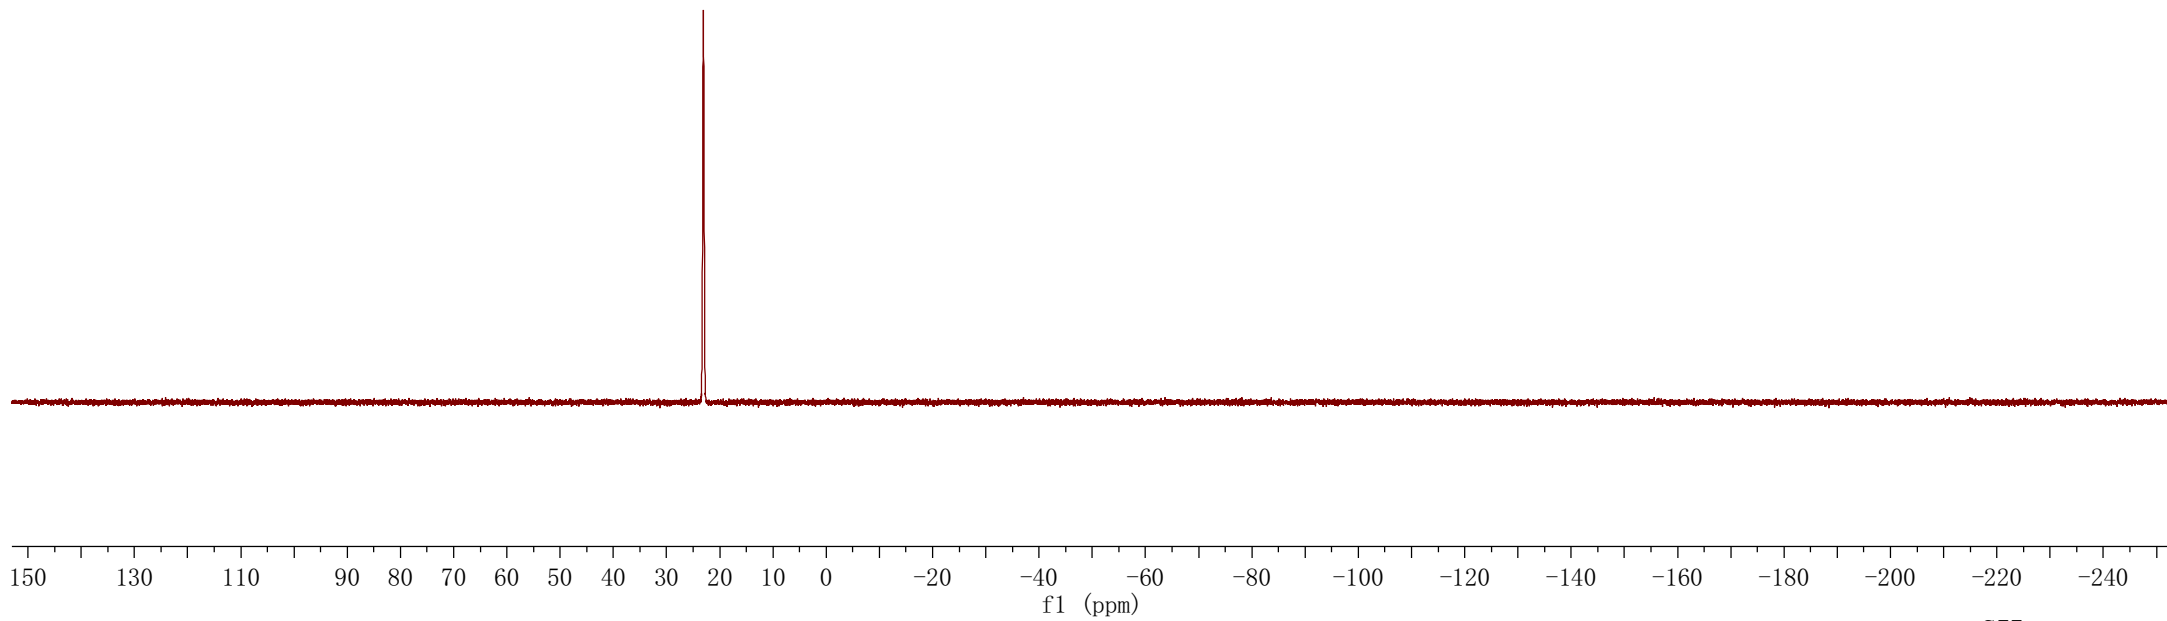

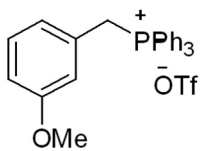

(**1n**, <sup>19</sup>F NMR, 376 MHz, DMSO-*d*<sub>6</sub>)

---77.729

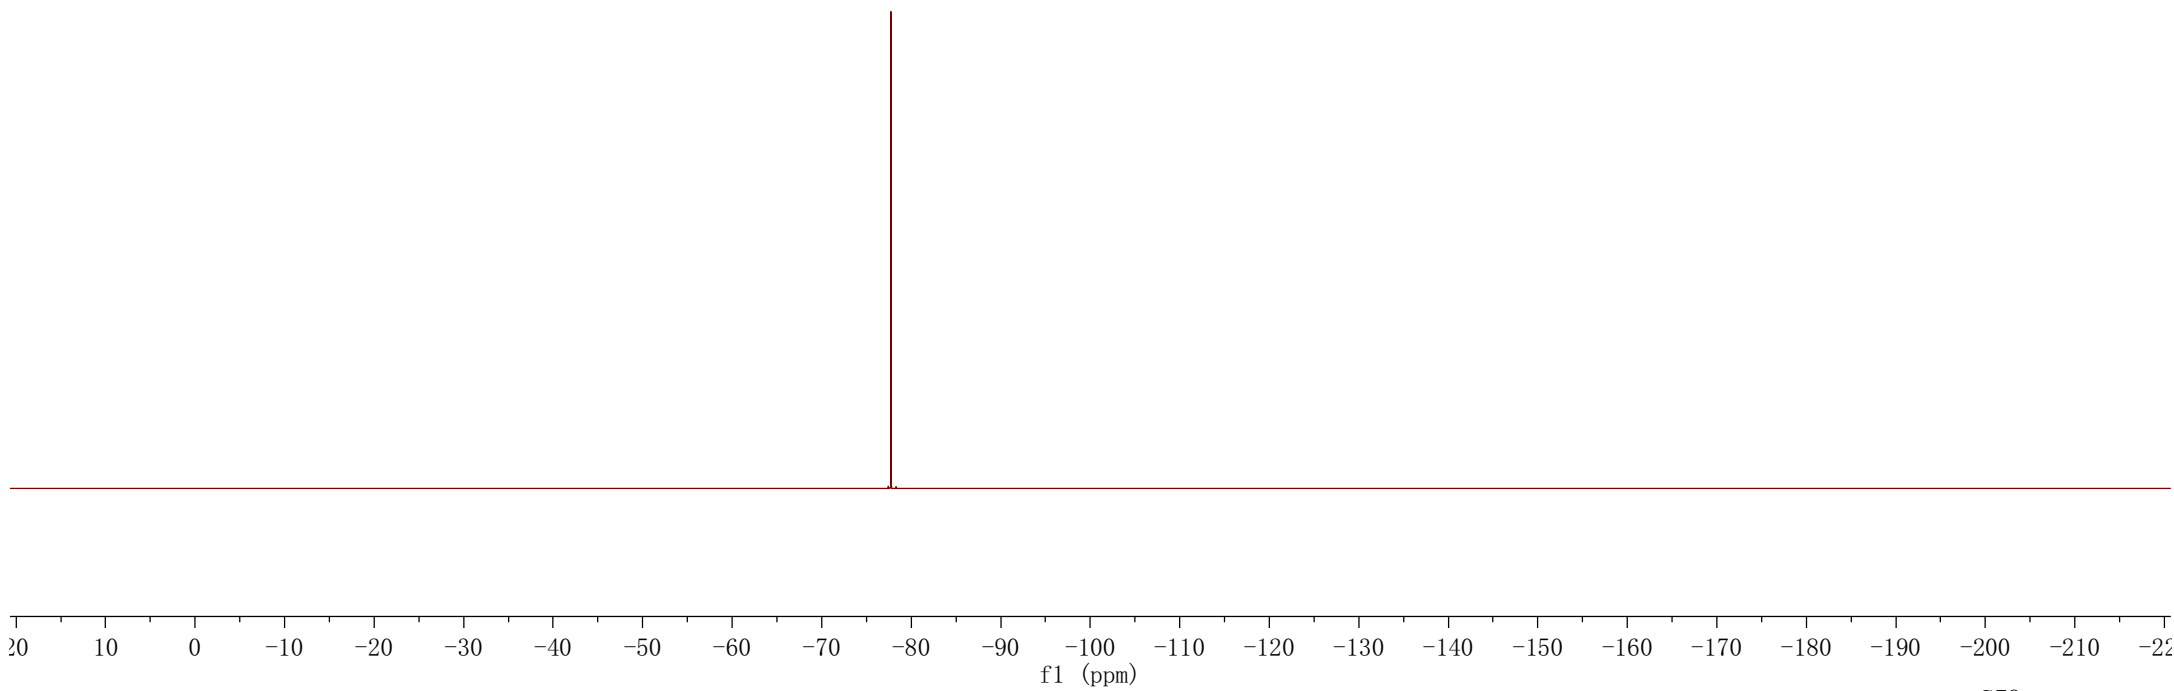

7.921  
7.918  
7.763  
7.752  
7.744  
7.734  
7.724  
7.702  
7.683  
7.671  
7.652  
7.362  
7.343  
7.323  
7.294  
7.274  
7.254  
7.167  
7.149  
7.007  
6.987  
6.827  
6.807  
6.790  
6.771  
6.580  
5.218  
5.178

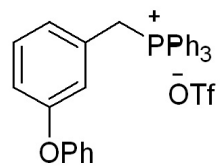

(**1o**, <sup>1</sup>H NMR, 400 MHz, DMSO-*d*<sub>6</sub>)

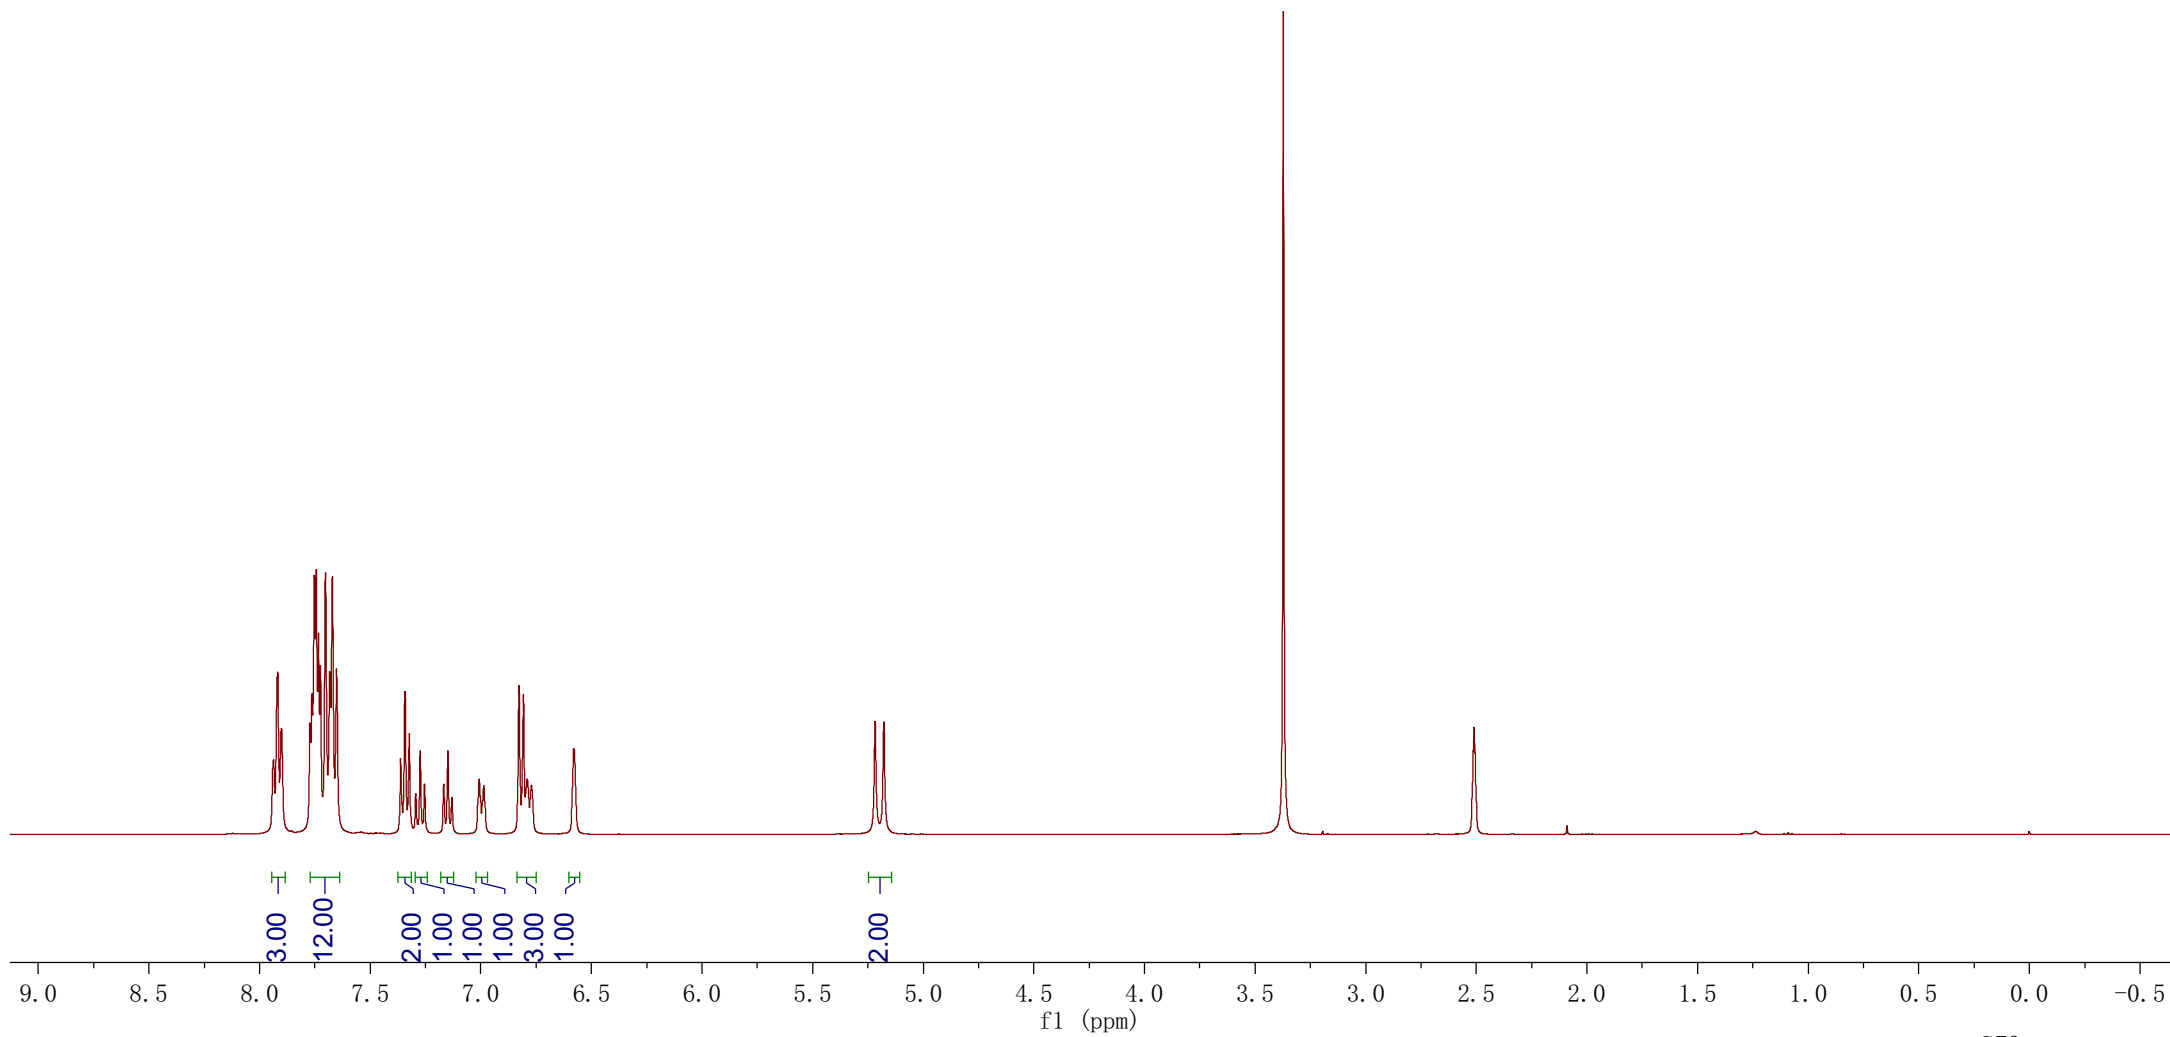

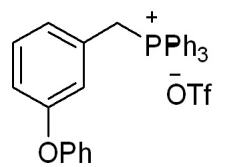

(**1o**, <sup>13</sup>C NMR, 100 MHz, DMSO-d<sub>6</sub>)

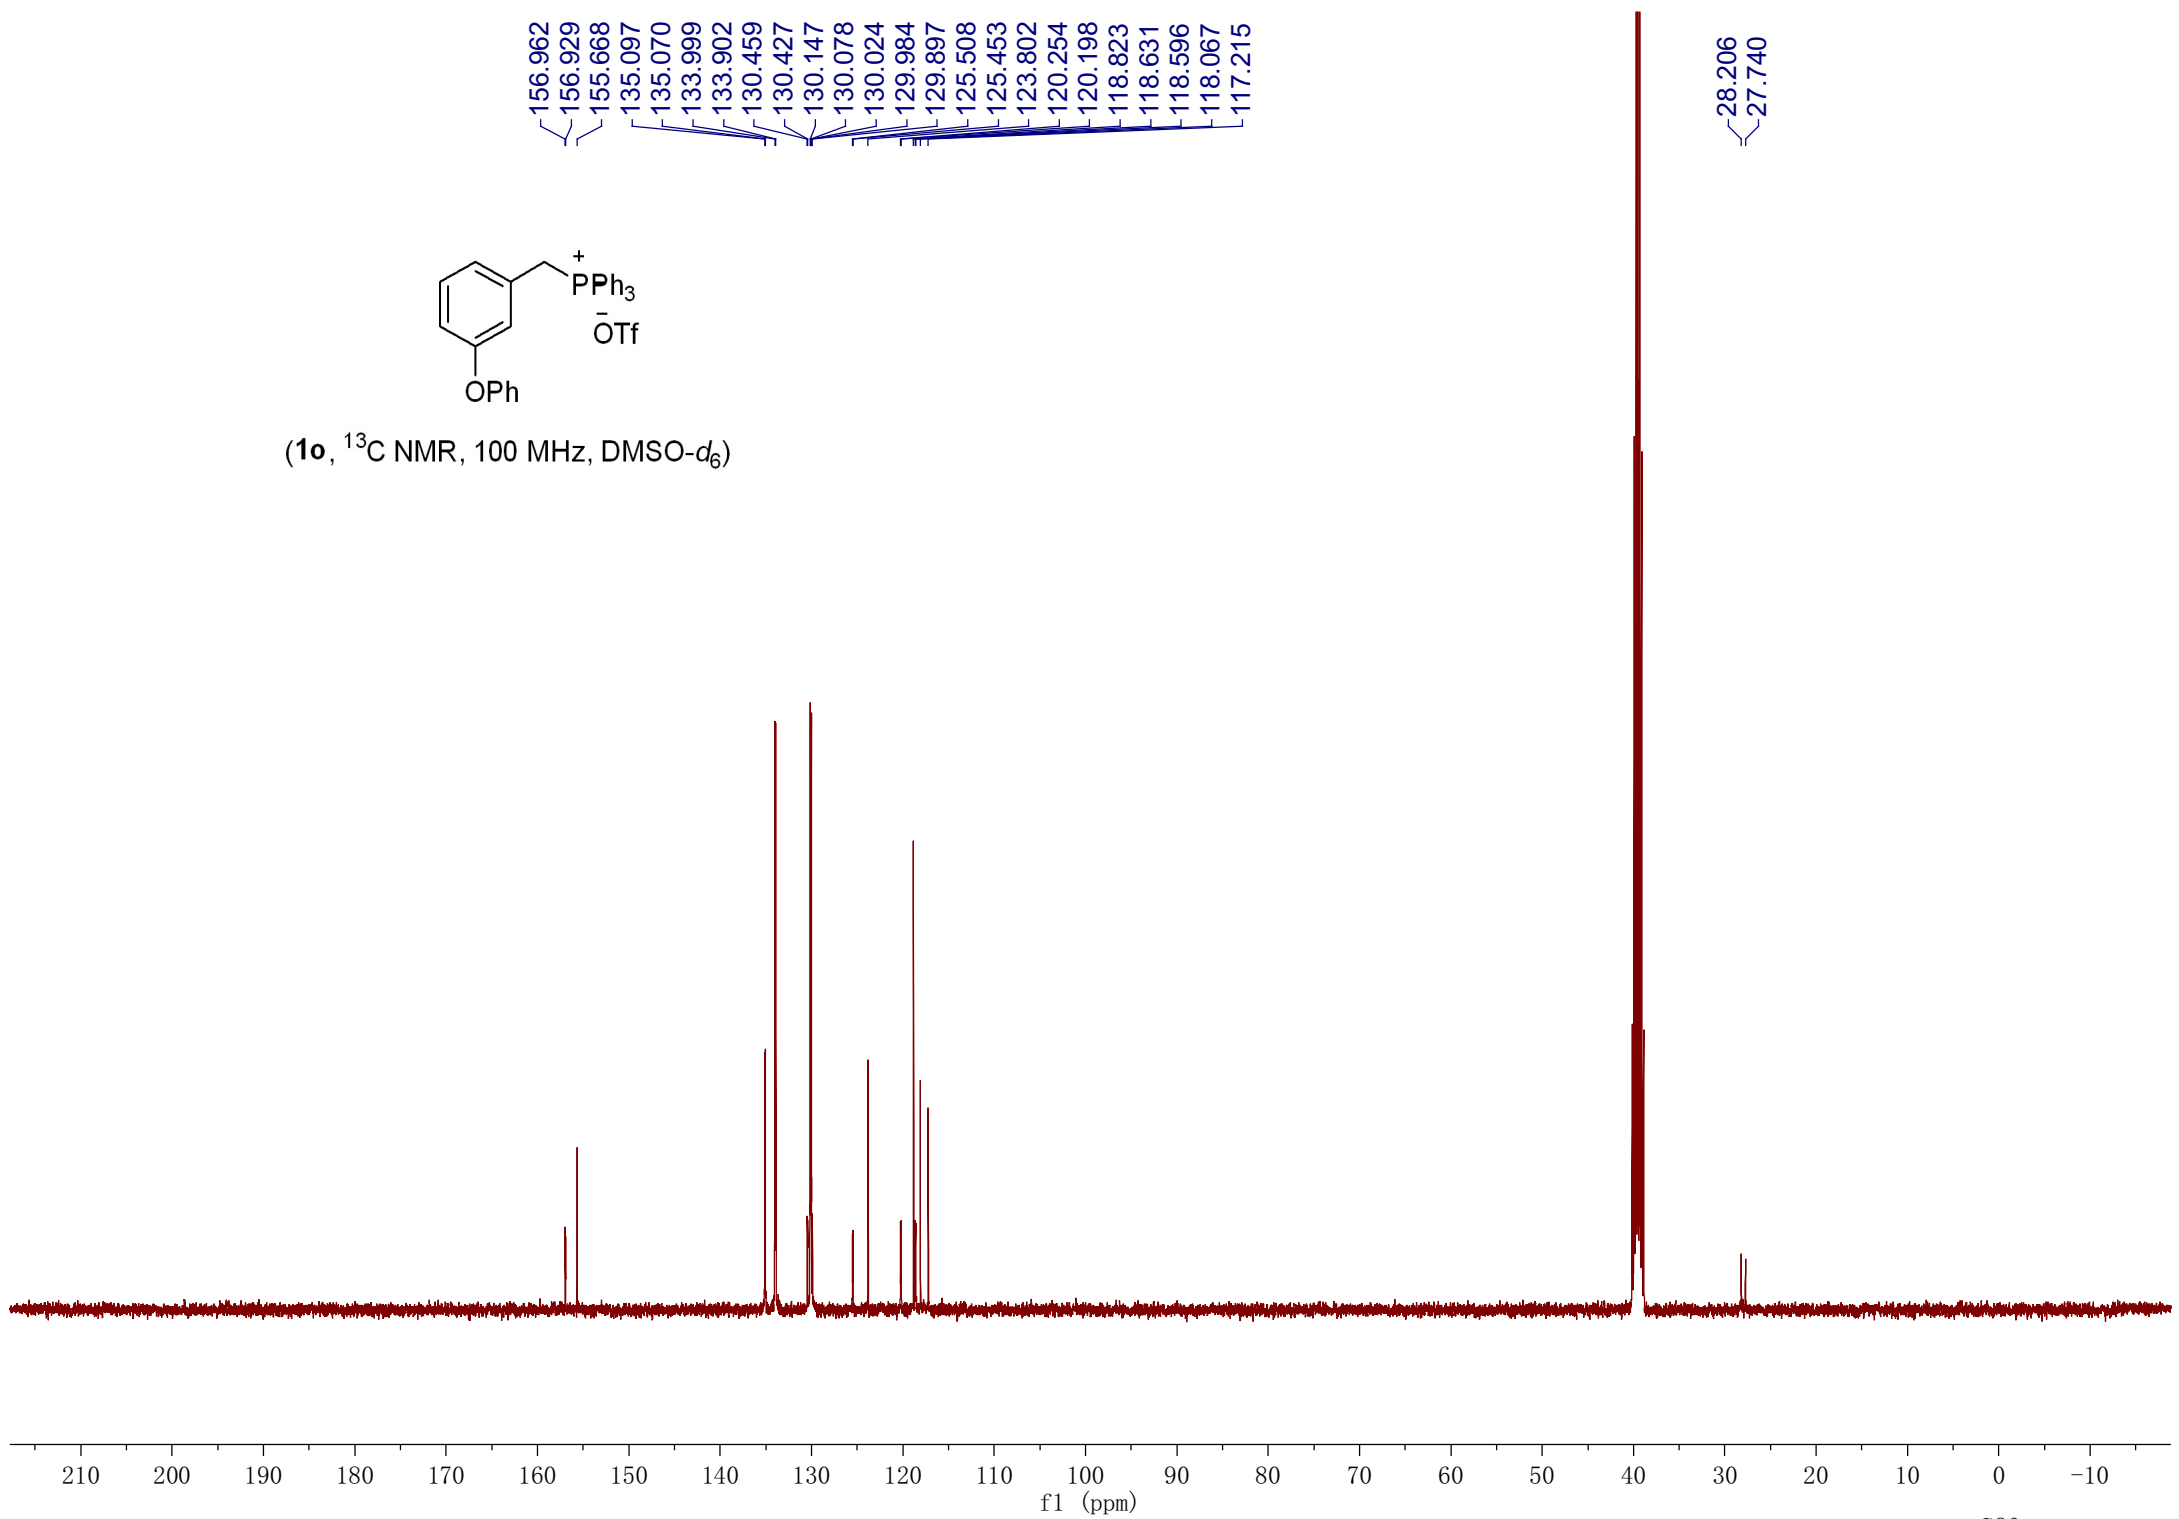



—23.302

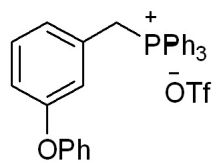

(**10**, <sup>31</sup>P NMR, 162 MHz, DMSO-*d*<sub>6</sub>)

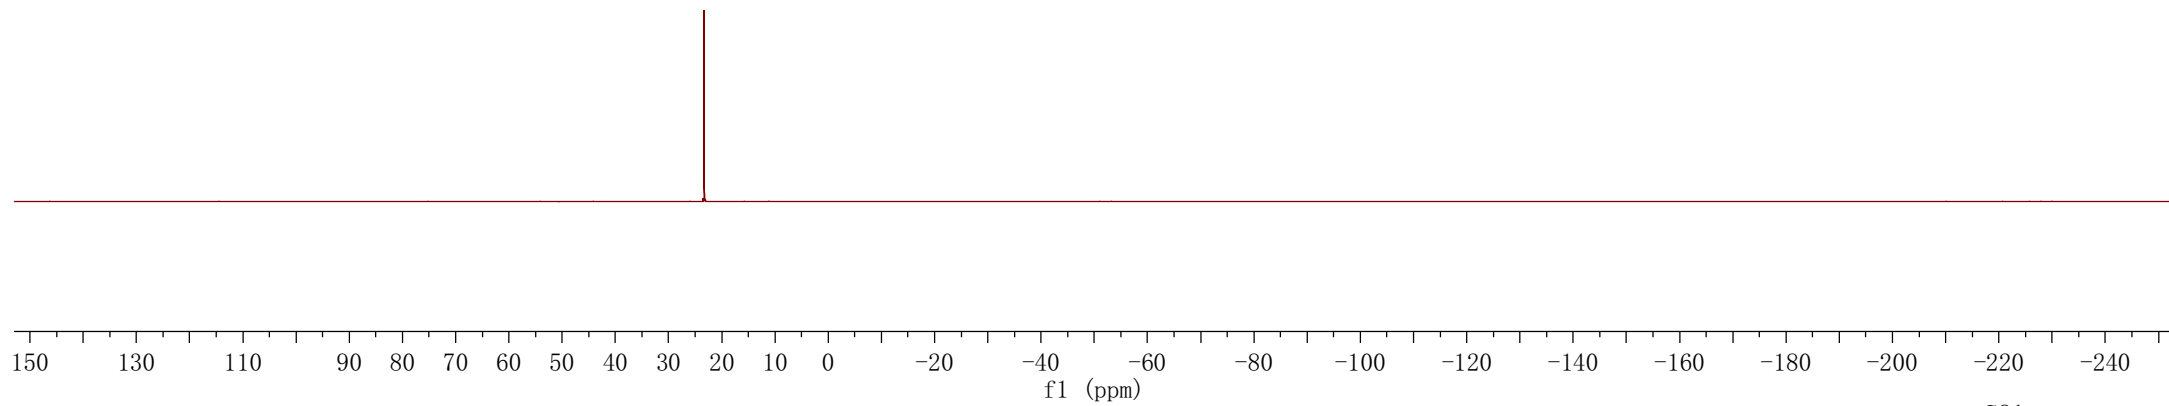

-77.717

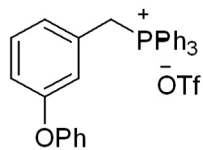

(1o, <sup>19</sup>F NMR, 376 MHz, DMSO-d<sub>6</sub>)

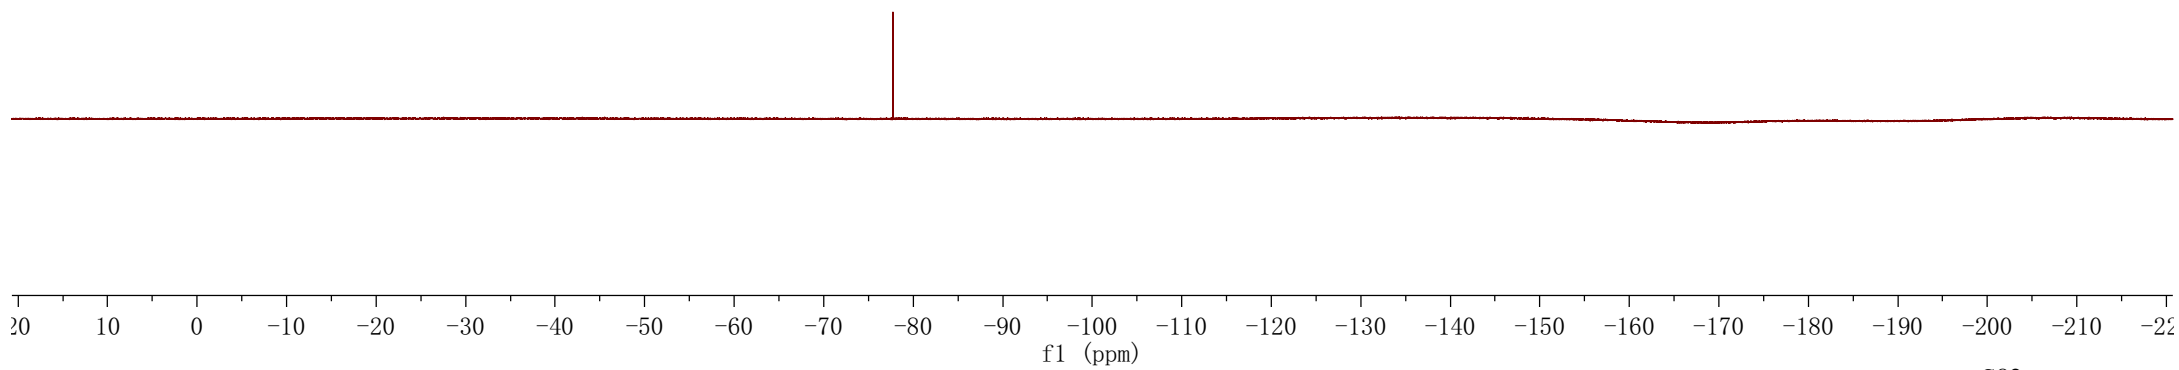

7.938  
7.919  
7.902  
7.779  
7.770  
7.759  
7.751  
7.741  
7.732  
7.709  
7.689  
7.678  
7.658  
7.424  
7.404  
7.384  
7.324  
7.303  
7.072  
7.053  
6.939

5.295  
5.256

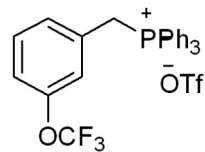

(**1p**, <sup>1</sup>H NMR, 400 MHz, DMSO-*d*<sub>6</sub>)

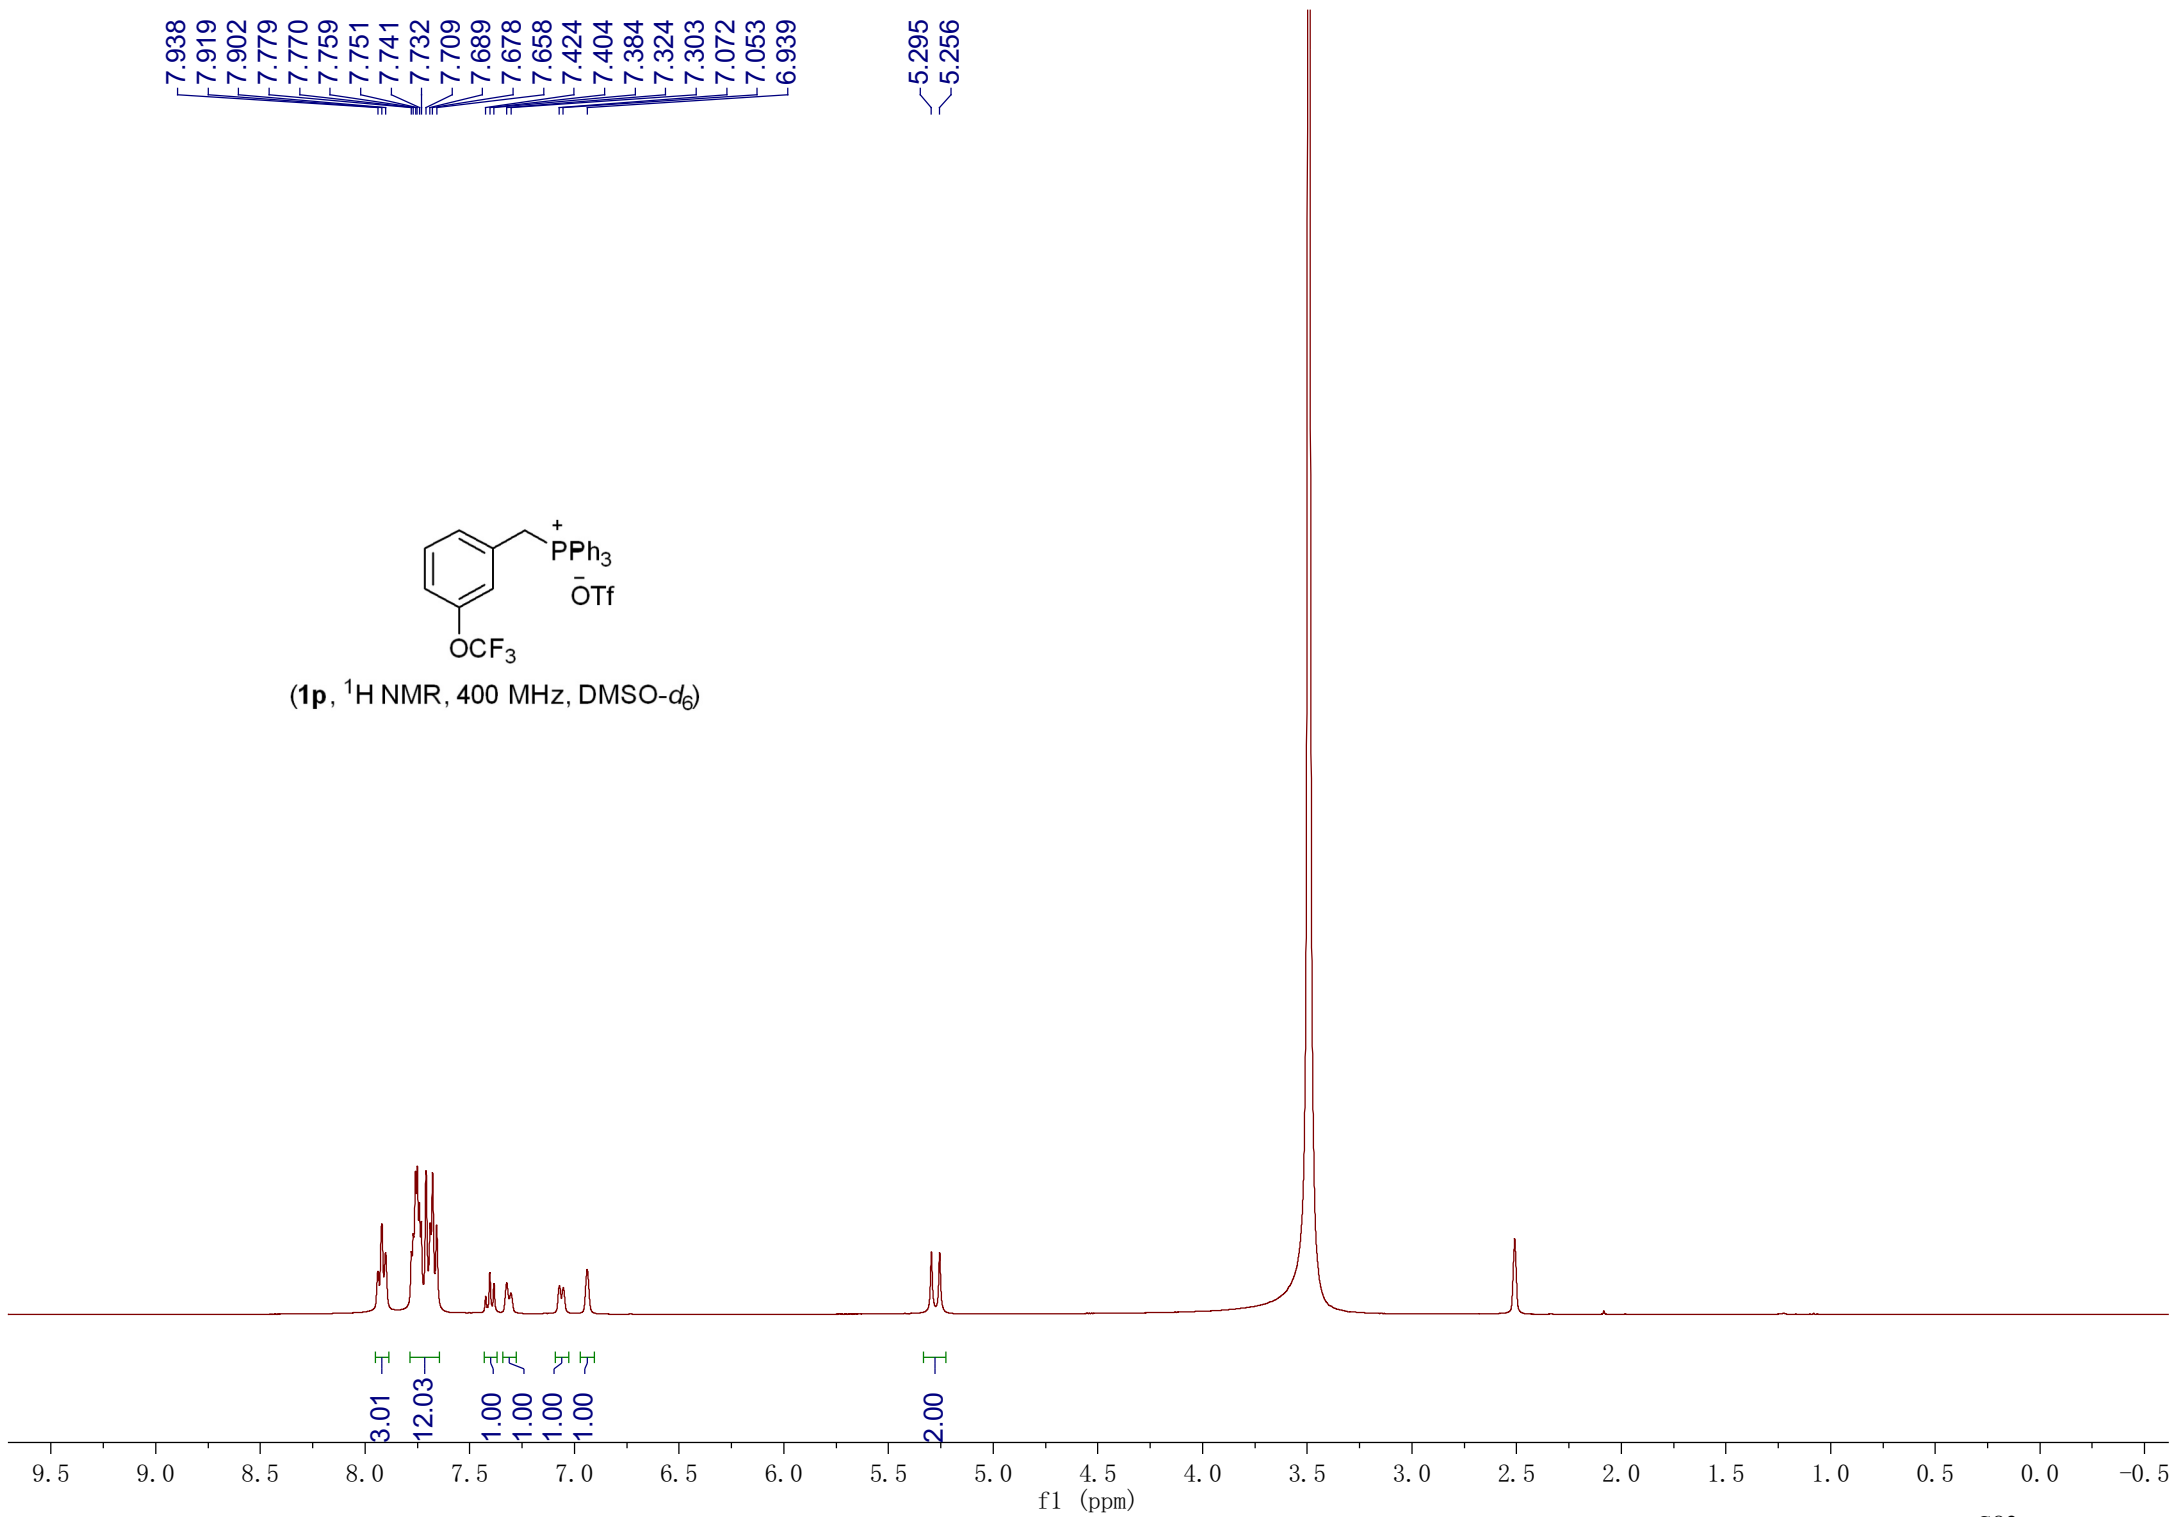

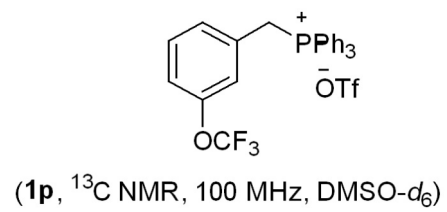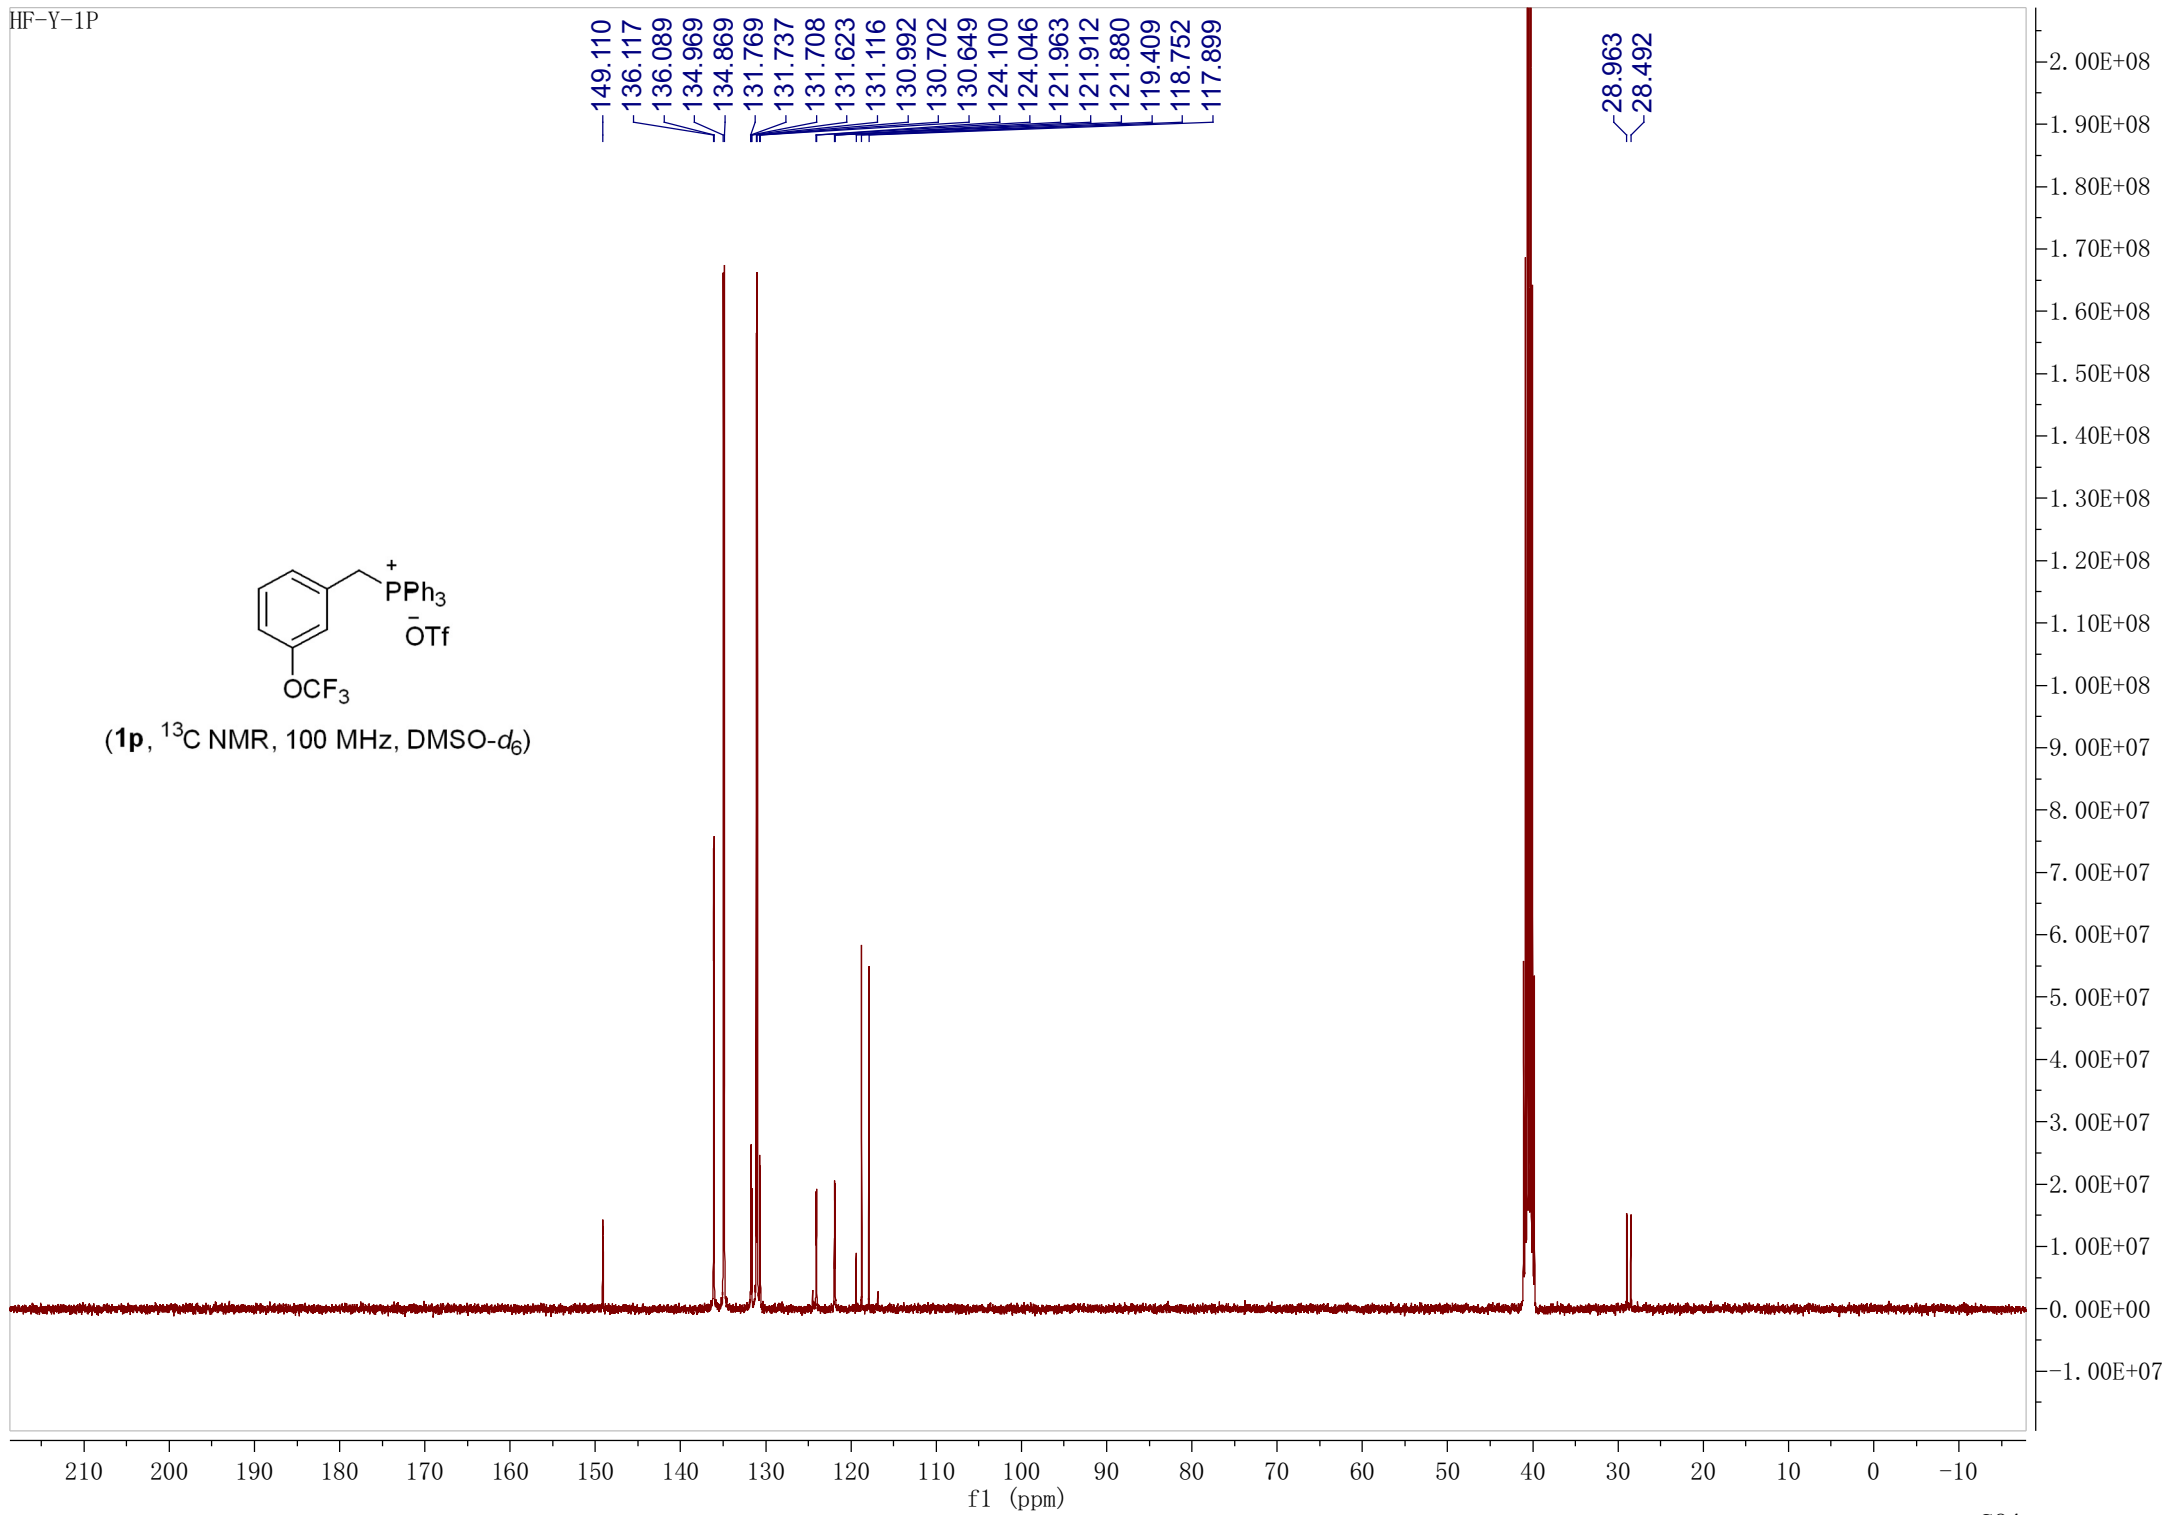

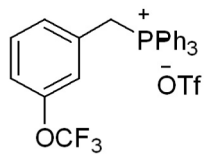

(**1p**, <sup>31</sup>P NMR, 162 MHz, DMSO-*d*<sub>6</sub>)

—23.500

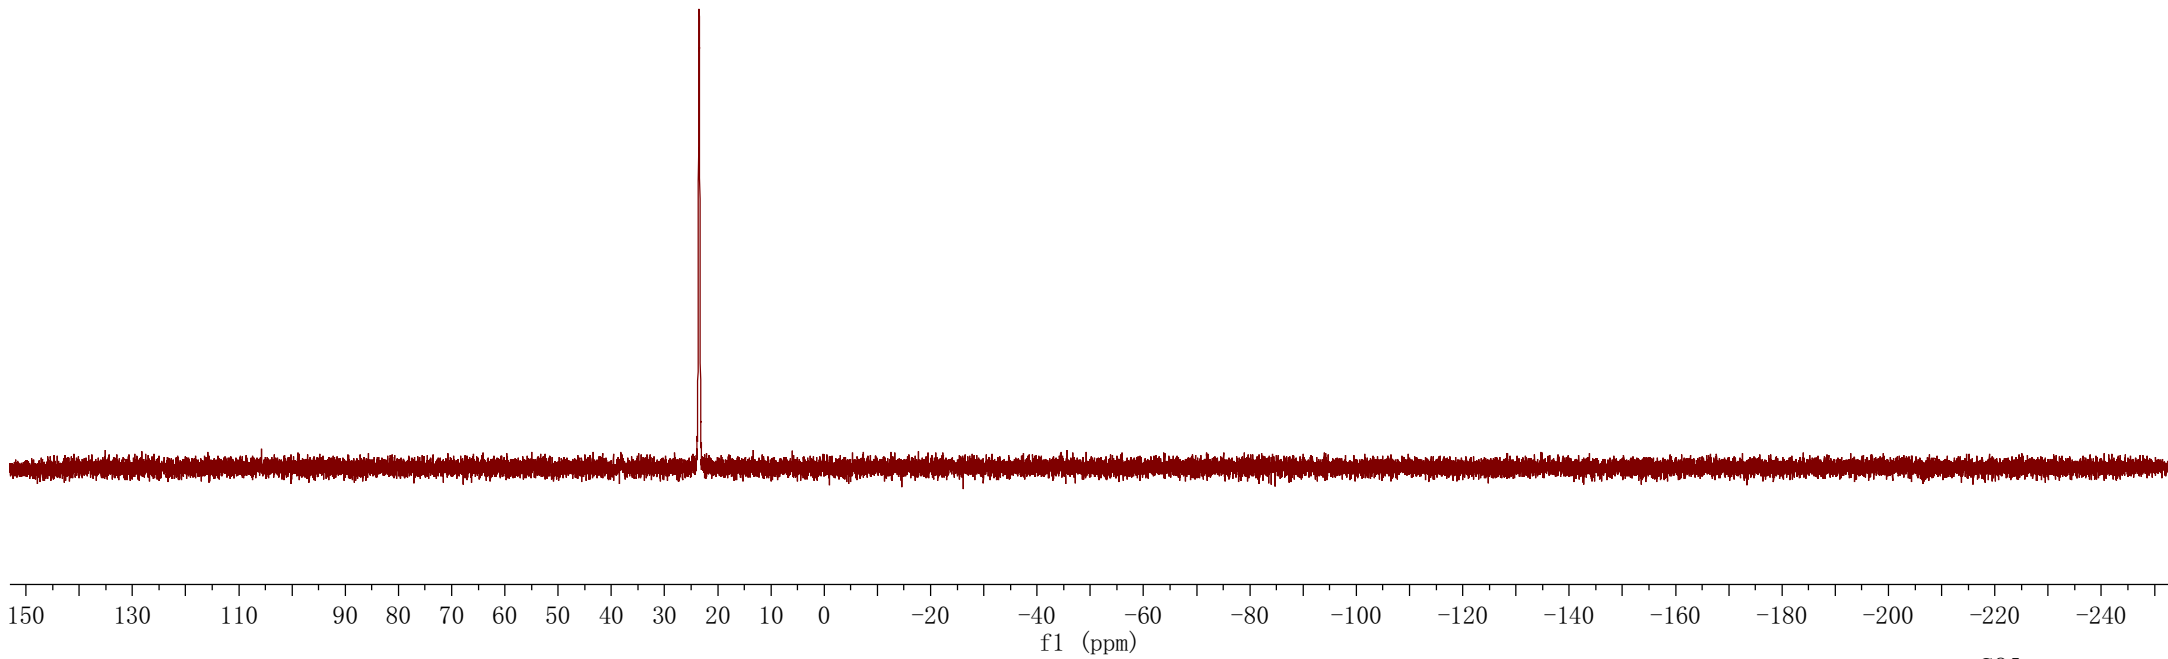

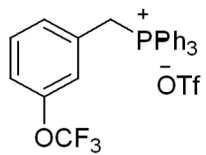

(**1p**,  $^{19}\text{F}$  NMR, 376 MHz,  $\text{DMSO-}d_6$ )

—56.847

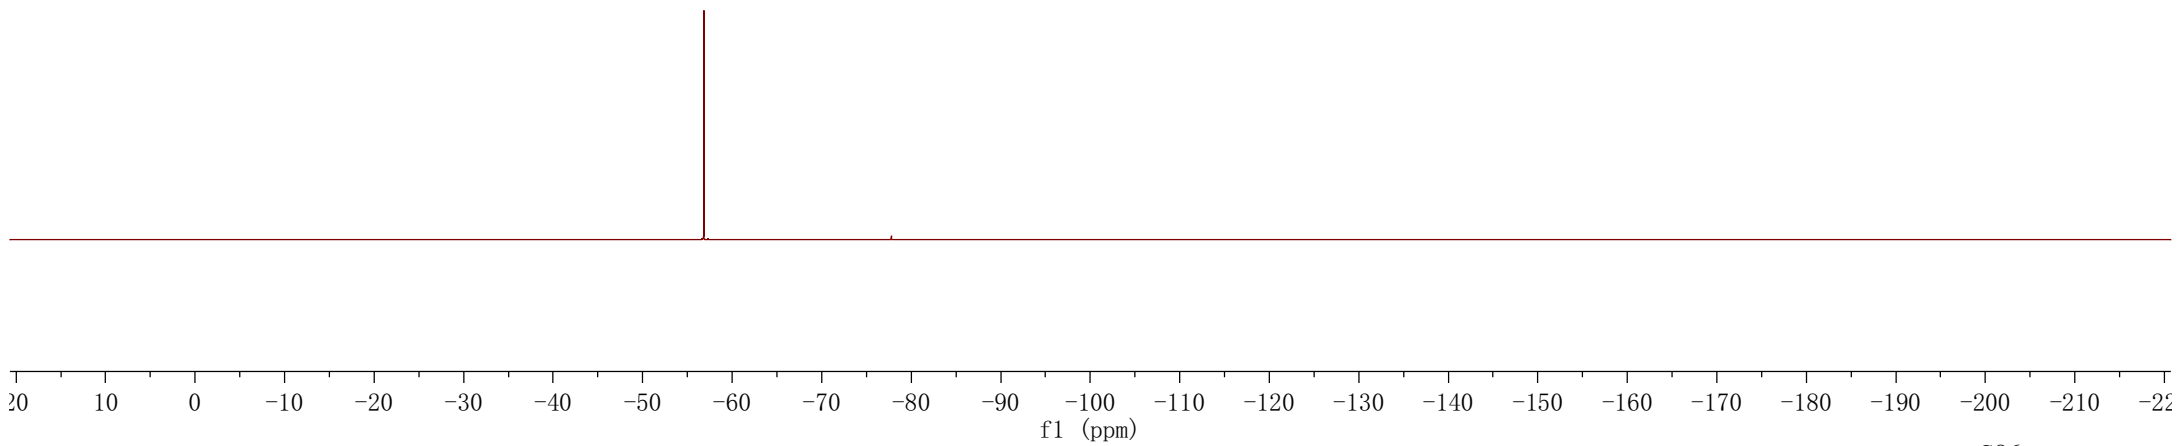

7.916  
7.913  
7.896  
7.778  
7.769  
7.758  
7.749  
7.739  
7.730  
7.690  
7.671  
7.659  
7.640  
7.630  
7.121  
6.823  
6.807  
6.650

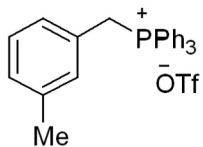

(1q, <sup>1</sup>H NMR, 400 MHz, DMSO-d<sub>6</sub>)

5.097  
5.058

2.090

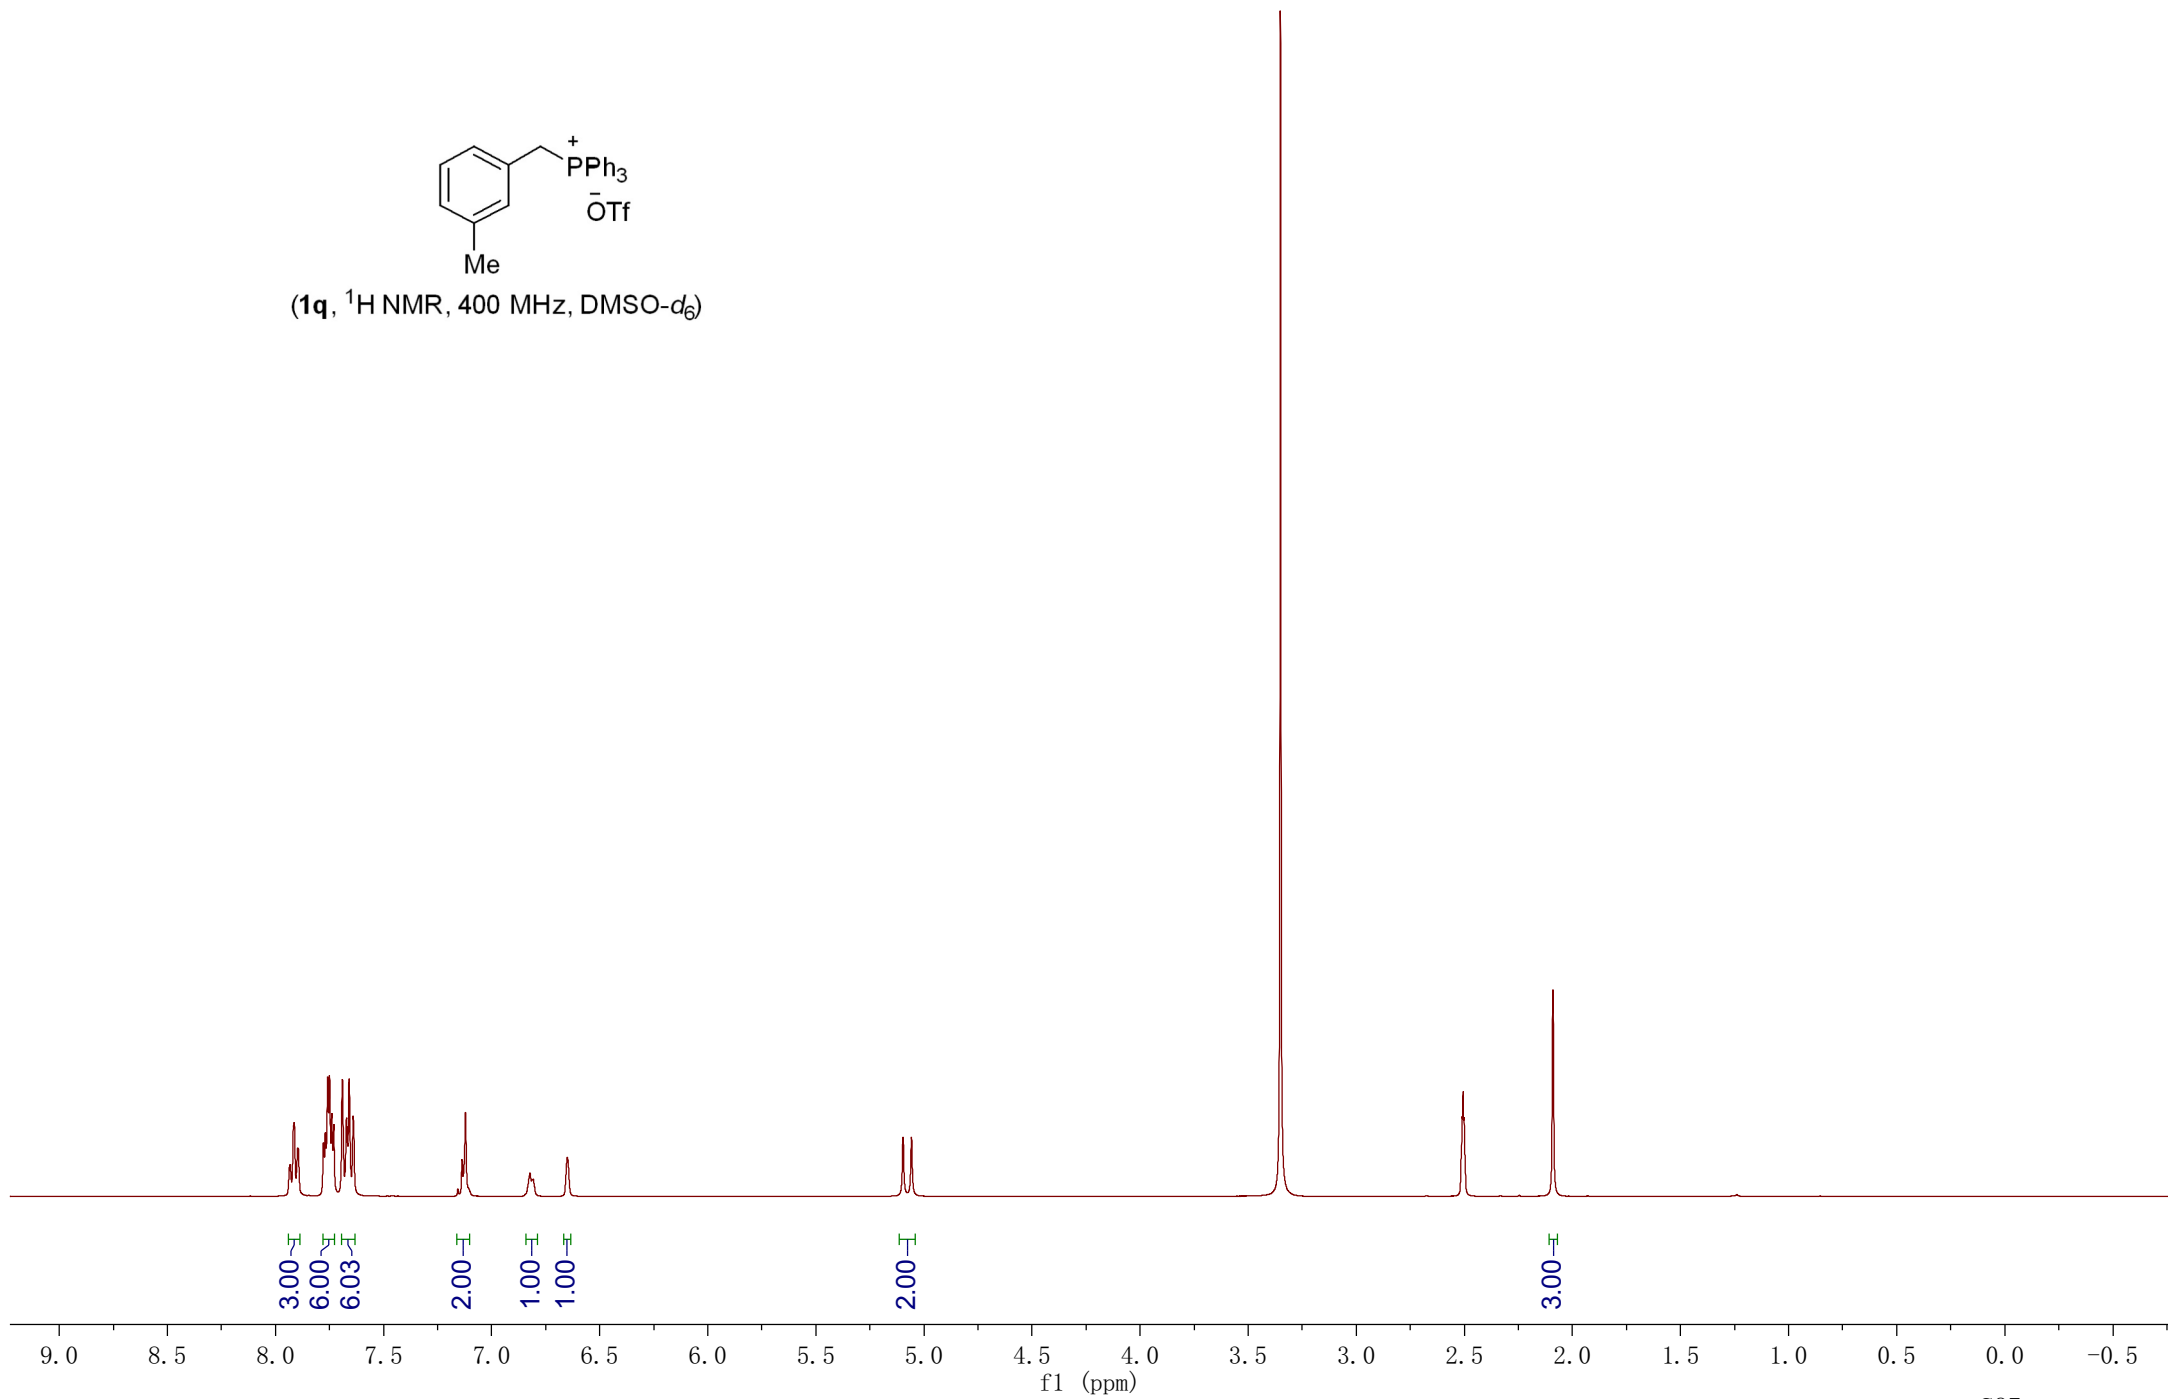

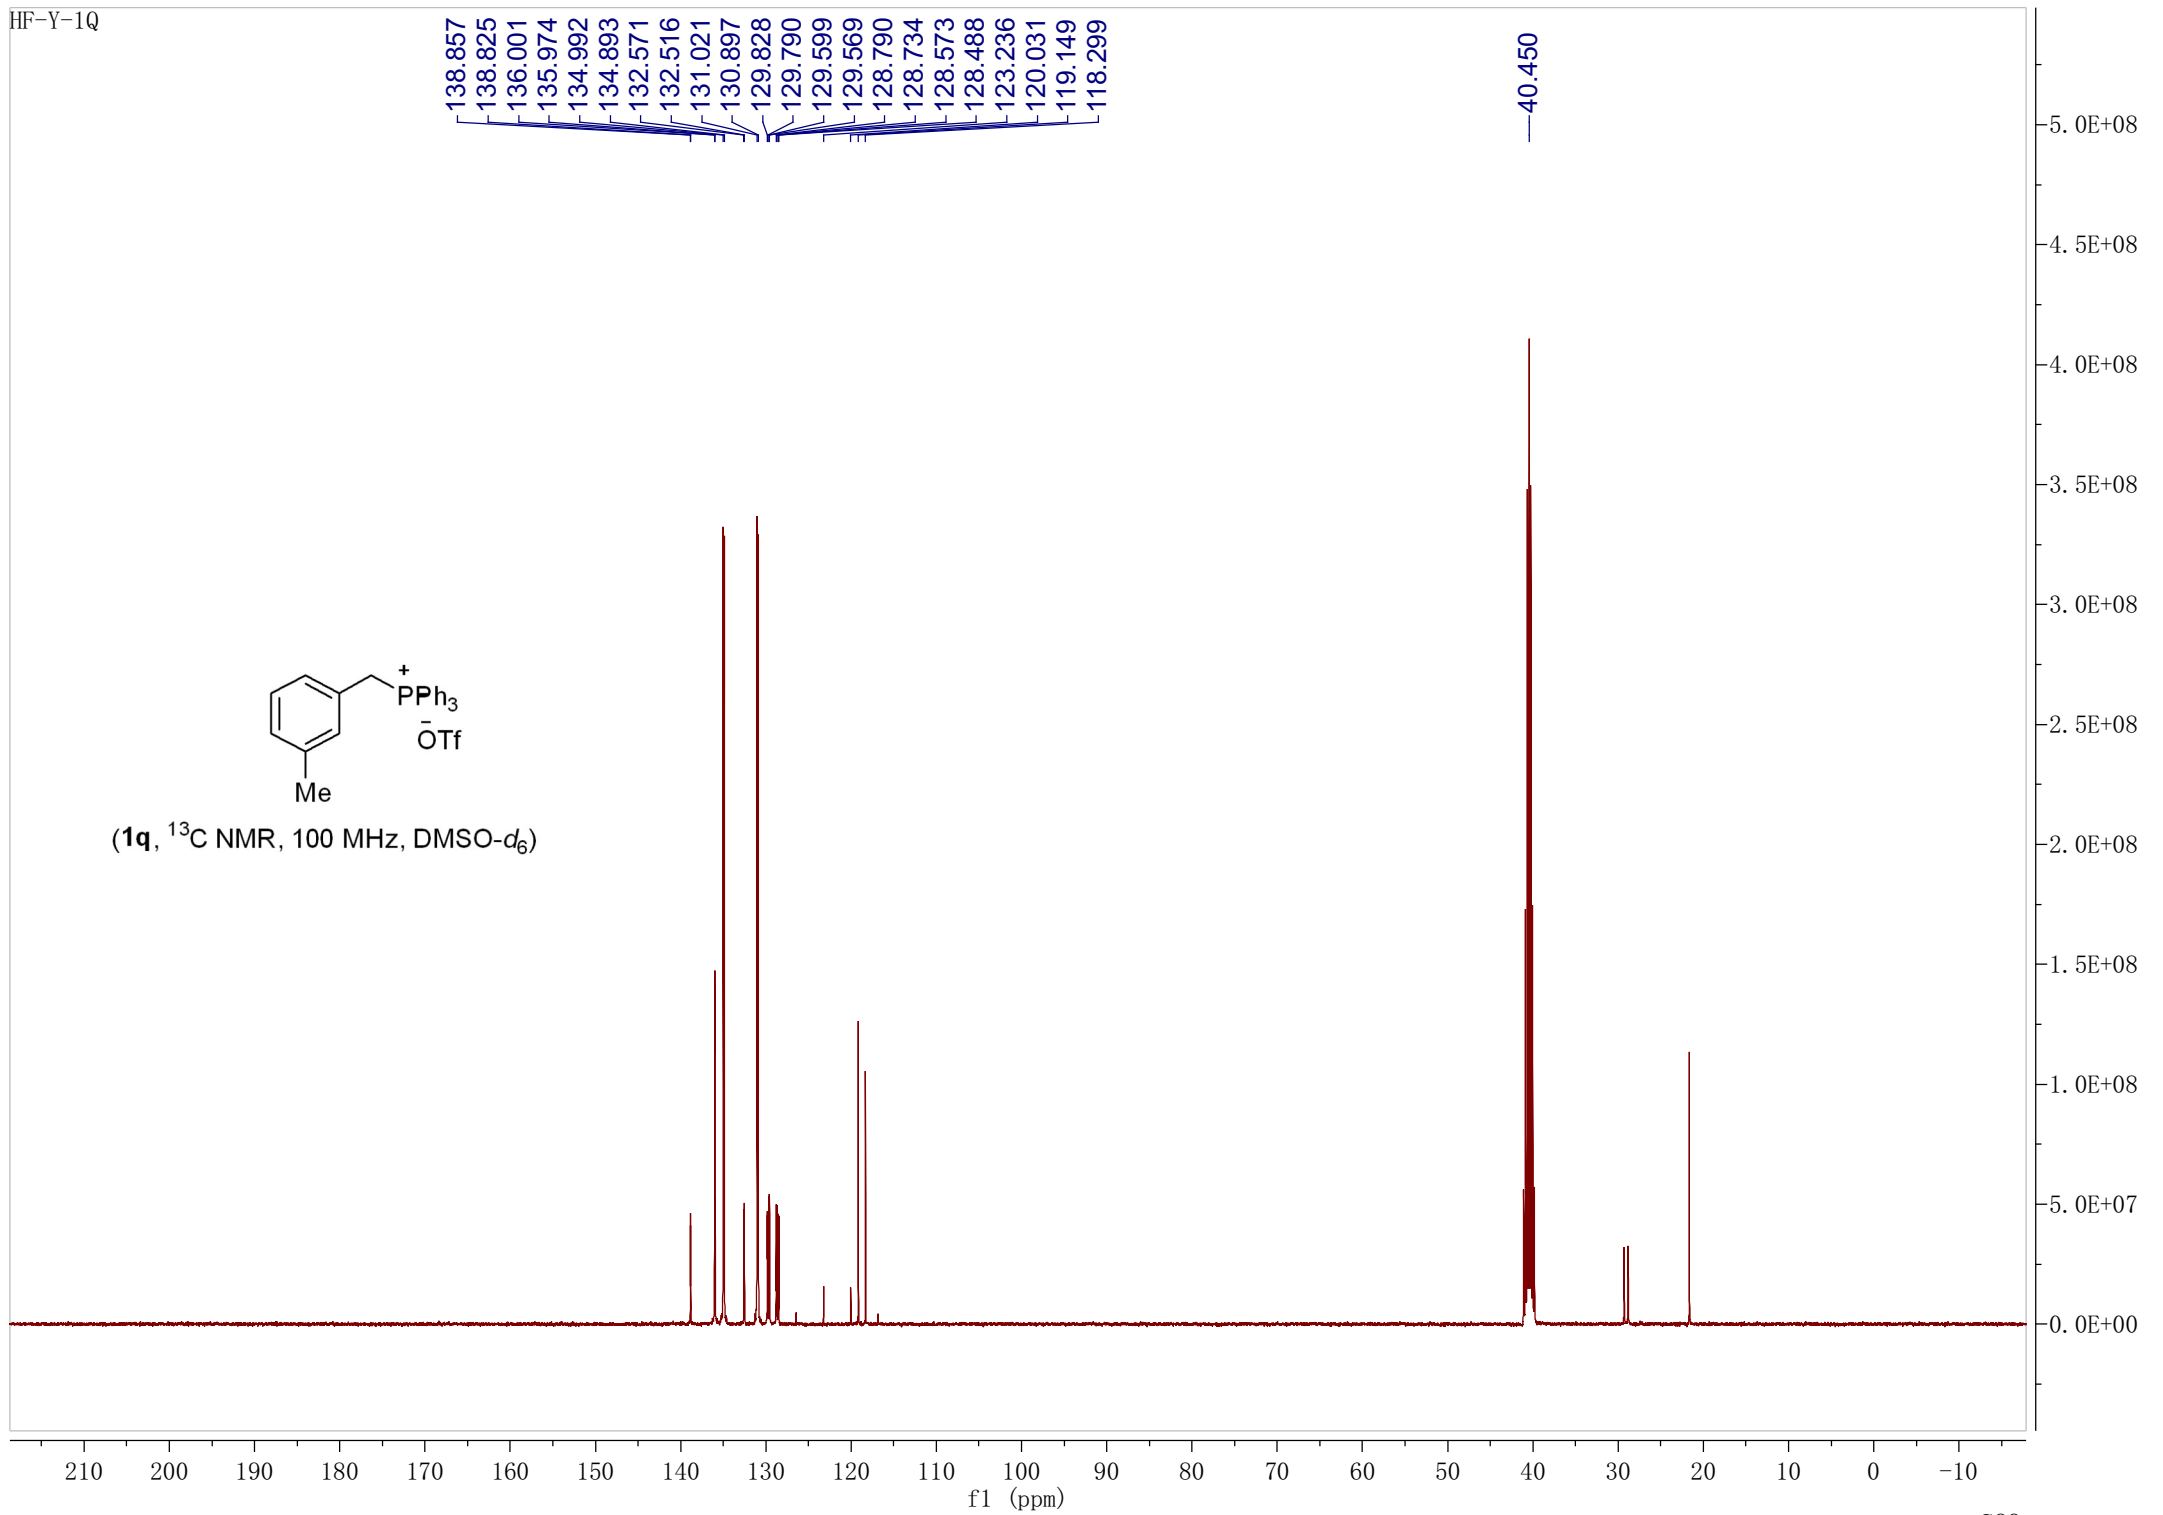



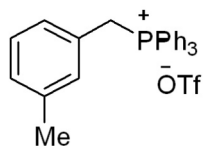

(**1q**, <sup>31</sup>P NMR, 162 MHz, DMSO-d<sub>6</sub>)

—23.027

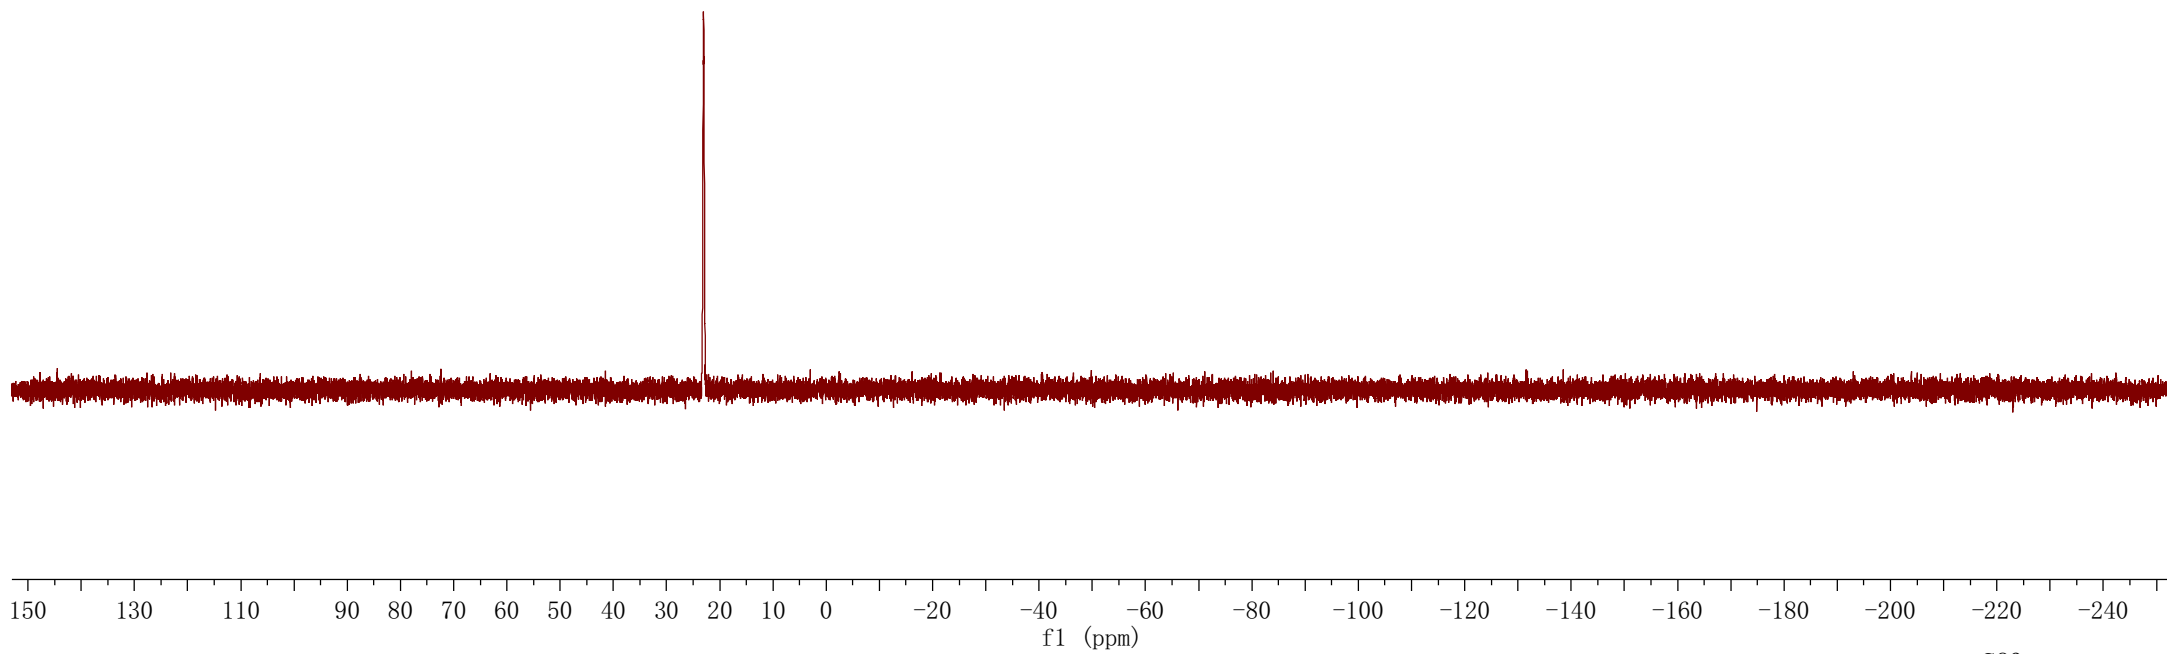

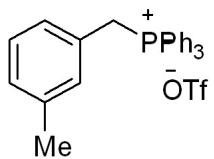

(**1q**,  $^{19}\text{F}$  NMR, 376 MHz,  $\text{DMSO-}d_6$ )

— -77.736

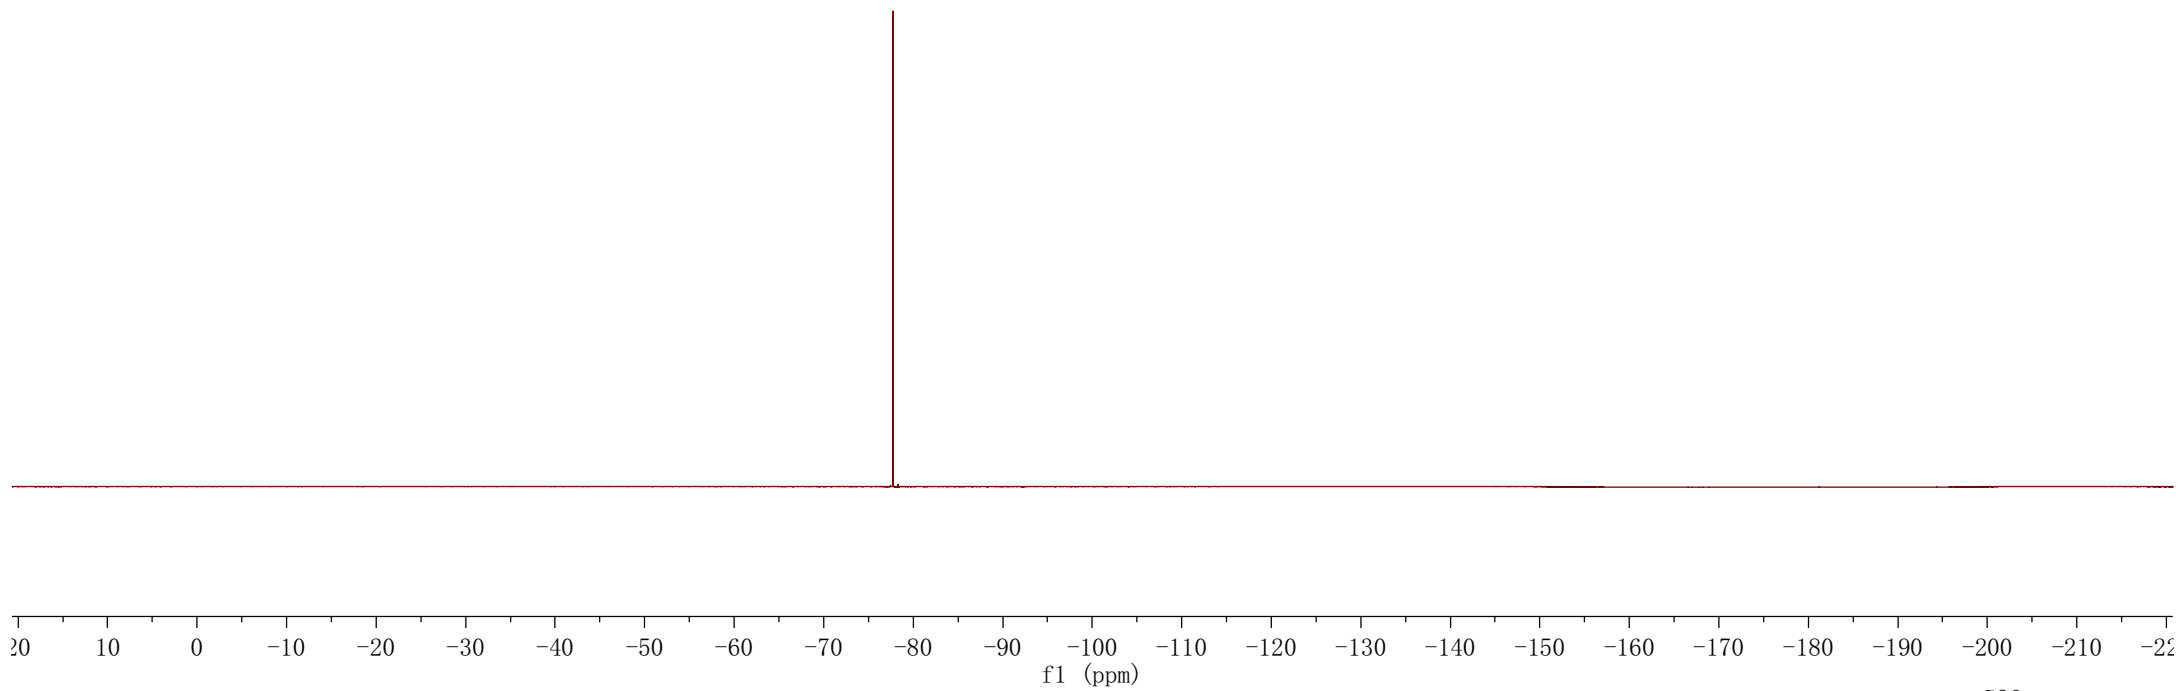

7.931  
7.915  
7.912  
7.895  
7.781  
7.772  
7.761  
7.752  
7.742  
7.733  
7.699  
7.680  
7.668  
7.649

6.419

6.107

5.038  
4.999

3.498

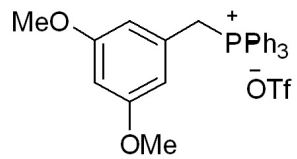

(1r, <sup>1</sup>H NMR, 400 MHz, DMSO-d<sub>6</sub>)

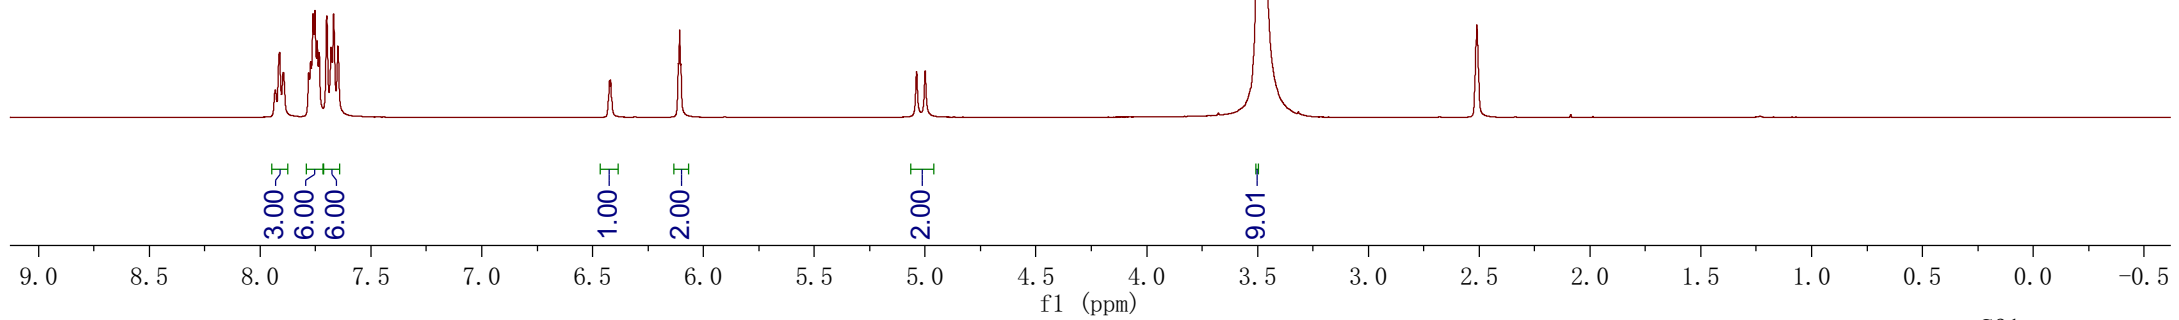

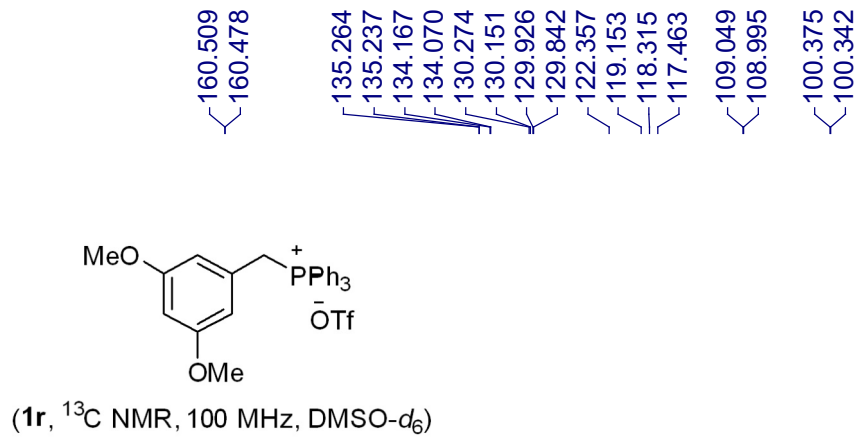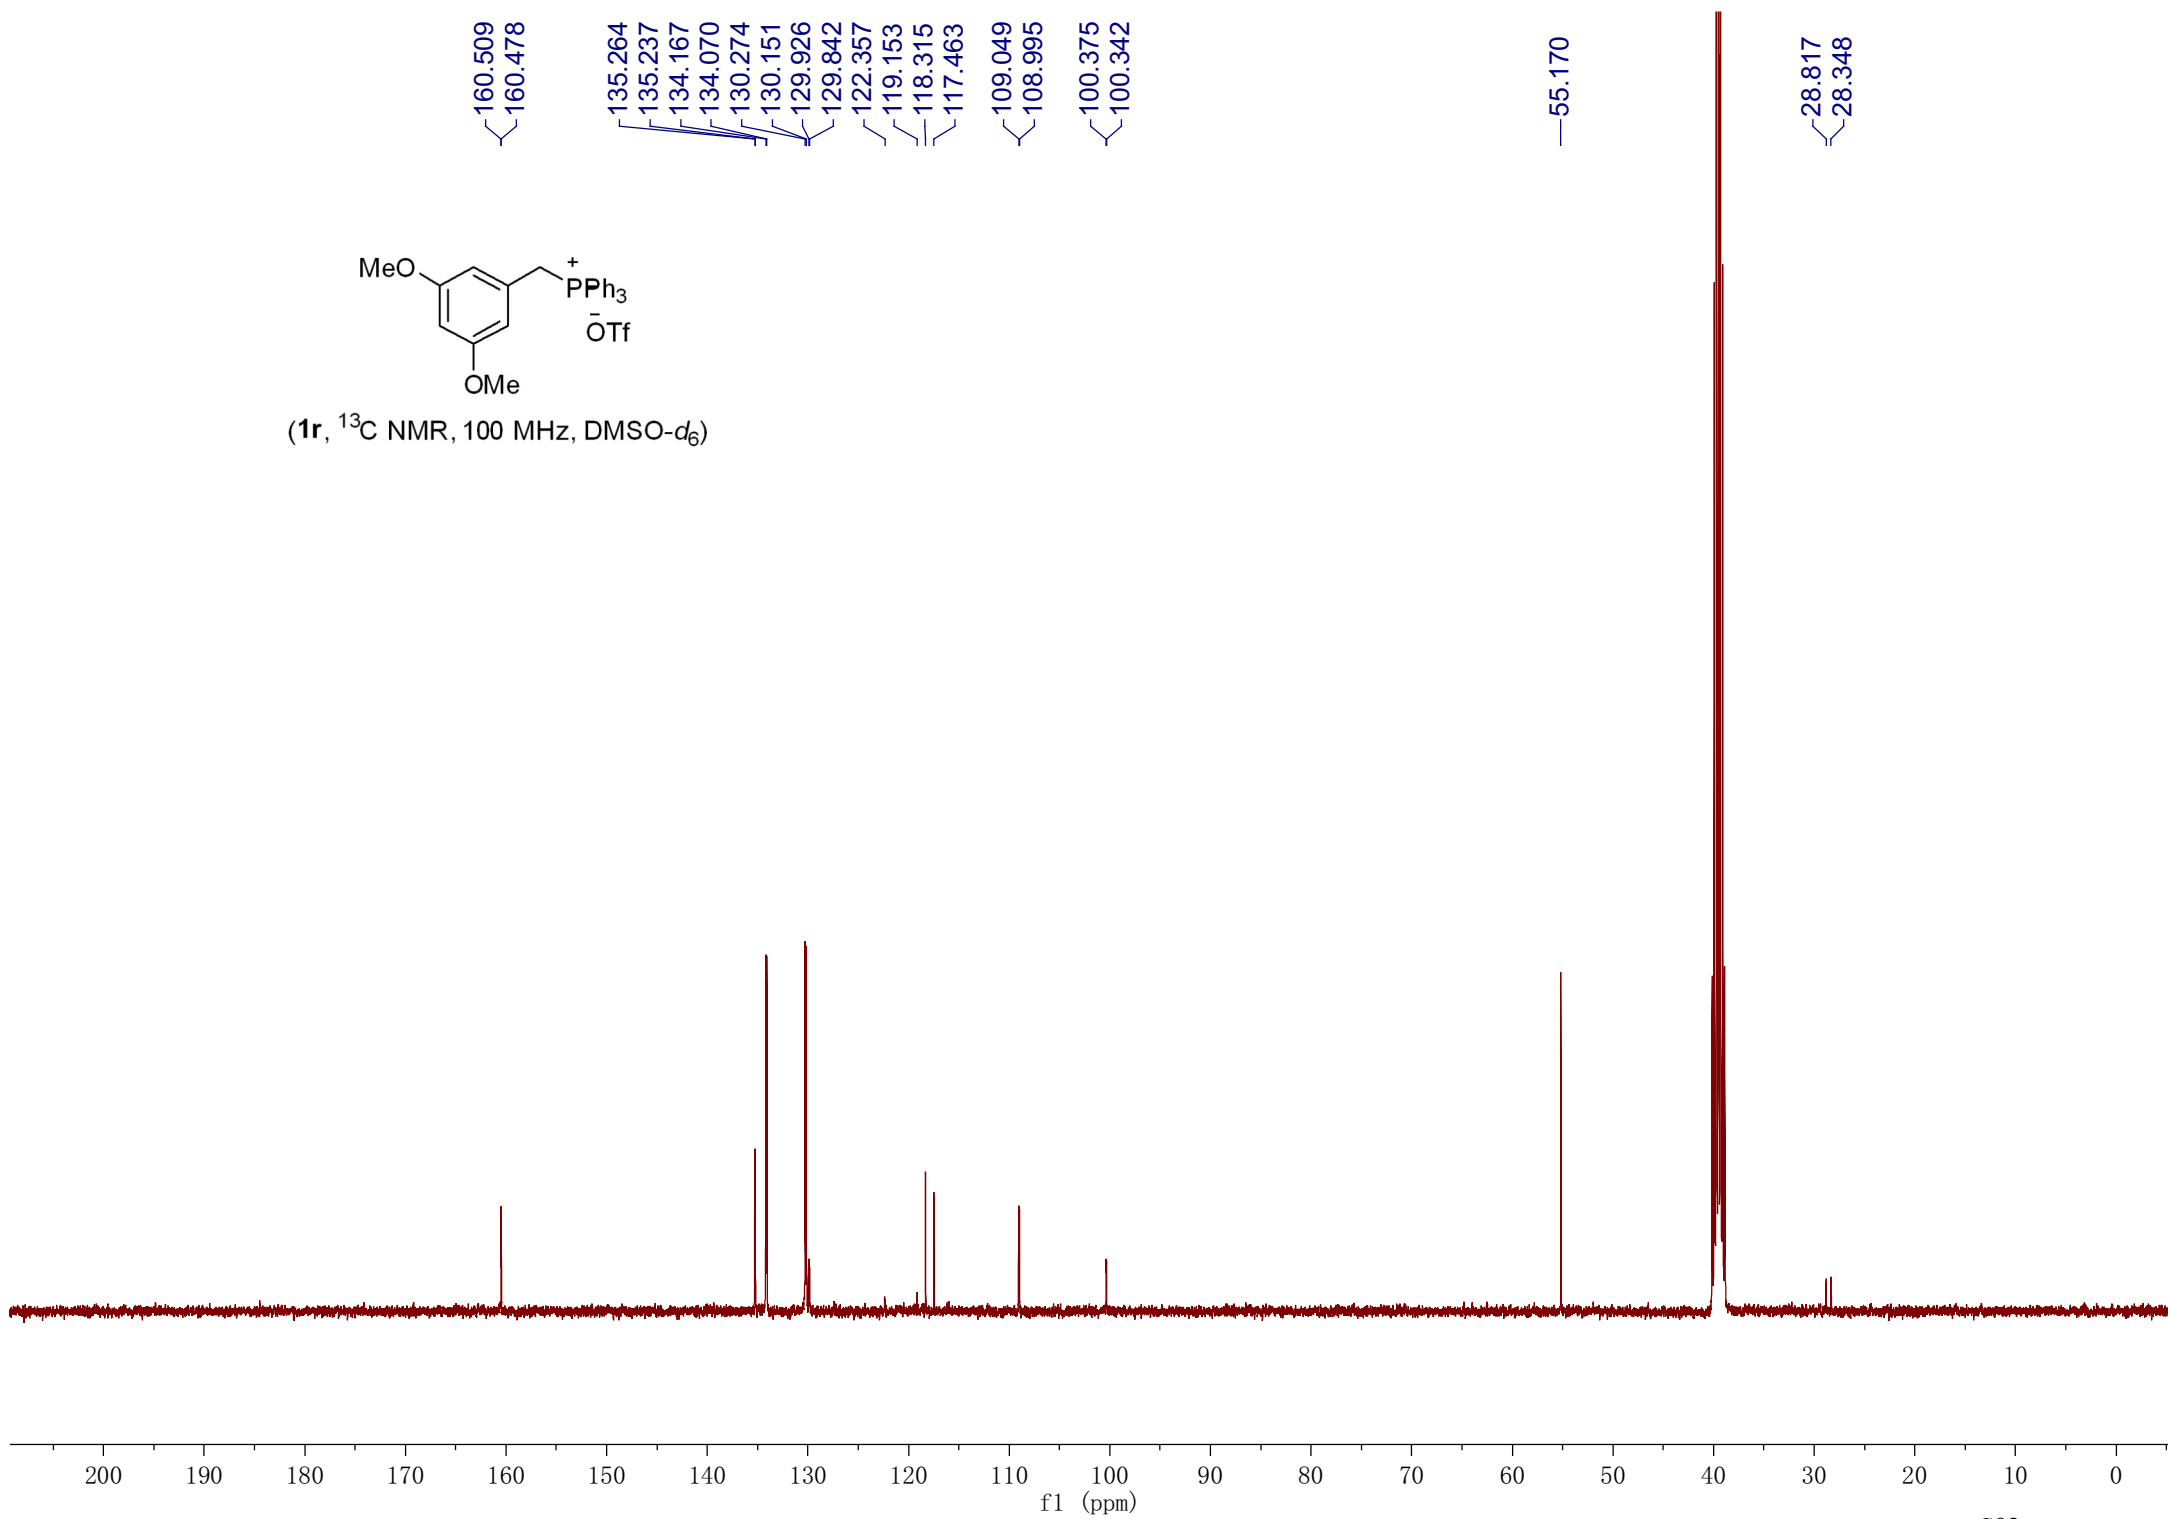

—23.043

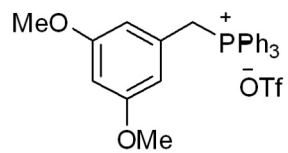

(**1r**, <sup>31</sup>P NMR, 162 MHz, DMSO-*d*<sub>6</sub>)

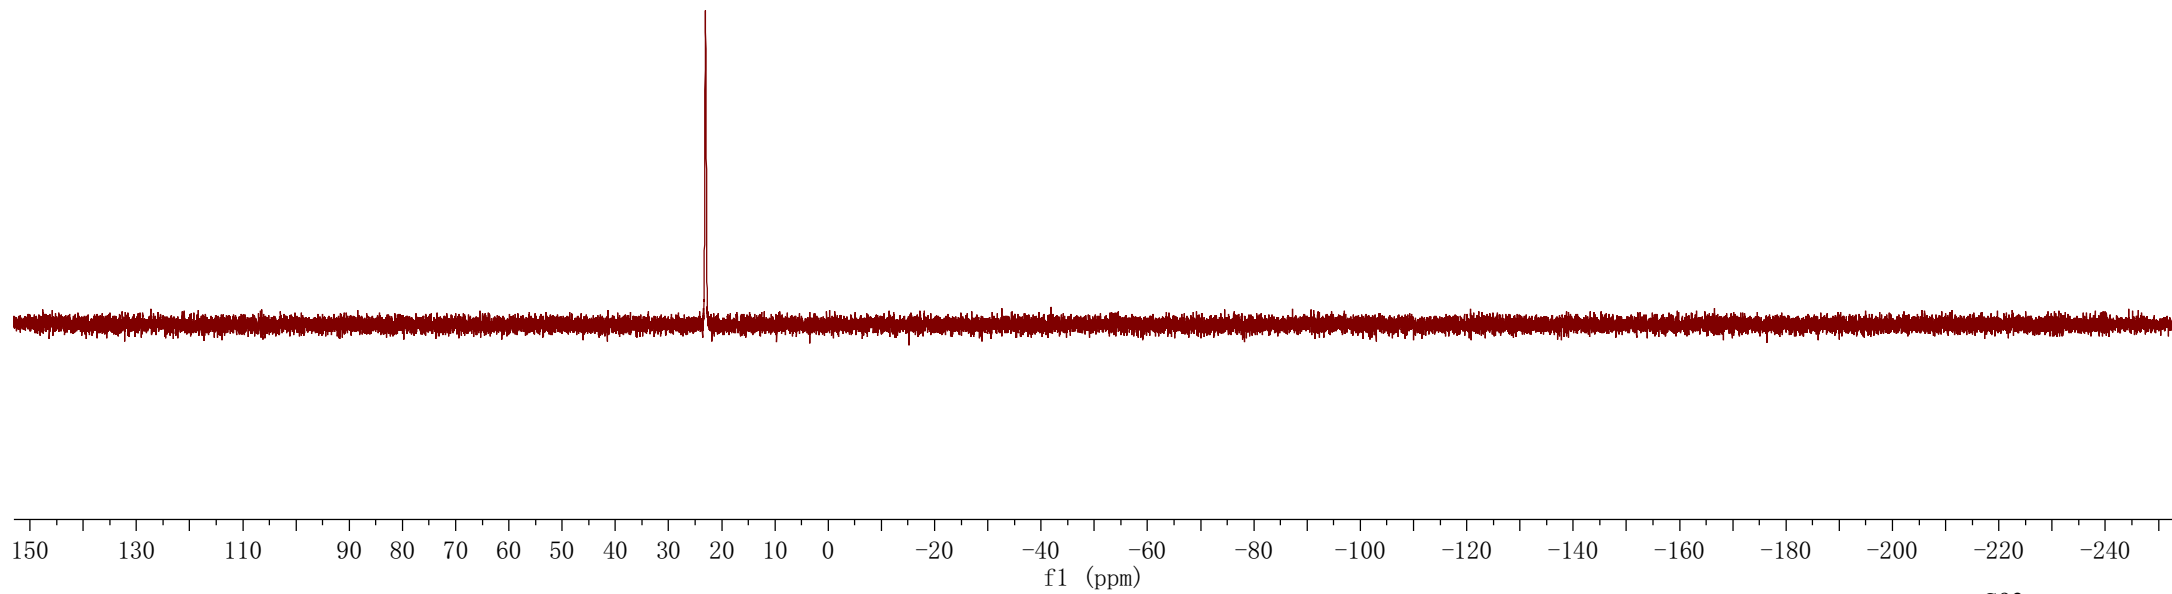

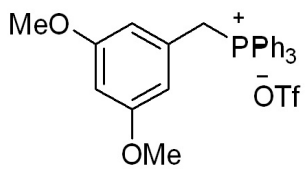

(**1r**,  $^{19}\text{F}$  NMR, 376 MHz,  $\text{DMSO-}d_6$ )

-77.758

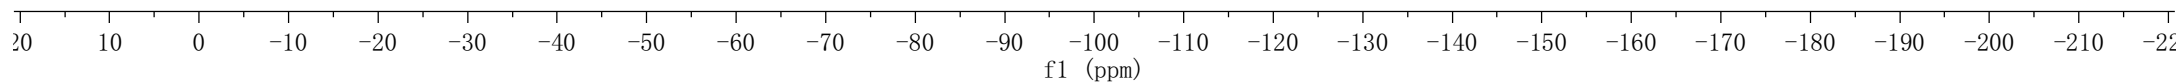

7.914  
7.888  
7.867  
7.844  
7.834  
7.829  
7.823  
7.813  
7.808  
7.686  
7.664  
7.645  
7.635  
7.632  
7.619  
7.614  
7.599  
7.394  
7.374  
7.355  
7.336  
7.310  
7.303  
7.113  
5.595  
5.556

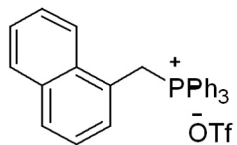

(1s,  $^1\text{H}$  NMR, 400 MHz,  $\text{DMSO-}d_6$ )

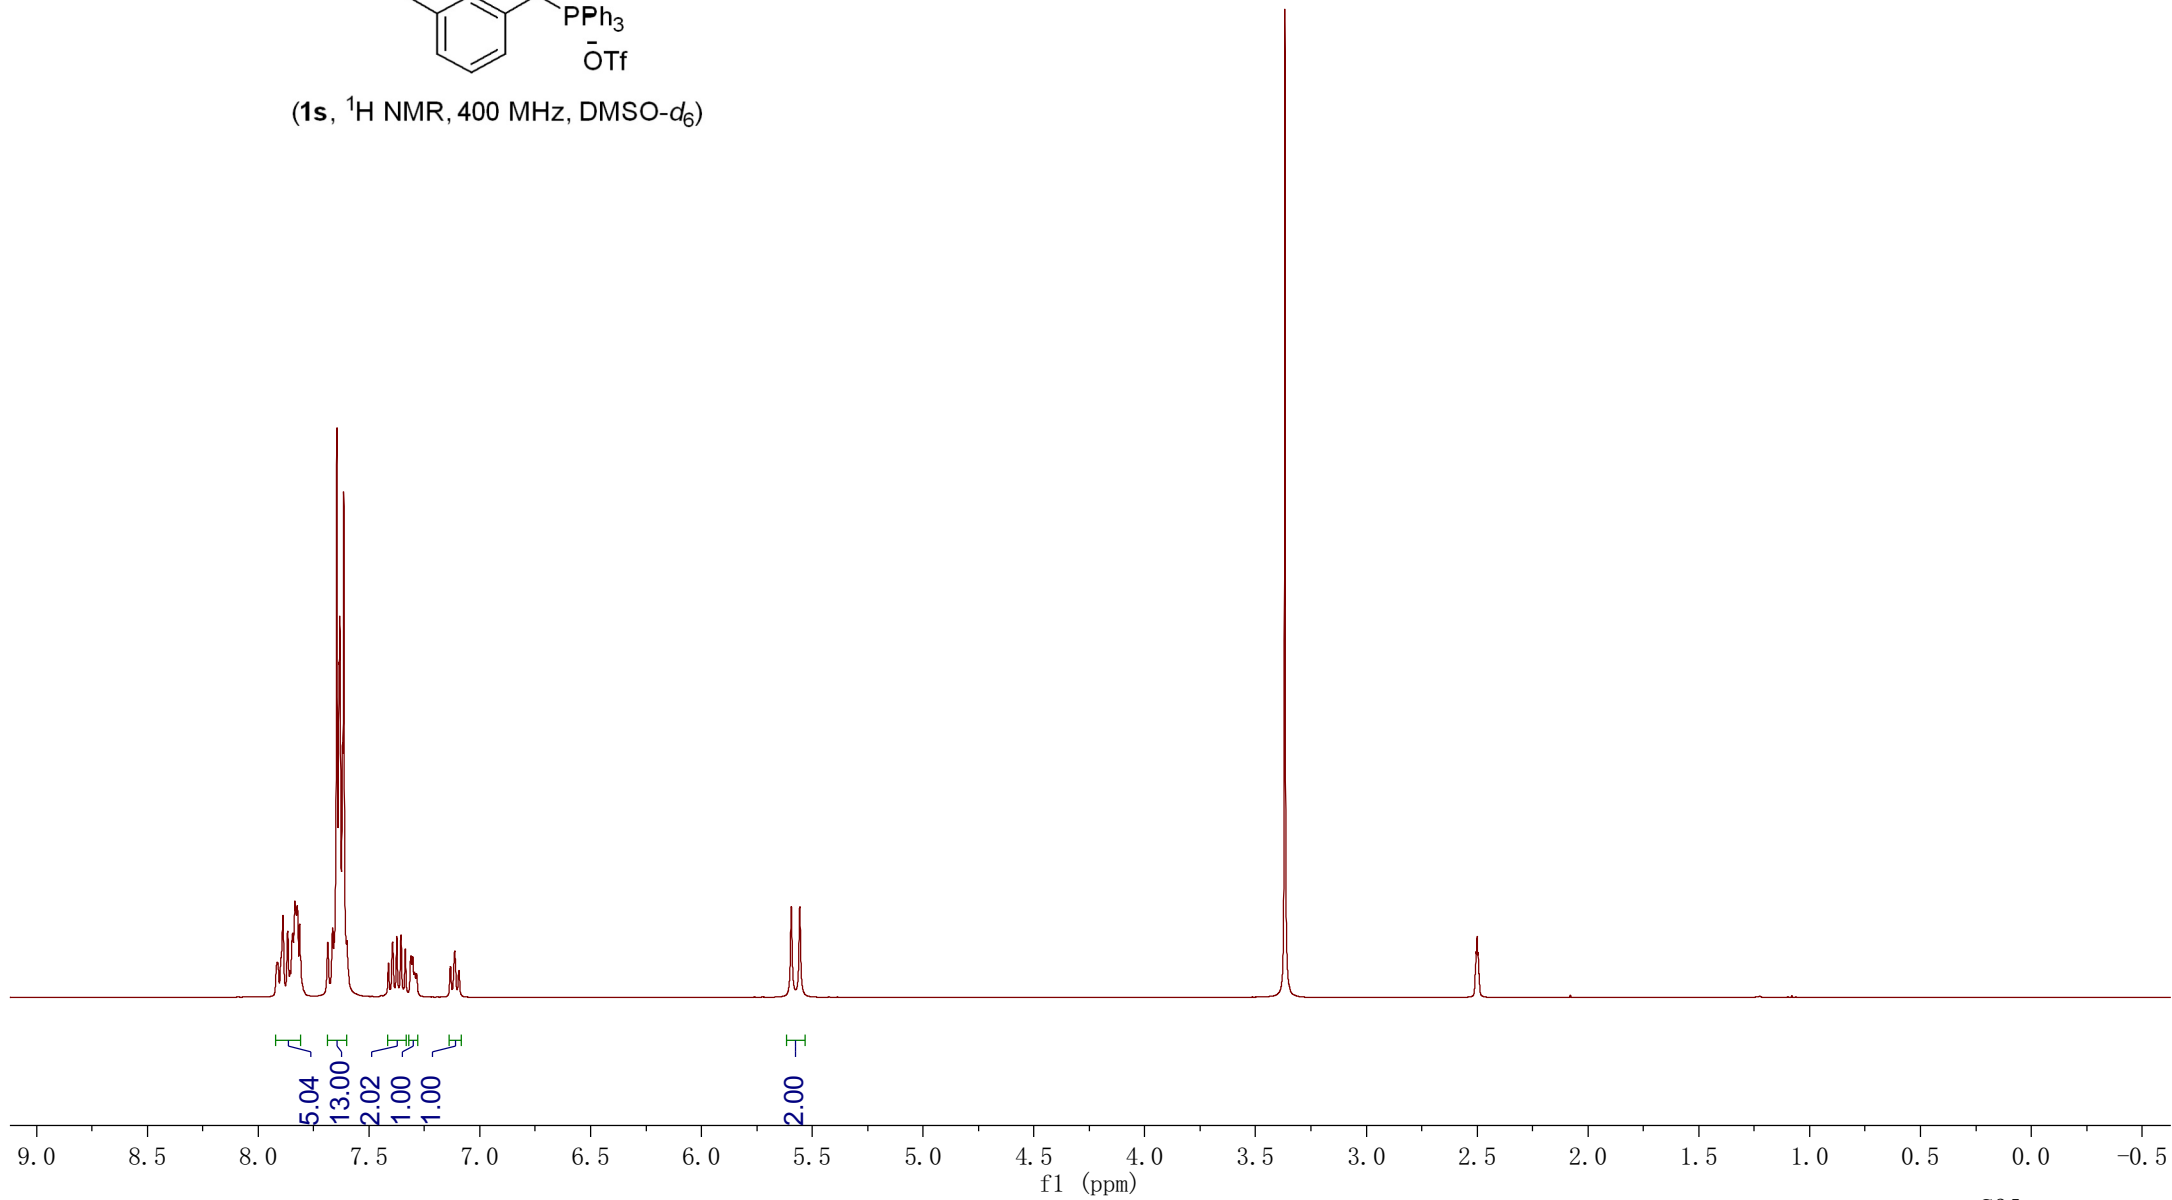

(1s, <sup>13</sup>C NMR, 100 MHz, DMSO-d<sub>6</sub>)

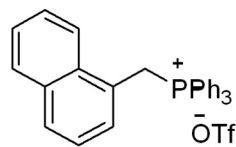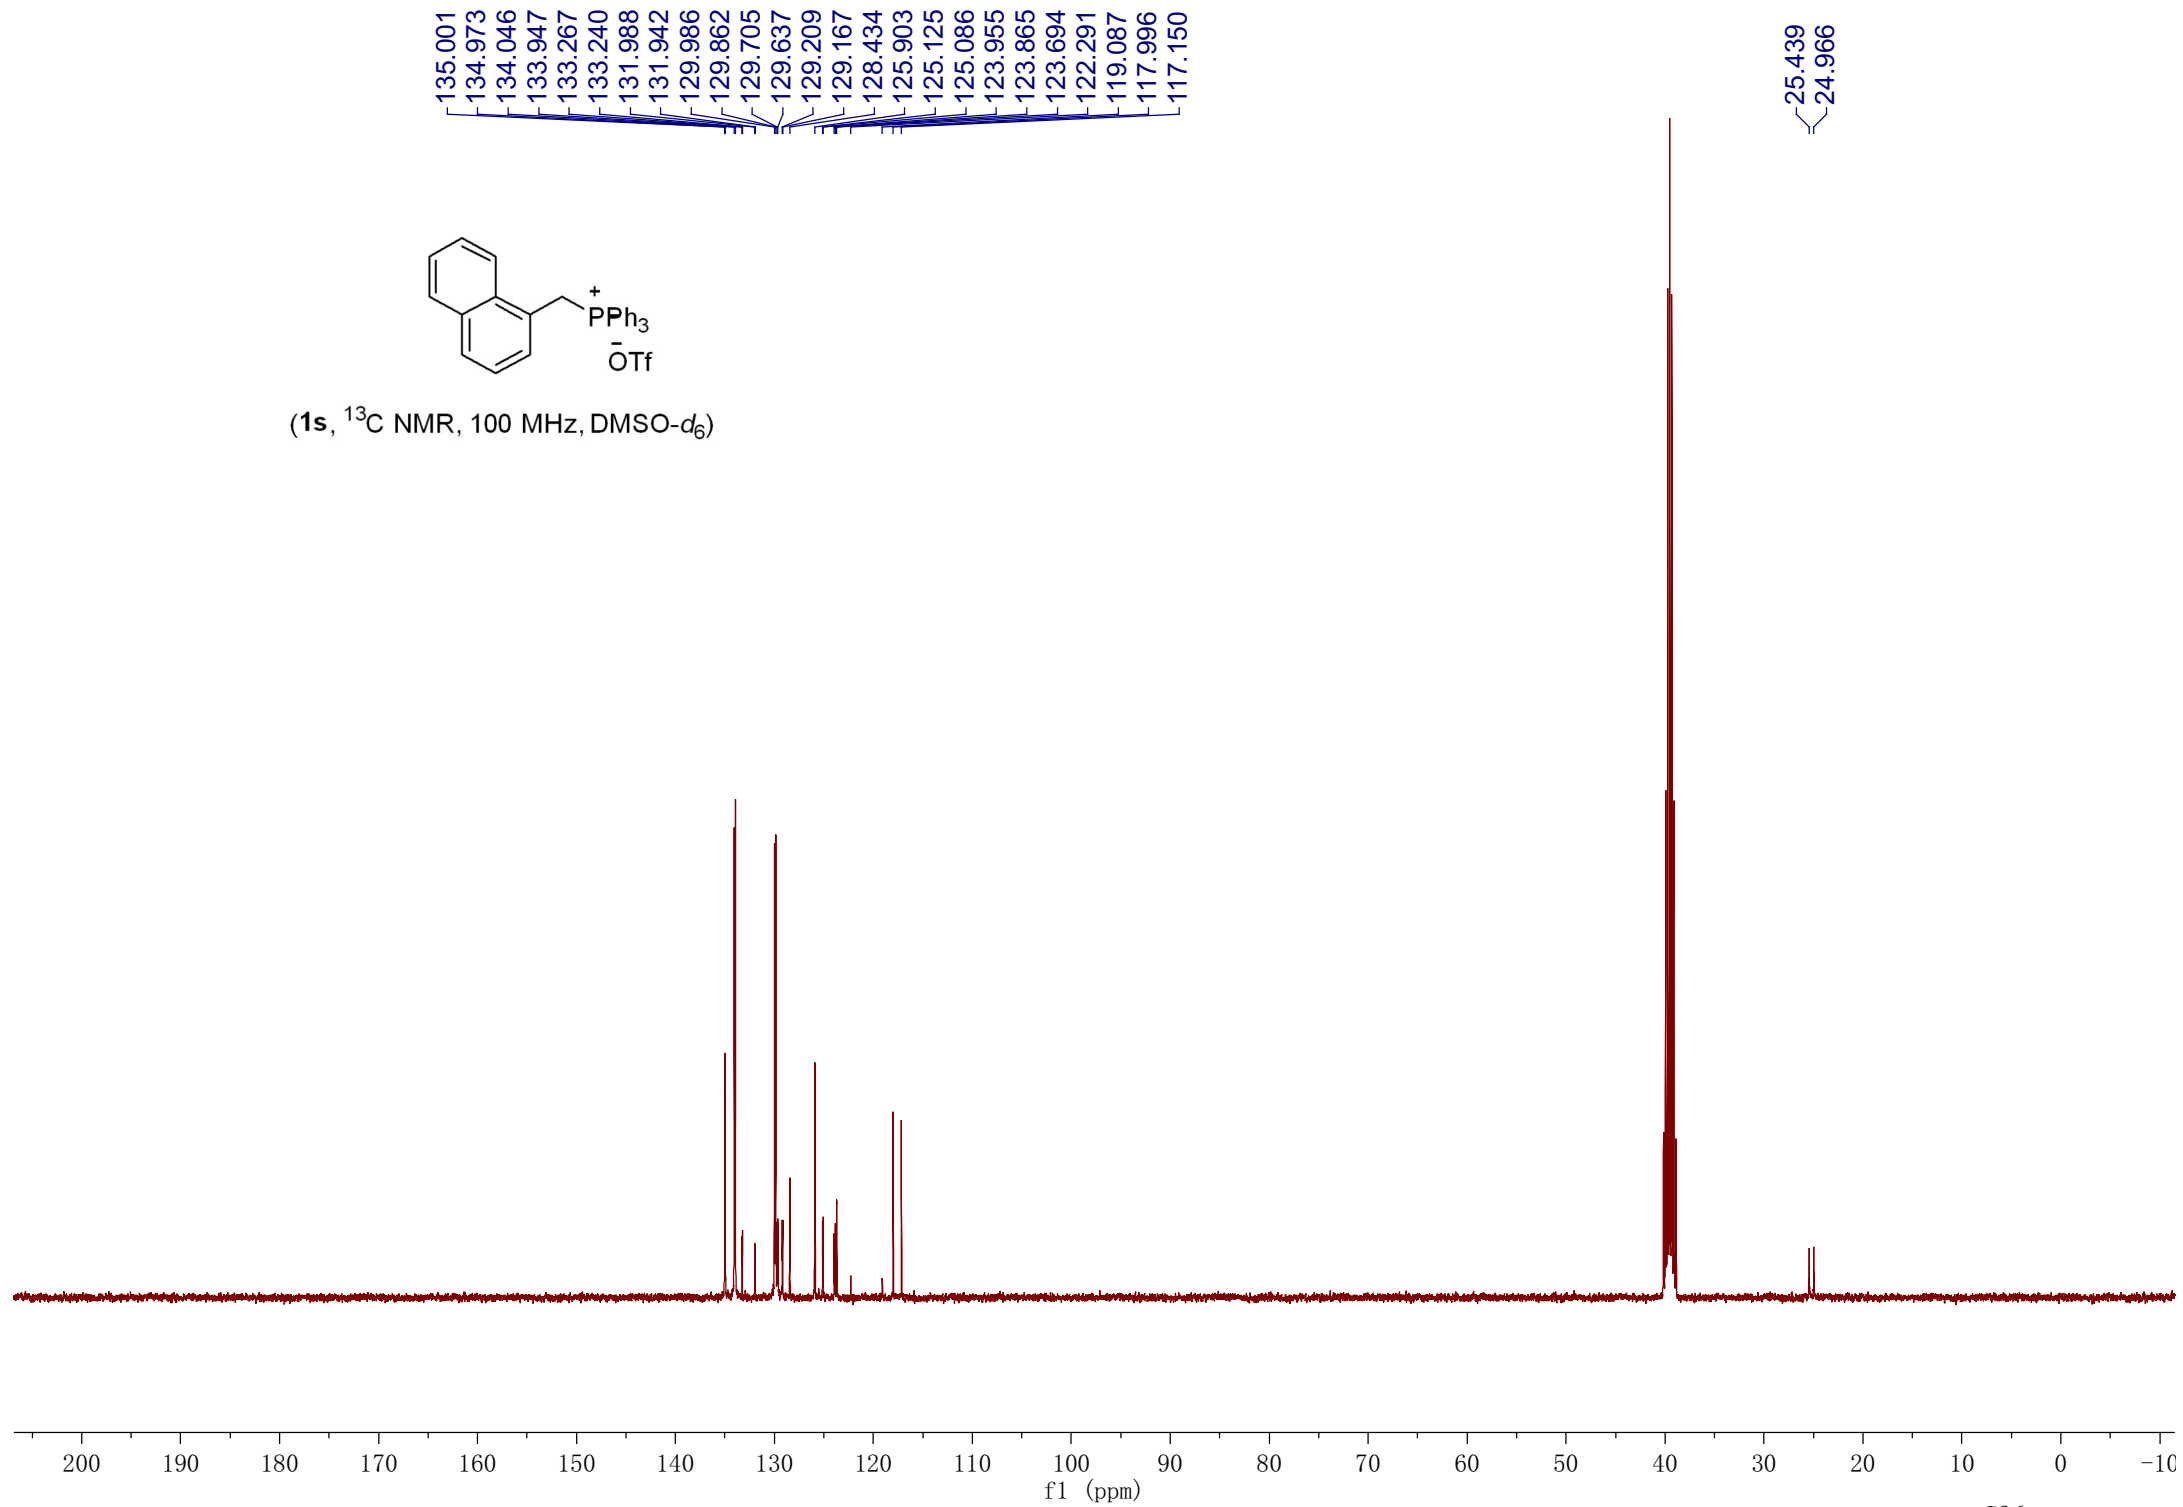



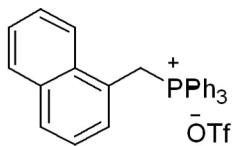

(1s,  $^{31}\text{P}$  NMR, 162 MHz,  $\text{DMSO-}d_6$ )

—22.817

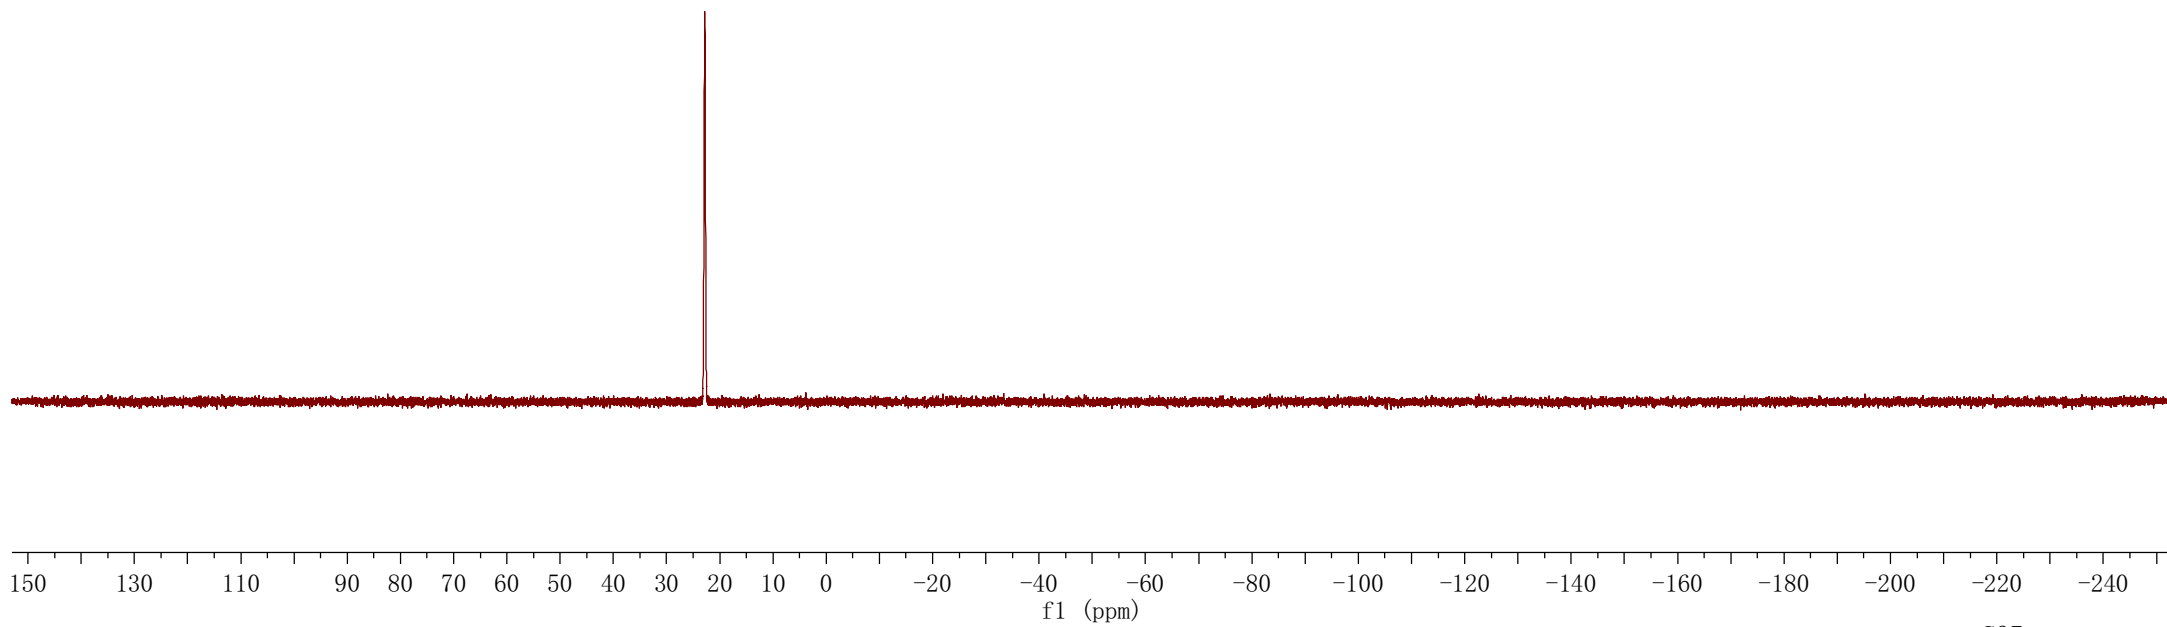

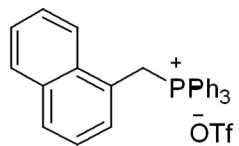

(1s,  $^{19}\text{F}$  NMR, 376 MHz,  $\text{DMSO-}d_6$ )

---77.697

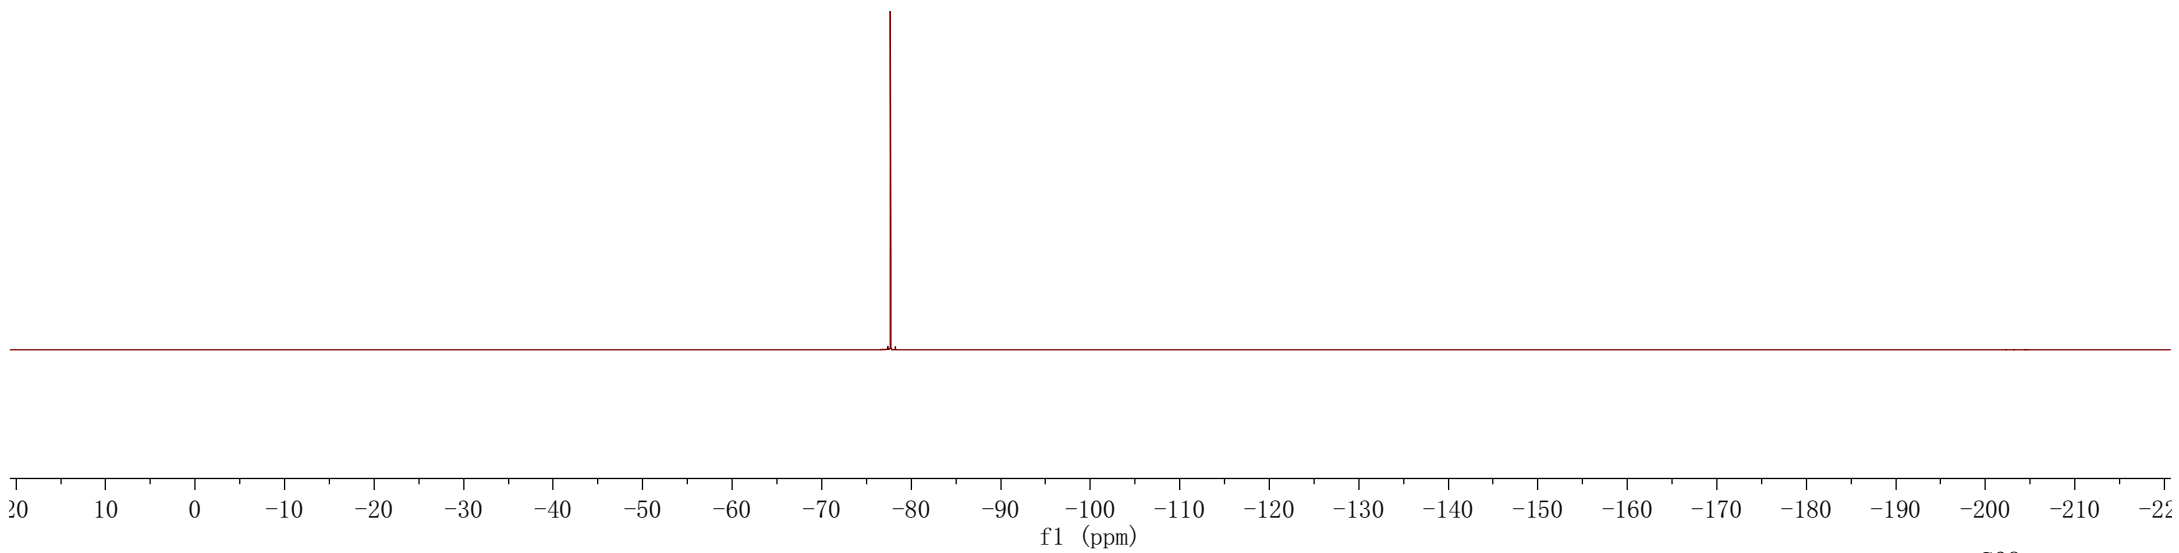

7.906  
7.888  
7.770  
7.755  
7.744  
7.731  
7.727  
7.716  
7.698  
7.680  
7.501  
7.494  
7.488  
7.484  
7.075  
7.054

5.341  
5.302

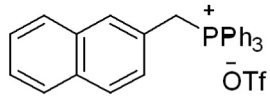

(1t,  $^1\text{H}$  NMR, 400 MHz,  $\text{DMSO-}d_6$ )

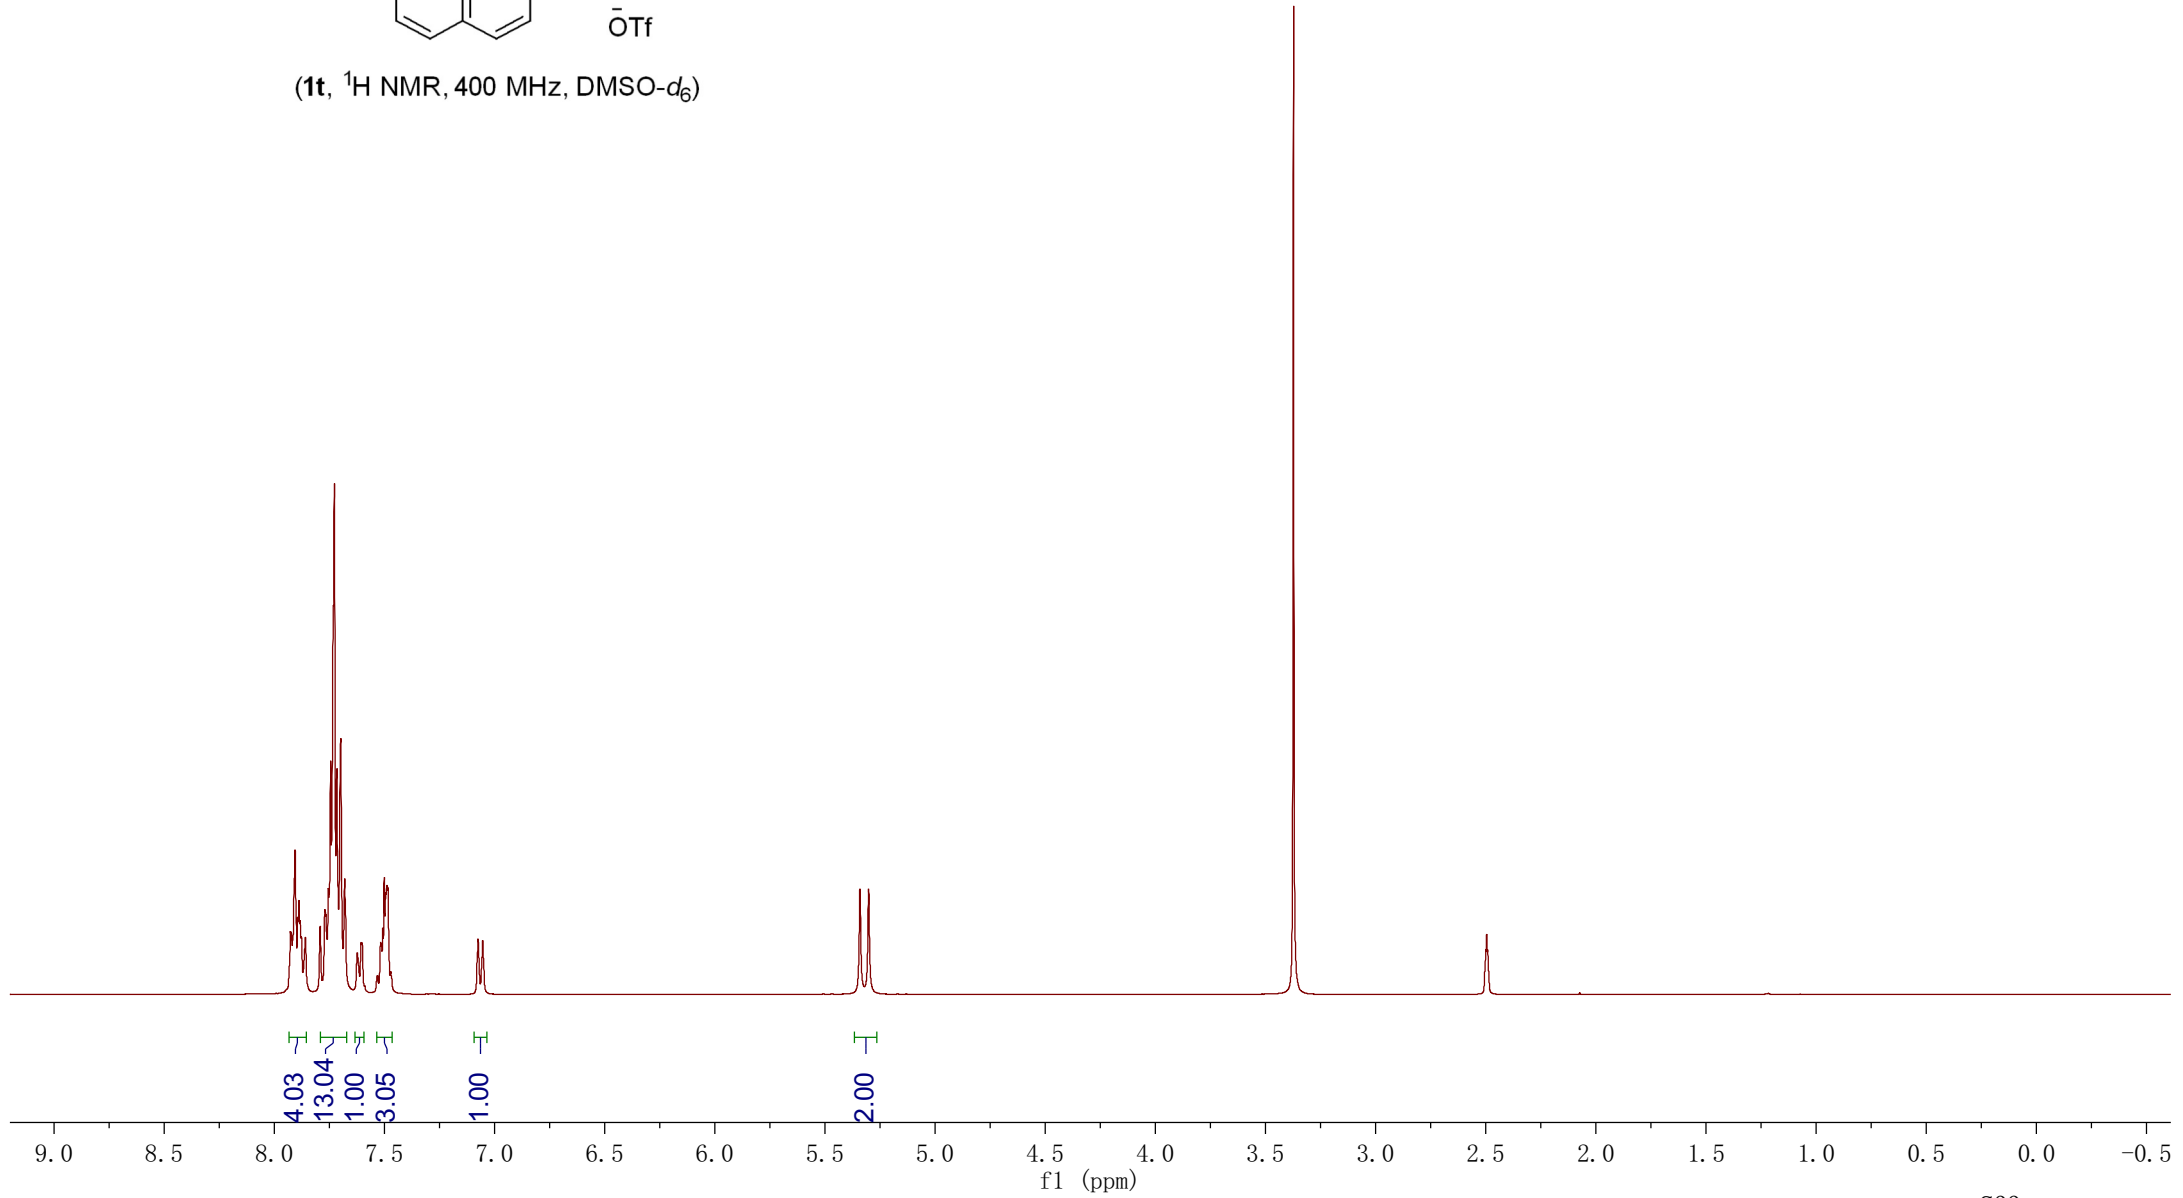

135.119  
135.091  
134.058  
133.959  
132.493  
132.462  
132.189  
132.163  
130.353  
130.280  
130.159  
130.036  
128.346  
128.323  
127.998  
127.956  
127.635  
127.360  
126.820  
126.731  
125.398  
125.308  
122.303  
119.100  
118.199  
117.348

28.661  
28.197

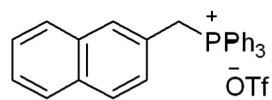

(1t,  $^{13}\text{C}$  NMR, 100 MHz,  $\text{DMSO-}d_6$ )

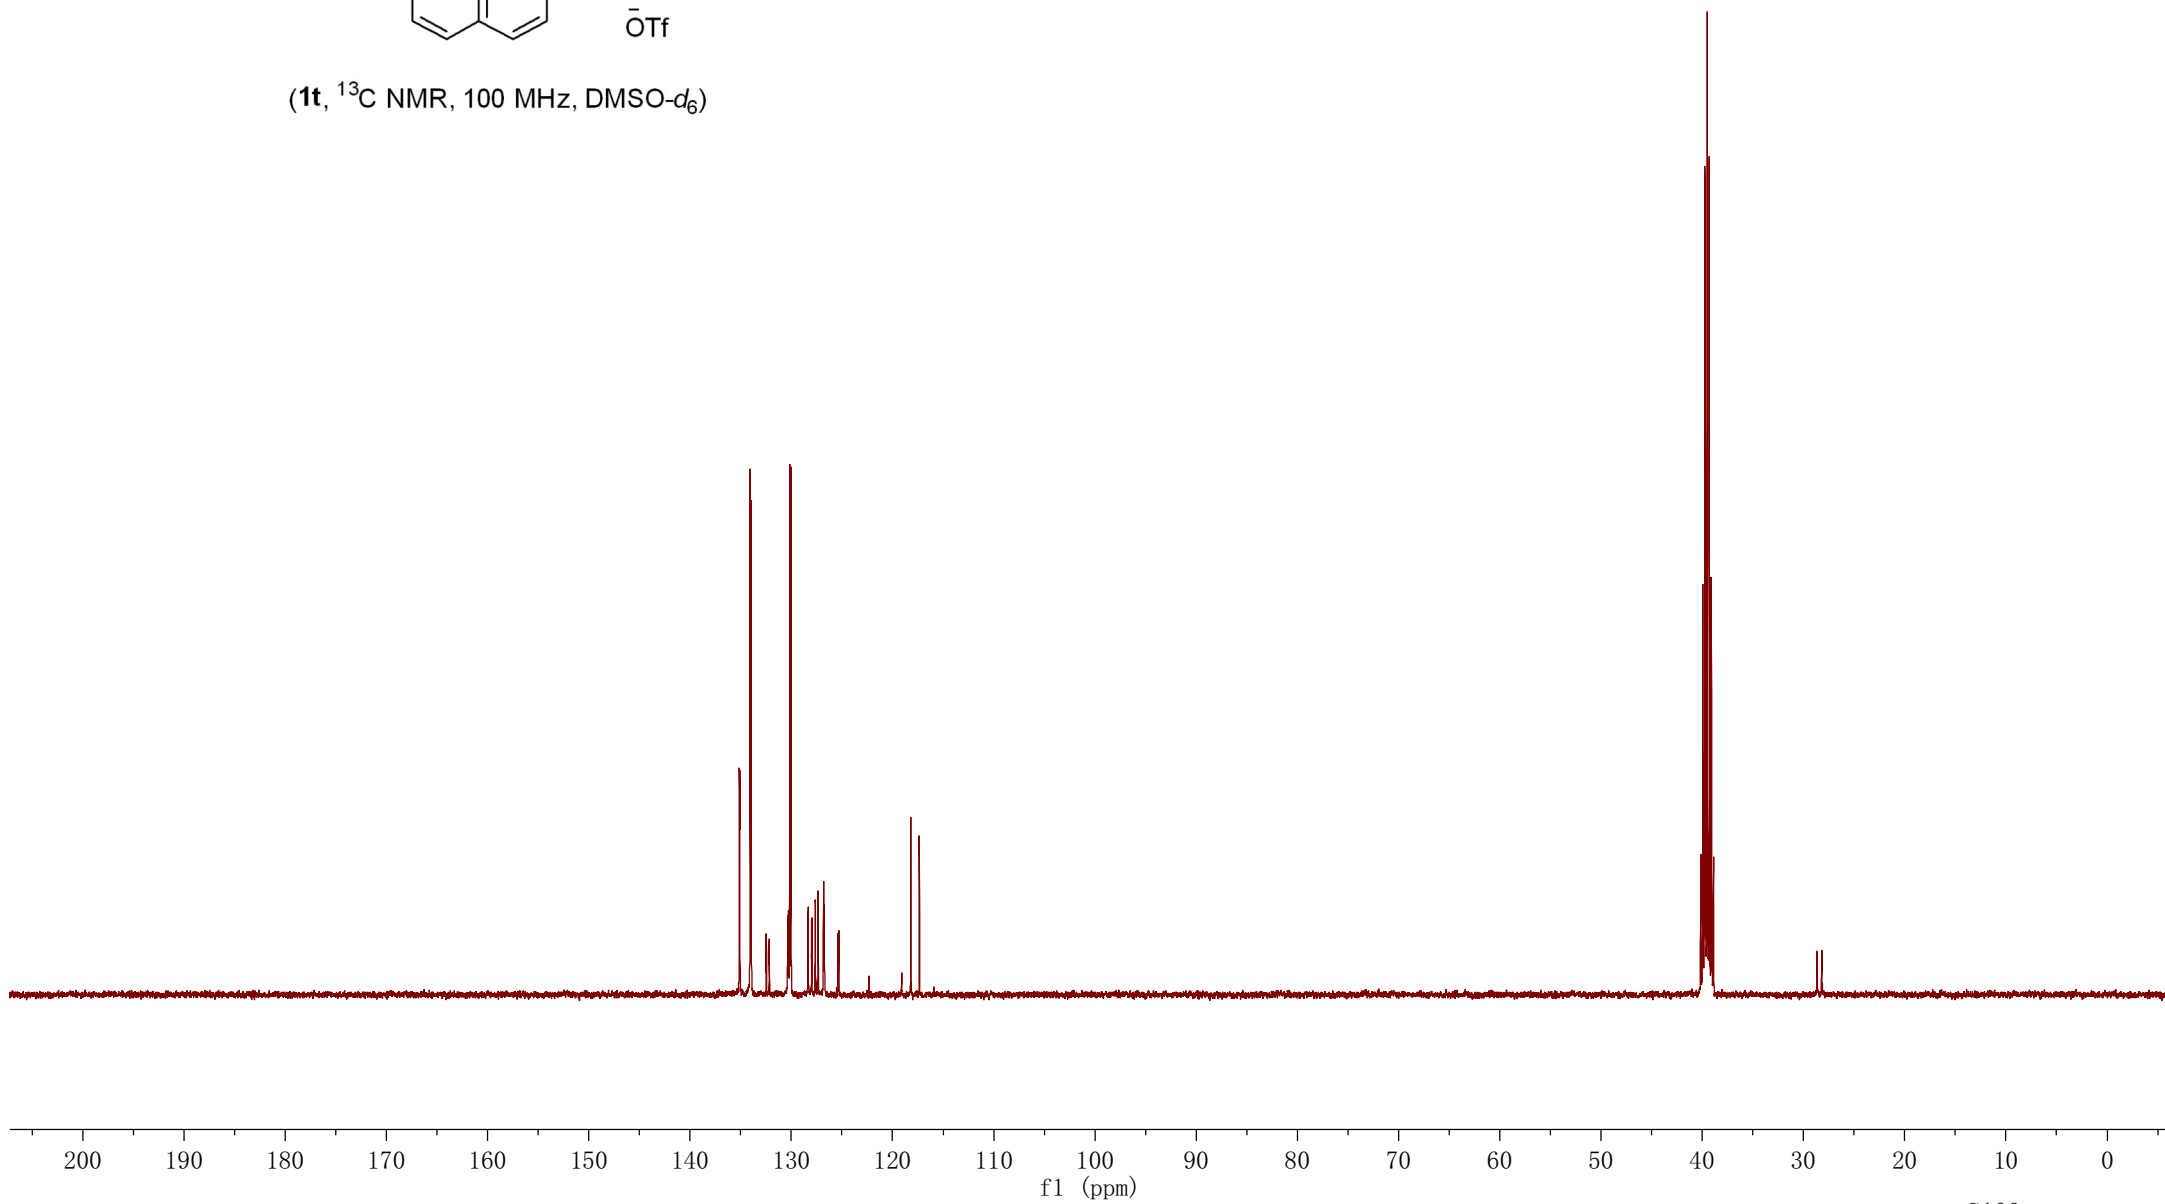

—22.915

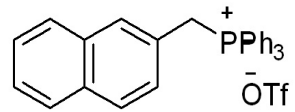

(1t,  $^{31}\text{P}$  NMR, 162 MHz,  $\text{DMSO-}d_6$ )

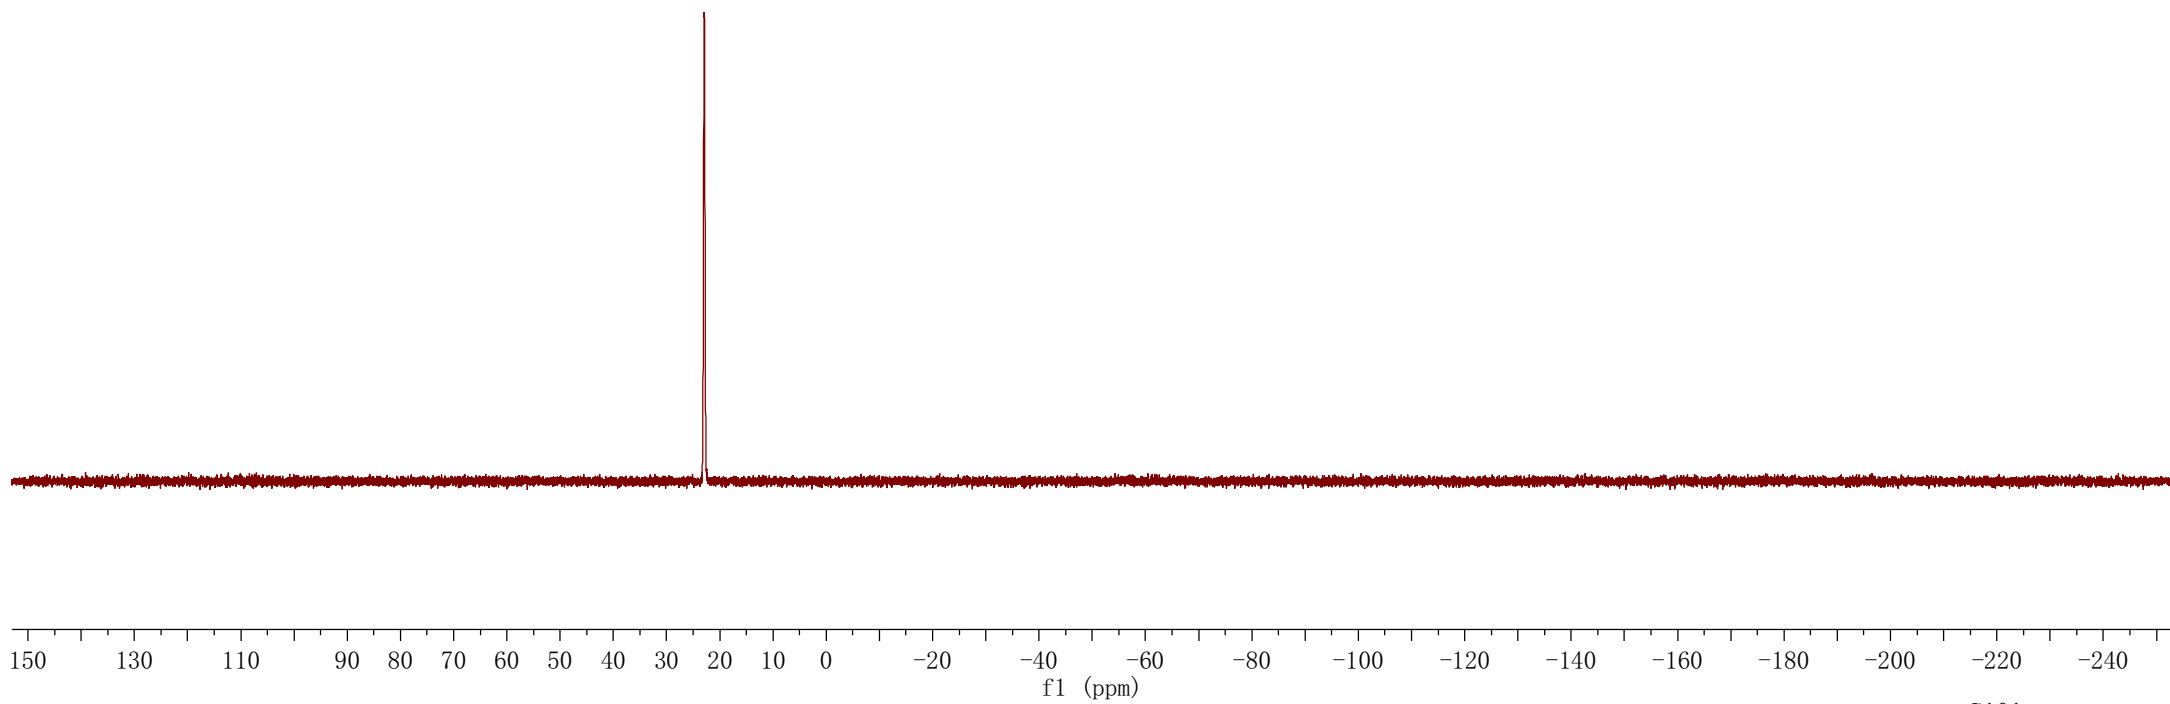

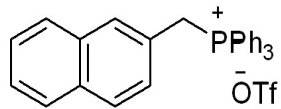

(**1t**,  $^{19}\text{F}$  NMR, 376 MHz,  $\text{DMSO-}d_6$ )

—77.688

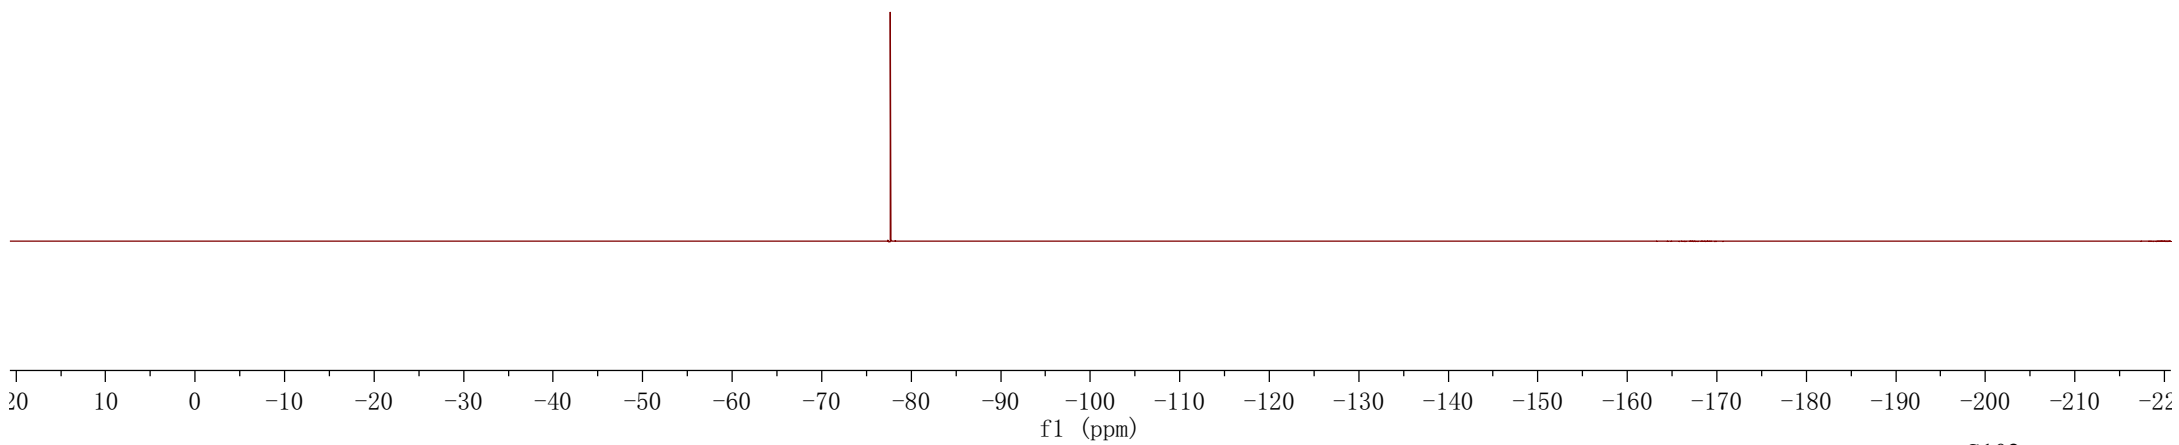

7.927  
7.908  
7.891  
7.769  
7.760  
7.749  
7.740  
7.730  
7.721  
7.697  
7.678  
7.675  
7.668  
7.649  
7.296  
7.277  
6.967  
6.948  
6.850  
5.632  
5.614  
5.595  
5.577  
5.559

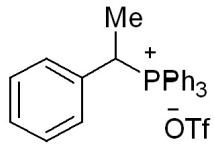

(1u, <sup>1</sup>H NMR, 400 MHz, DMSO-d<sub>6</sub>)

1.771  
1.753  
1.724  
1.706

-0.009

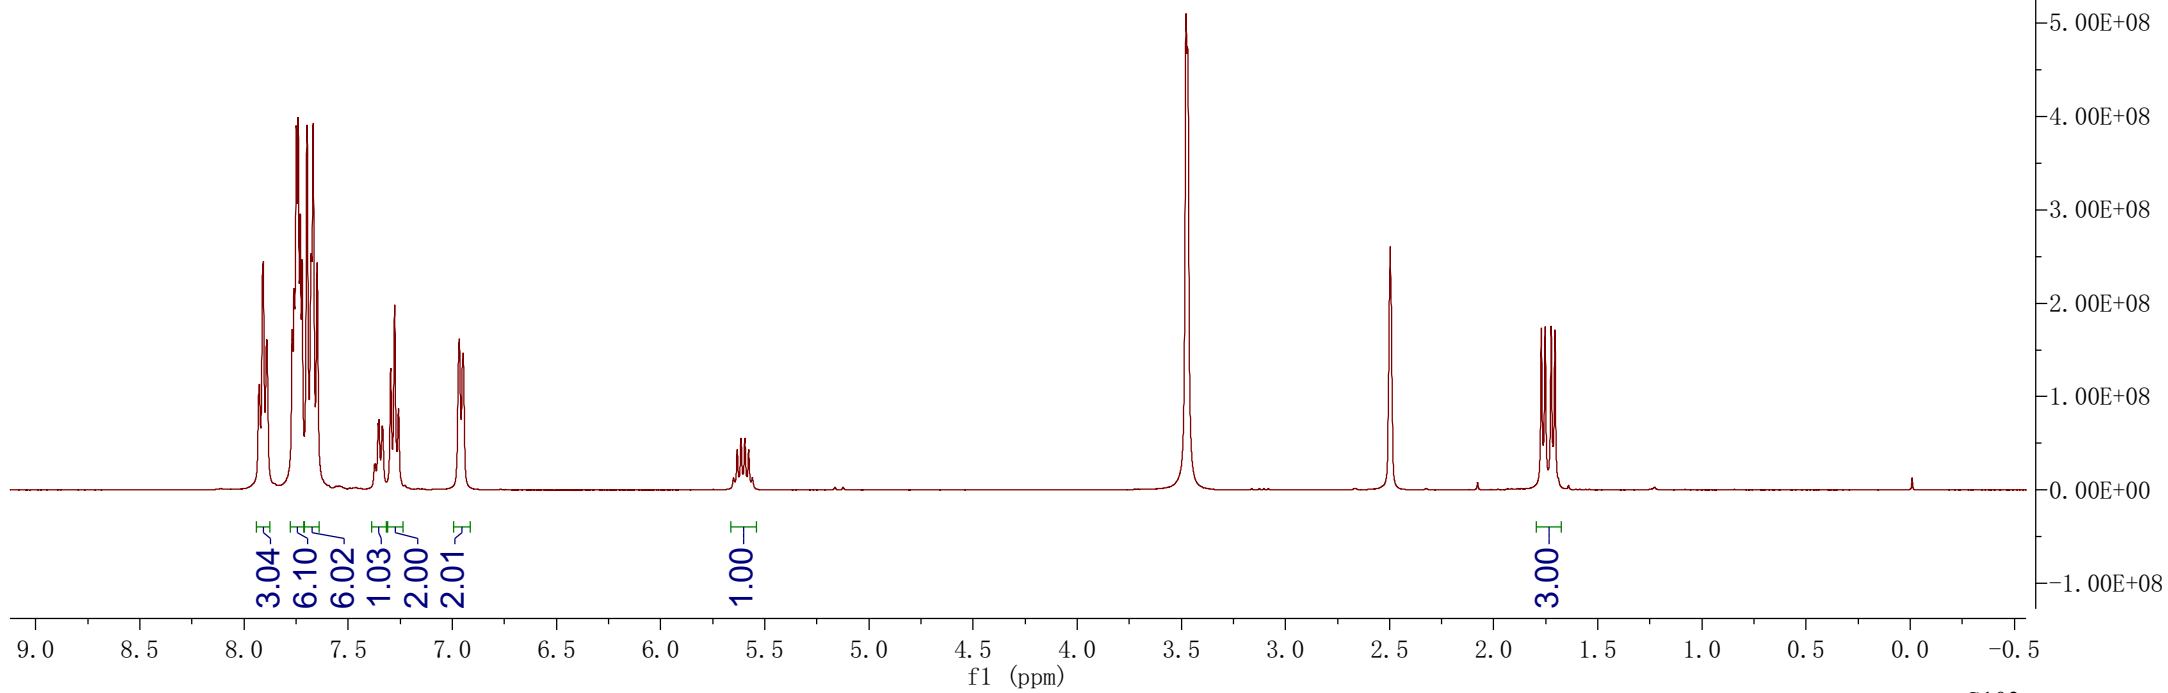

3.04  
6.10  
6.02  
1.03  
2.00  
2.01

1.00

3.00

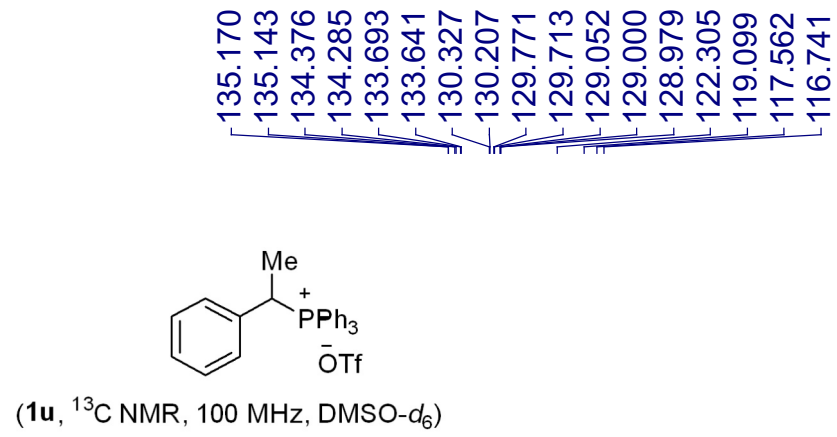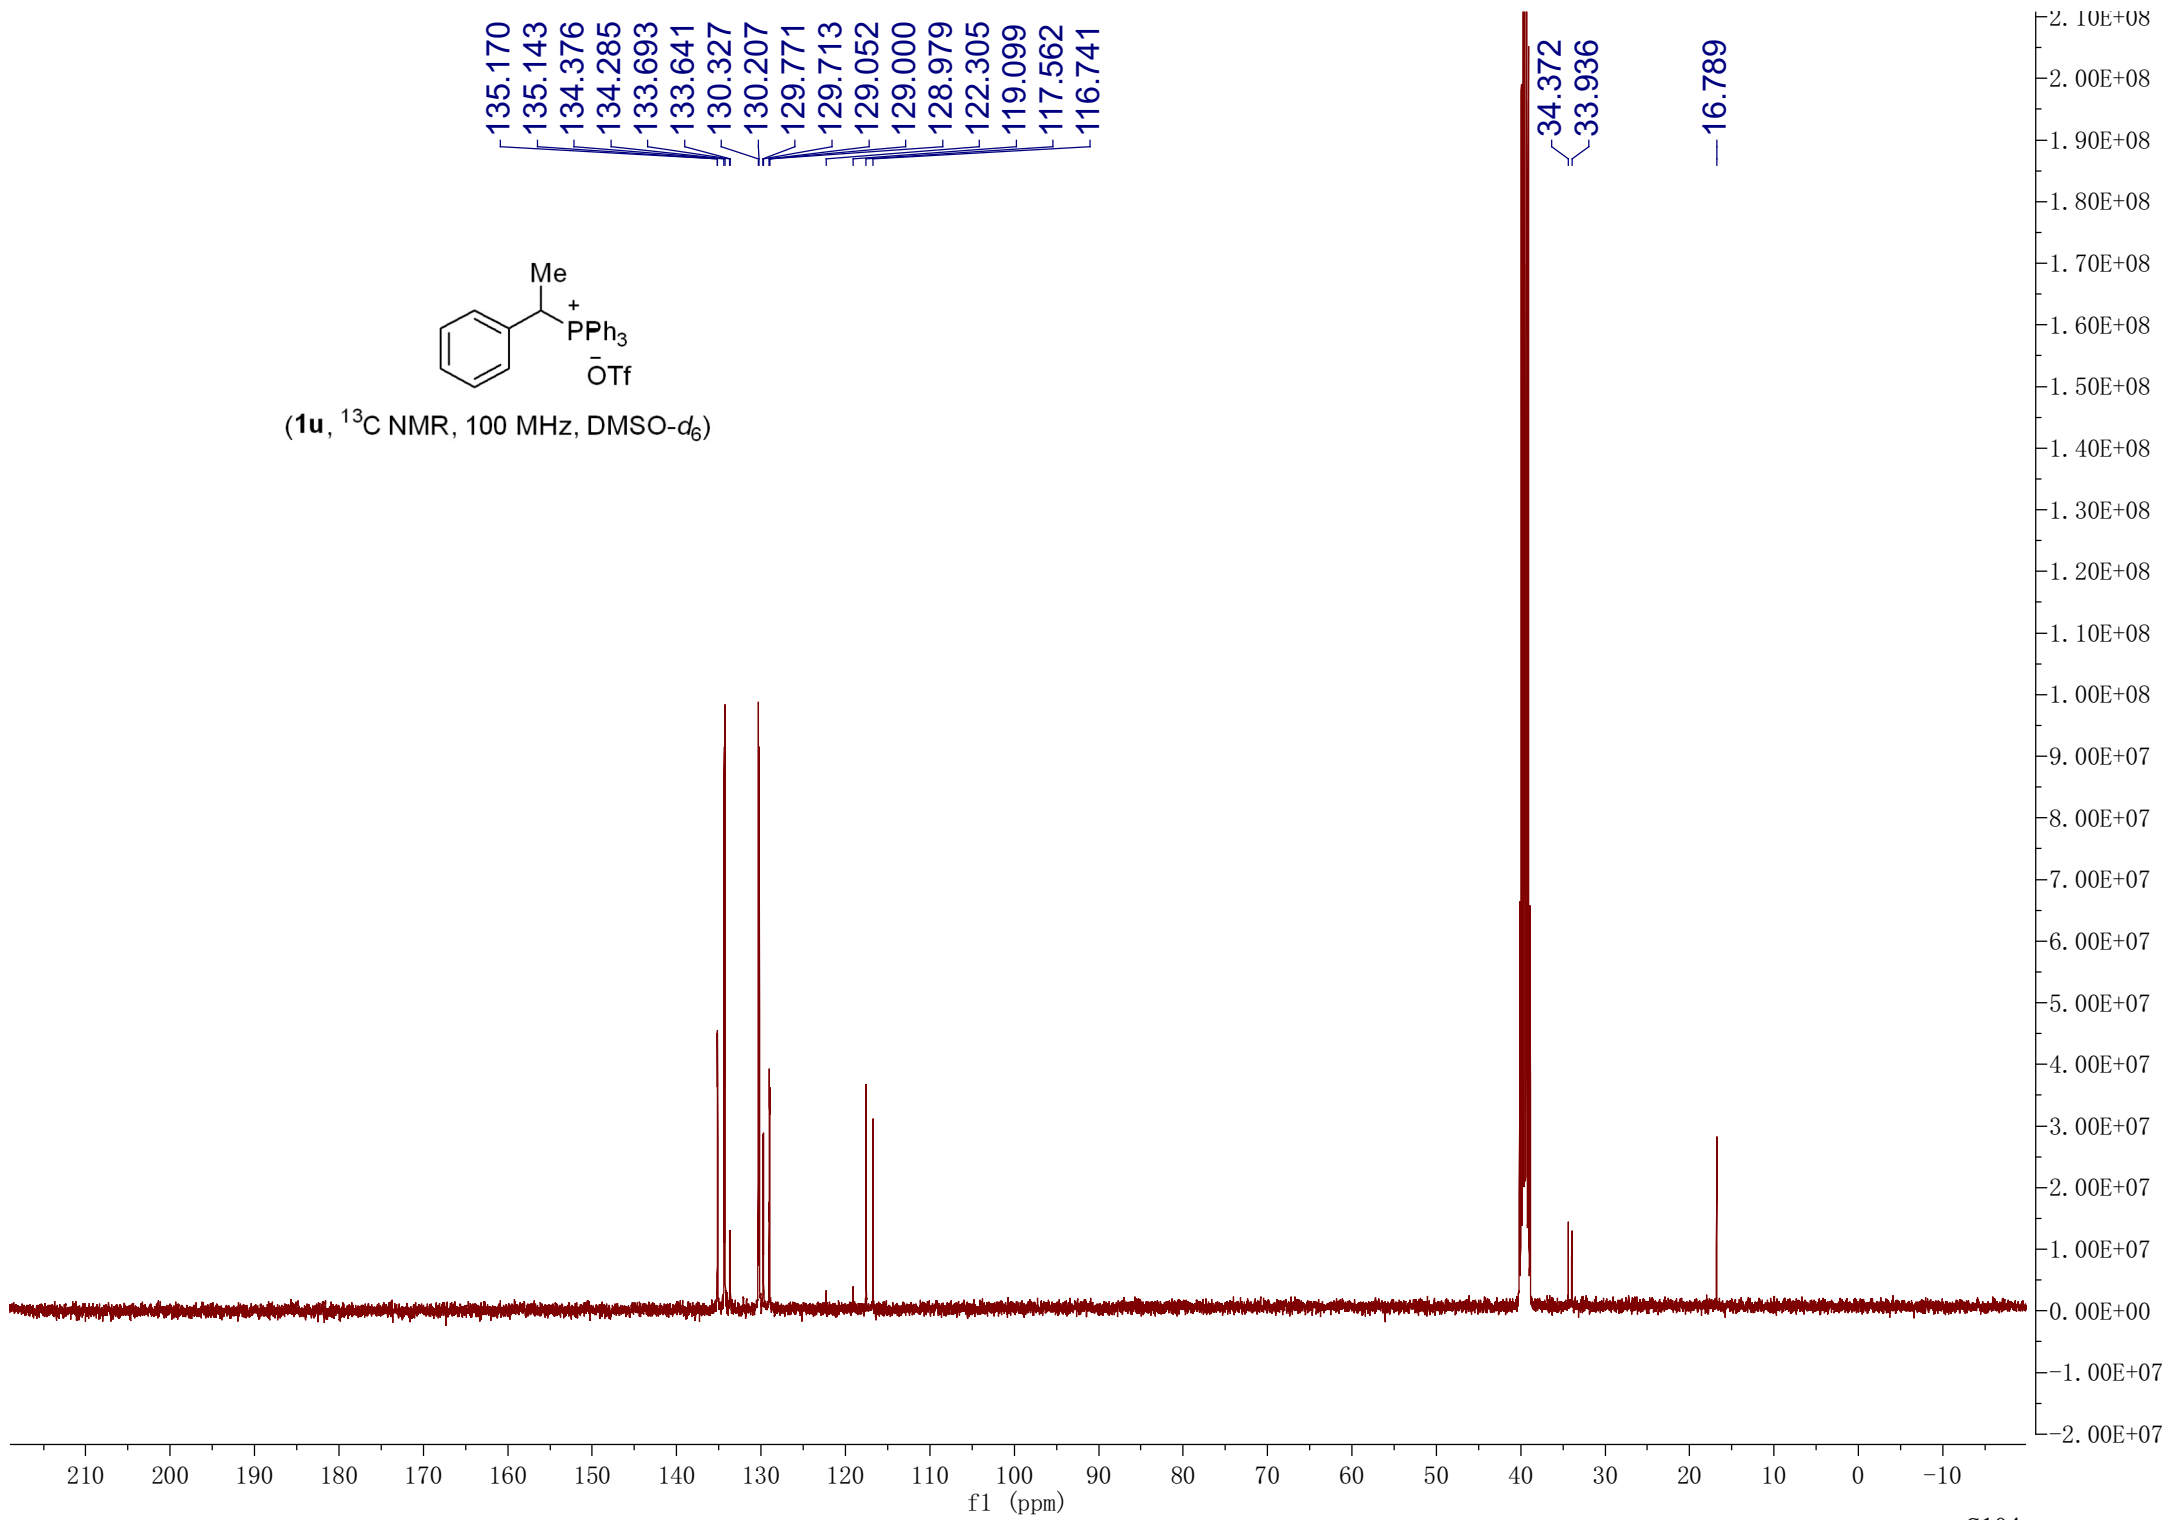



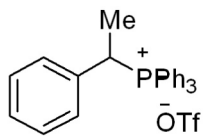

(1u, <sup>31</sup>P NMR, 162 MHz, DMSO-d<sub>6</sub>)

—26.252

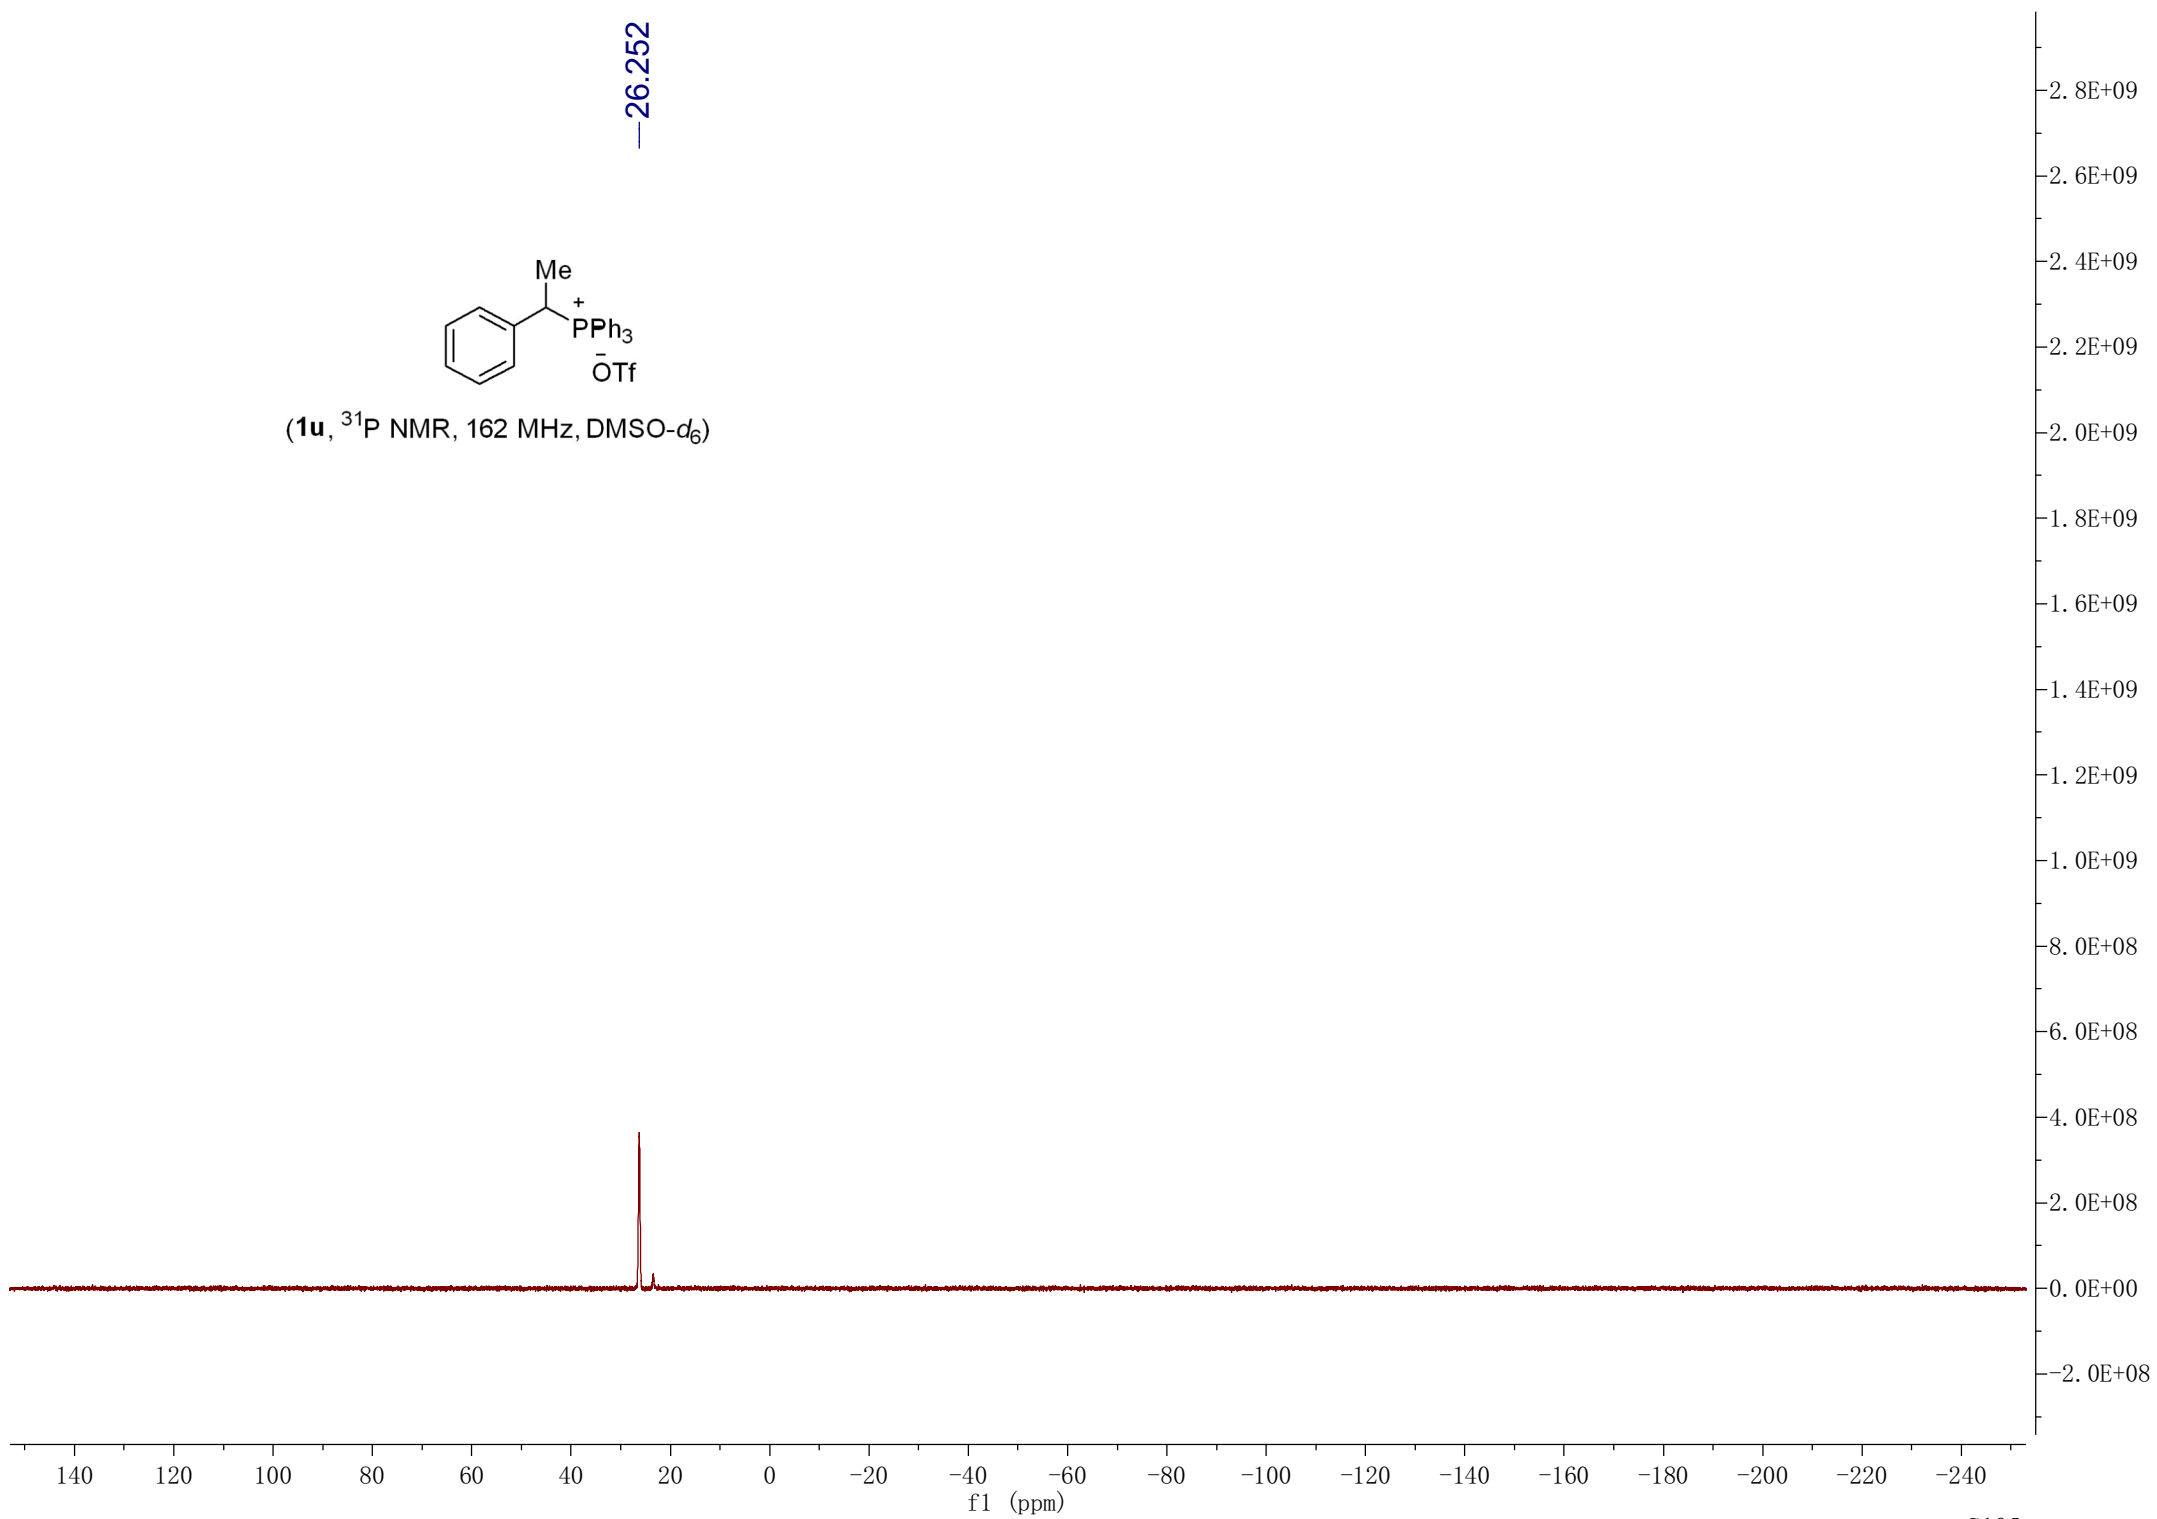

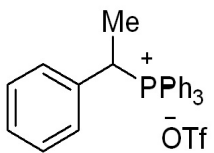

(1u, <sup>19</sup>F NMR, 376 MHz, DMSO-d<sub>6</sub>)

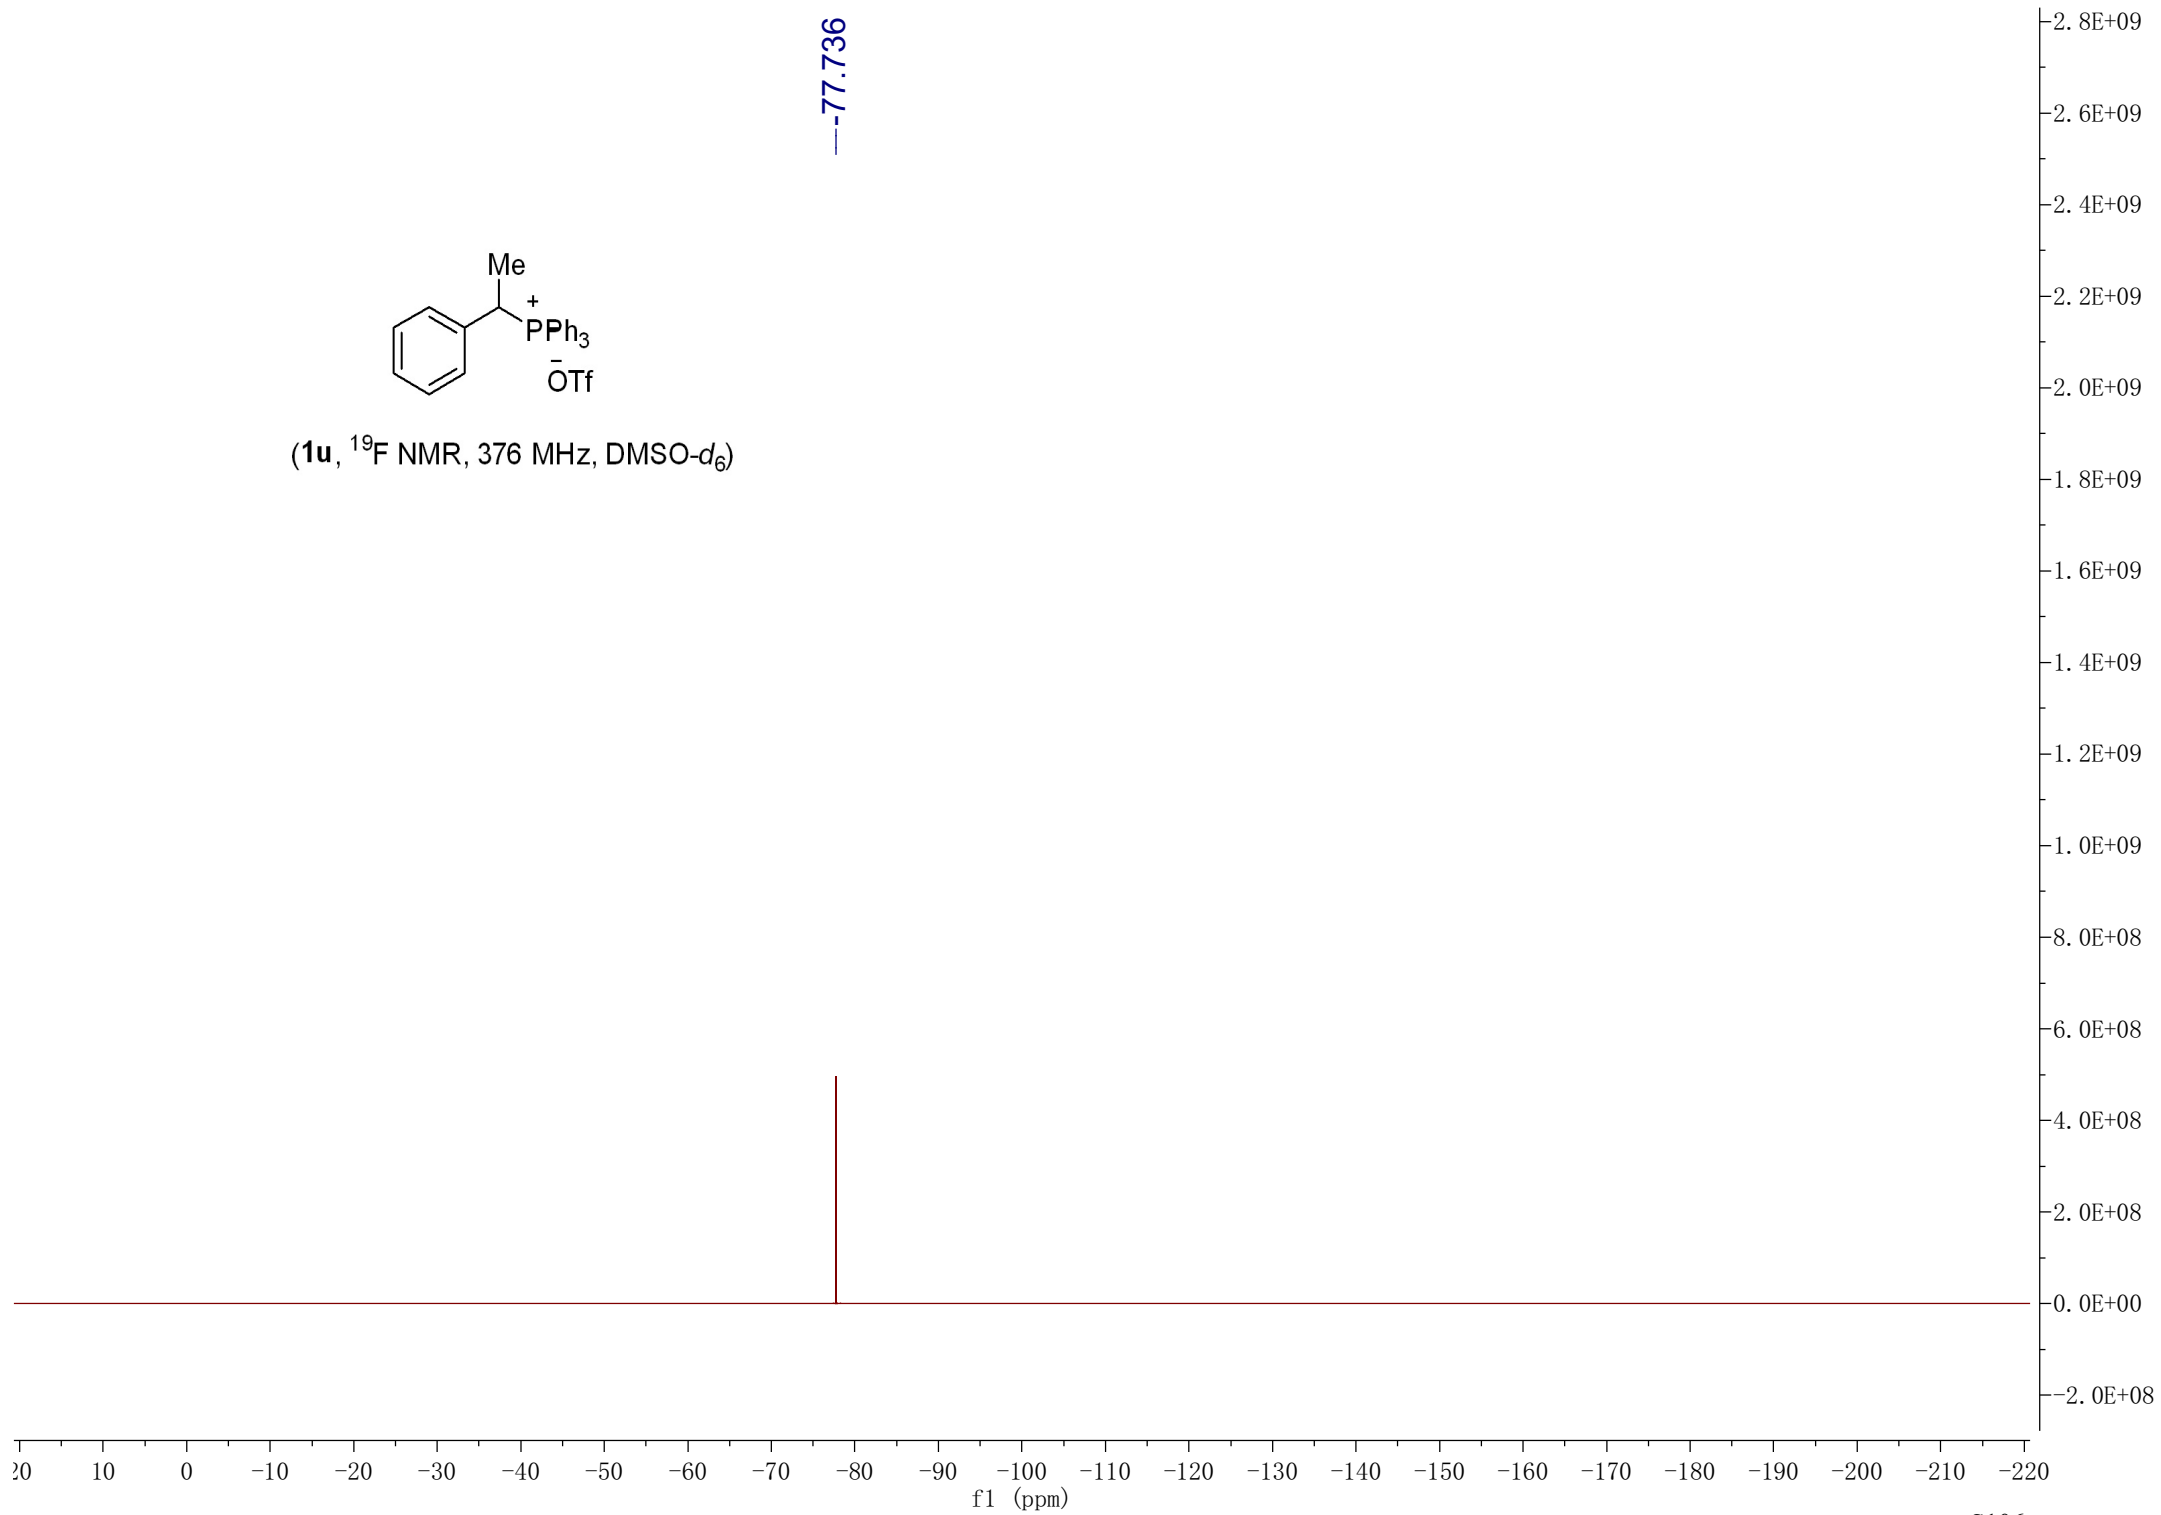

7.946  
7.927  
7.909  
7.793  
7.784  
7.773  
7.764  
7.755  
7.745  
7.728  
7.699  
7.680  
7.218  
7.199  
7.182  
6.877  
6.860  
6.580

5.613  
5.595  
5.577  
5.559  
5.540  
5.523

2.122  
1.761  
1.743  
1.714  
1.696

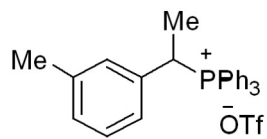

(1v,  $^1\text{H}$  NMR, 400 MHz,  $\text{DMSO-}d_6$ )

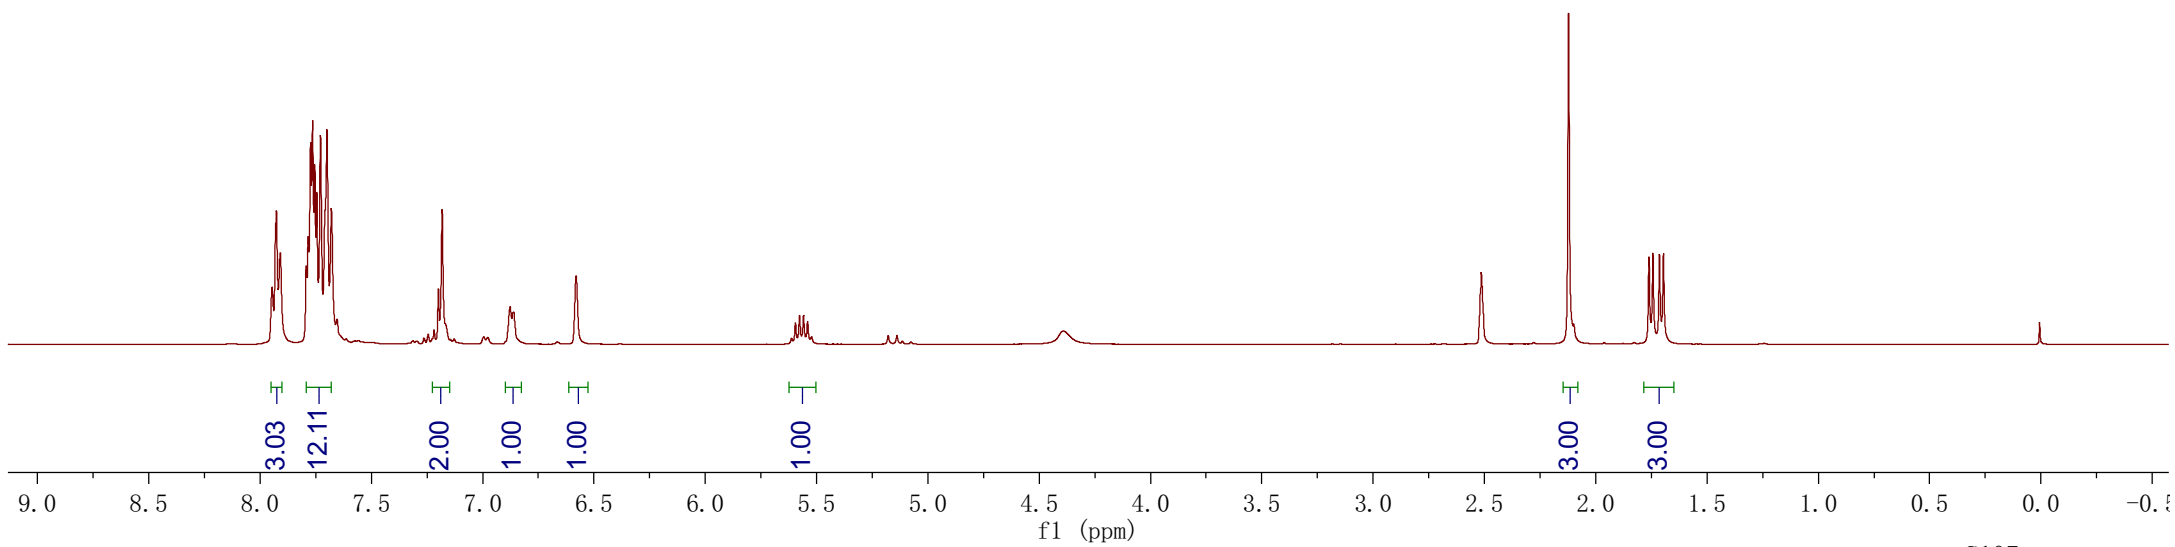

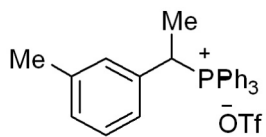

(1v,  $^{13}\text{C}$  NMR, 100 MHz, DMSO- $d_6$ )

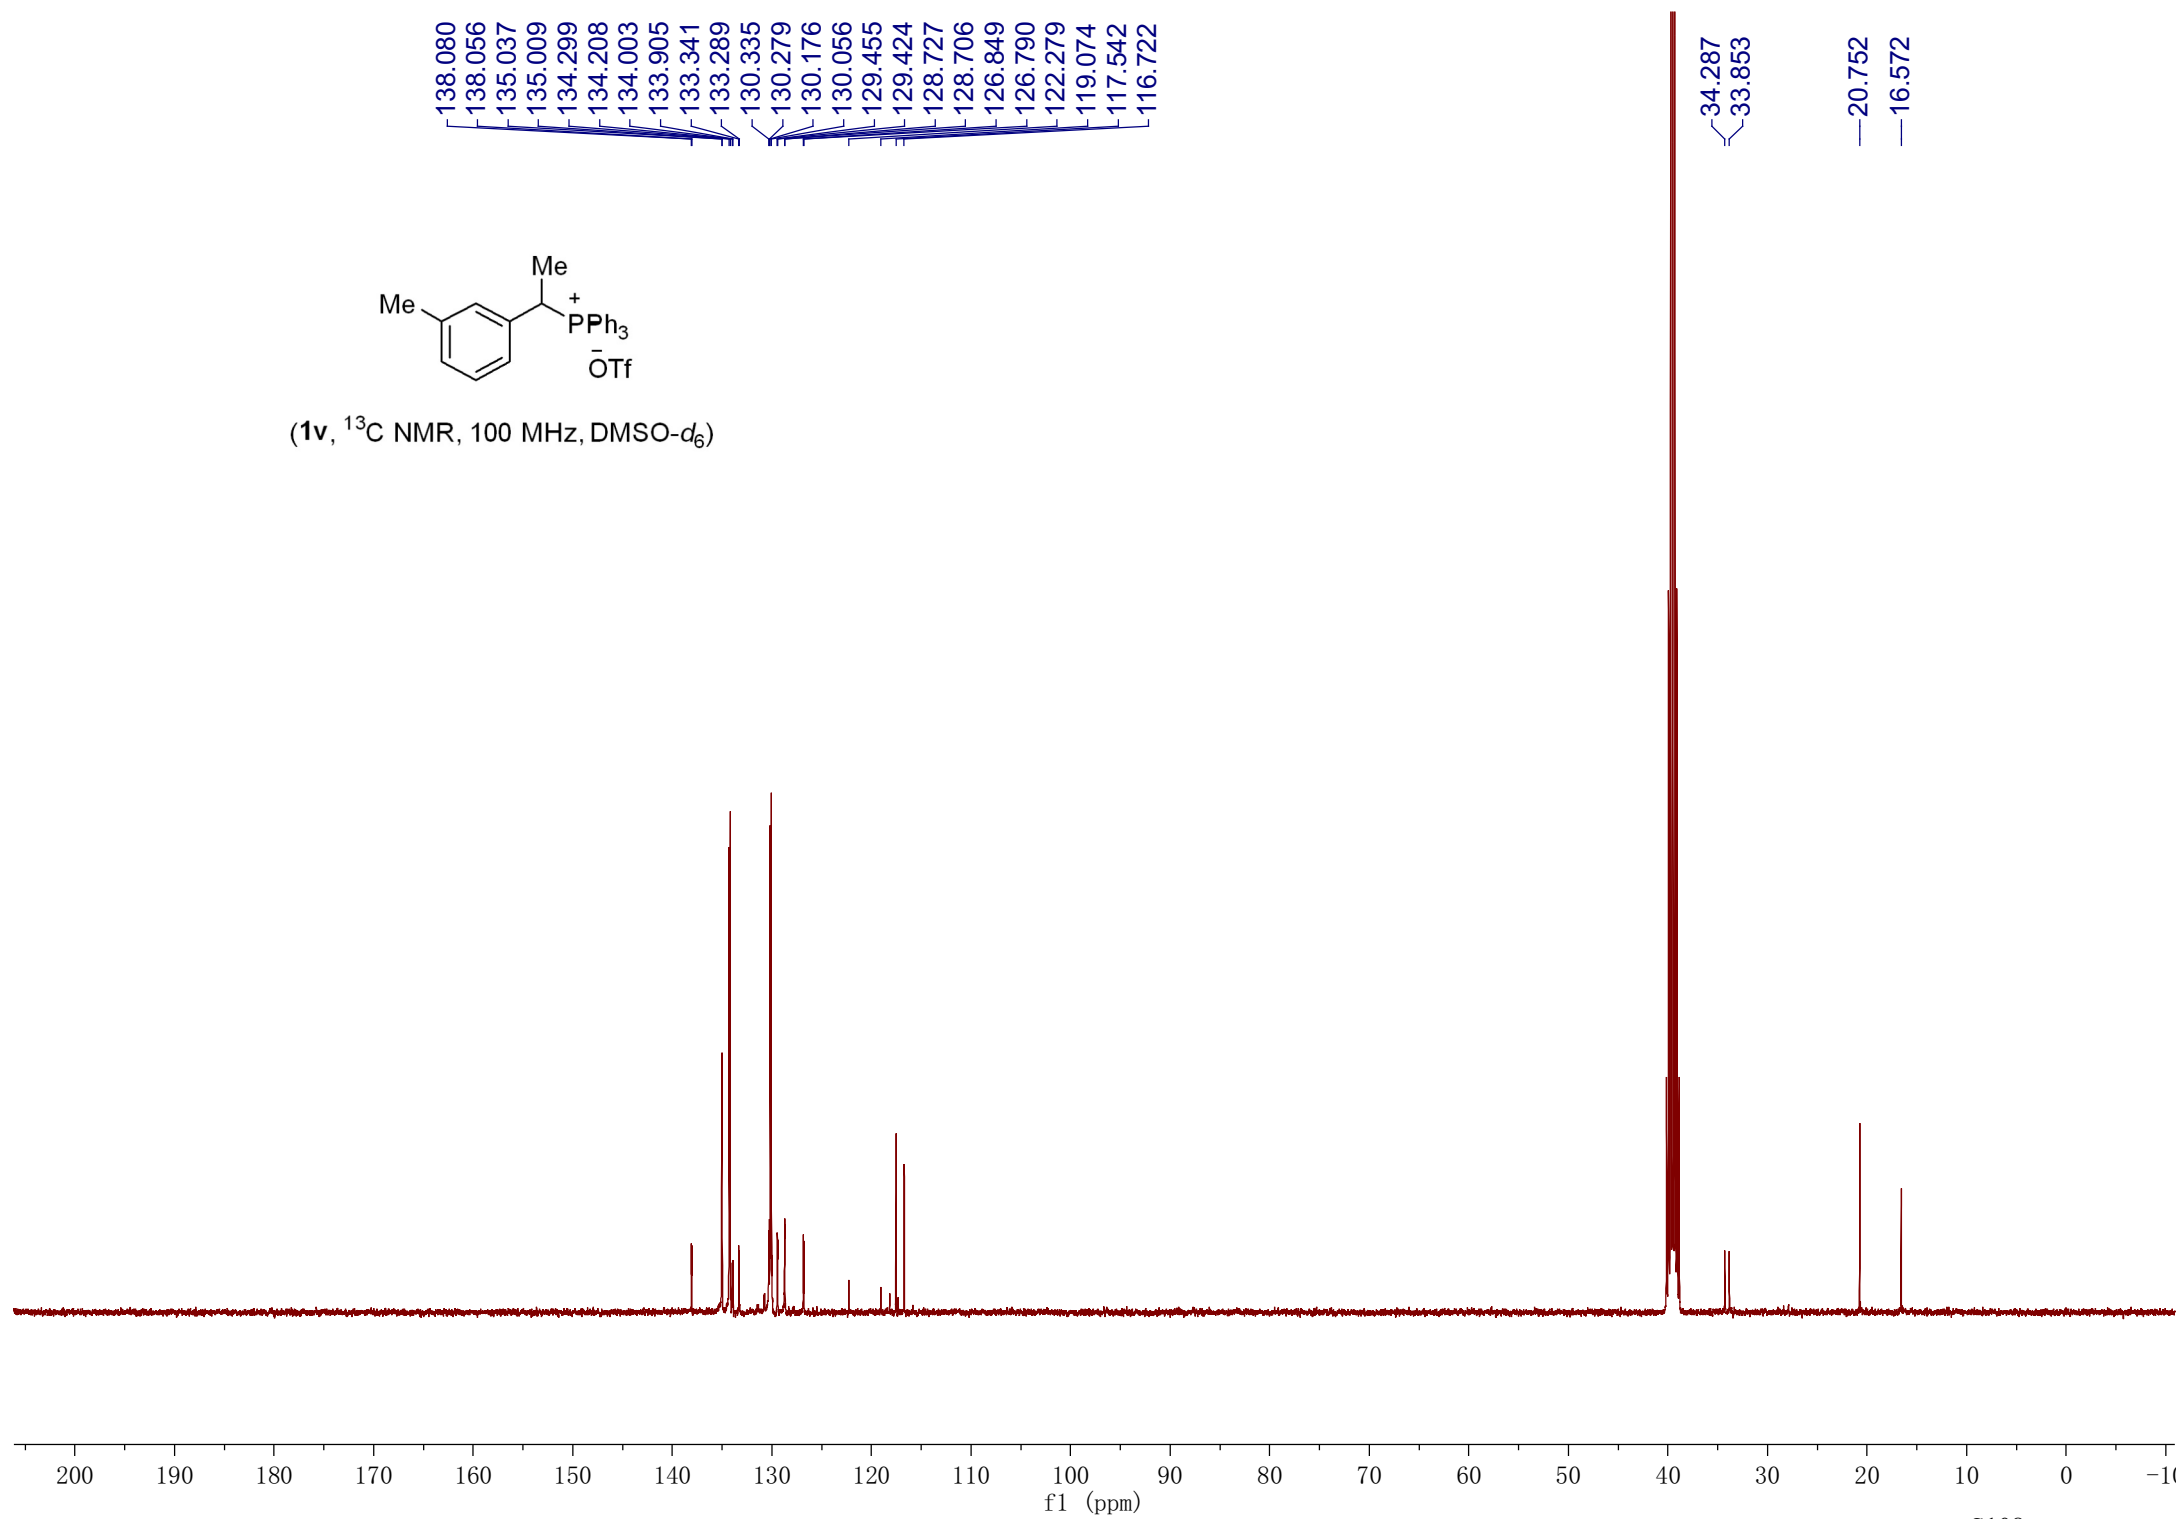

—26.280

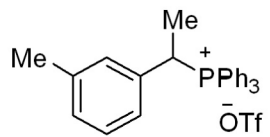

(1v, <sup>31</sup>P NMR, 162 MHz, DMSO-d<sub>6</sub>)

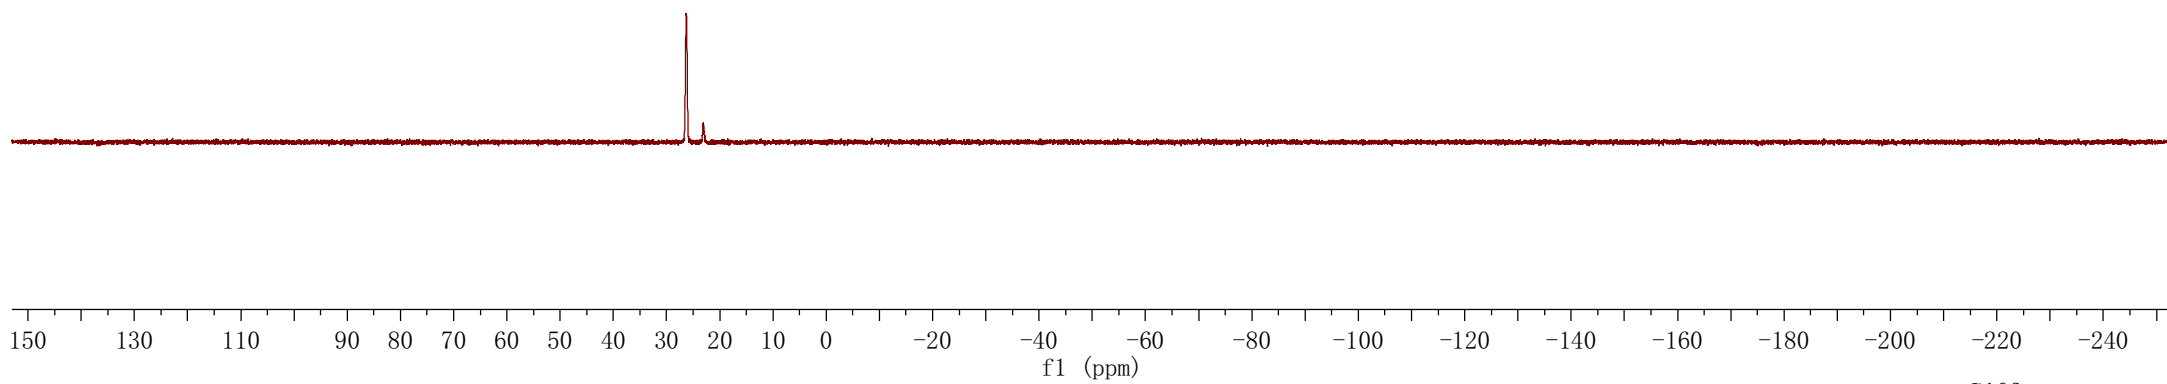

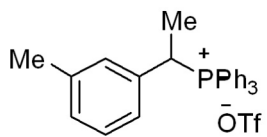

(1v,  $^{19}\text{F}$  NMR, 376 MHz,  $\text{DMSO-}d_6$ )

— -77.720

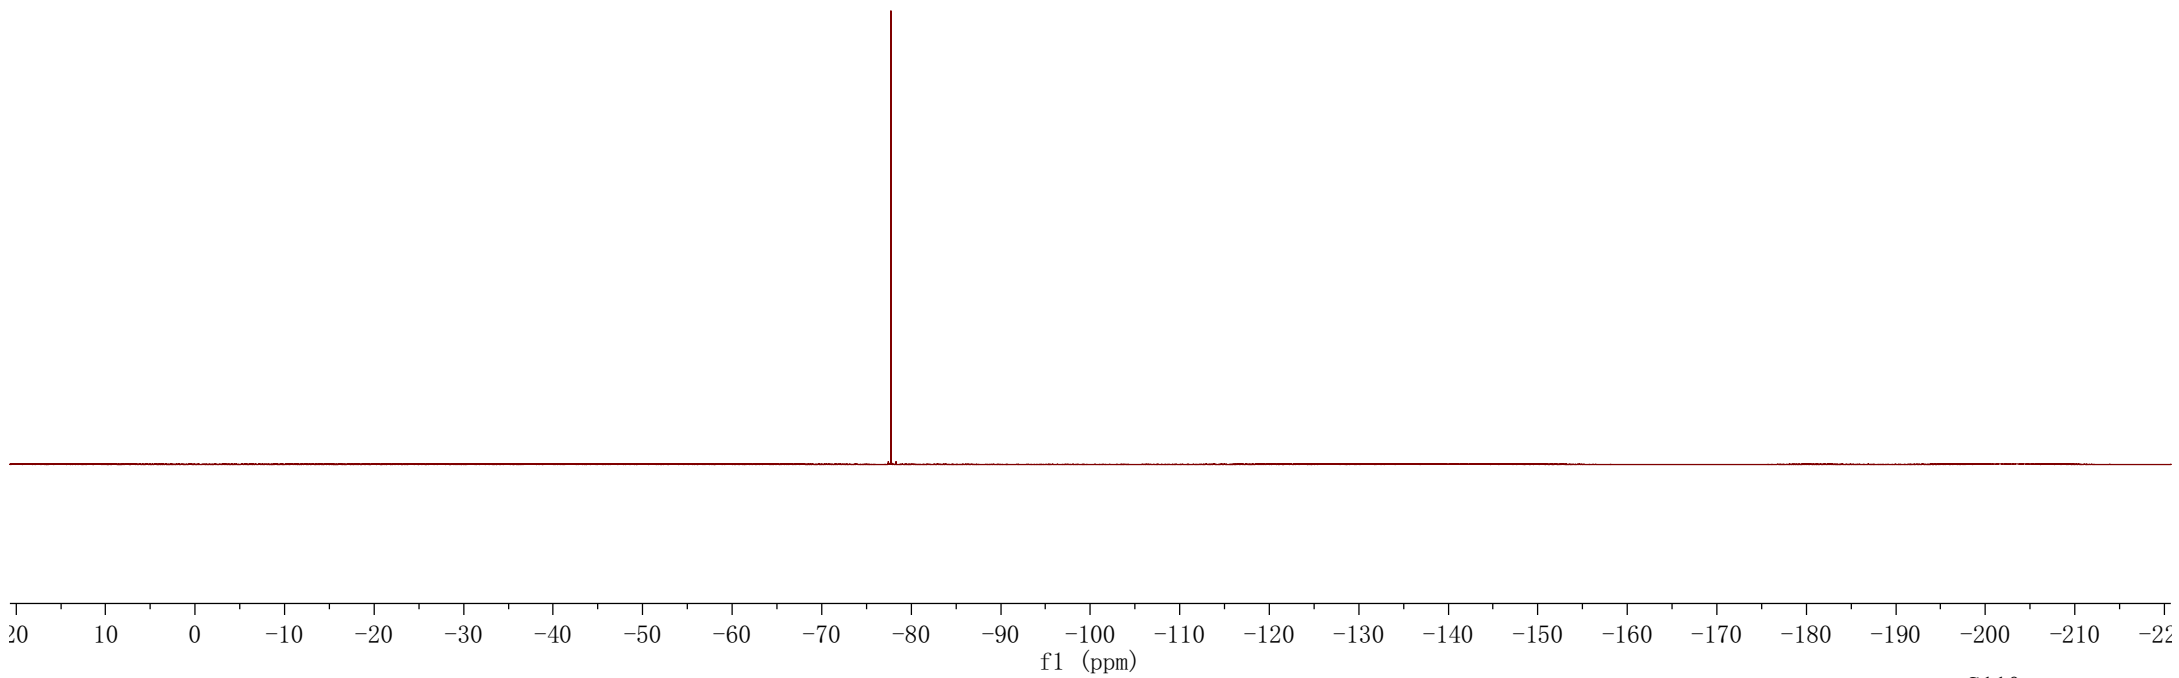

7.936  
7.917  
7.900  
7.771  
7.762  
7.751  
7.742  
7.732  
7.723  
7.695  
7.676  
7.673  
7.665  
7.647  
7.388  
7.367  
7.322  
7.179  
6.895  
6.876  
6.586  
6.582  
6.576  
5.599  
5.580  
5.562  
5.543  
5.525

1.739  
1.721  
1.692  
1.674

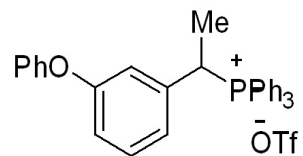

(**1w**, <sup>1</sup>H NMR, 400 MHz, DMSO-*d*<sub>6</sub>)

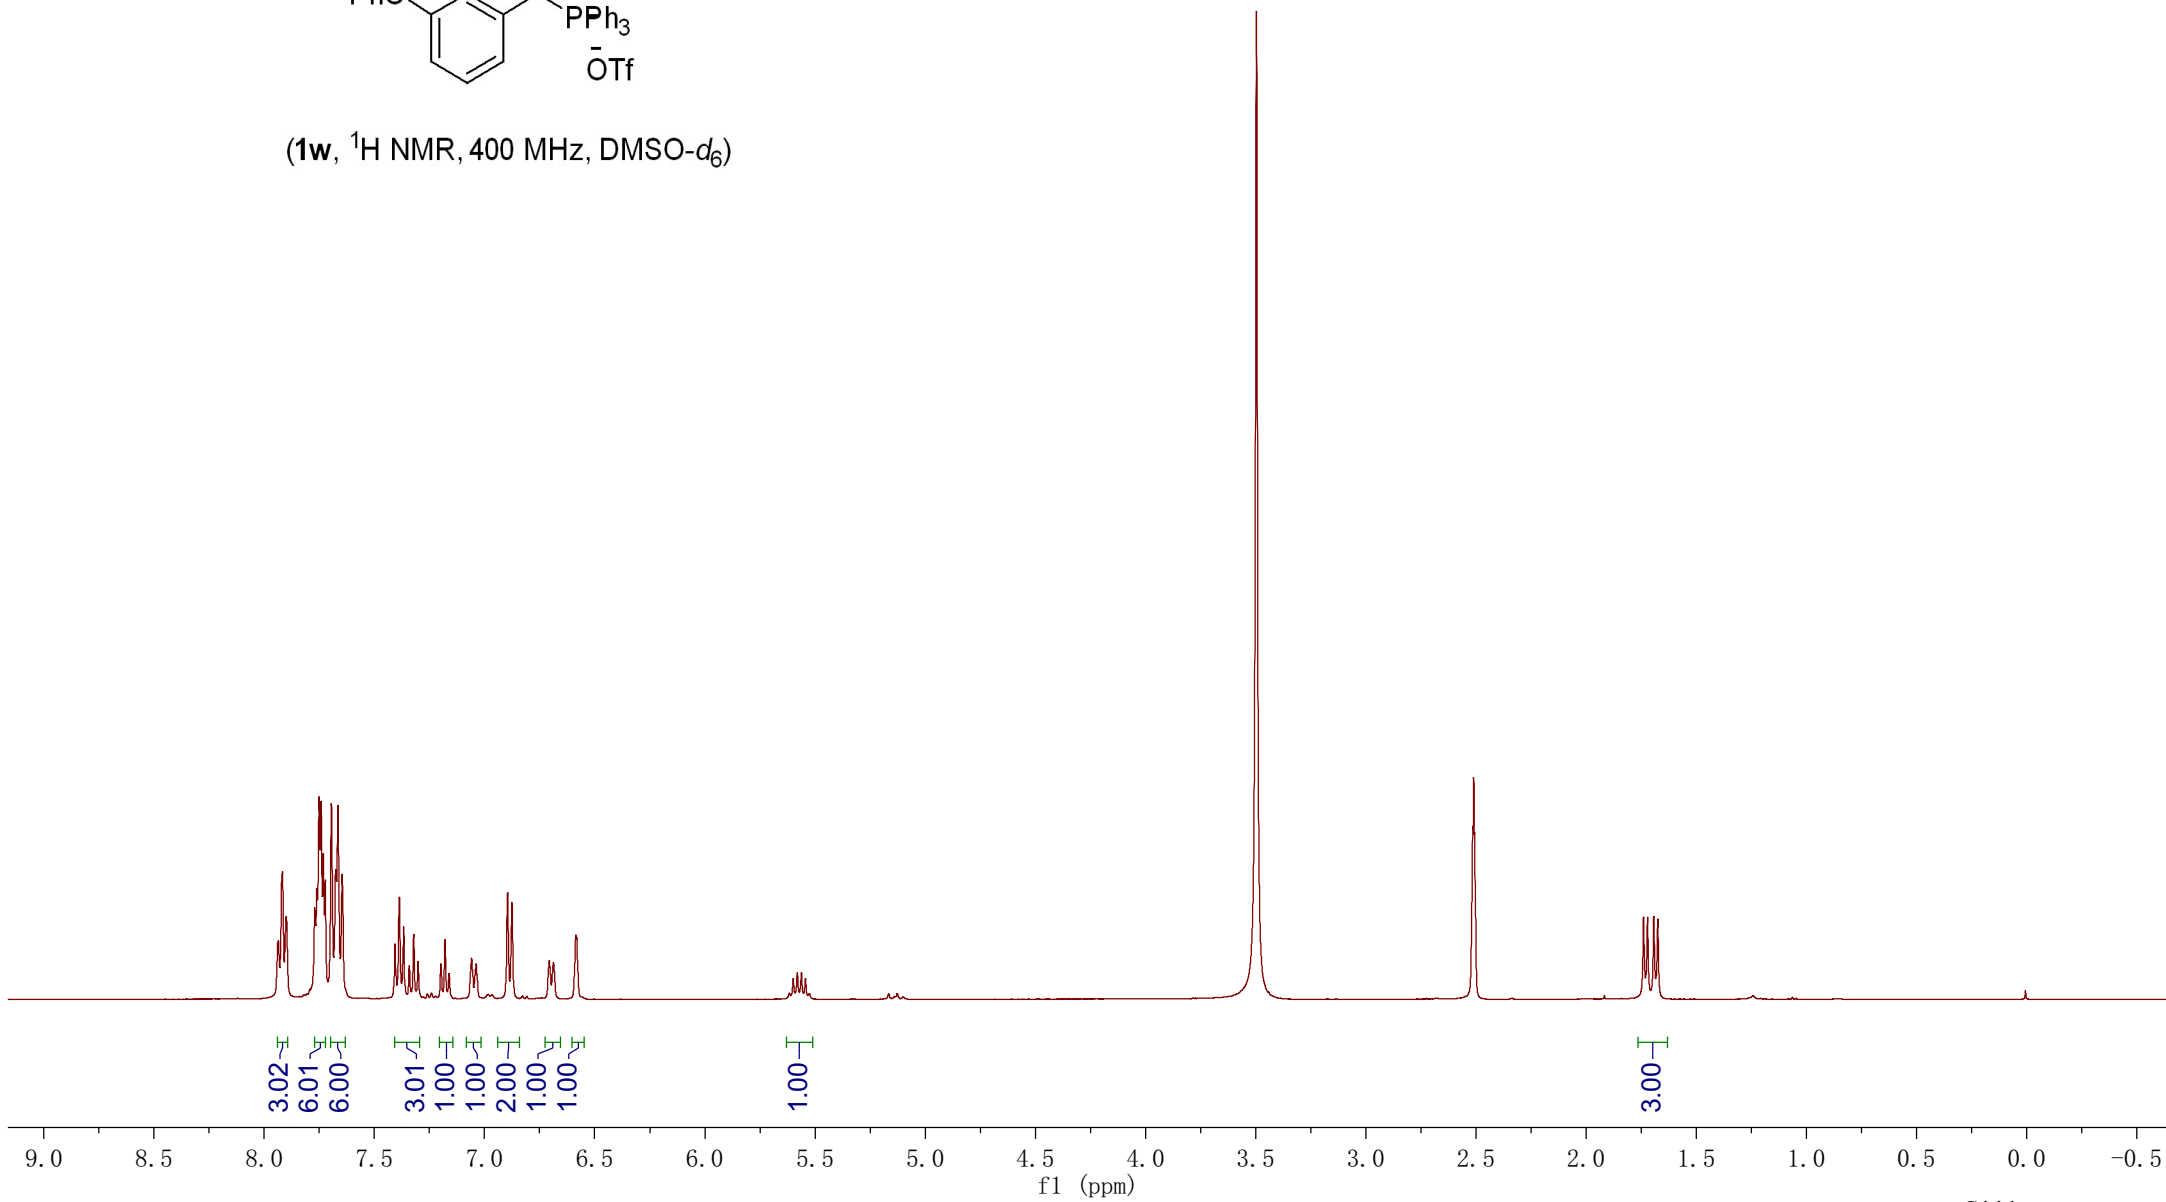

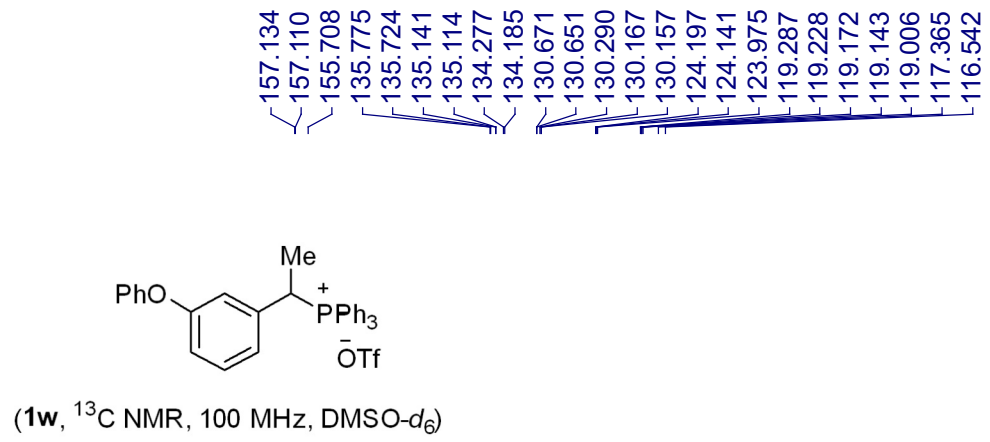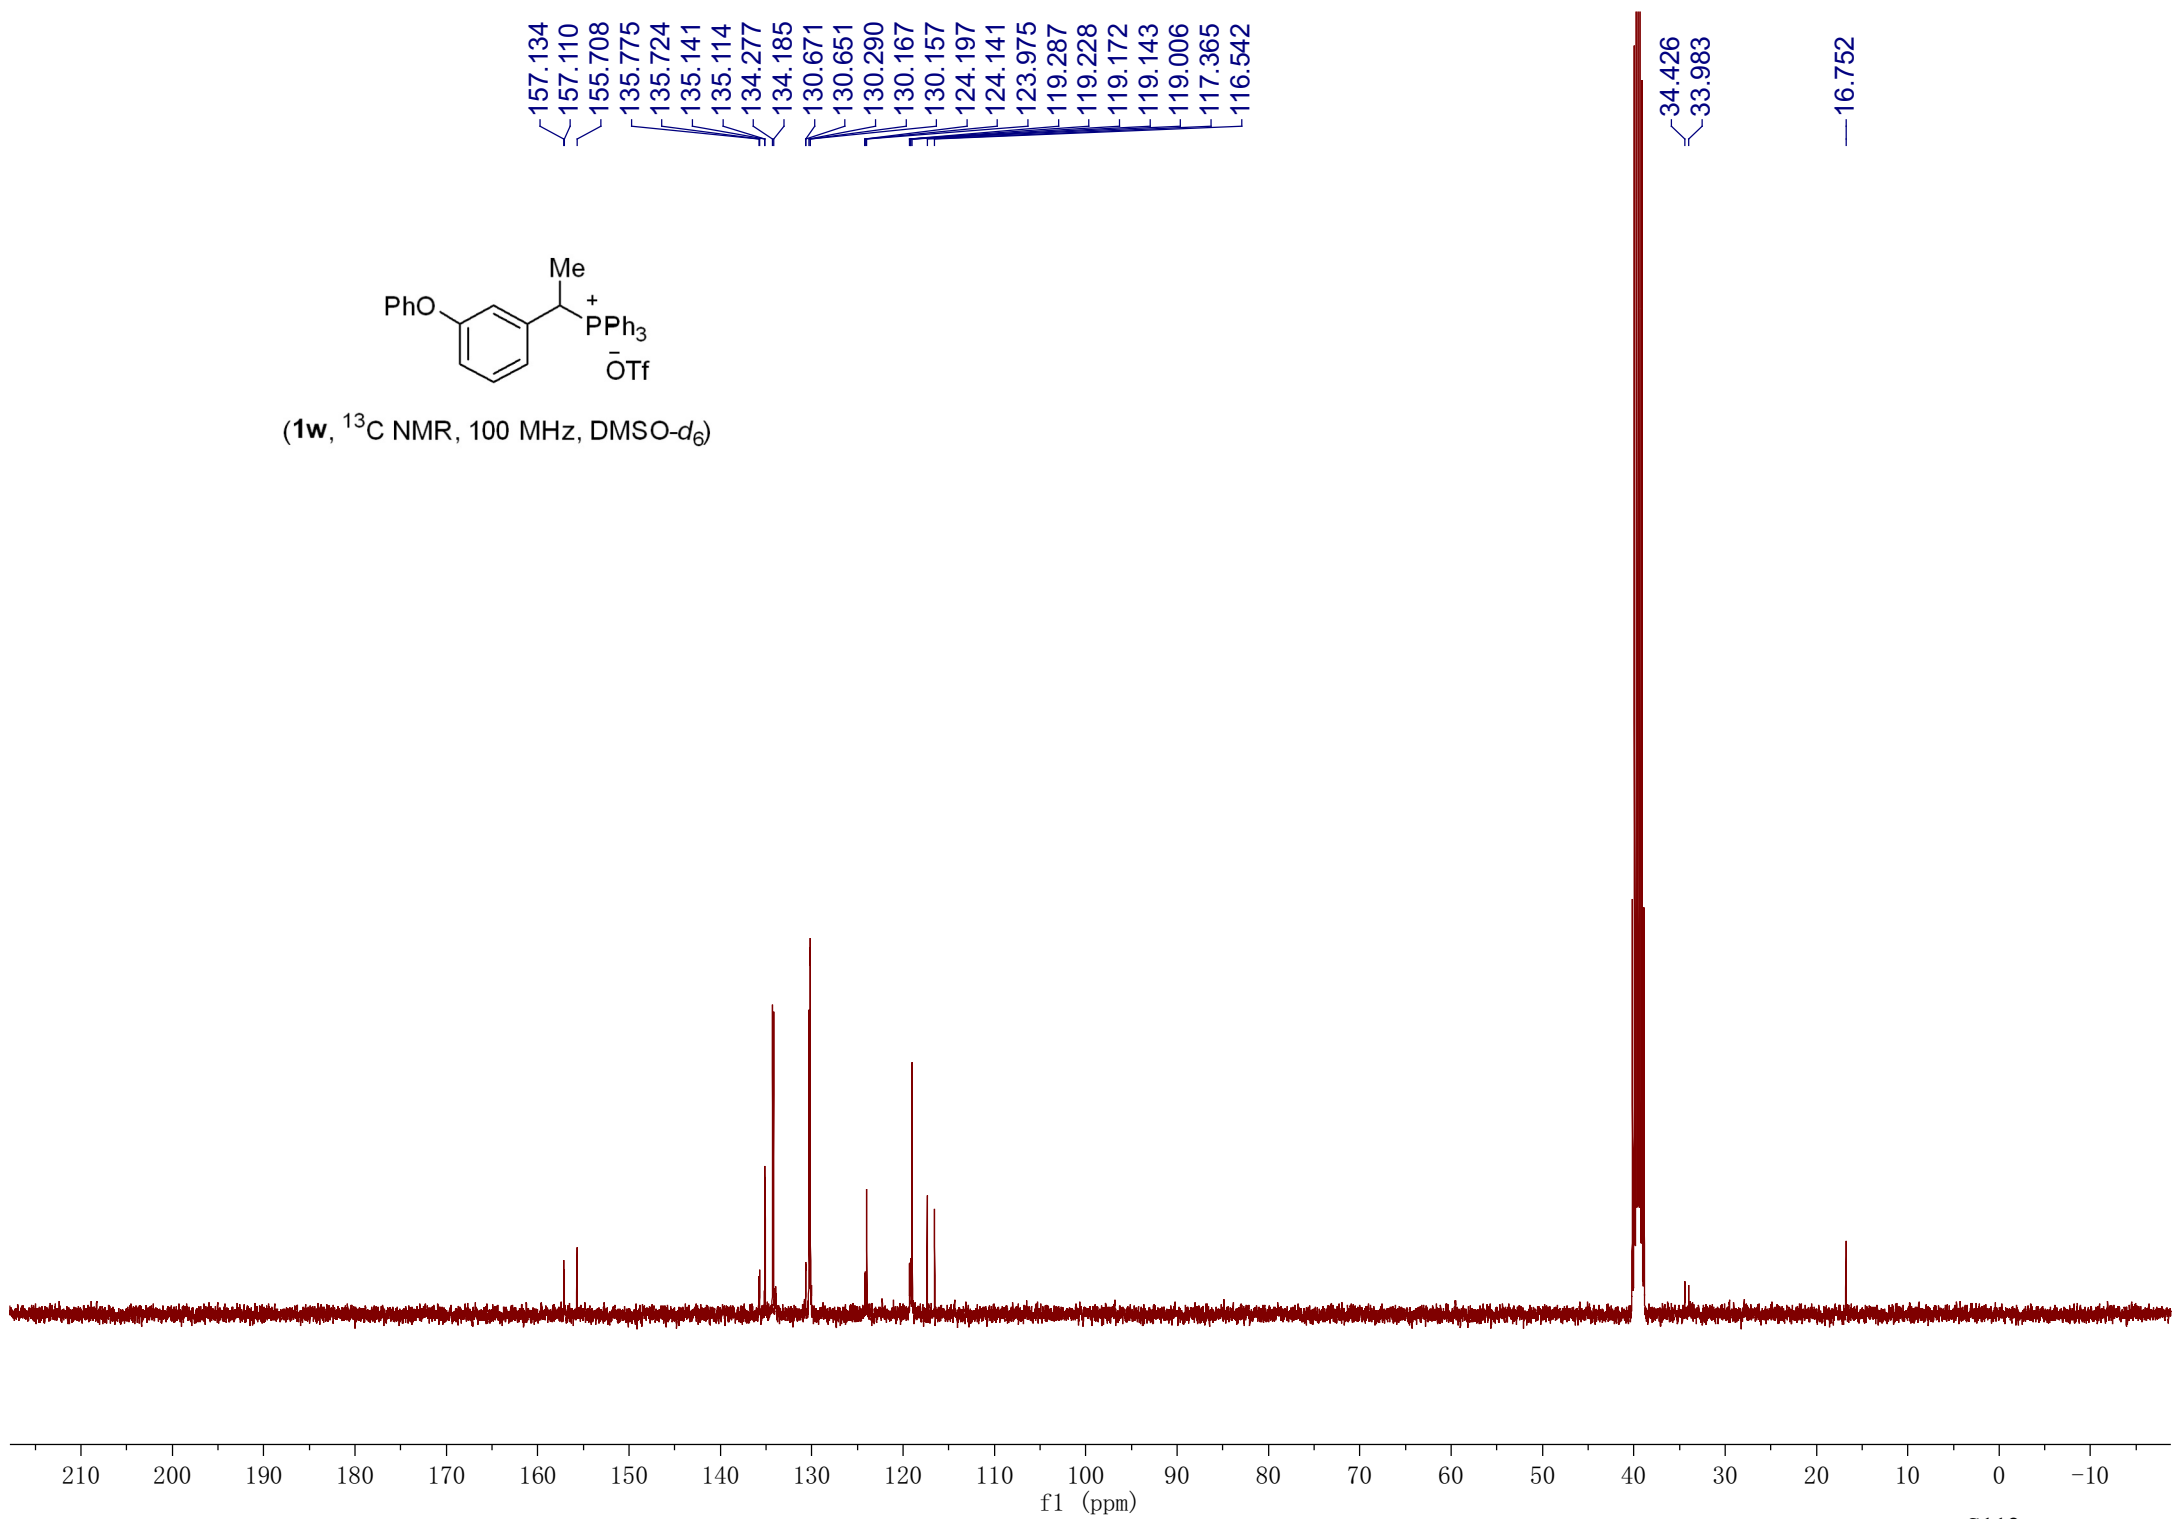



—26.216

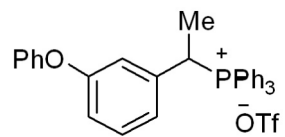

(**1w**, <sup>31</sup>P NMR, 162 MHz, DMSO-*d*<sub>6</sub>)

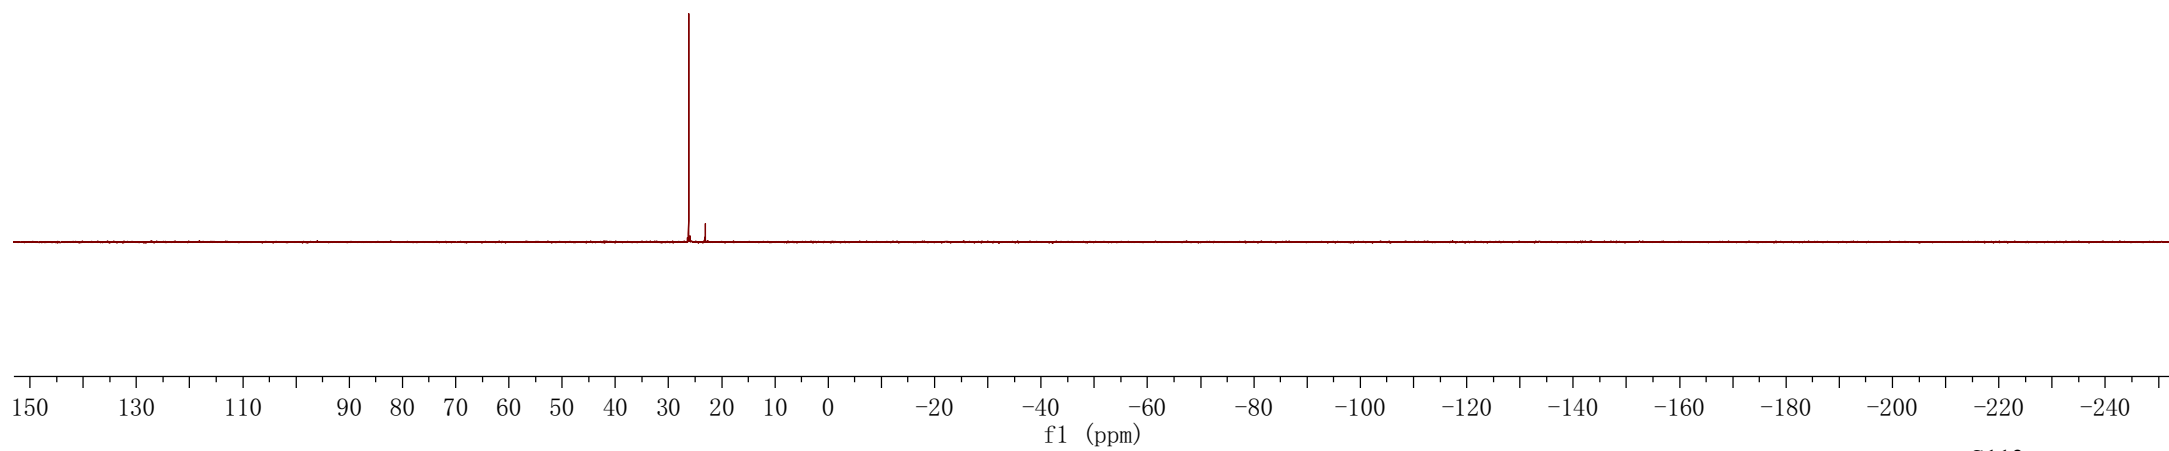

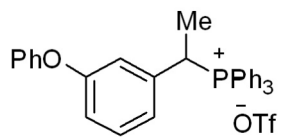

(**1w**,  $^{19}\text{F}$  NMR, 376 MHz,  $\text{DMSO-}d_6$ )

— -77.733

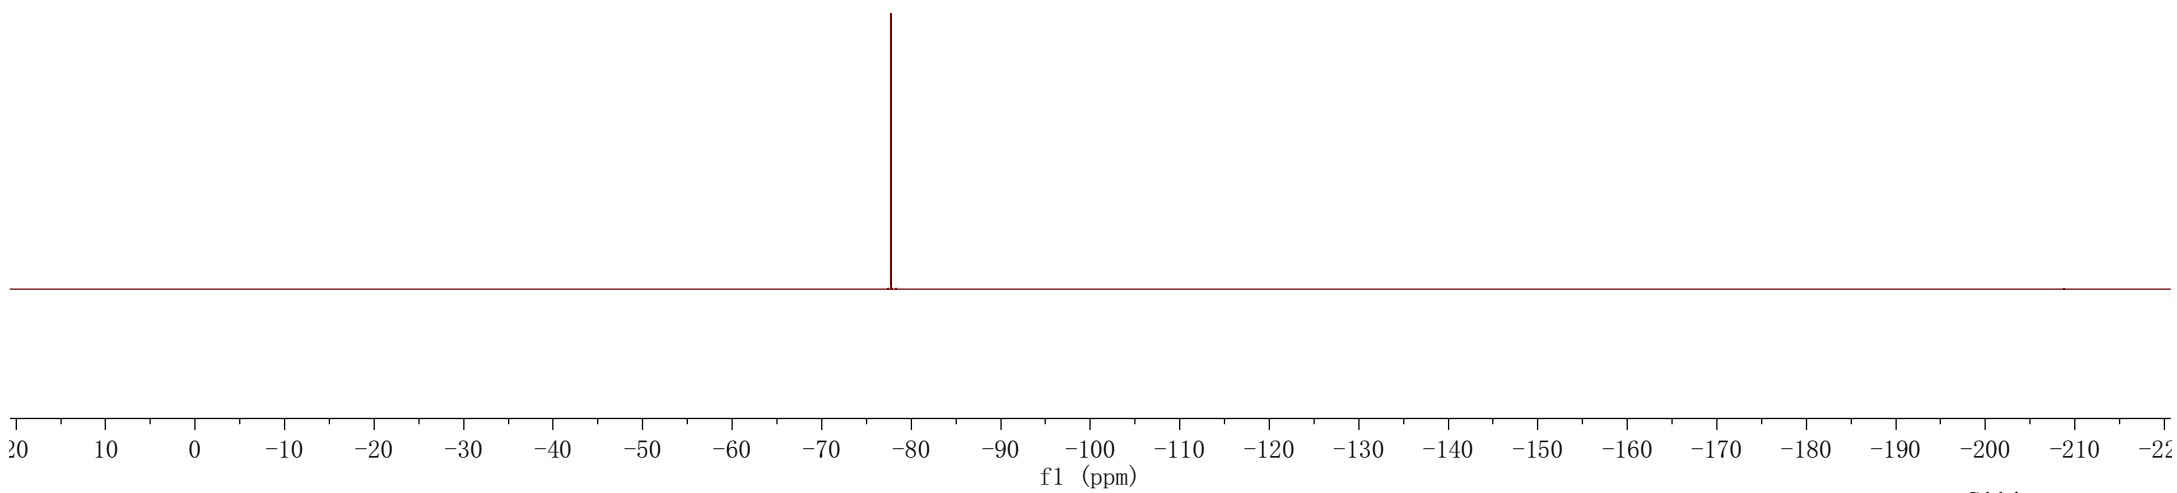

7.971  
7.953  
7.935  
7.767  
7.759  
7.747  
7.740  
7.729  
7.720  
7.518  
7.498  
7.488  
7.468  
7.316  
7.212  
6.657  
6.637

5.156  
5.139  
5.121  
5.103  
5.085  
5.068

1.886  
1.869  
1.840  
1.822  
1.808

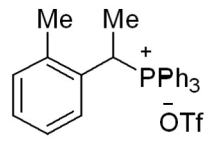

(1x, <sup>1</sup>H NMR, 400 MHz, DMSO-d<sub>6</sub>)

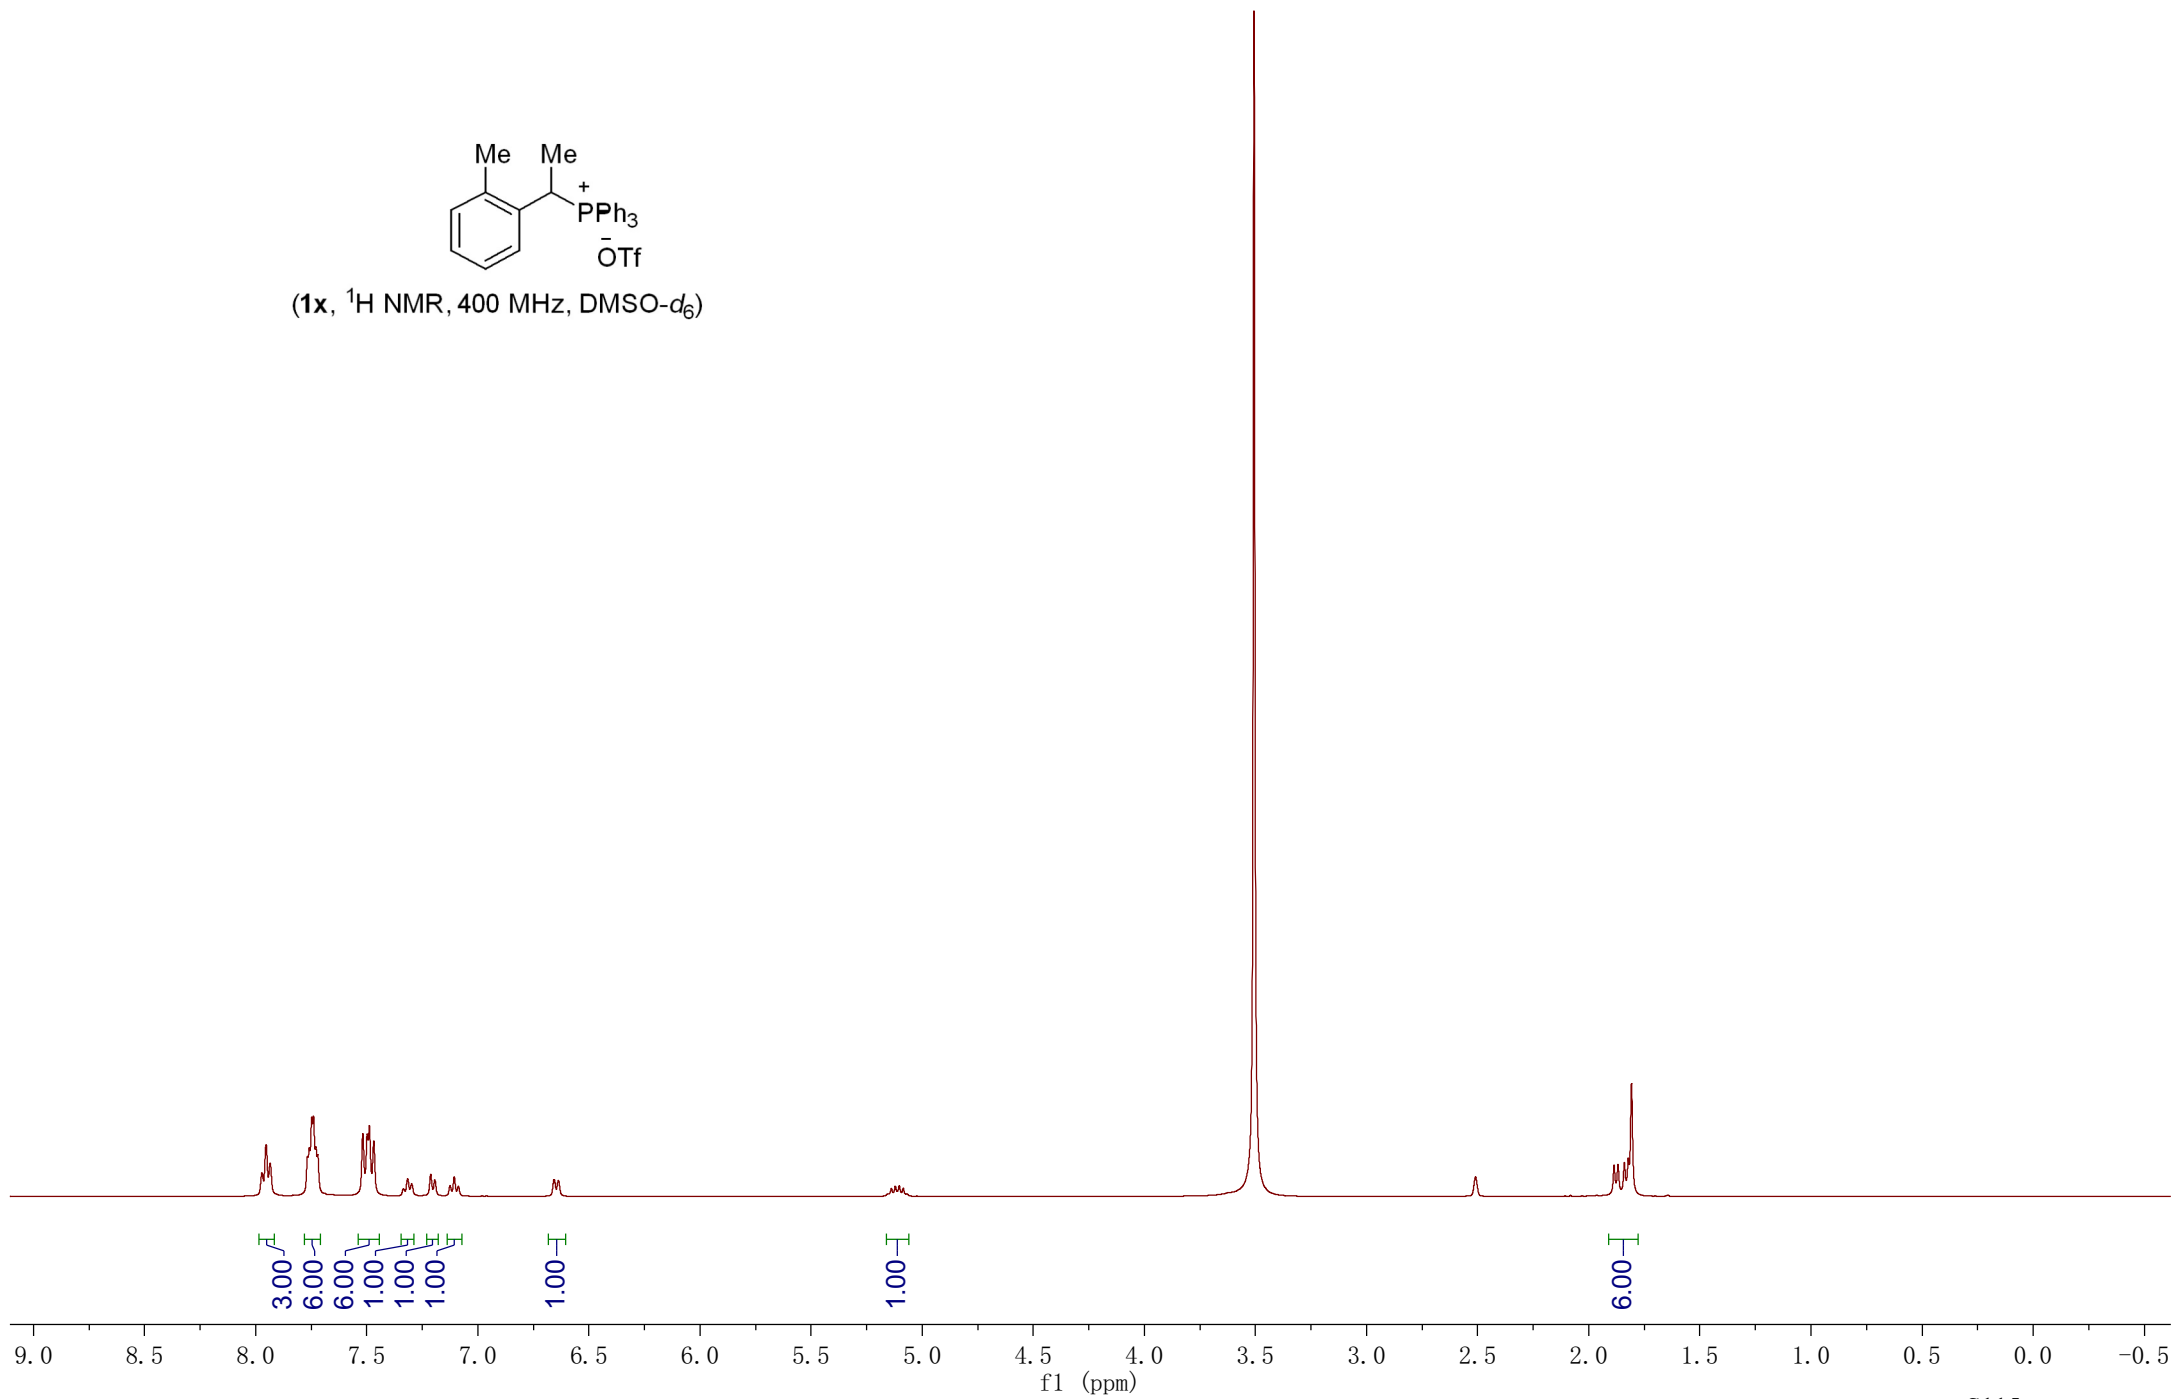

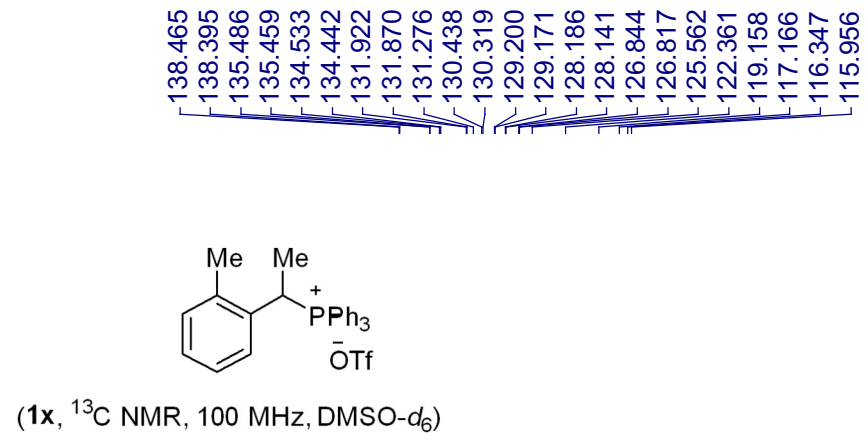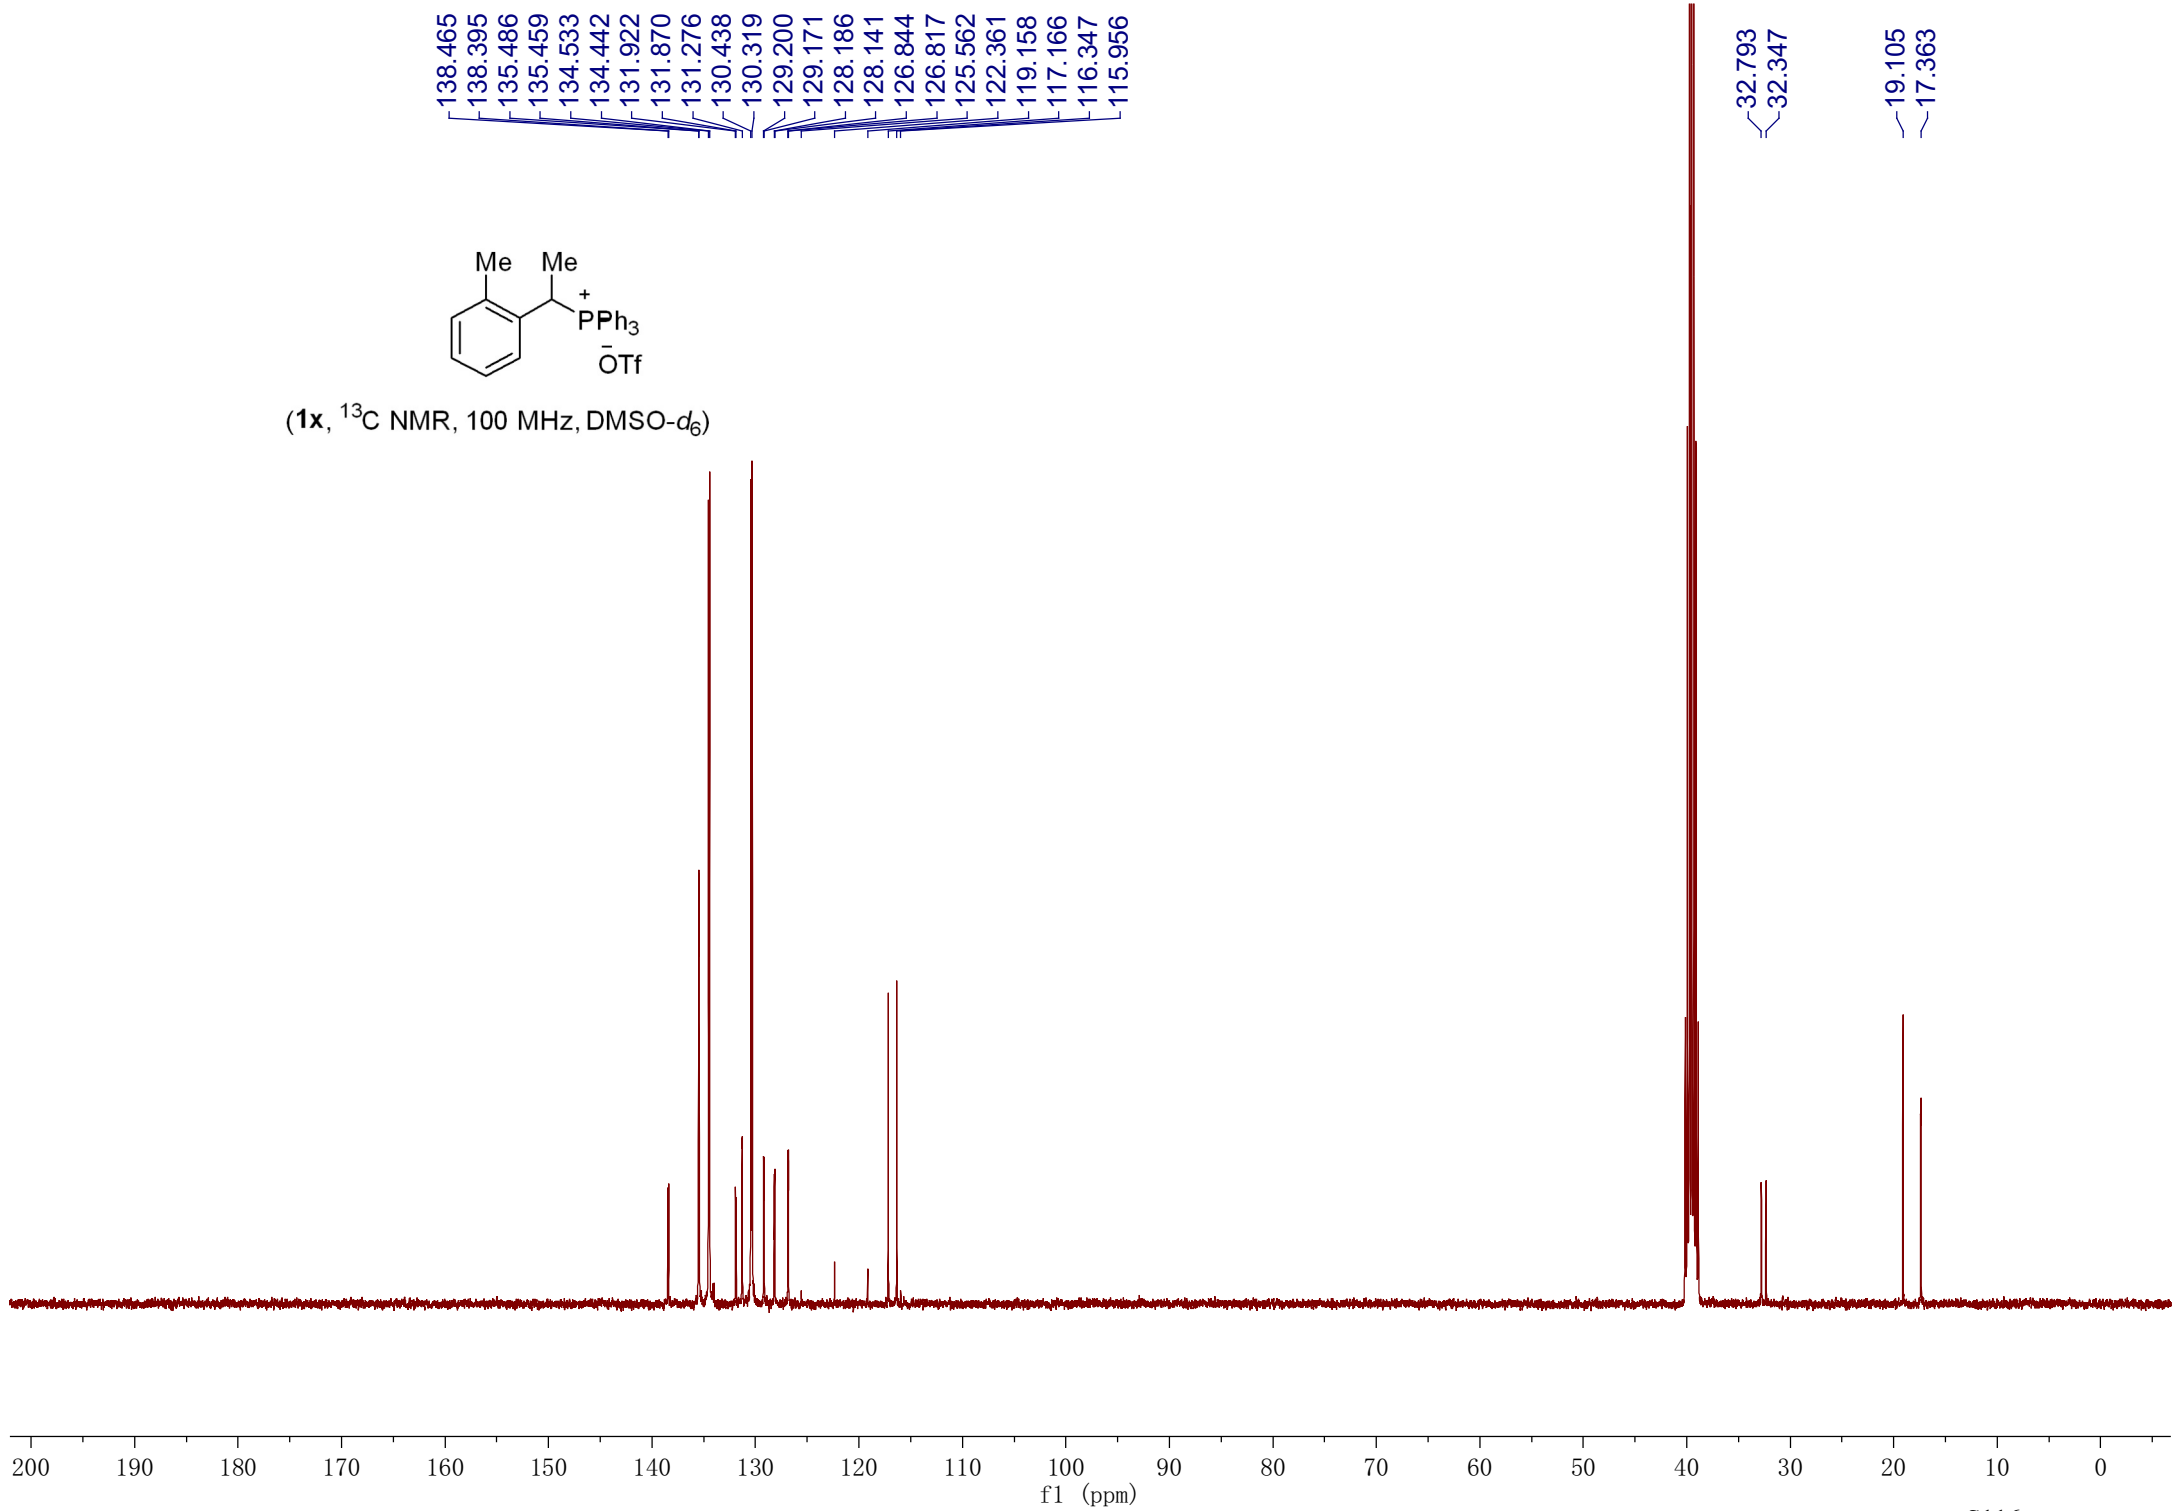

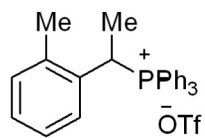

(1x,  $^{31}\text{P}$  NMR, 162 MHz,  $\text{DMSO-}d_6$ )

—24.871

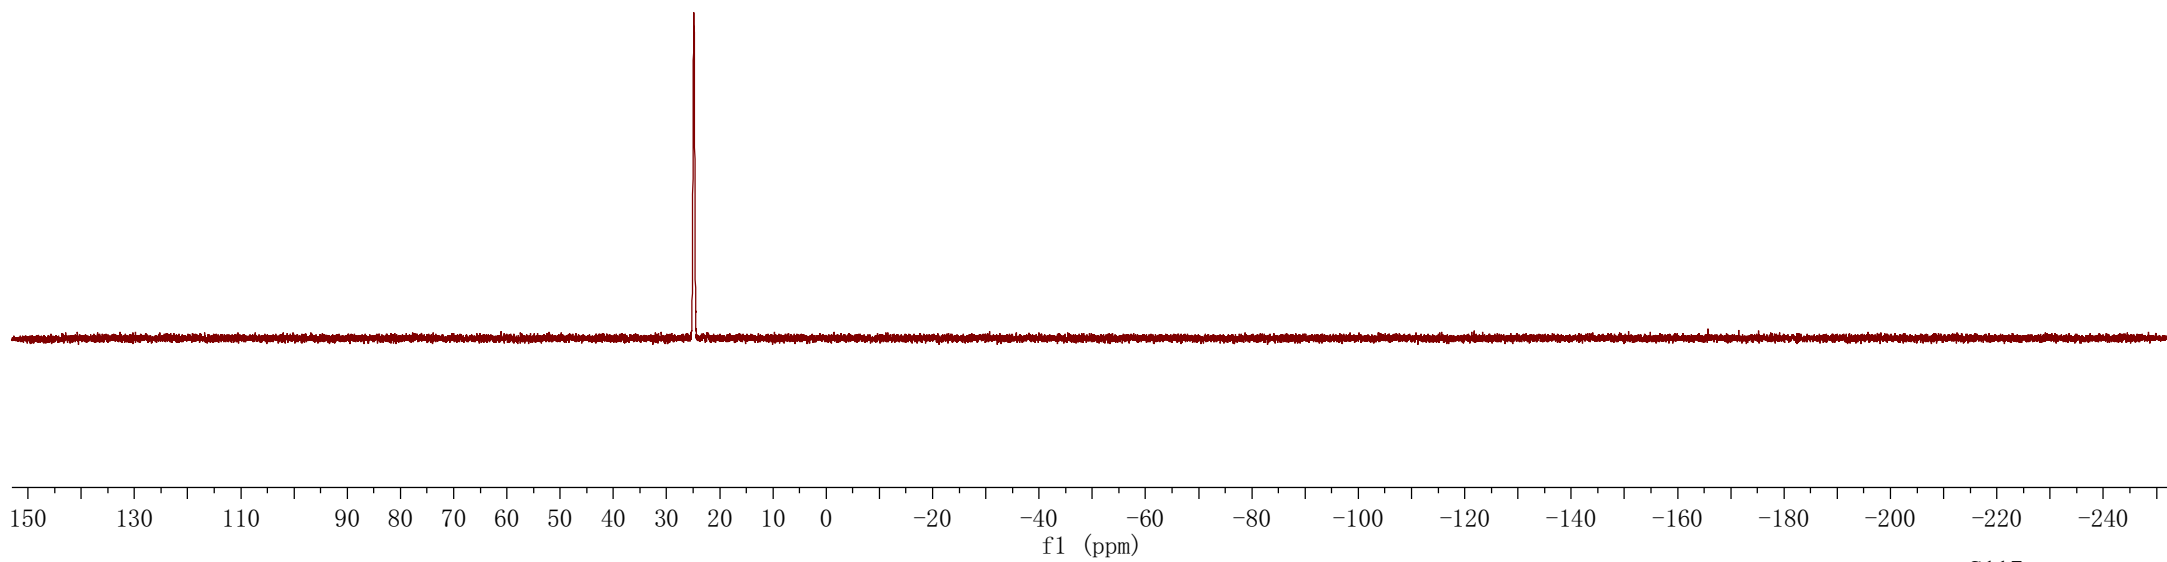

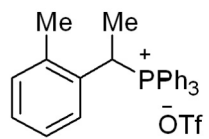

(1x,  $^{19}\text{F}$  NMR, 376 MHz, DMSO- $d_6$ )

— -77.740

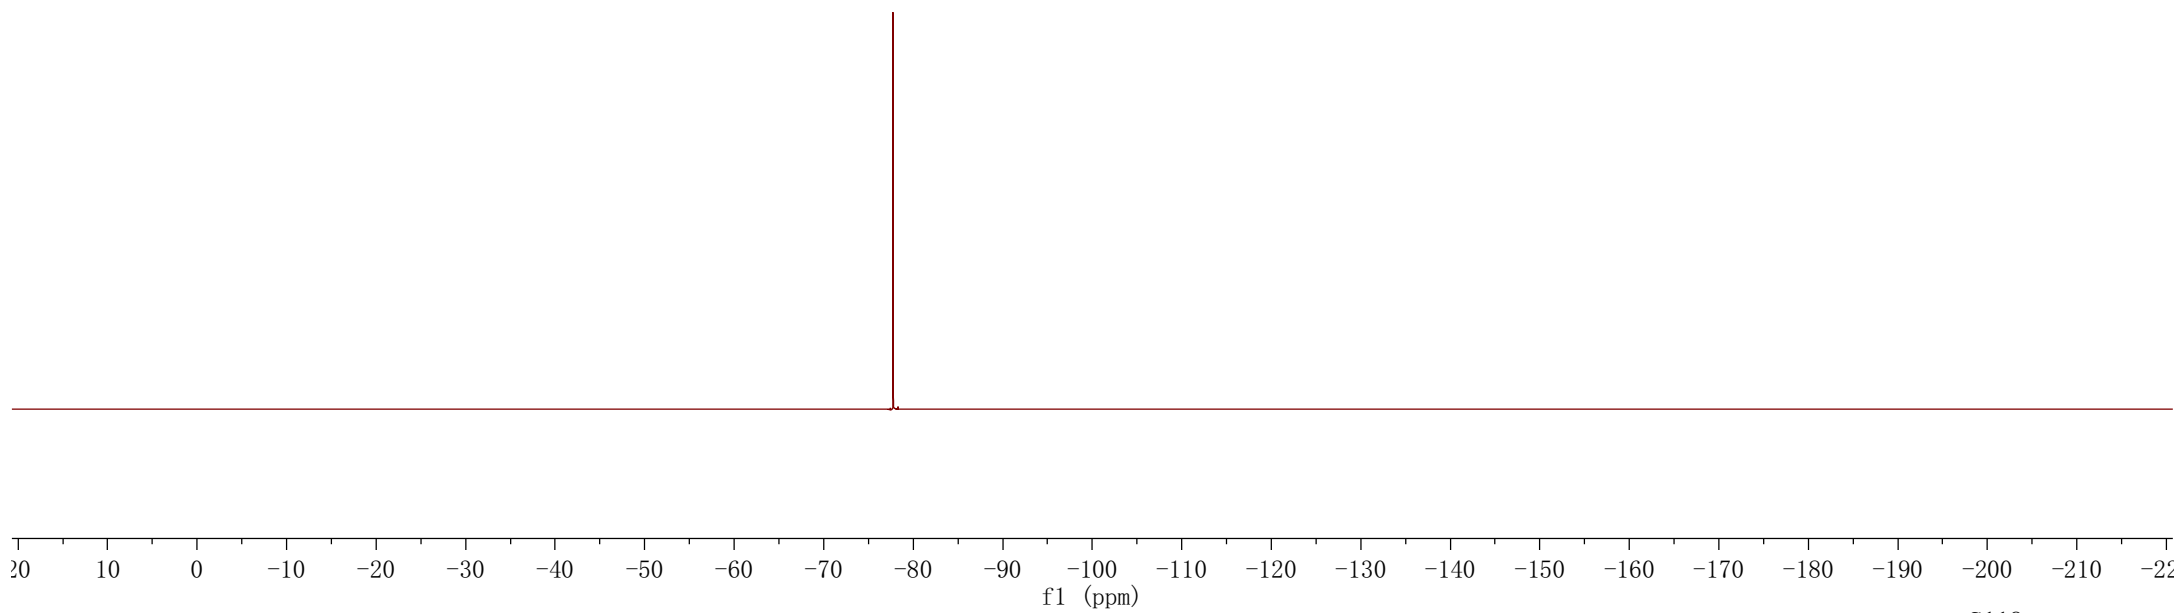

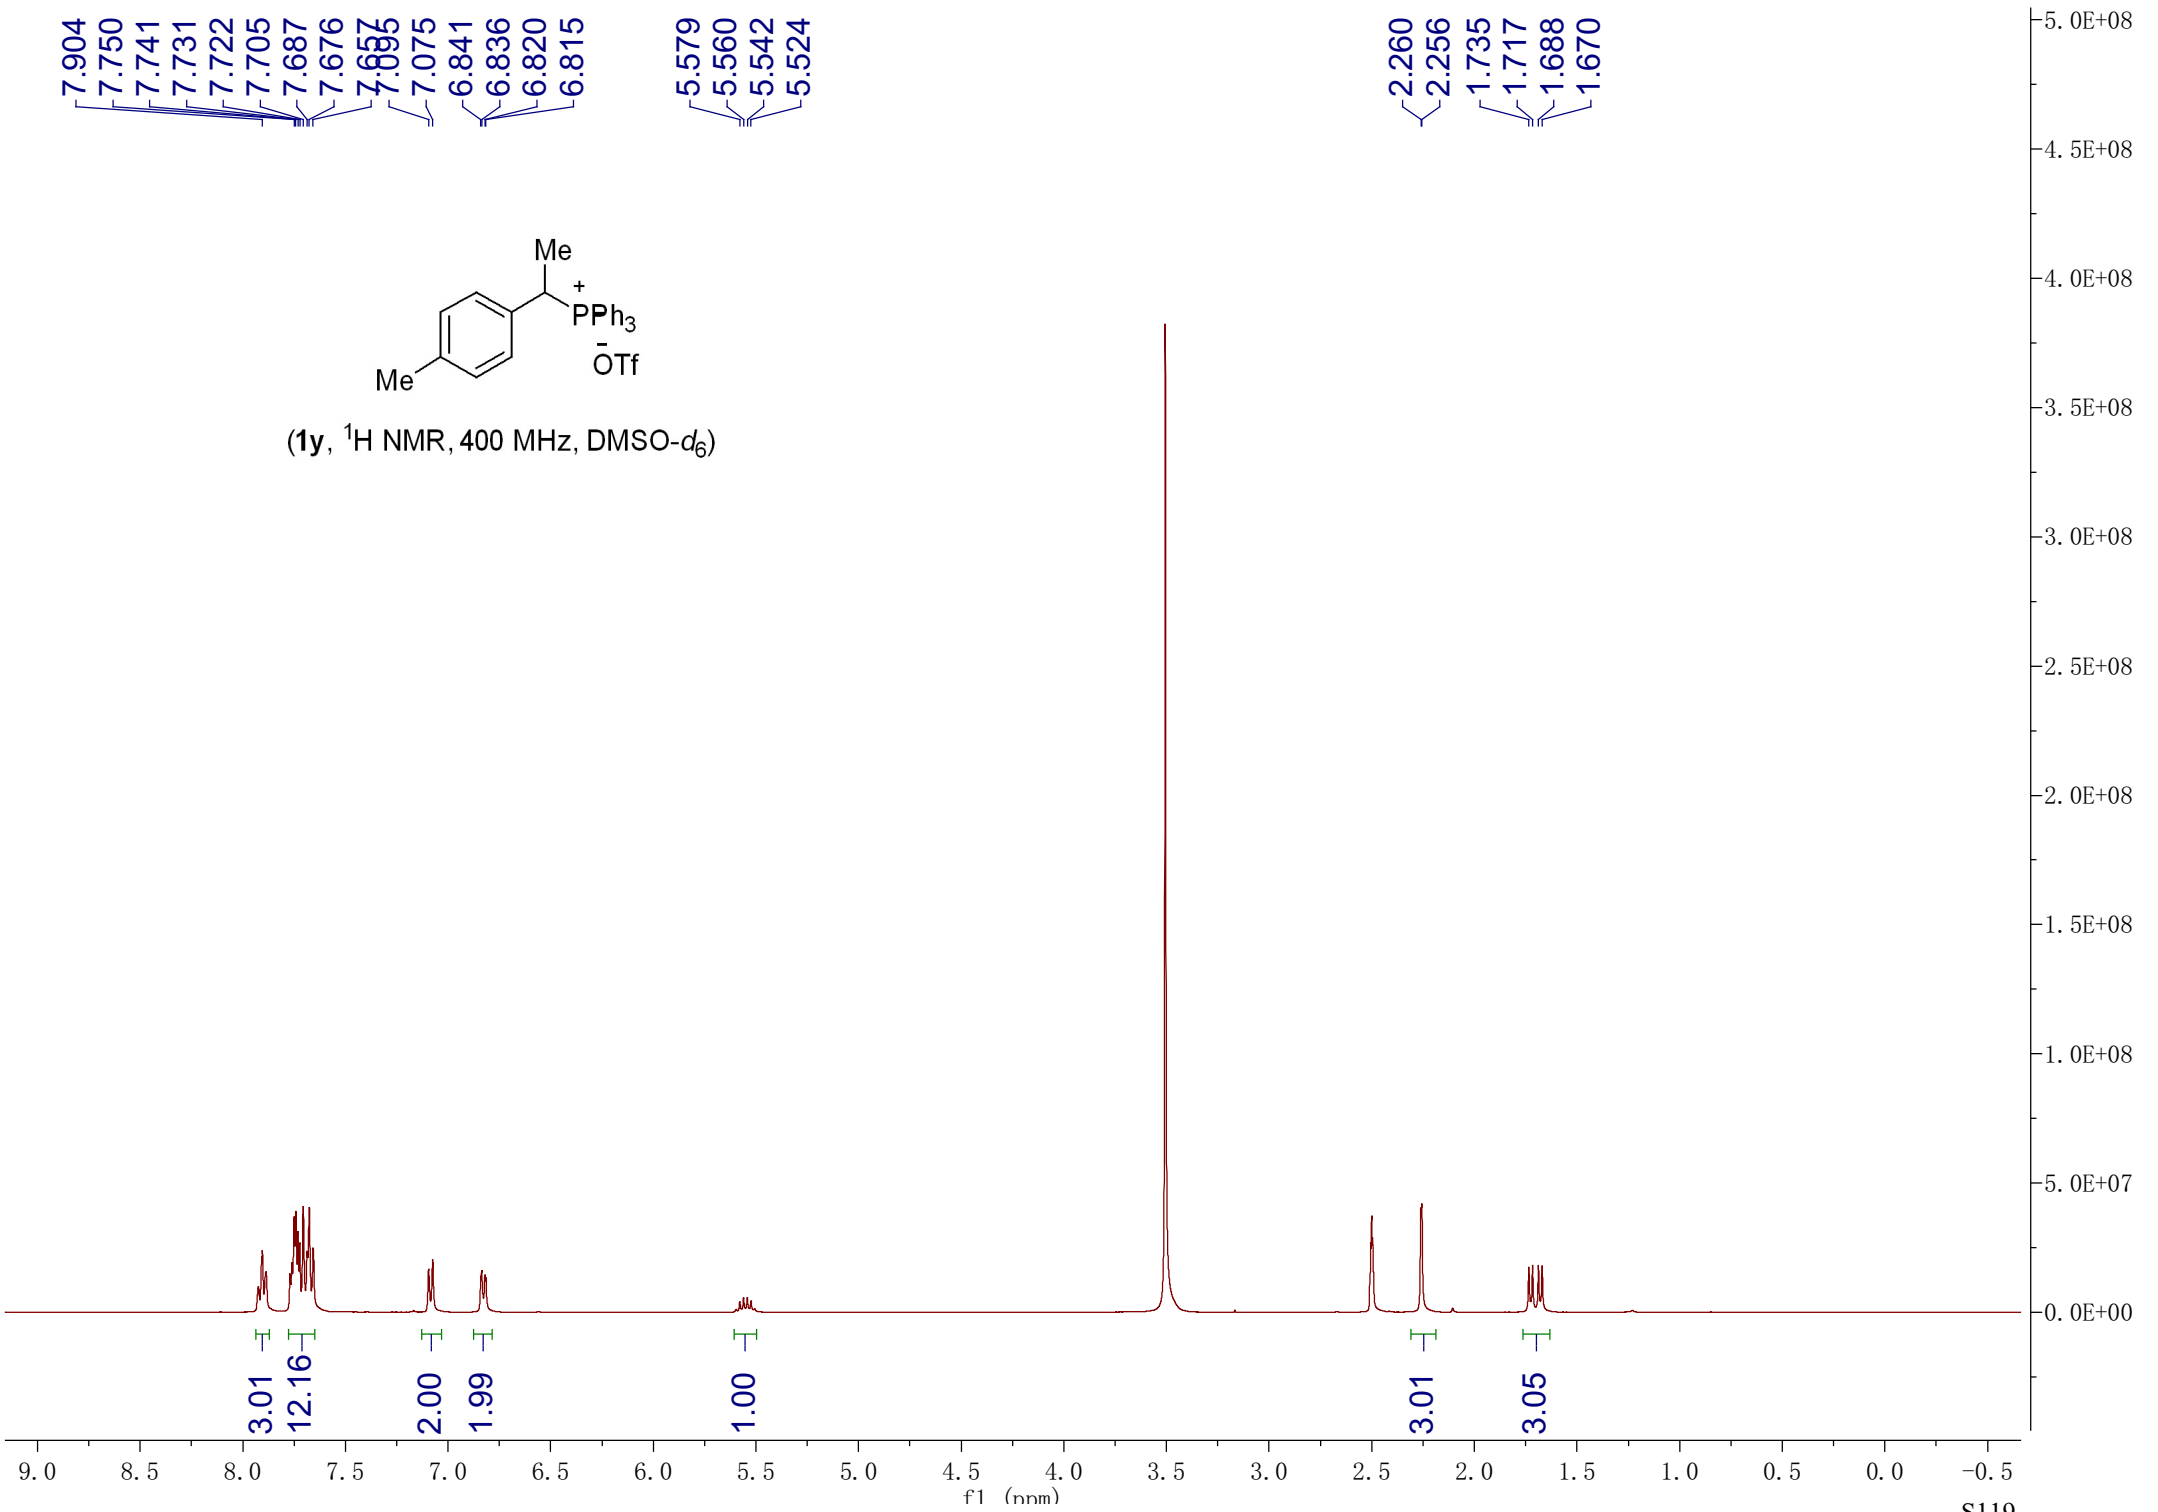

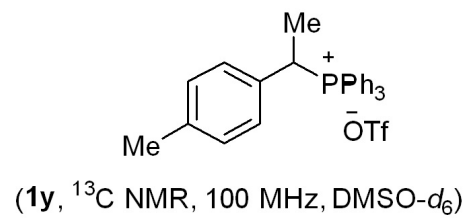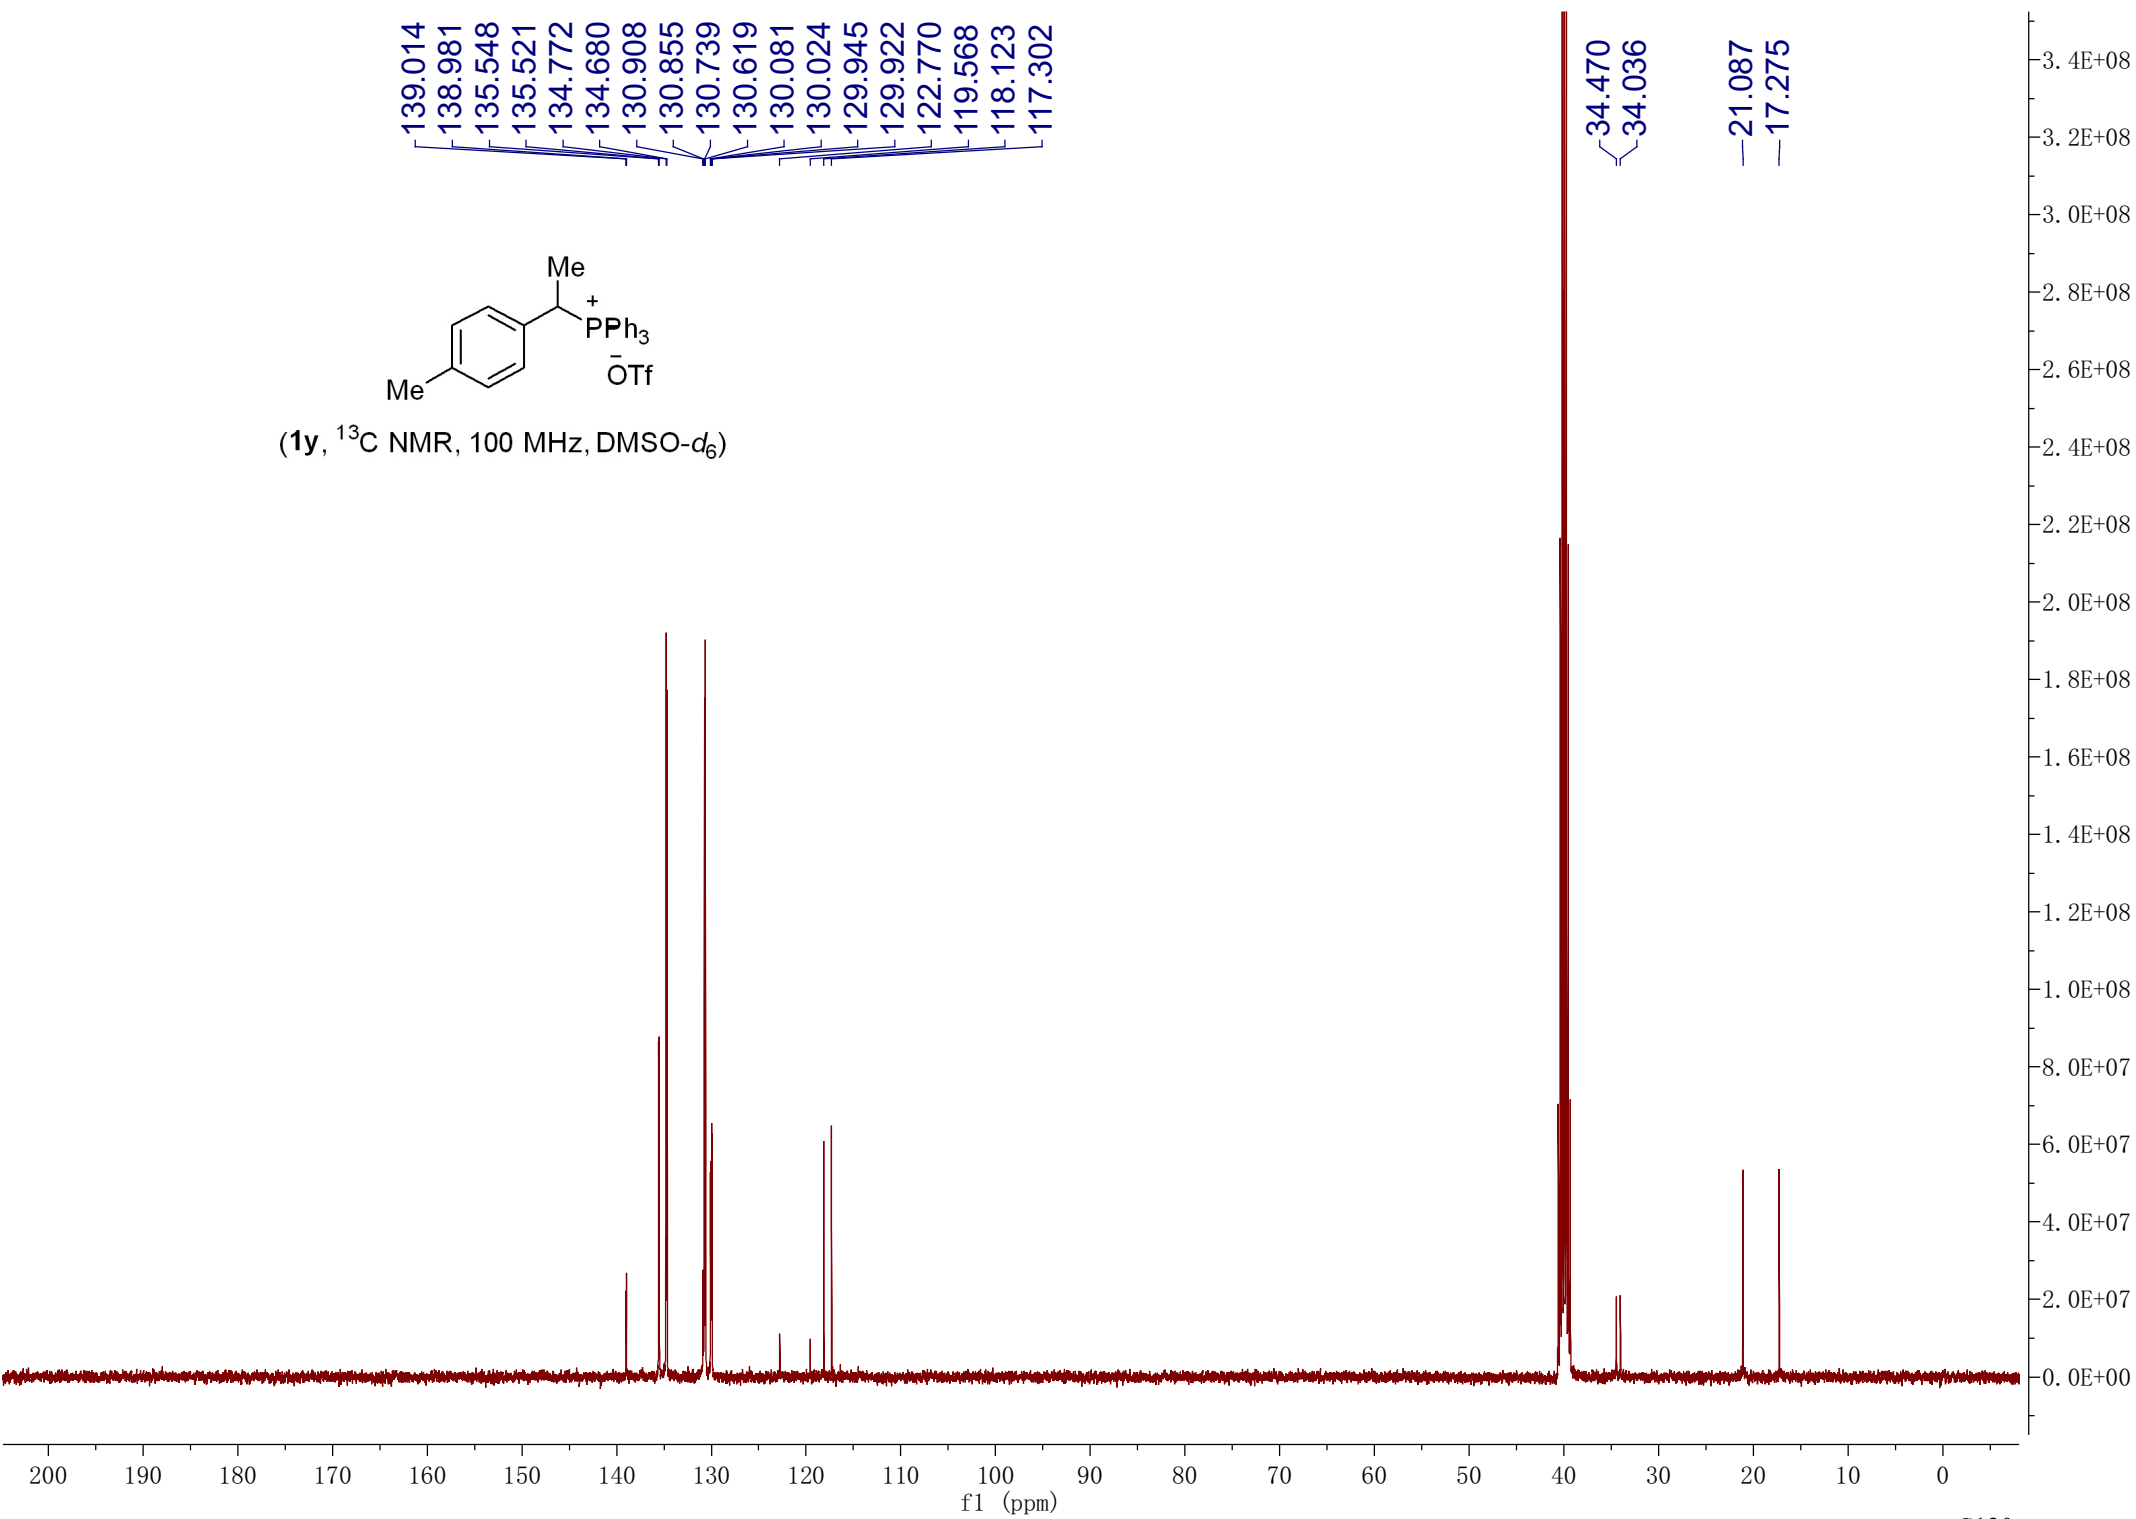



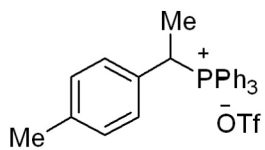

(1y,  $^{31}\text{P}$  NMR, 162 MHz,  $\text{DMSO-}d_6$ )

---77.729

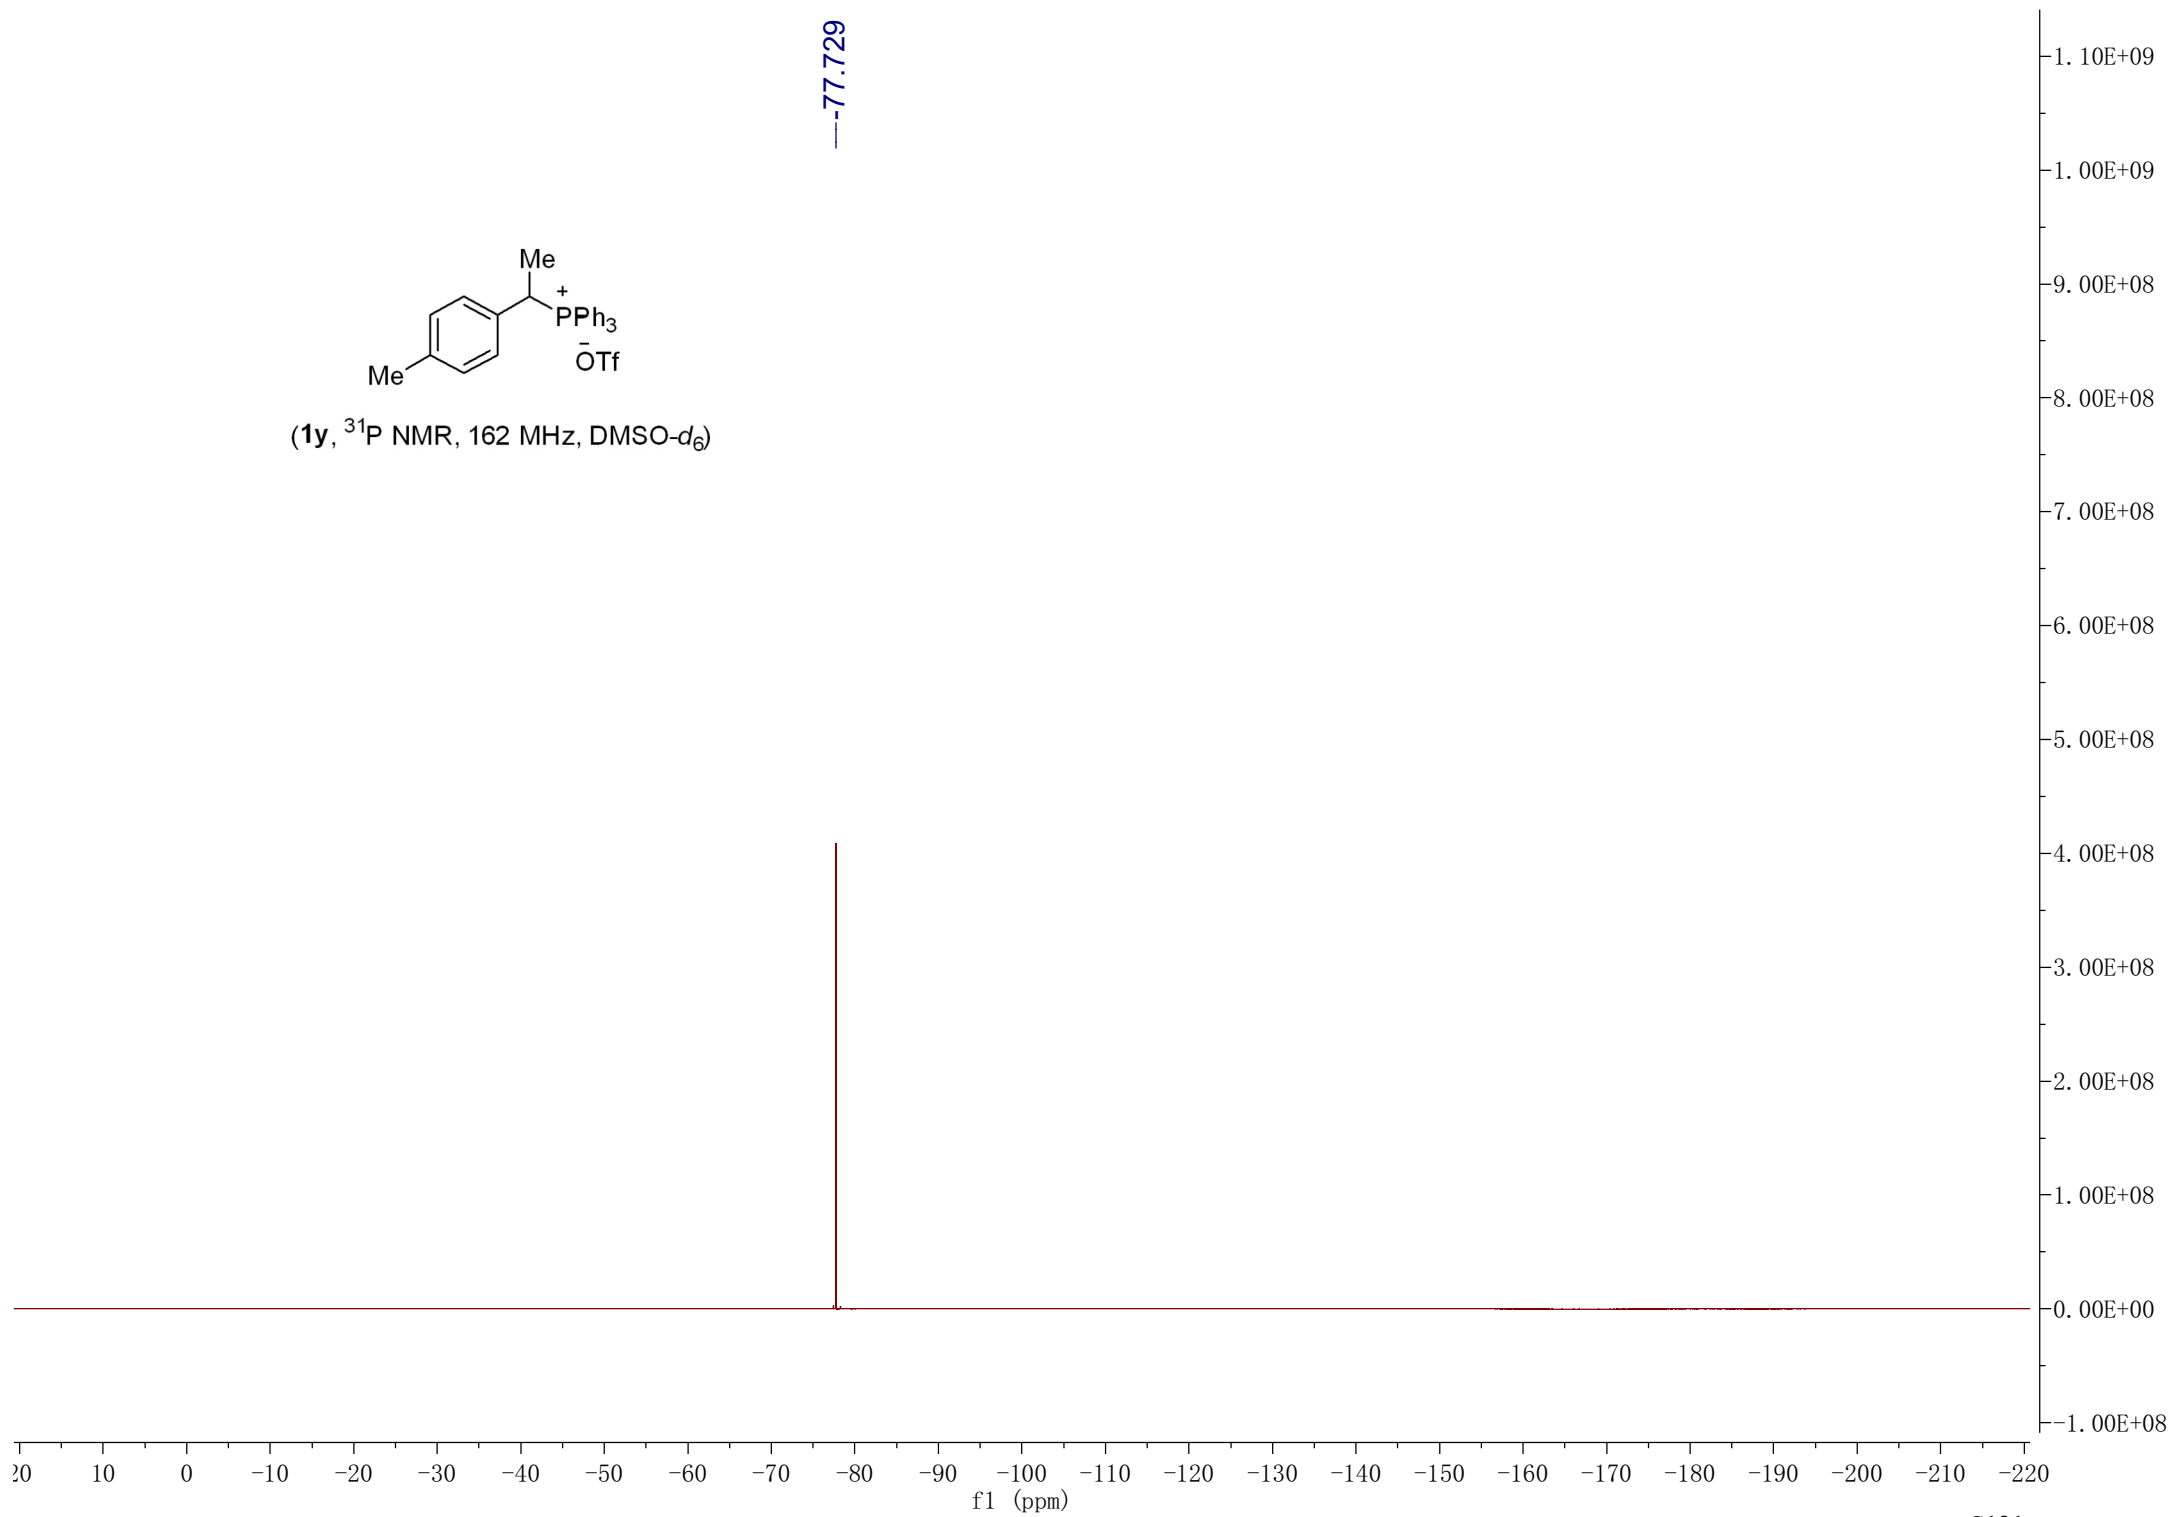

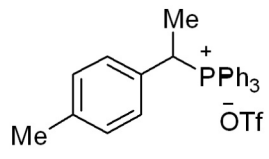

(1y, <sup>19</sup>F NMR, 376 MHz, DMSO-d<sub>6</sub>)

-25.971

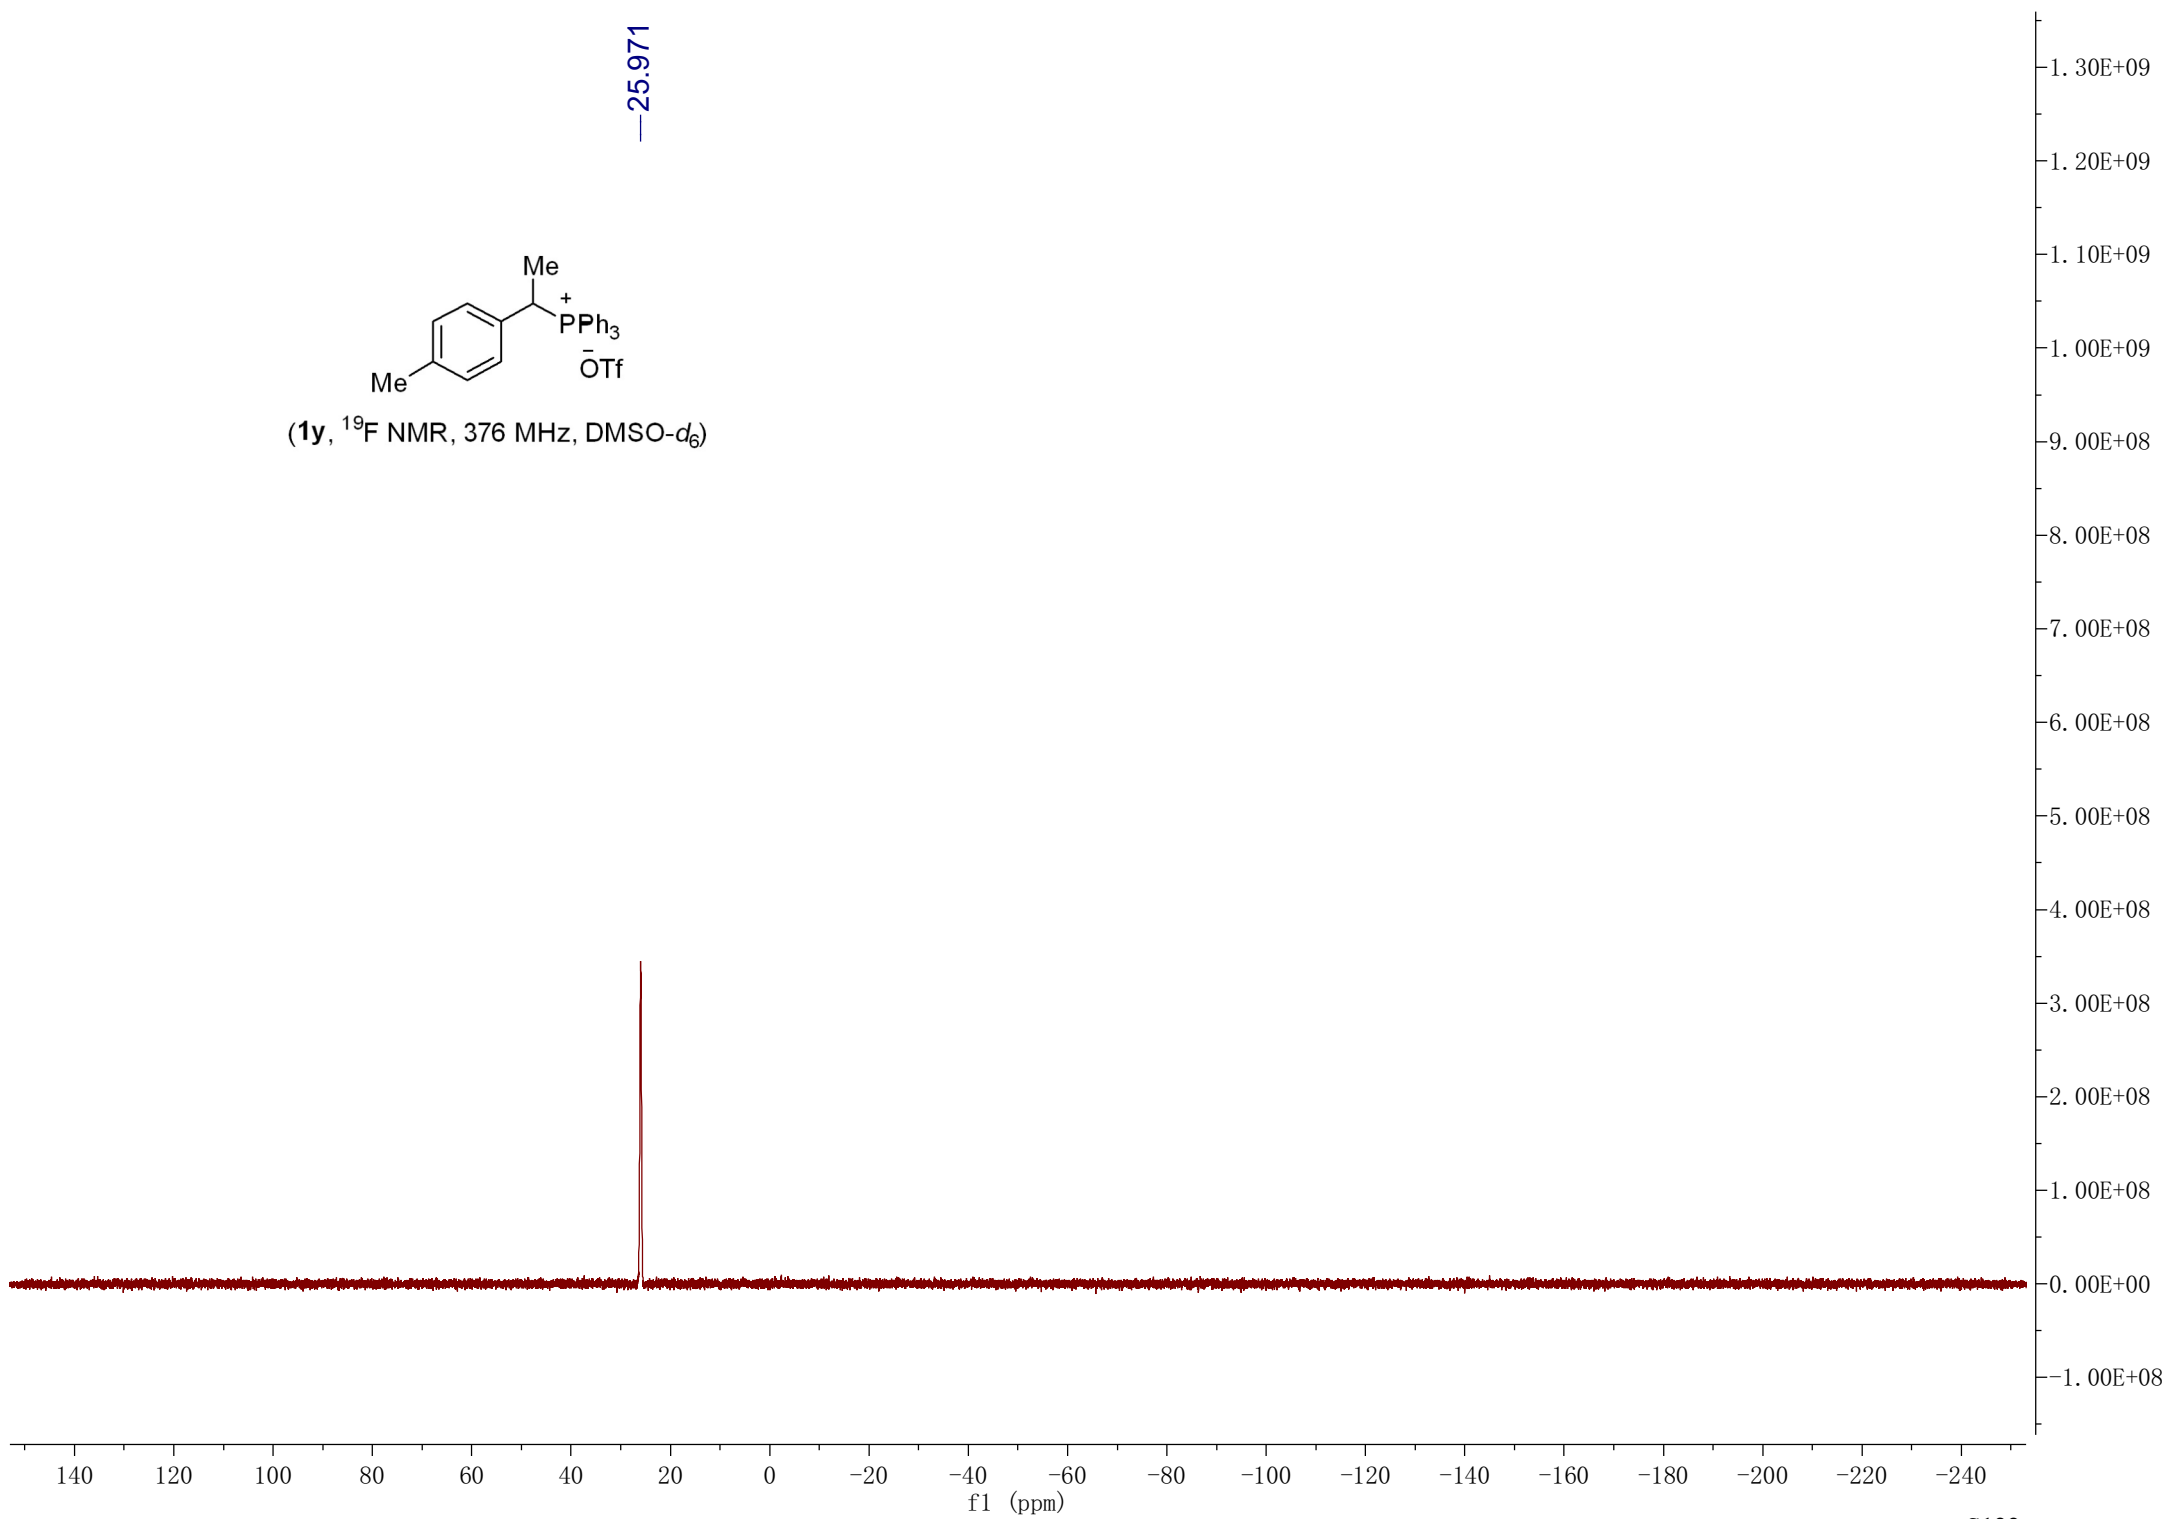

7.857  
7.855  
7.704  
7.695  
7.685  
7.676  
7.650  
7.631  
7.619  
7.609

6.531  
6.518

5.219  
5.181

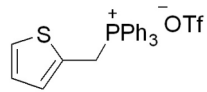

(1a', <sup>1</sup>H NMR, 400 MHz, DMSO-d<sub>6</sub>)

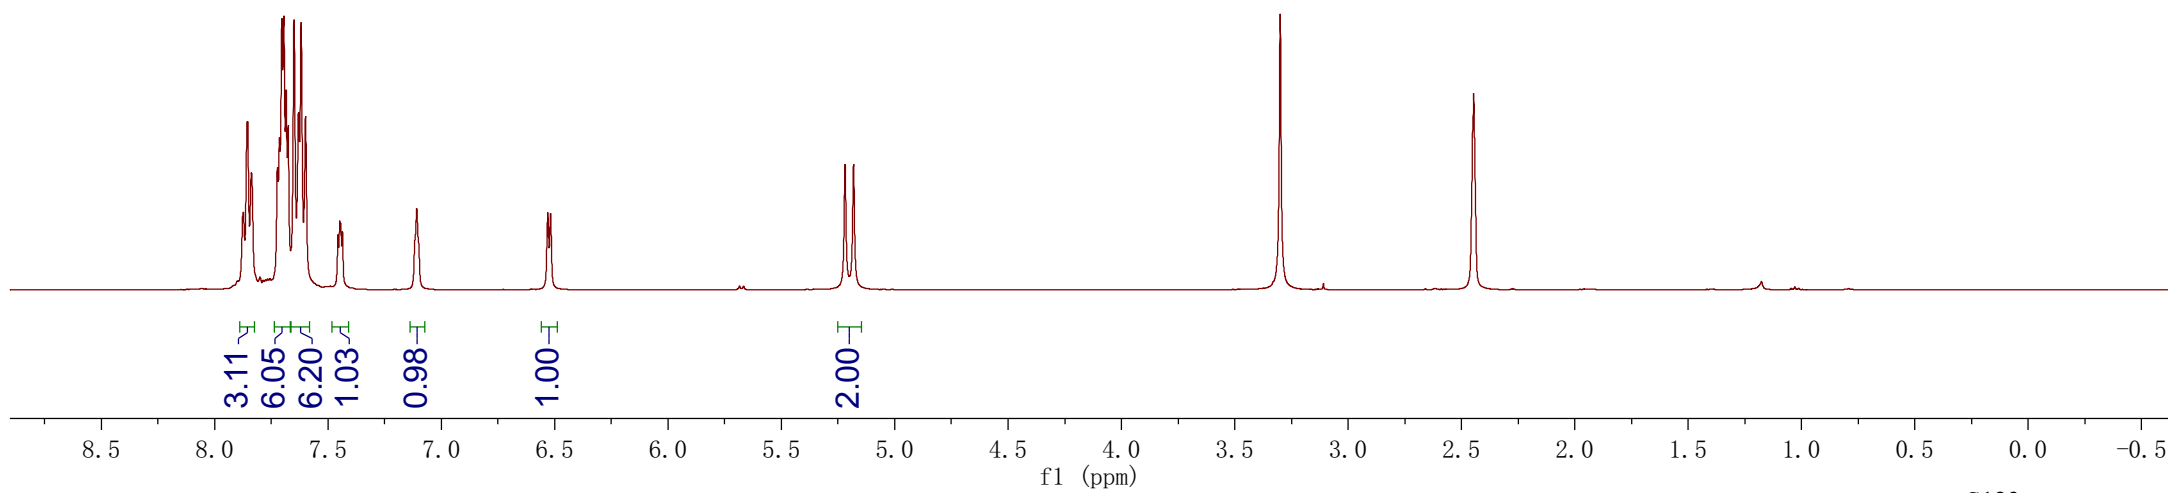

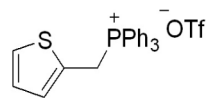

(1a',  $^{13}\text{C}$  NMR, 100 MHz, DMSO- $d_6$ )

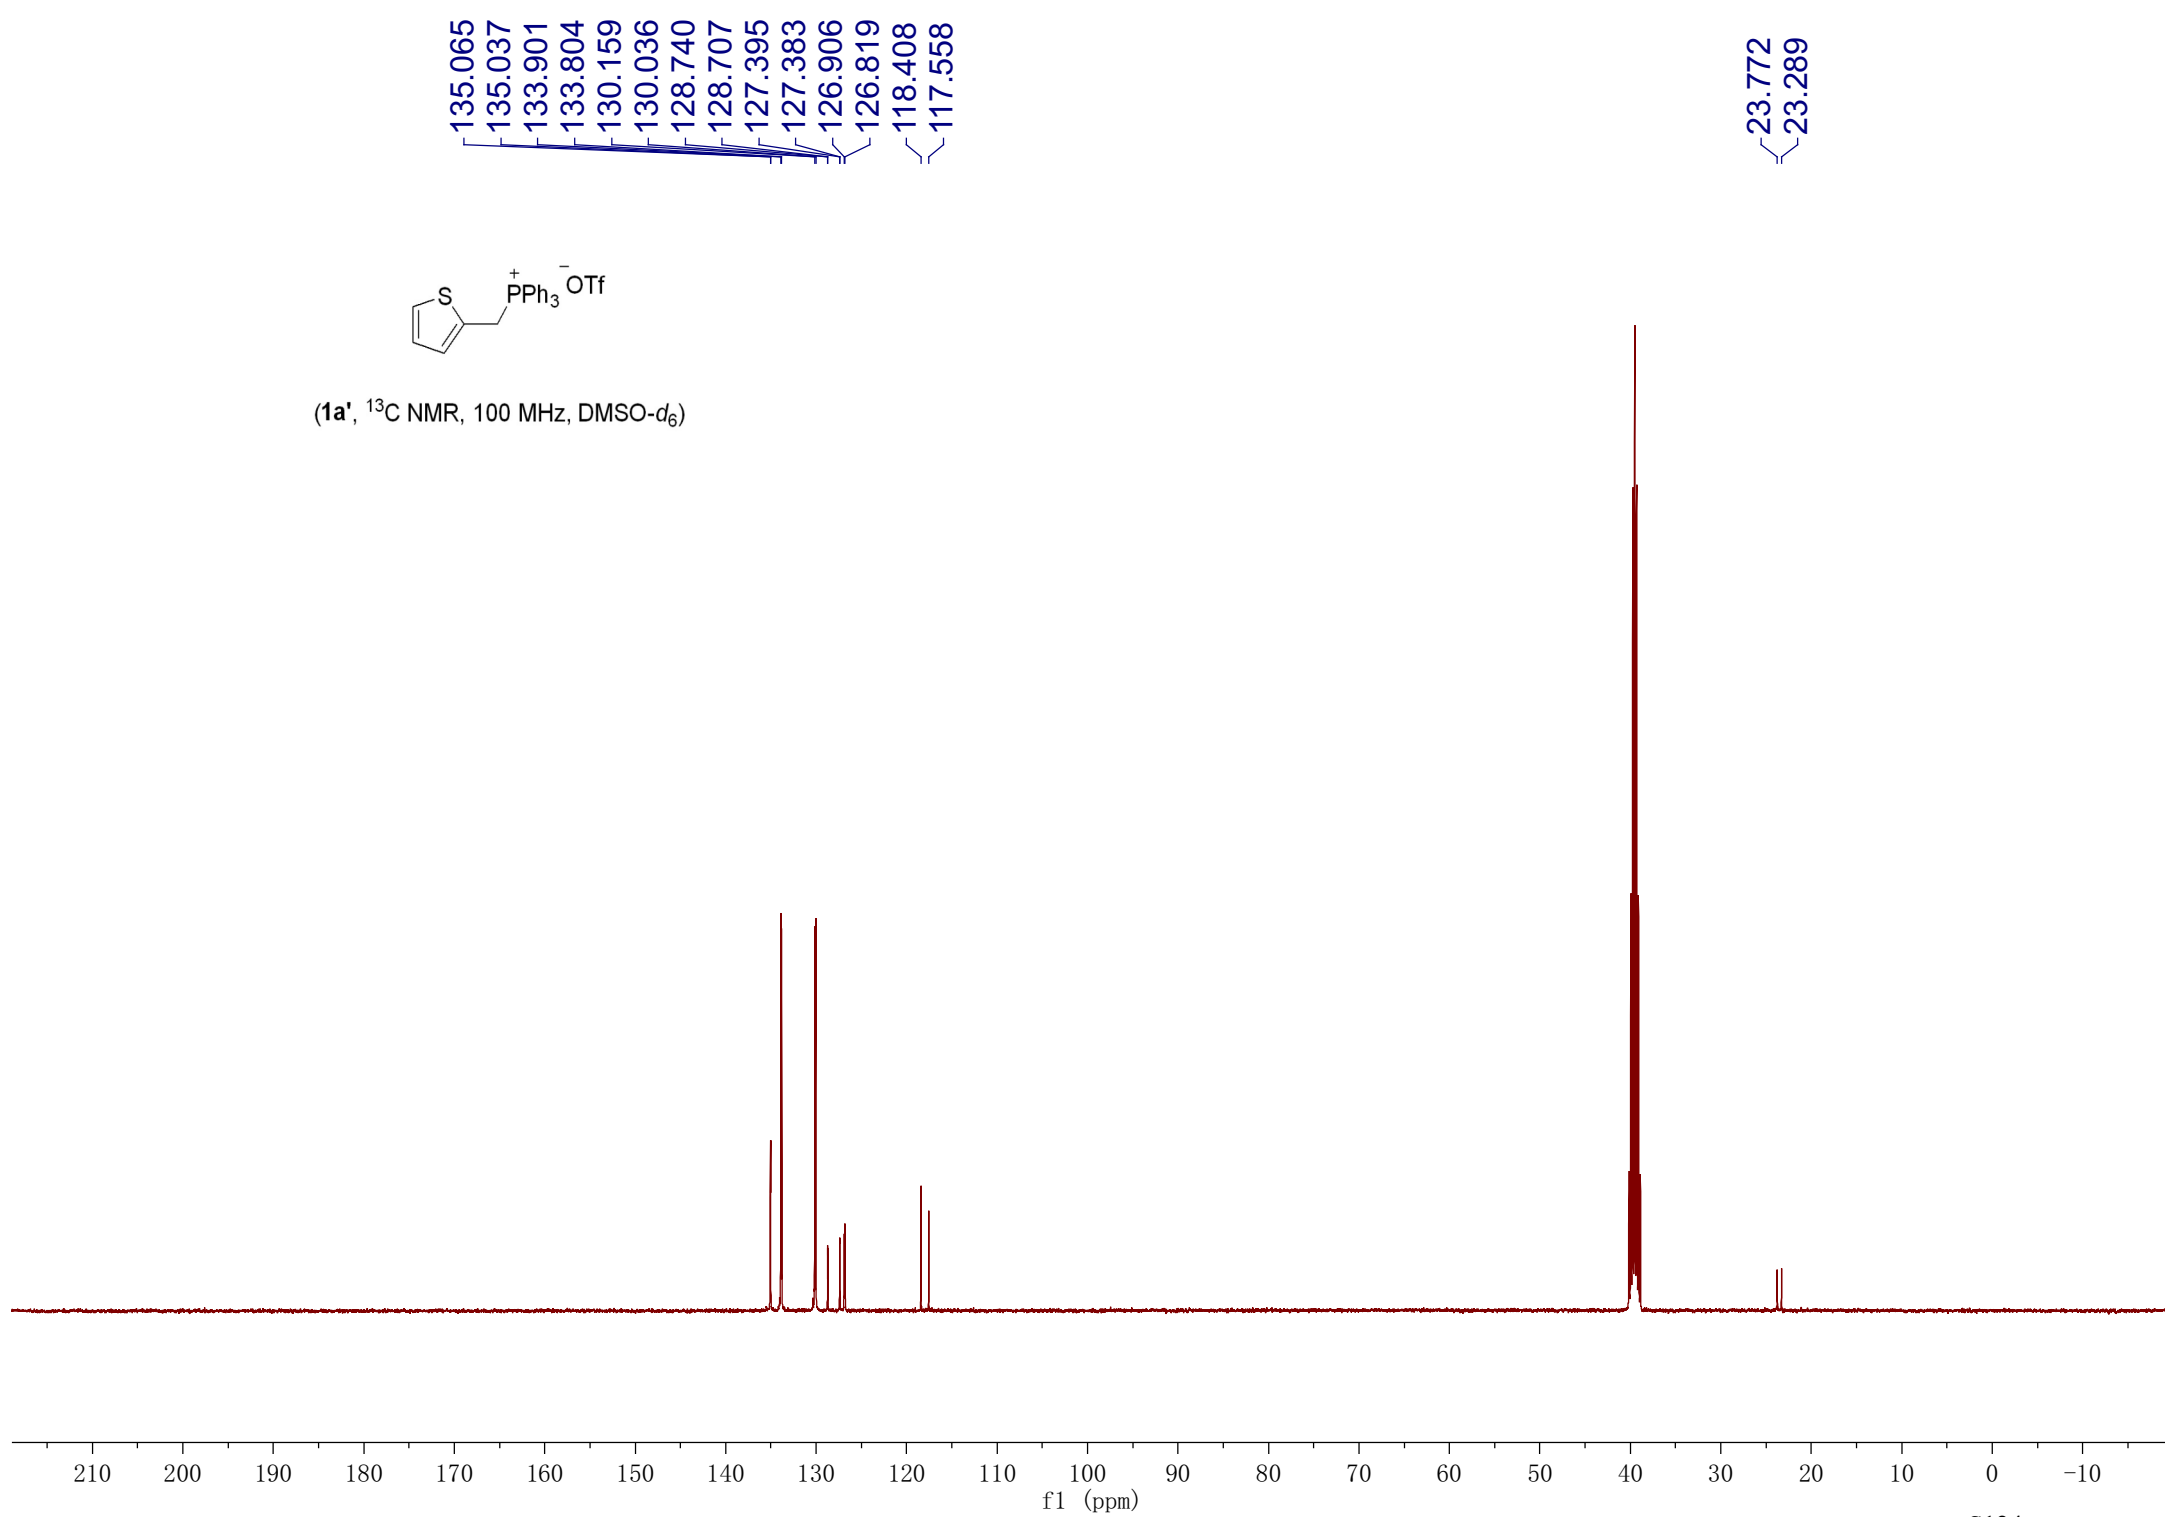

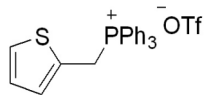

(1a',  $^{19}\text{F}$  NMR, 376 MHz,  $\text{DMSO-}d_6$ )

--77.721

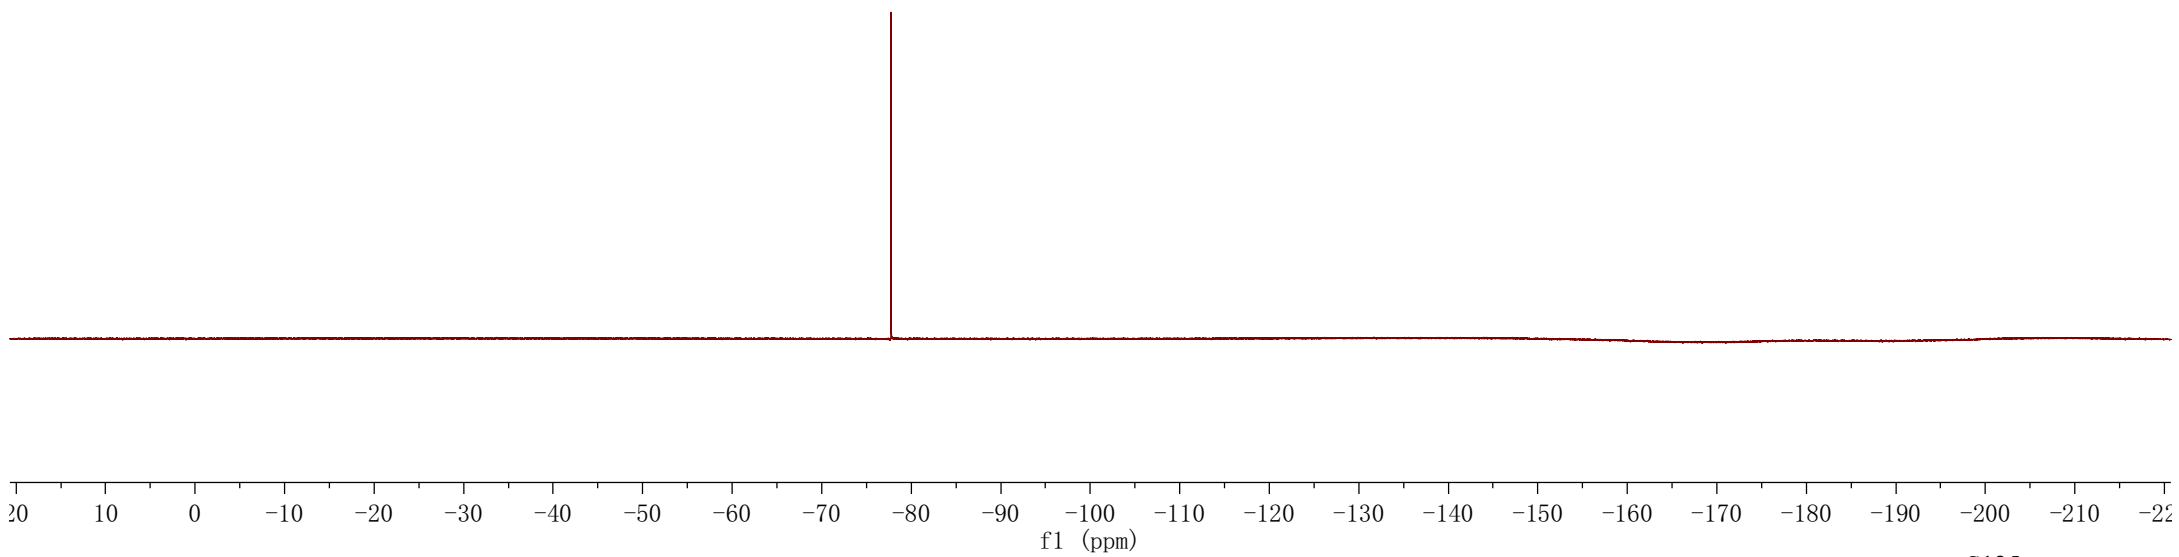

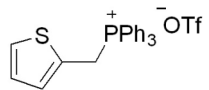

(1a',  $^{31}\text{P}$  NMR, 162 MHz,  $\text{DMSO-}d_6$ )

—21.792

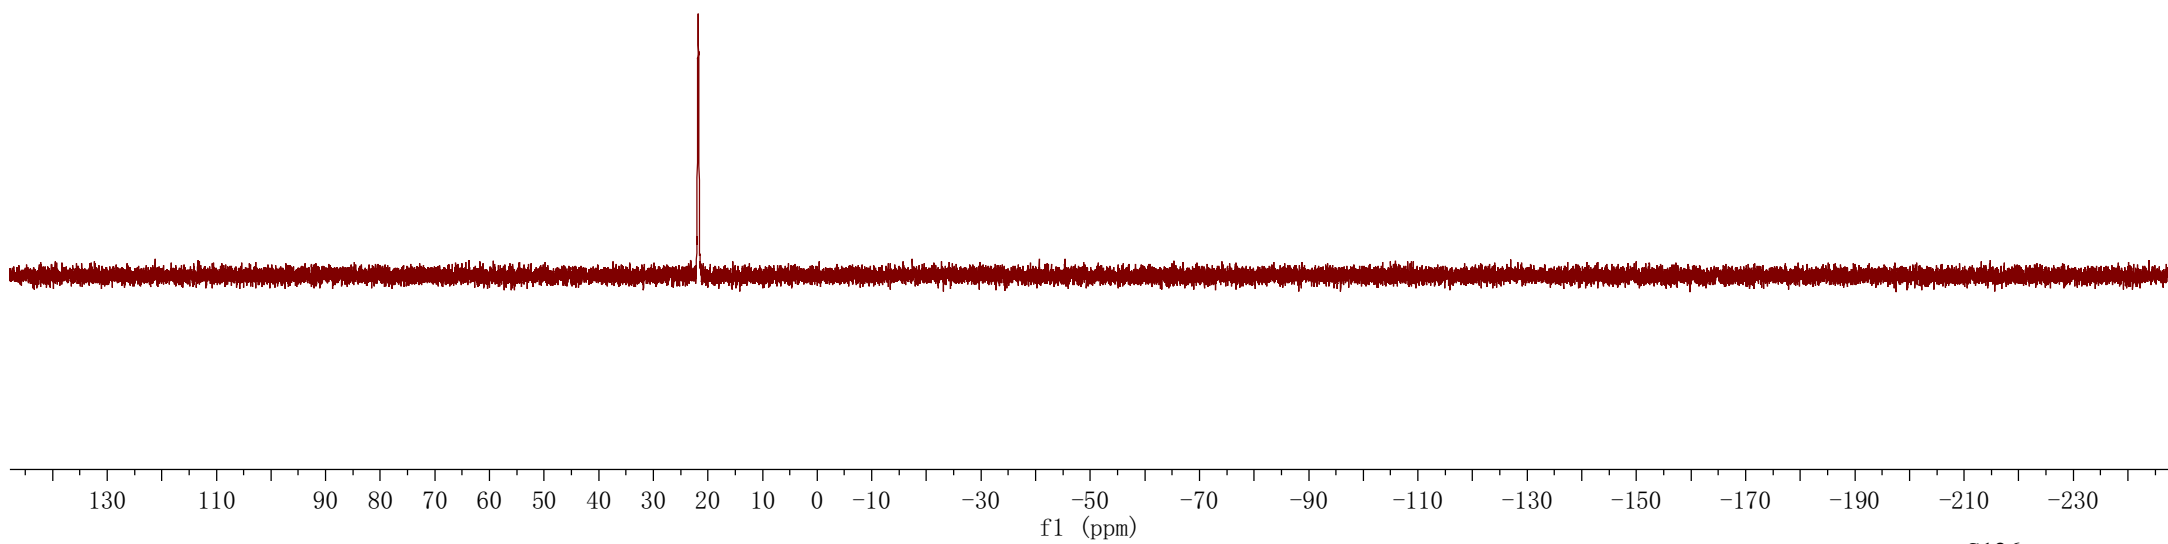

7.367  
7.363  
7.348  
7.331  
7.304  
7.295  
7.286

3.661

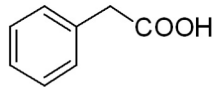

(2a,  $^1\text{H}$  NMR, 400 MHz,  $\text{CDCl}_3$ )

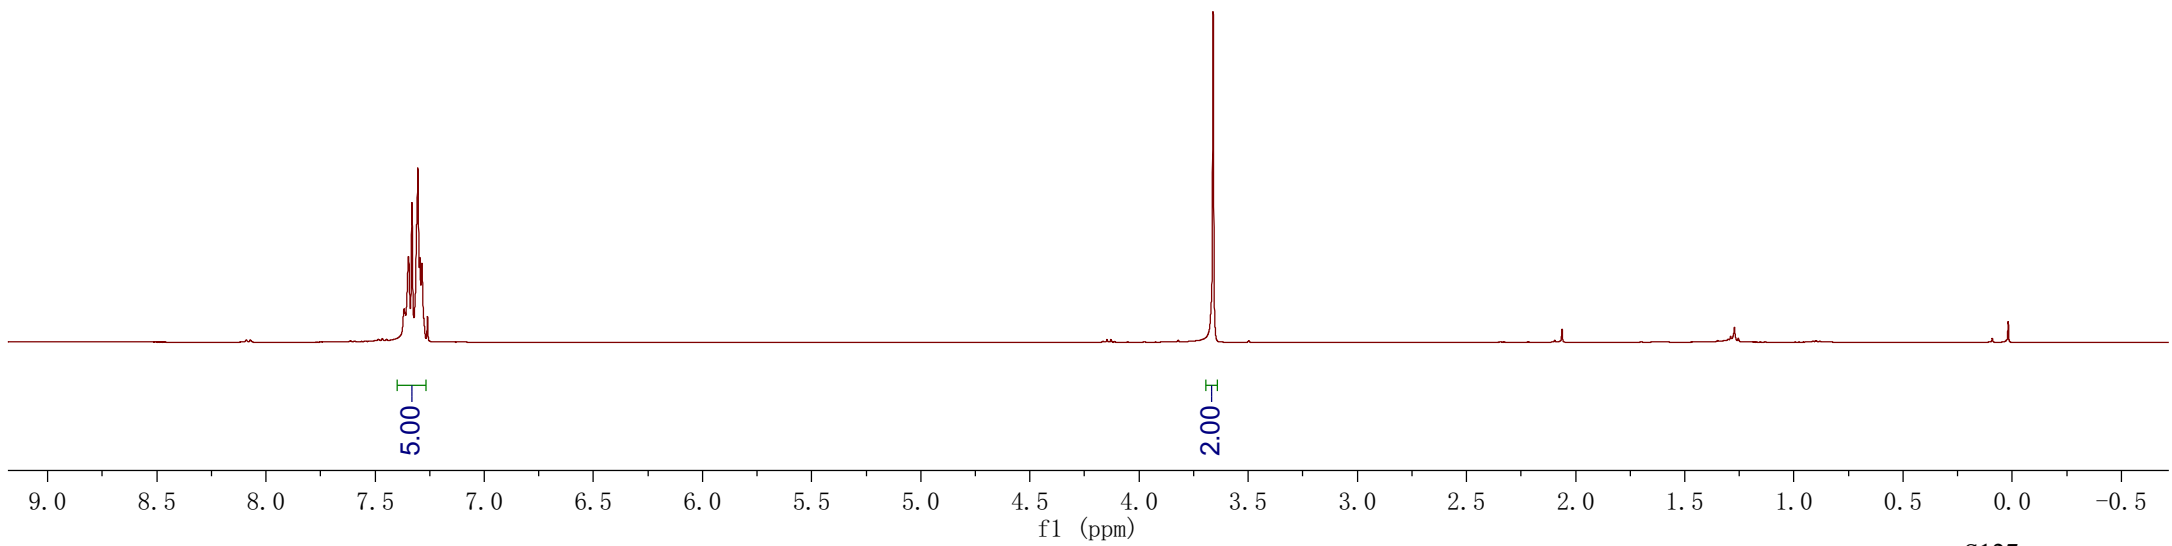

—178.071

133.390  
129.511  
128.786  
127.491

—41.198

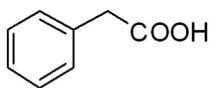

(2a,  $^{13}\text{C}$  NMR, 100 MHz,  $\text{CDCl}_3$ )

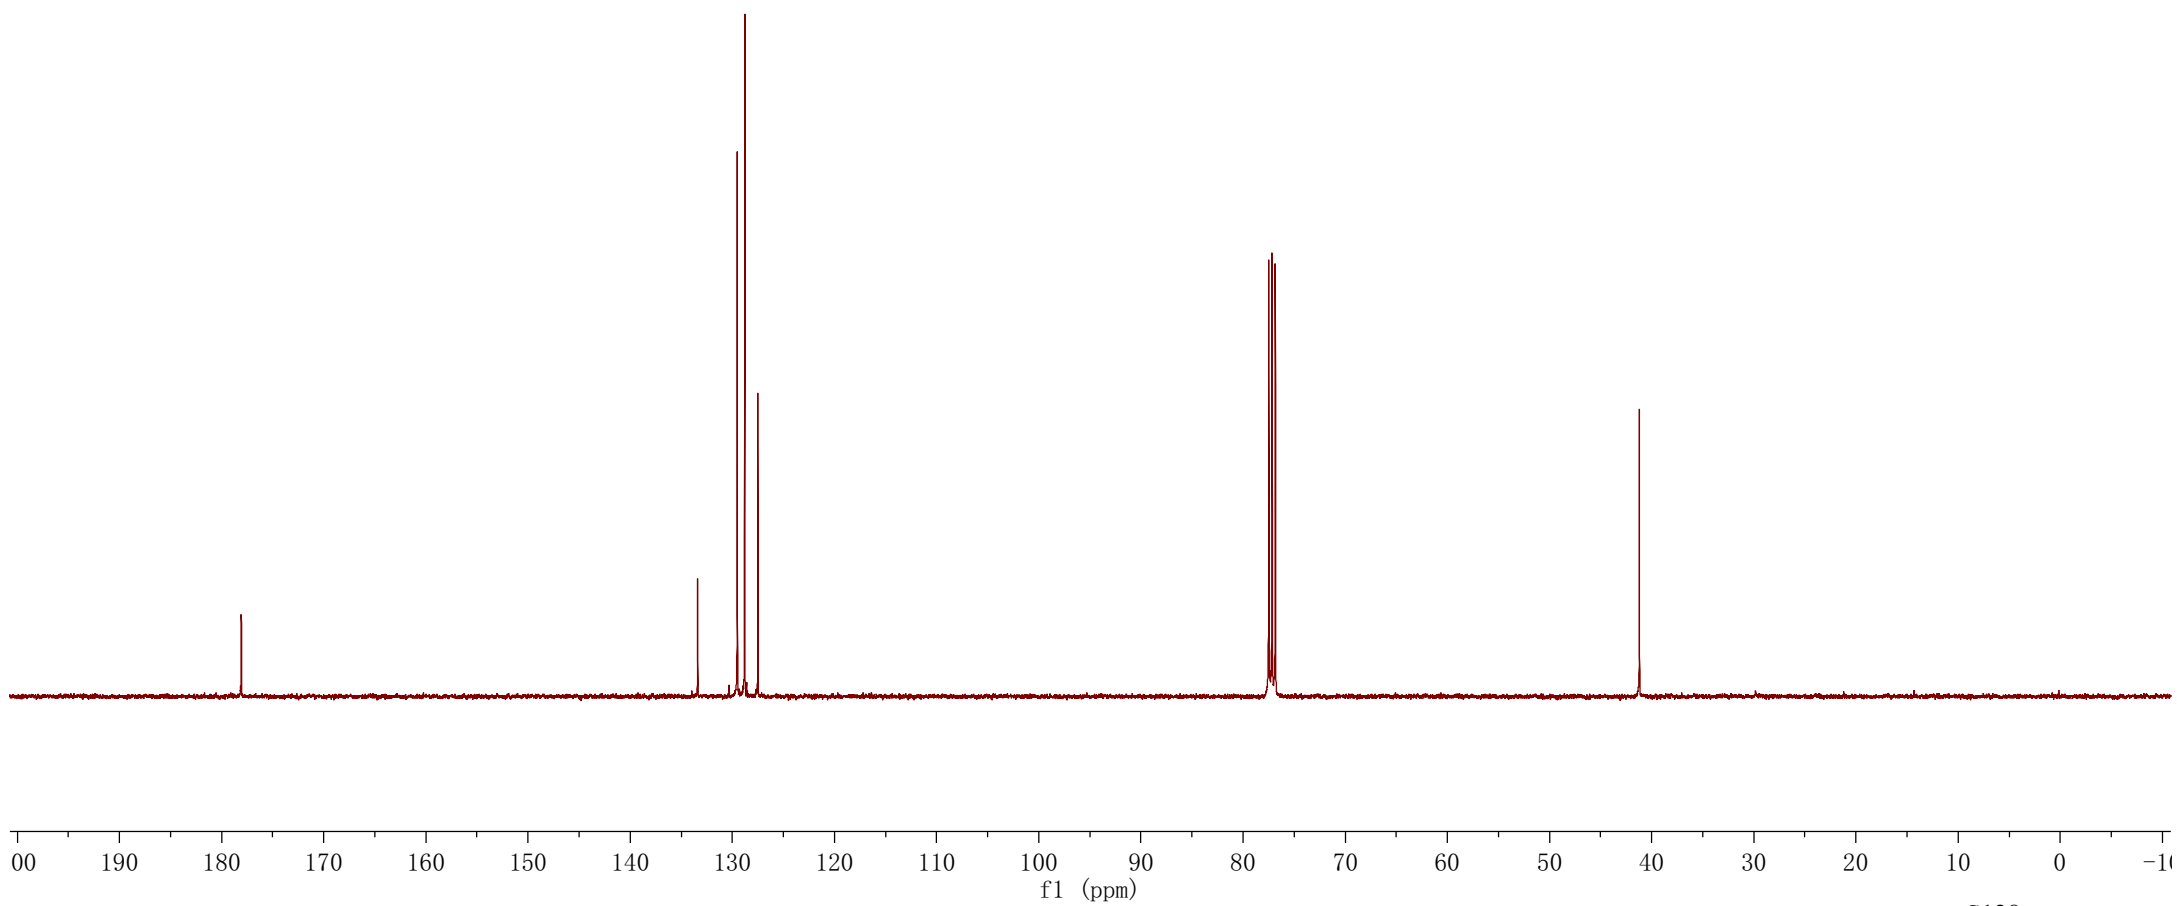



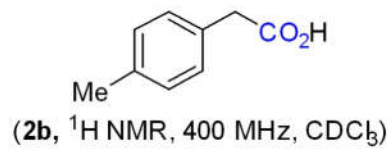

7.189  
7.170  
7.163

3.619

2.345

0.087

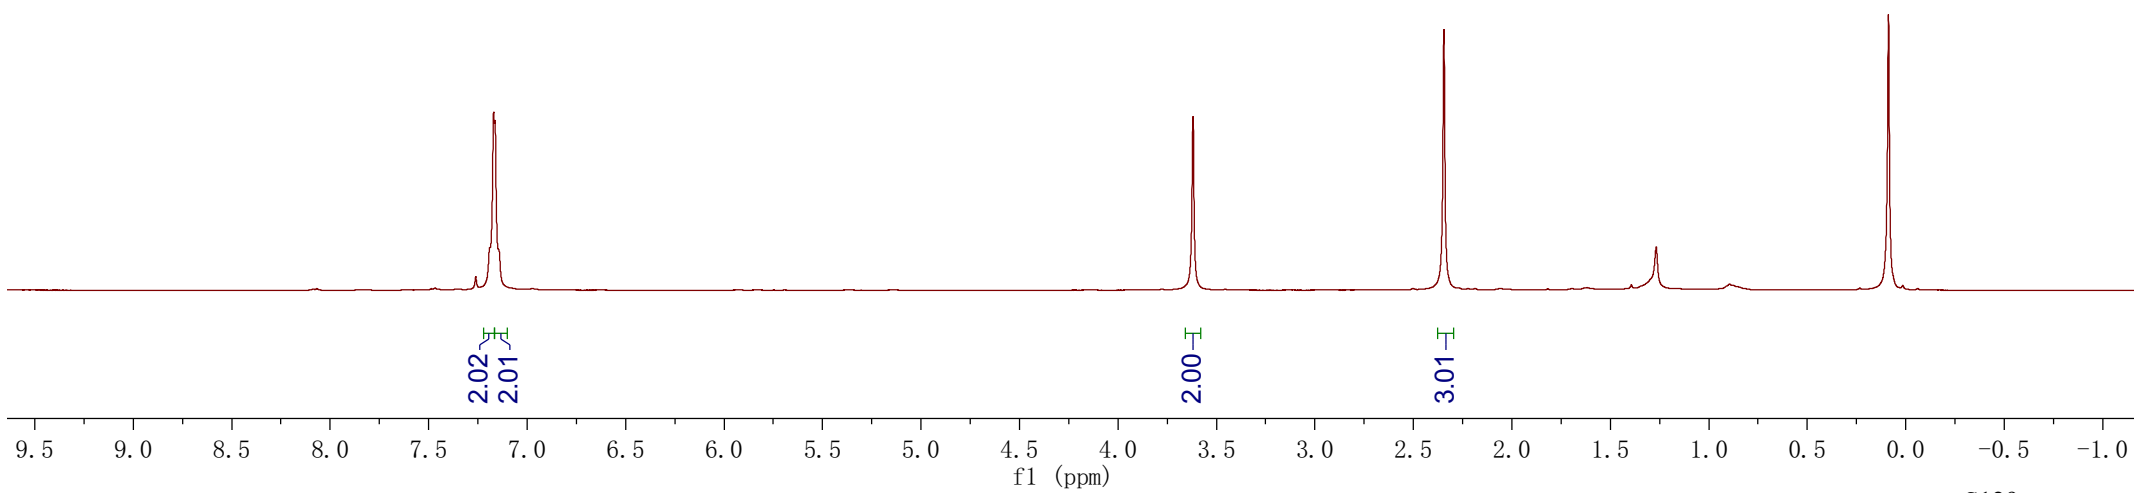

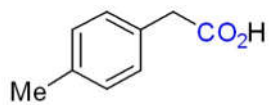

(2b,  $^{13}\text{C}$  NMR, 100 MHz,  $\text{CDCl}_3$ )

—178.388

—137.166

—130.316

—129.485

—129.373

—40.759

—21.231

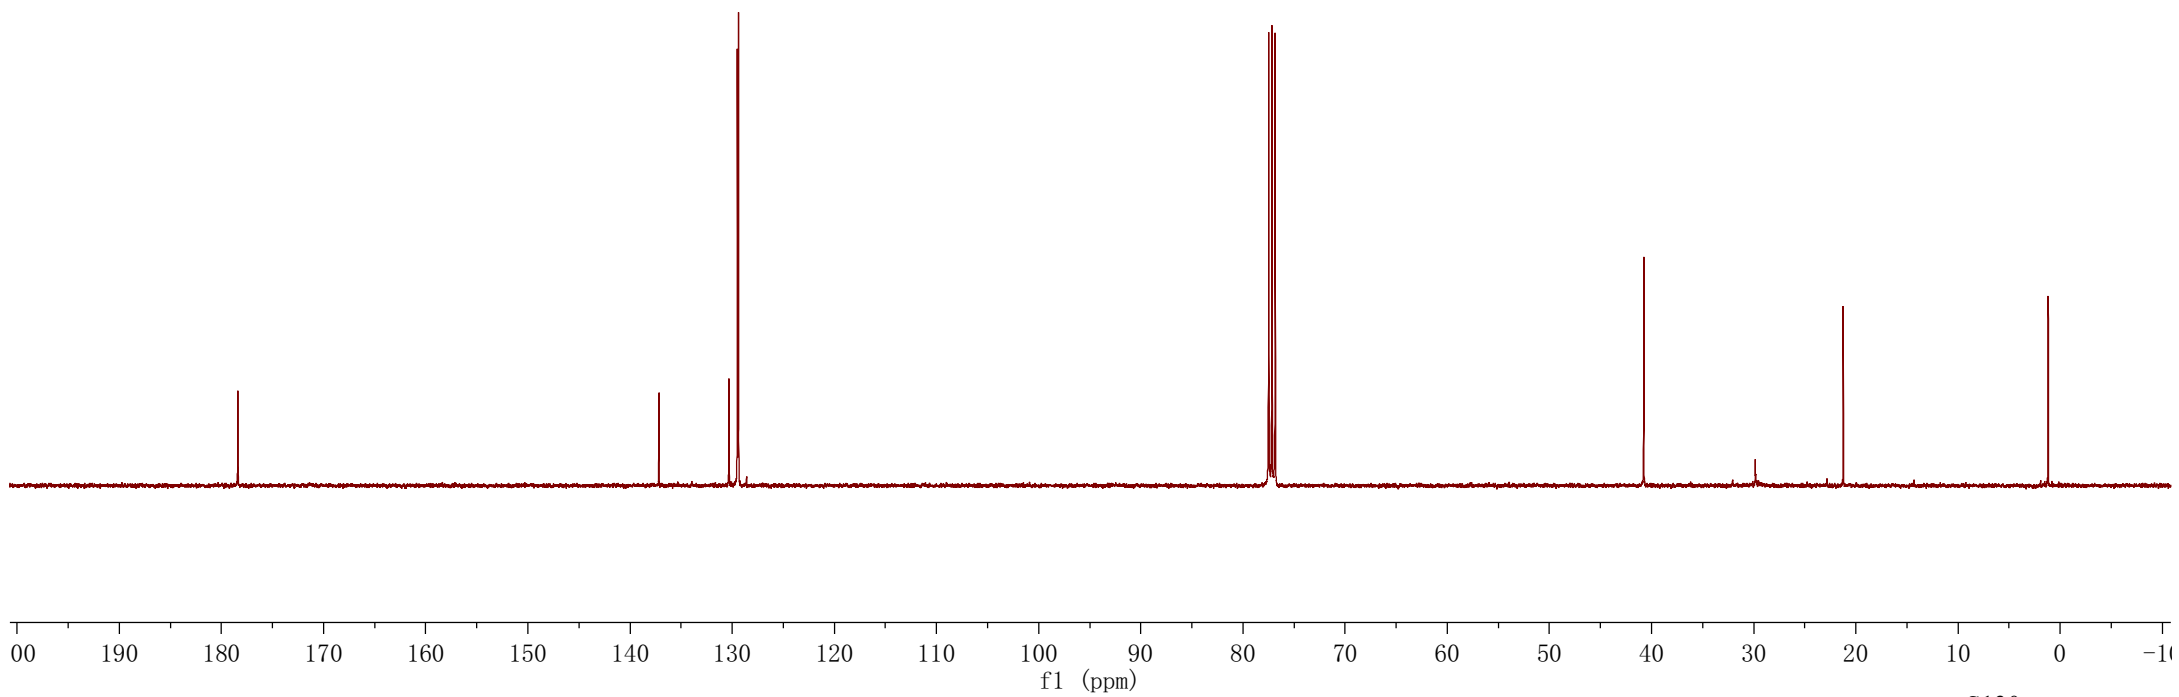

7.376  
7.357  
7.239  
7.219

3.627

1.320

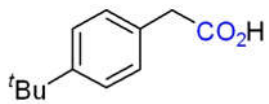

(2c,  $^1\text{H}$  NMR, 400 MHz,  $\text{CDCl}_3$ )

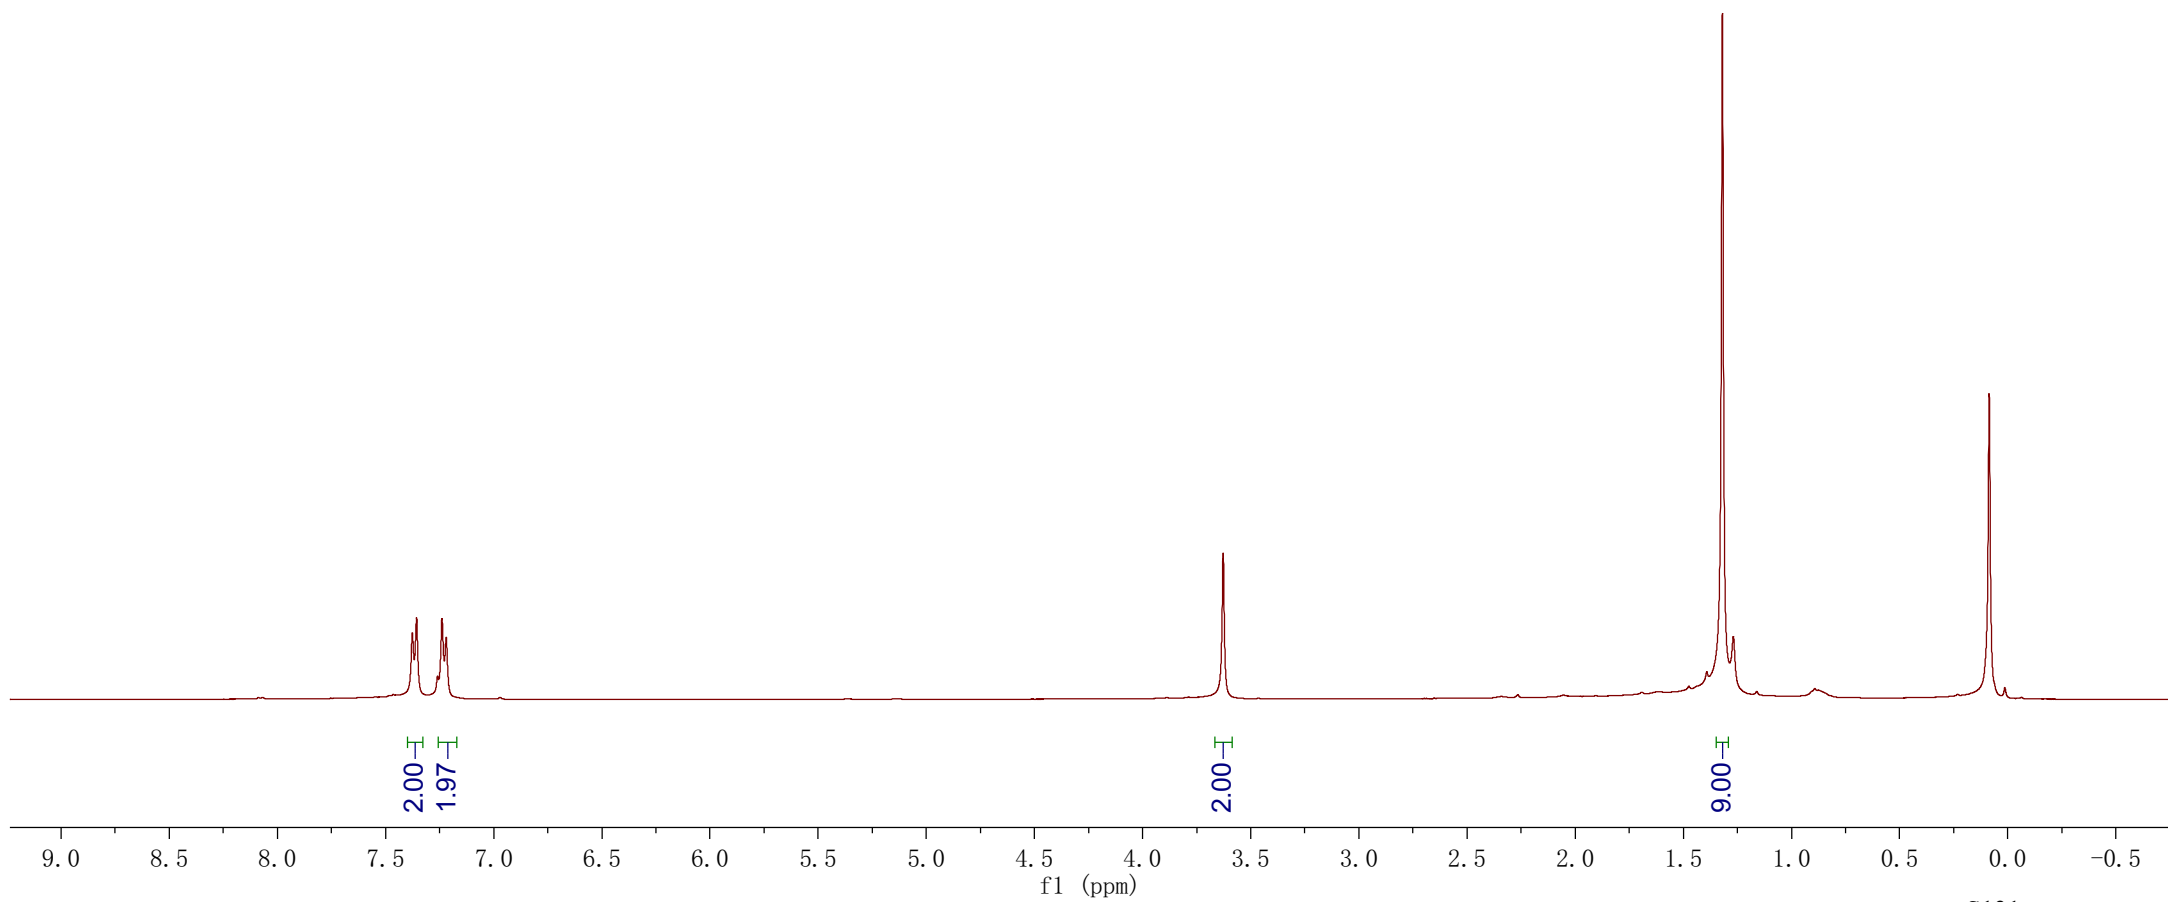

—178.113

—150.373

—130.353

—129.163

—125.745

—40.680

—34.619

—31.463

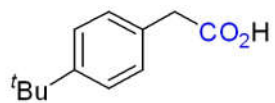

(2c,  $^{13}\text{C}$  NMR, 100 MHz,  $\text{CDCl}_3$ )

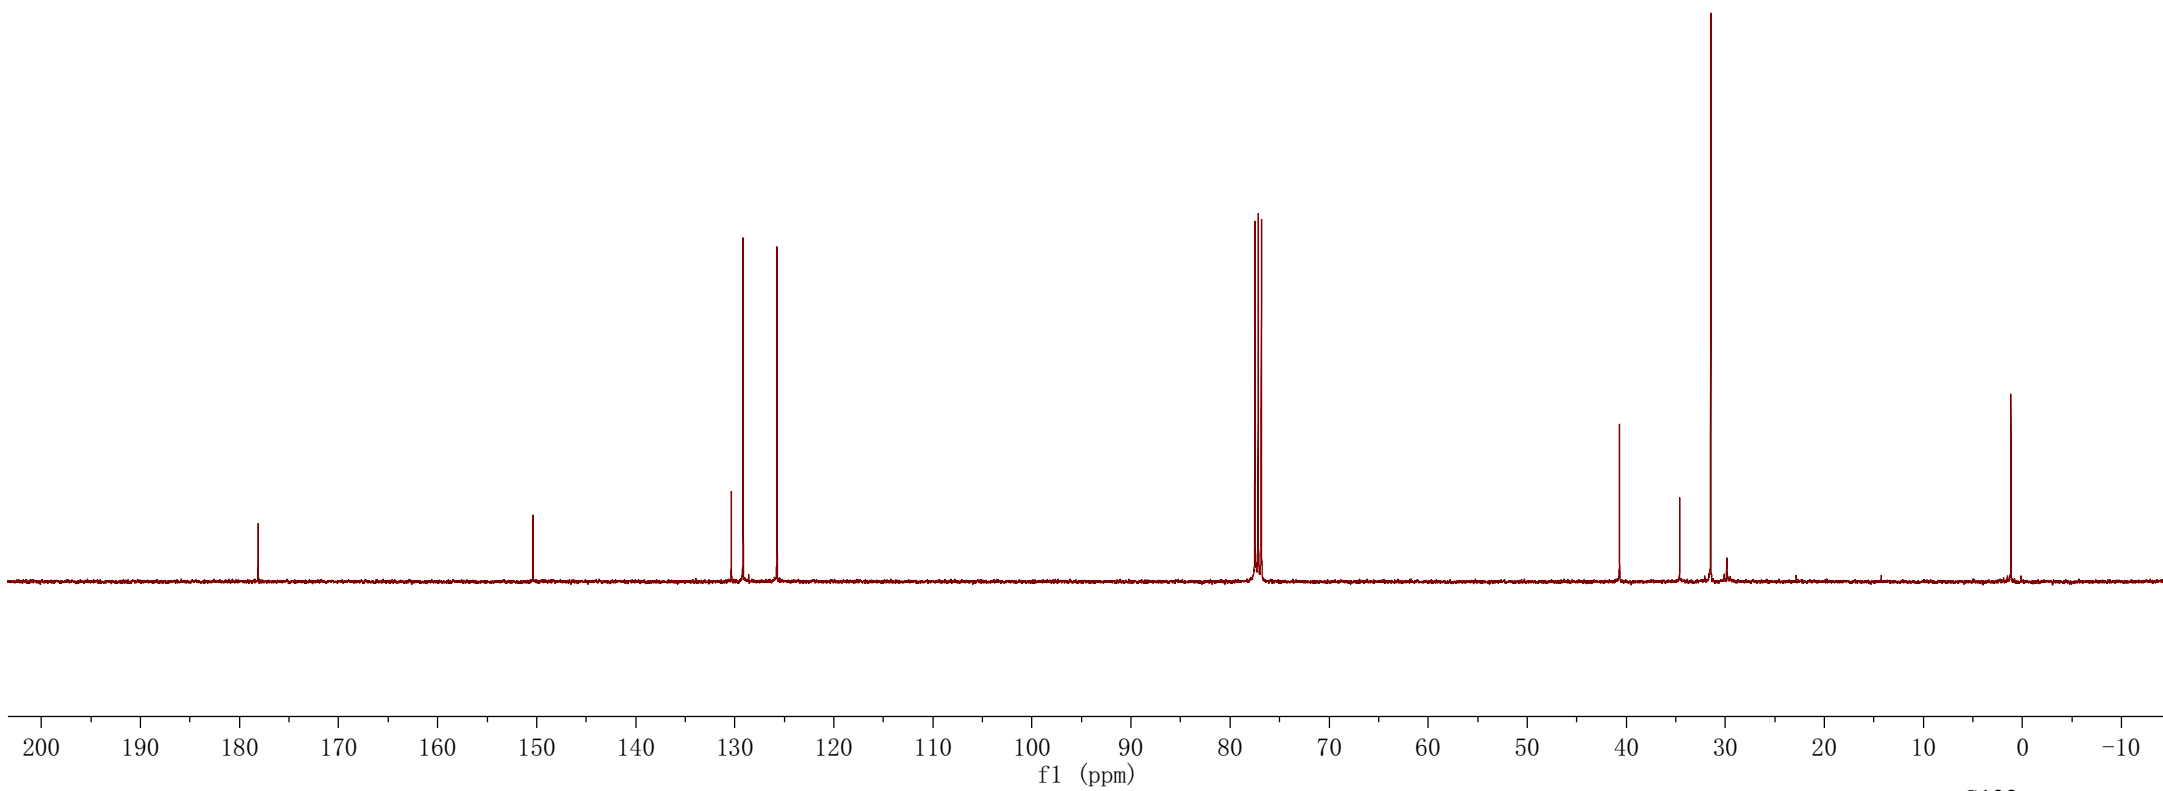

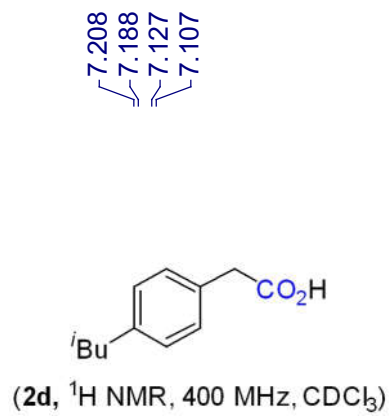

7.208  
7.188  
7.127  
7.107

3.624

2.473  
2.455  
1.926  
1.909  
1.893  
1.876  
1.859  
1.842  
1.825  
1.808

0.917  
0.900

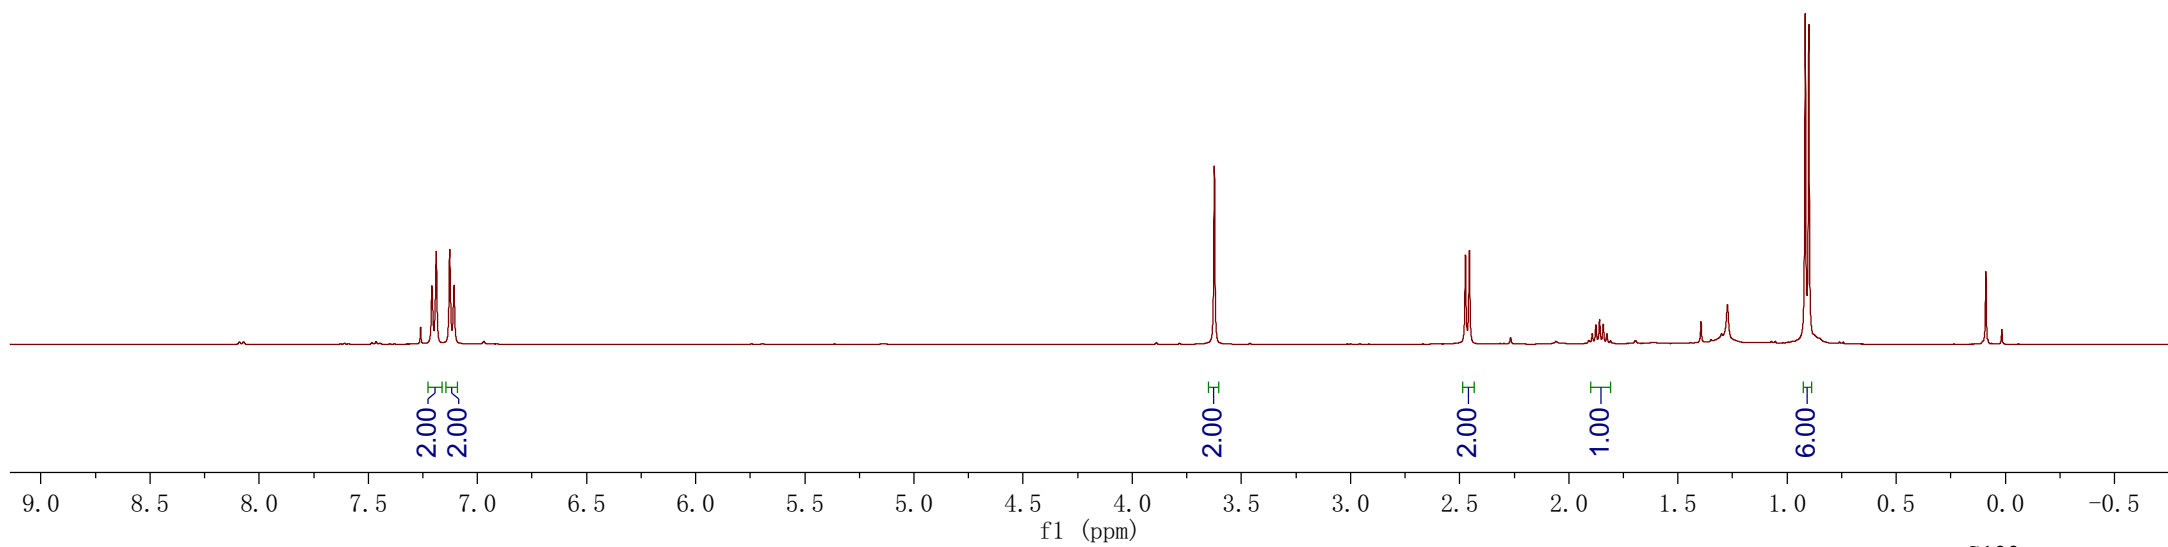

—178.240

—140.948

130.621

129.529

129.211

—45.205

—40.843

—30.304

—22.510

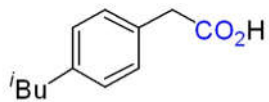

(2d, <sup>13</sup>C NMR, 100 MHz, CDCl<sub>3</sub>)

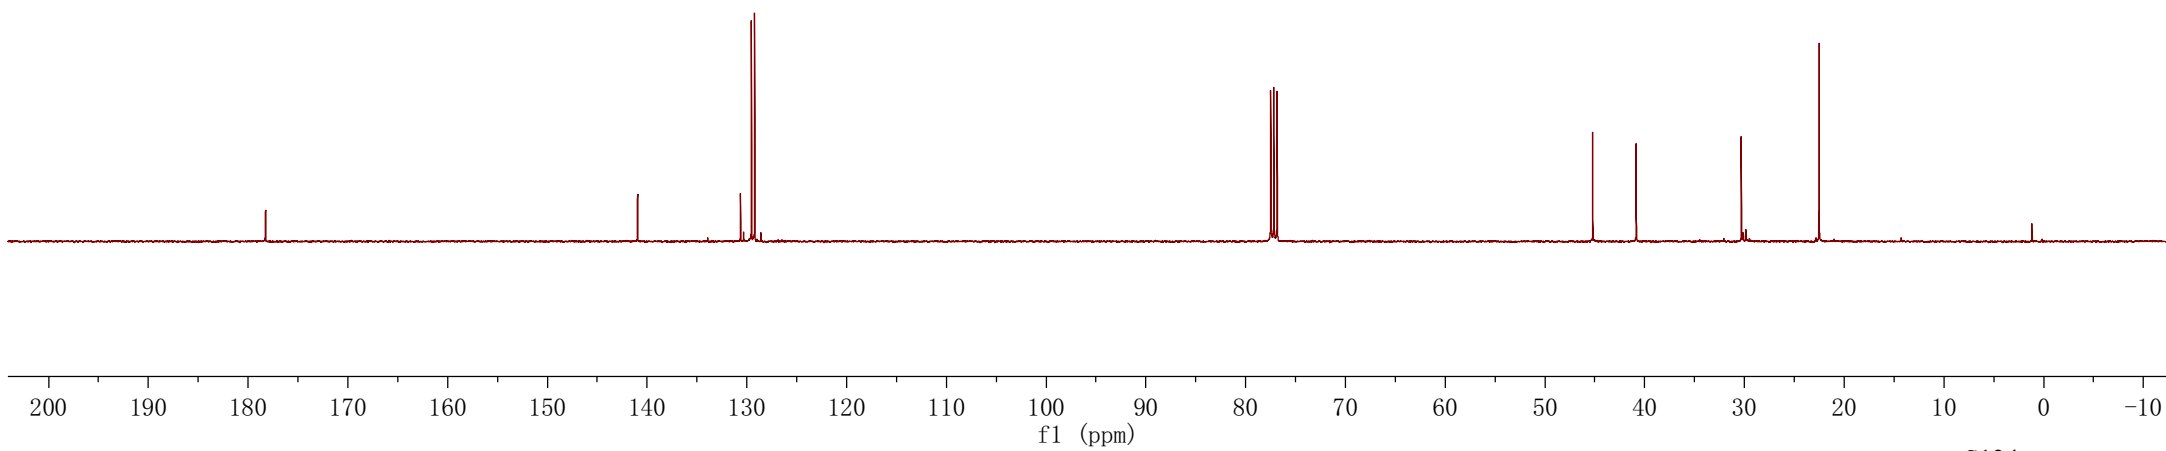

7.217  
7.195  
6.888  
6.867

3.802  
3.593

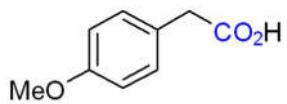

(2e, <sup>1</sup>H NMR, 400 MHz, CDCl<sub>3</sub>)

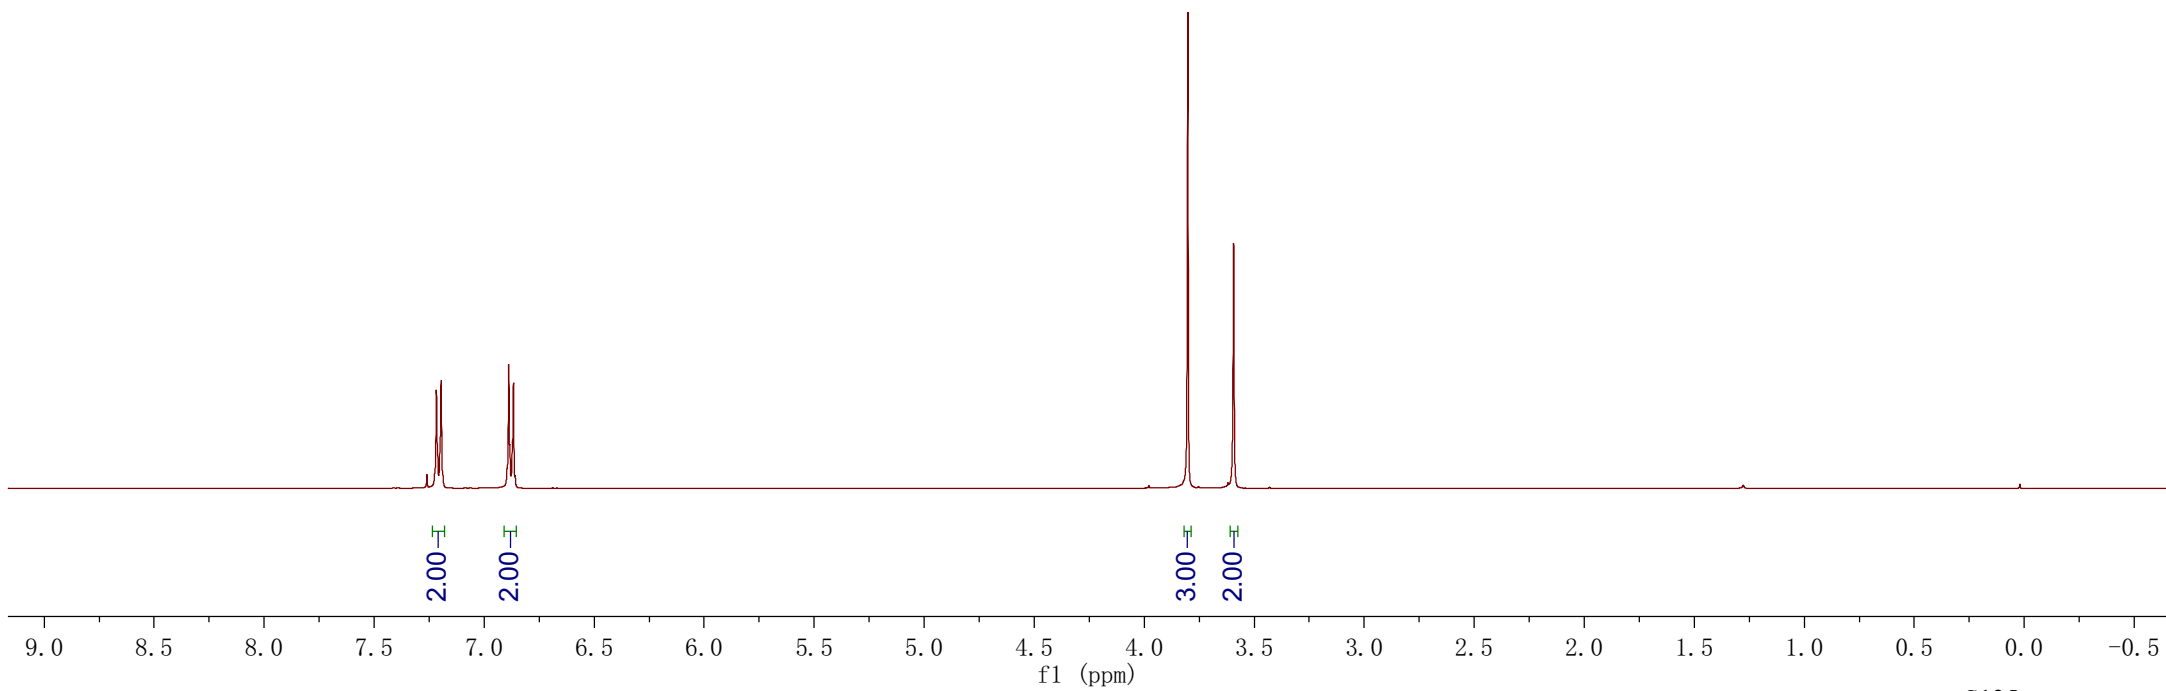

—178.378

—159.004

—130.538

—125.482

—114.225

—55.384

—40.282

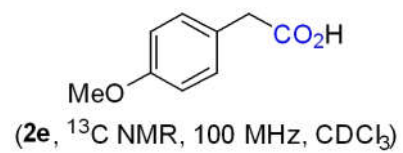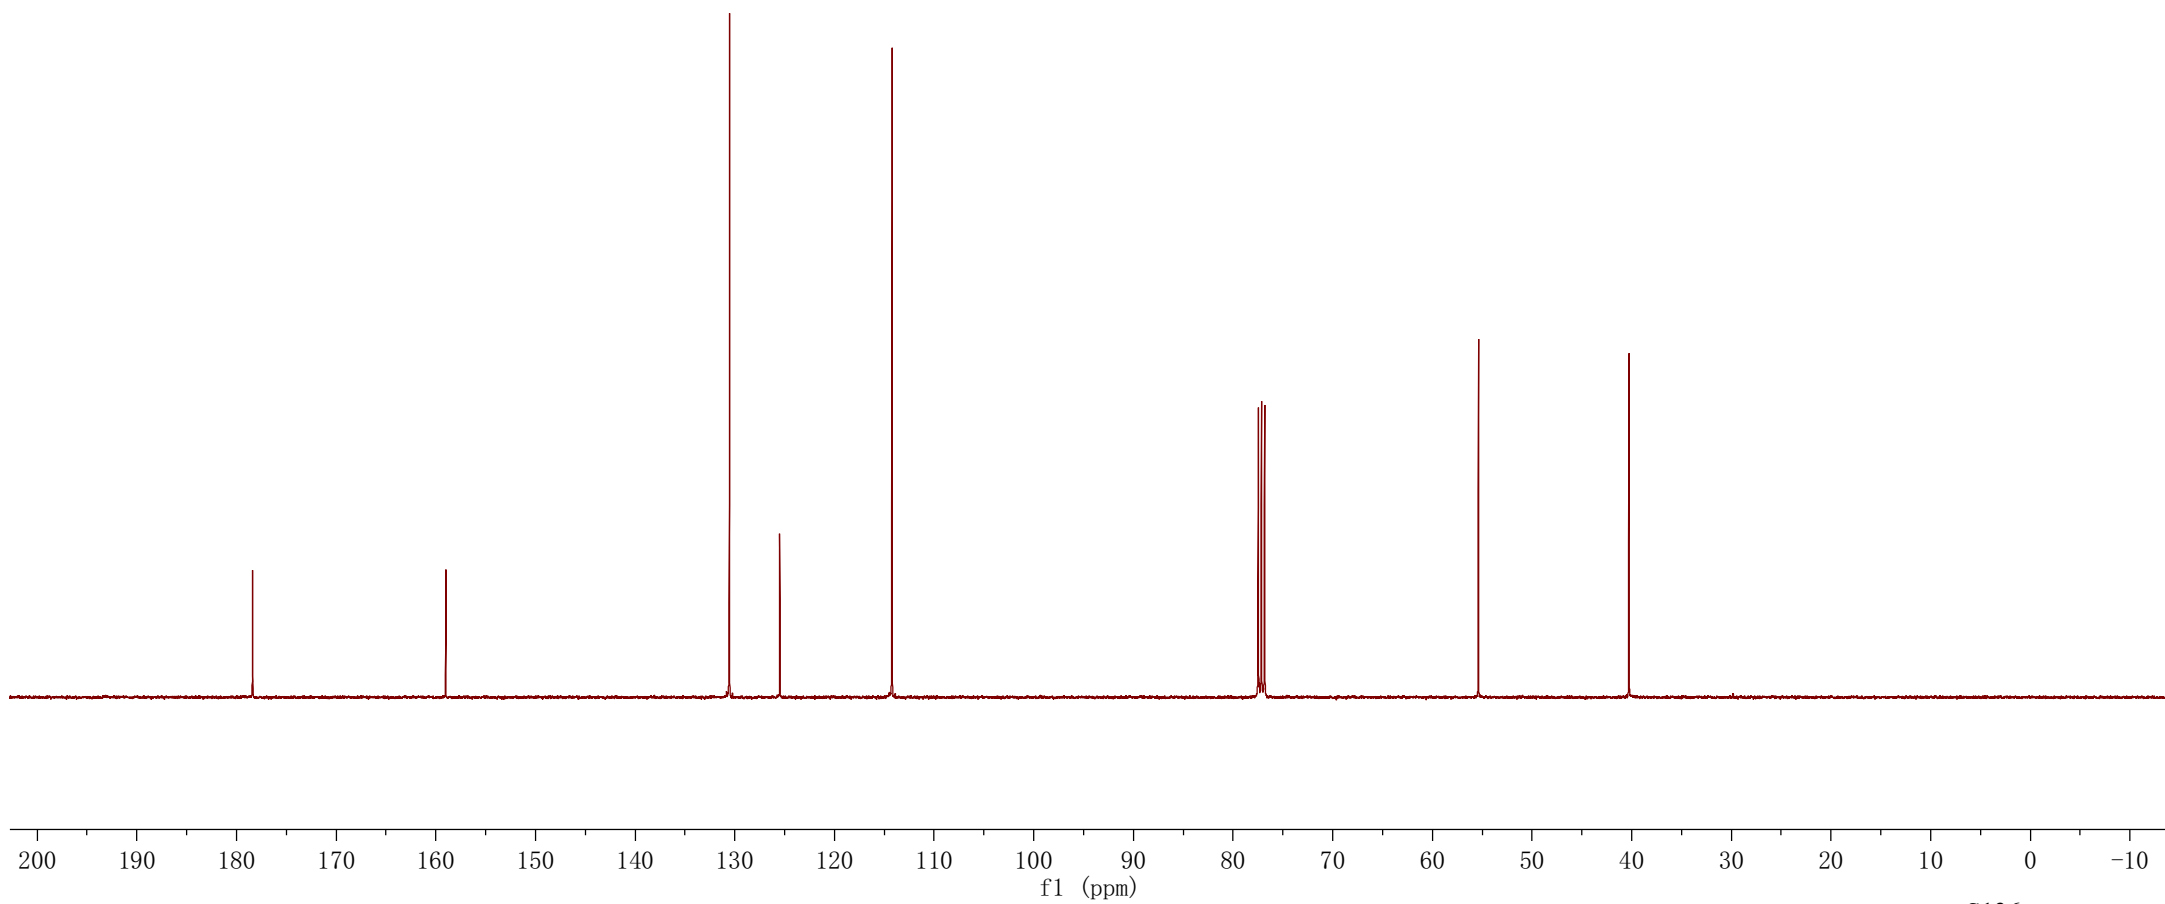



7.260  
7.251  
7.243  
7.230  
7.042  
7.021  
6.999

3.625

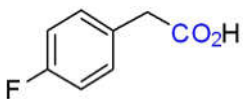

(2f,  $^1\text{H}$  NMR, 400 MHz,  $\text{CDCl}_3$ )

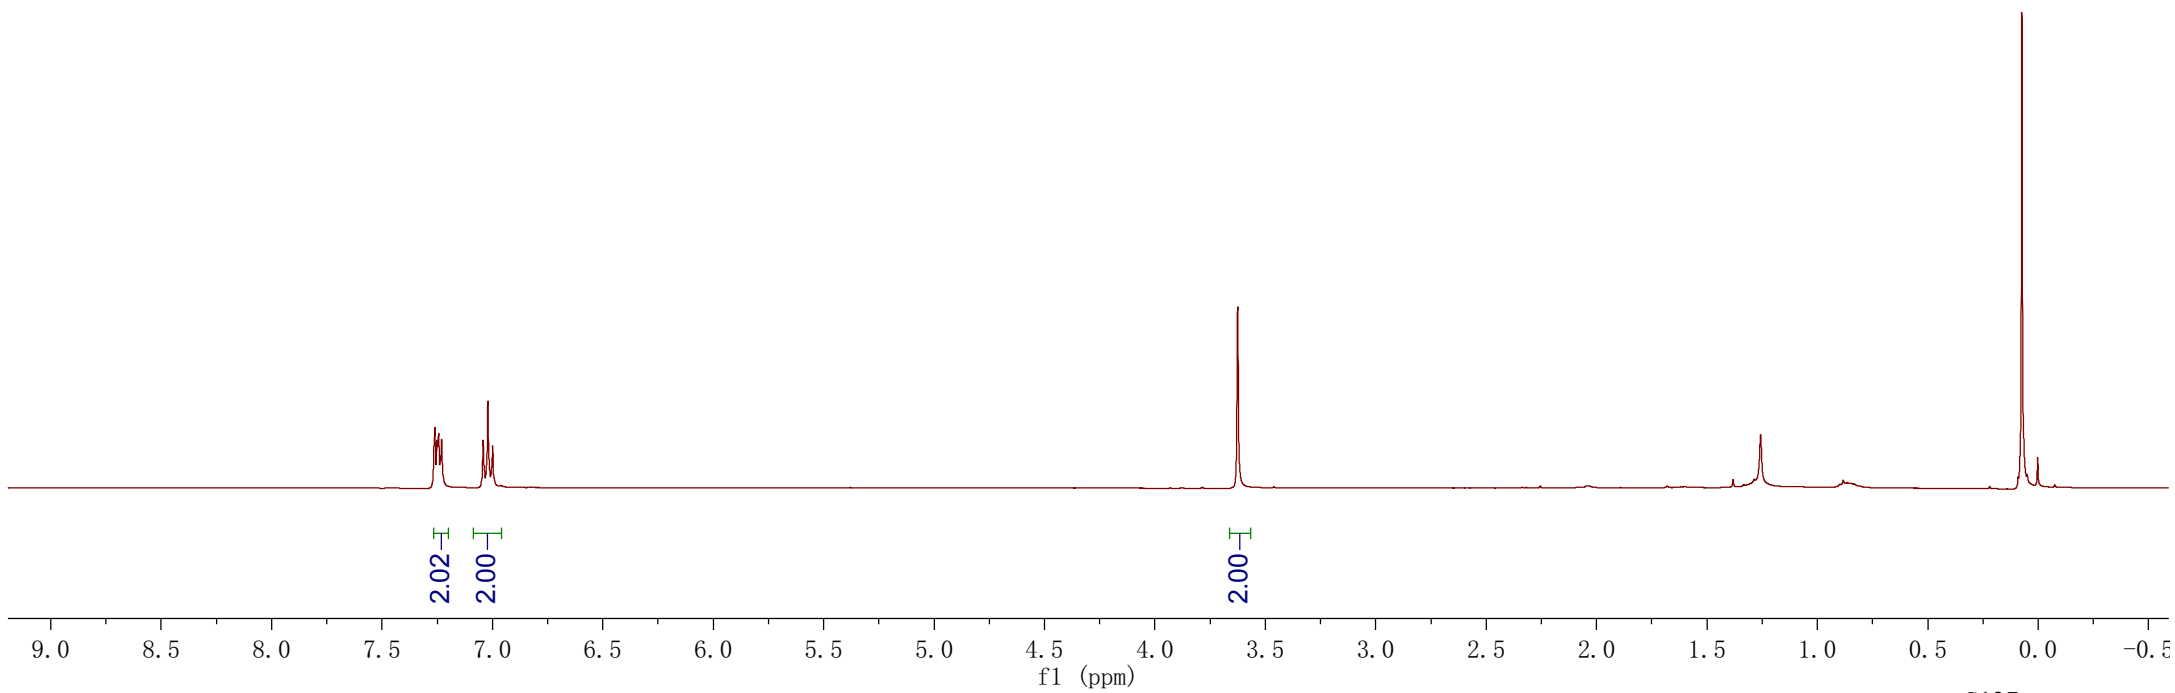

—177.419

—163.537  
—161.092

131.144  
131.064  
129.113  
129.079

115.790  
115.577

—40.253

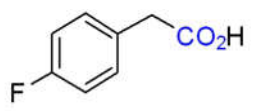

(2f, <sup>13</sup>C NMR, 100 MHz, CDCl<sub>3</sub>)

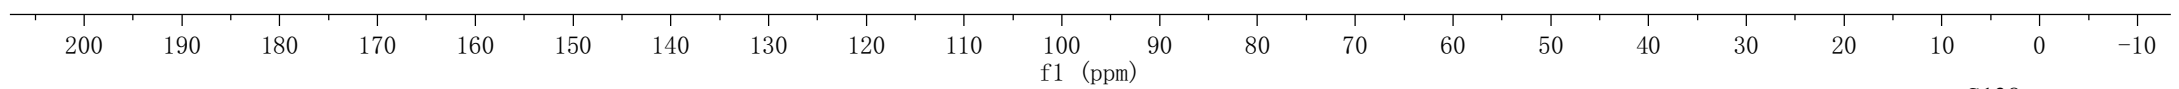

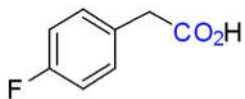

(2f,  $^{19}\text{F}$  NMR, 376 MHz,  $\text{CDCl}_3$ )

---120.005

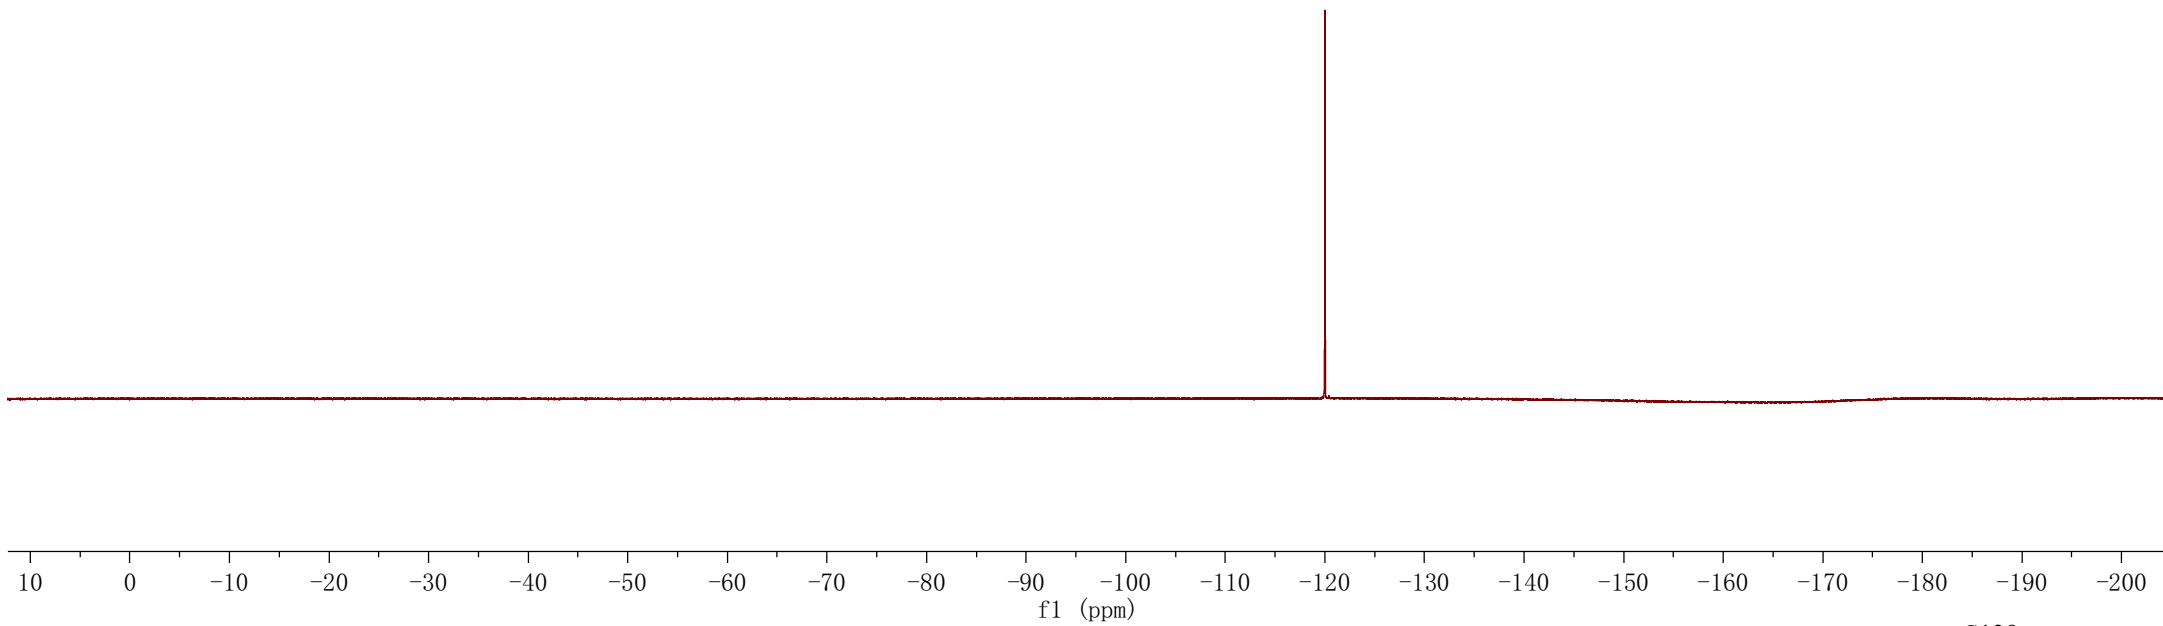

7.318  
7.297  
7.224  
7.203

3.622

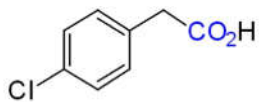

(2g,  $^1\text{H}$  NMR, 400 MHz,  $\text{CDCl}_3$ )

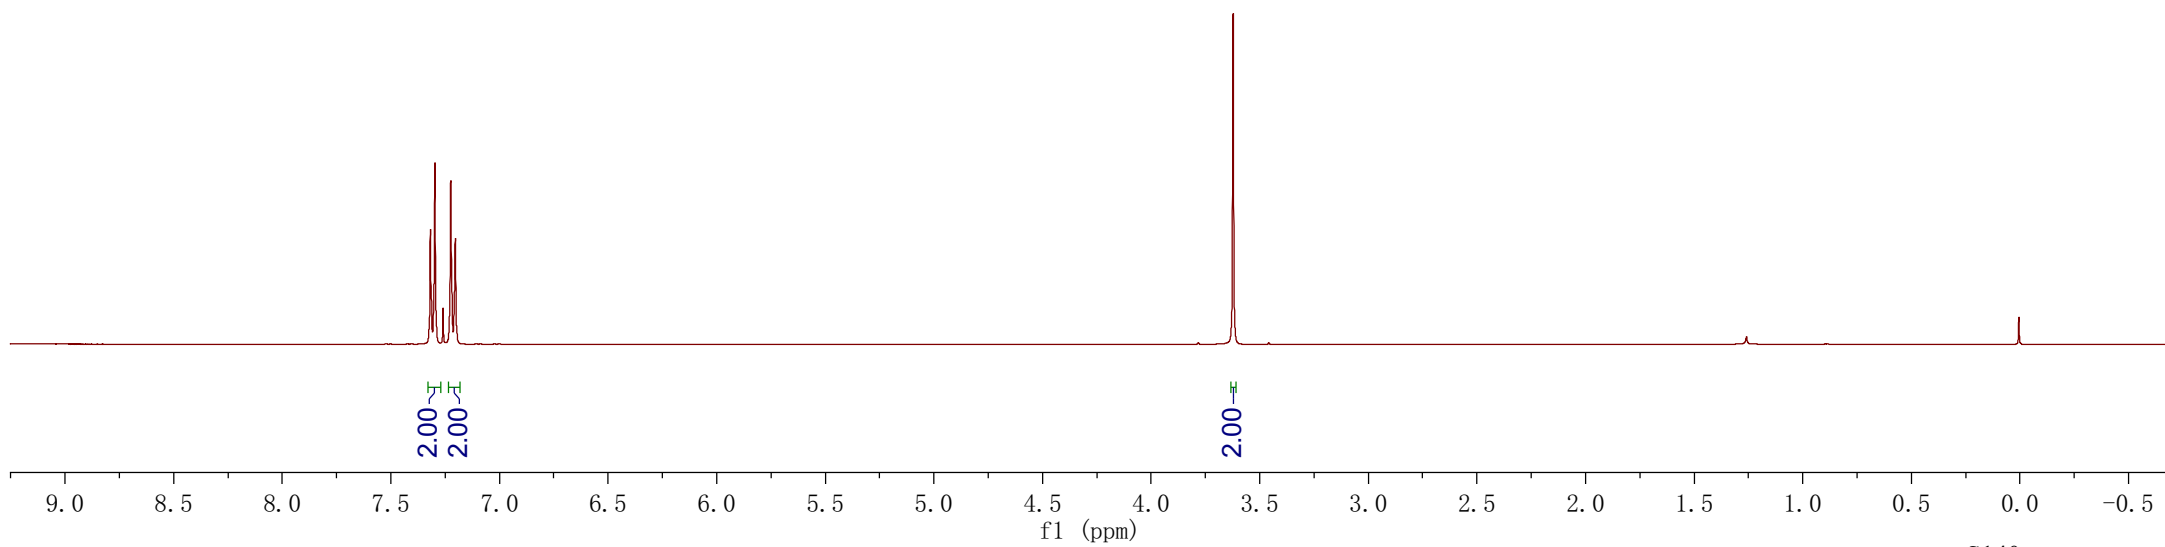

—177.558

133.551  
131.745  
130.887  
128.952

—40.442

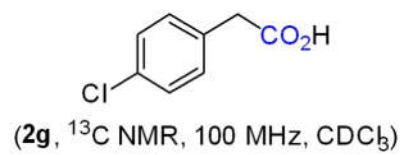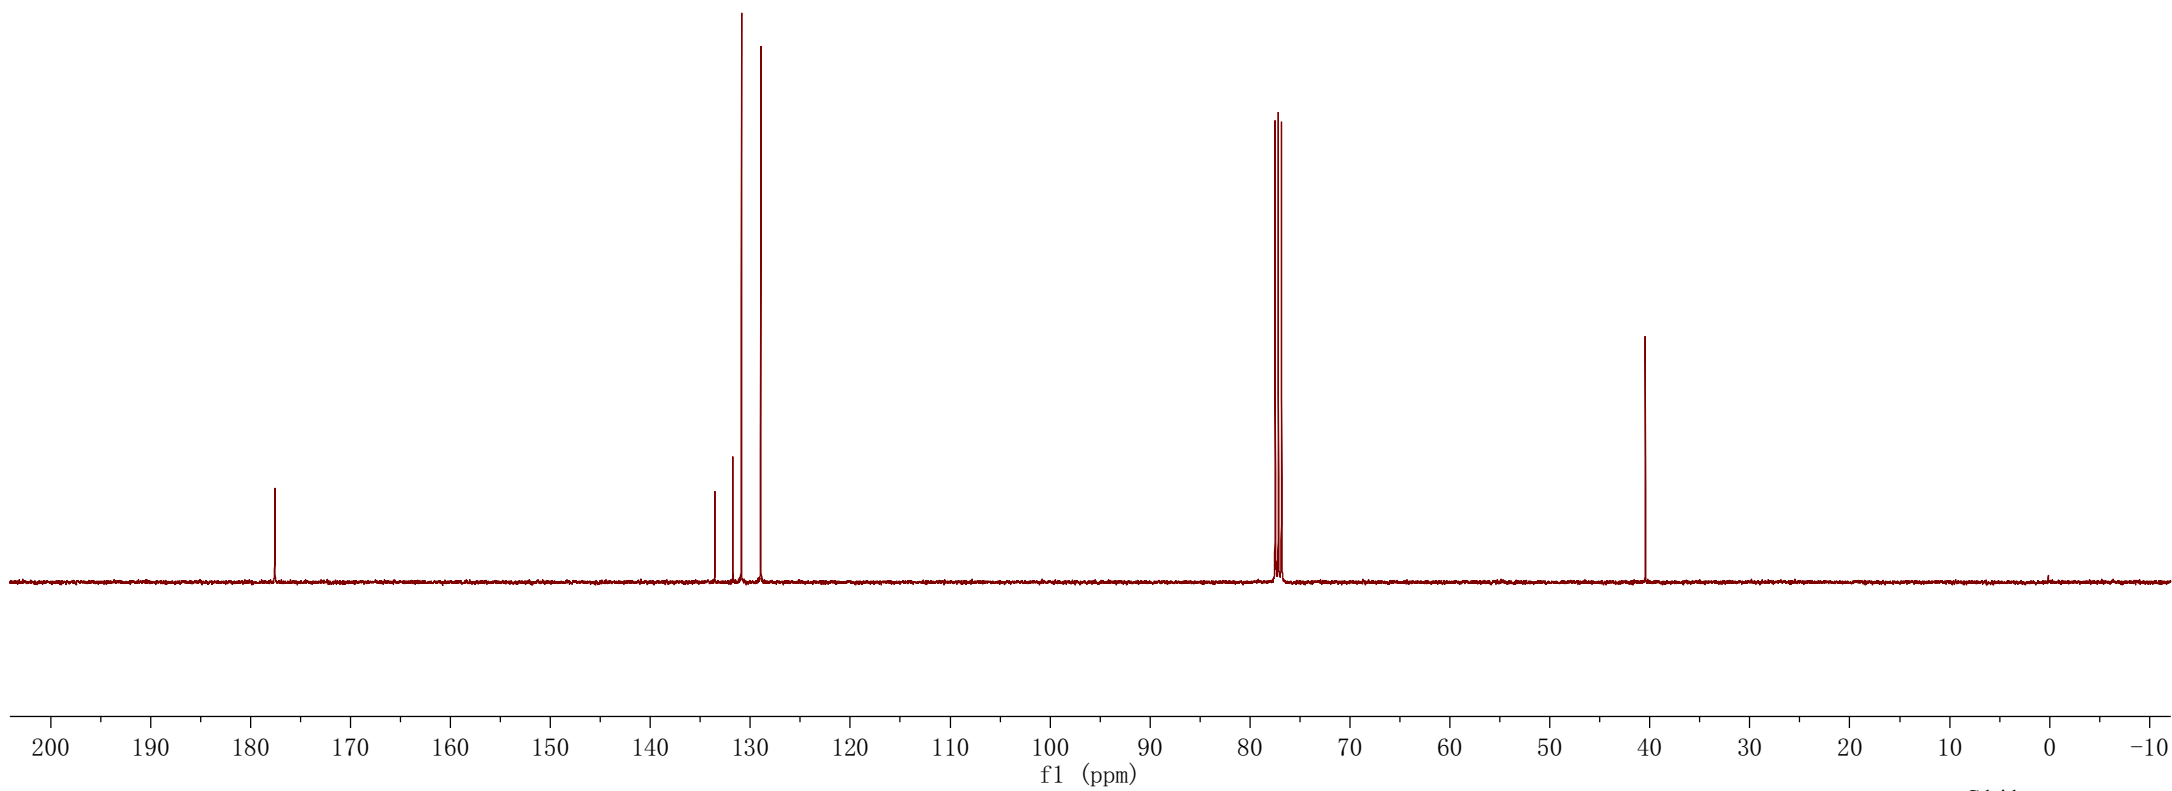

7.471  
7.450  
7.167  
7.146

3.605

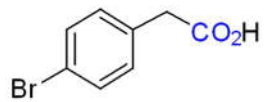

(2h,  $^1\text{H}$  NMR, 400 MHz,  $\text{CDCl}_3$ )

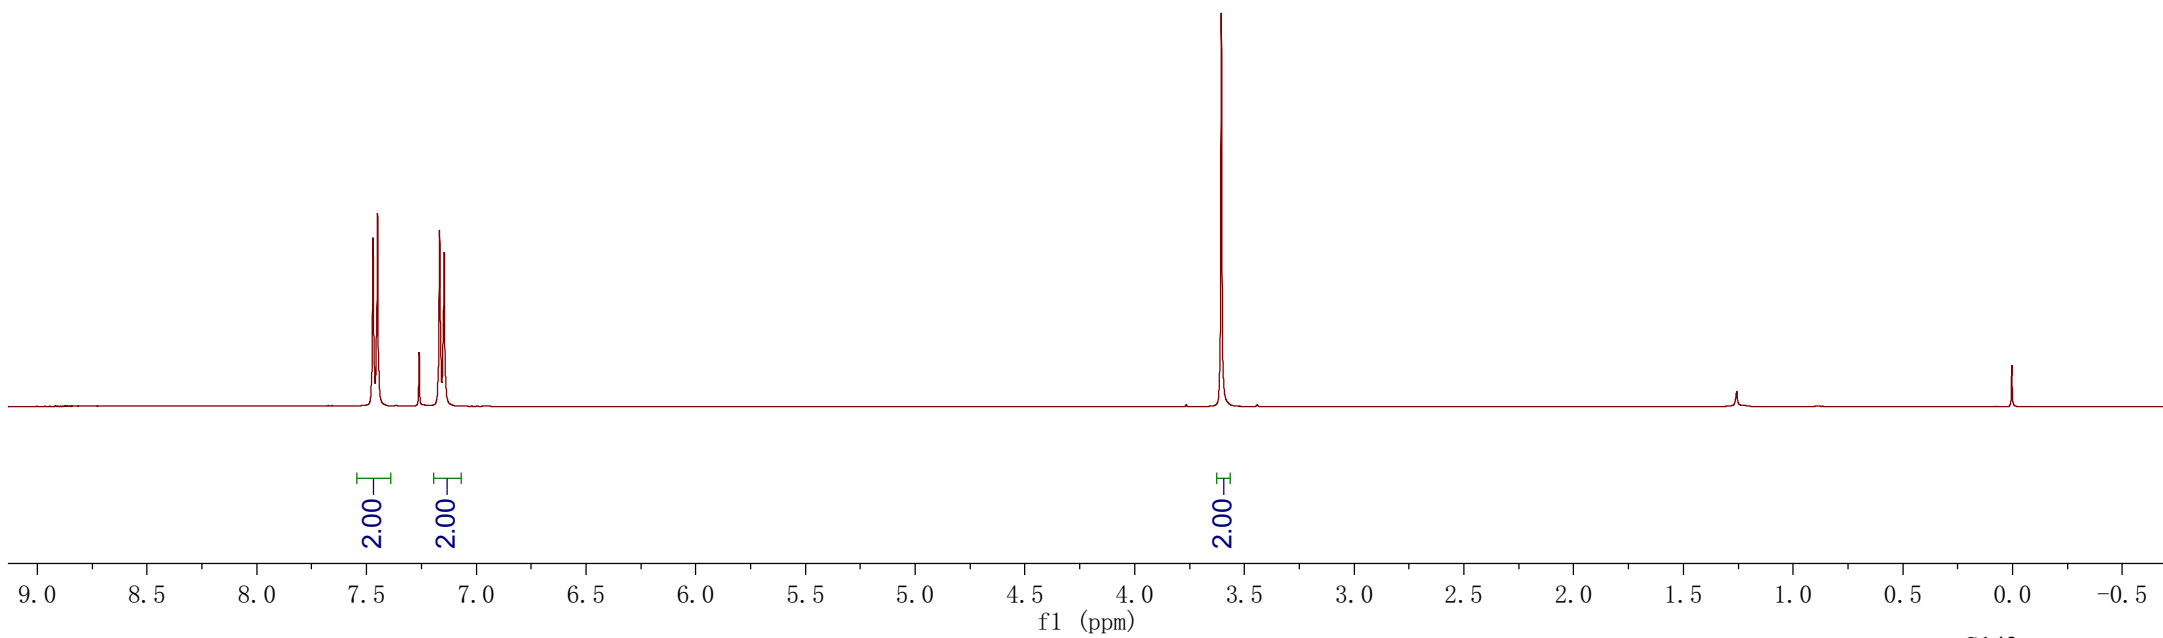

—177.307

132.270  
131.913  
131.244

—121.630

—40.501

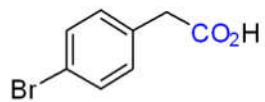

(2h,  $^{13}\text{C}$  NMR, 100 MHz,  $\text{CDCl}_3$ )

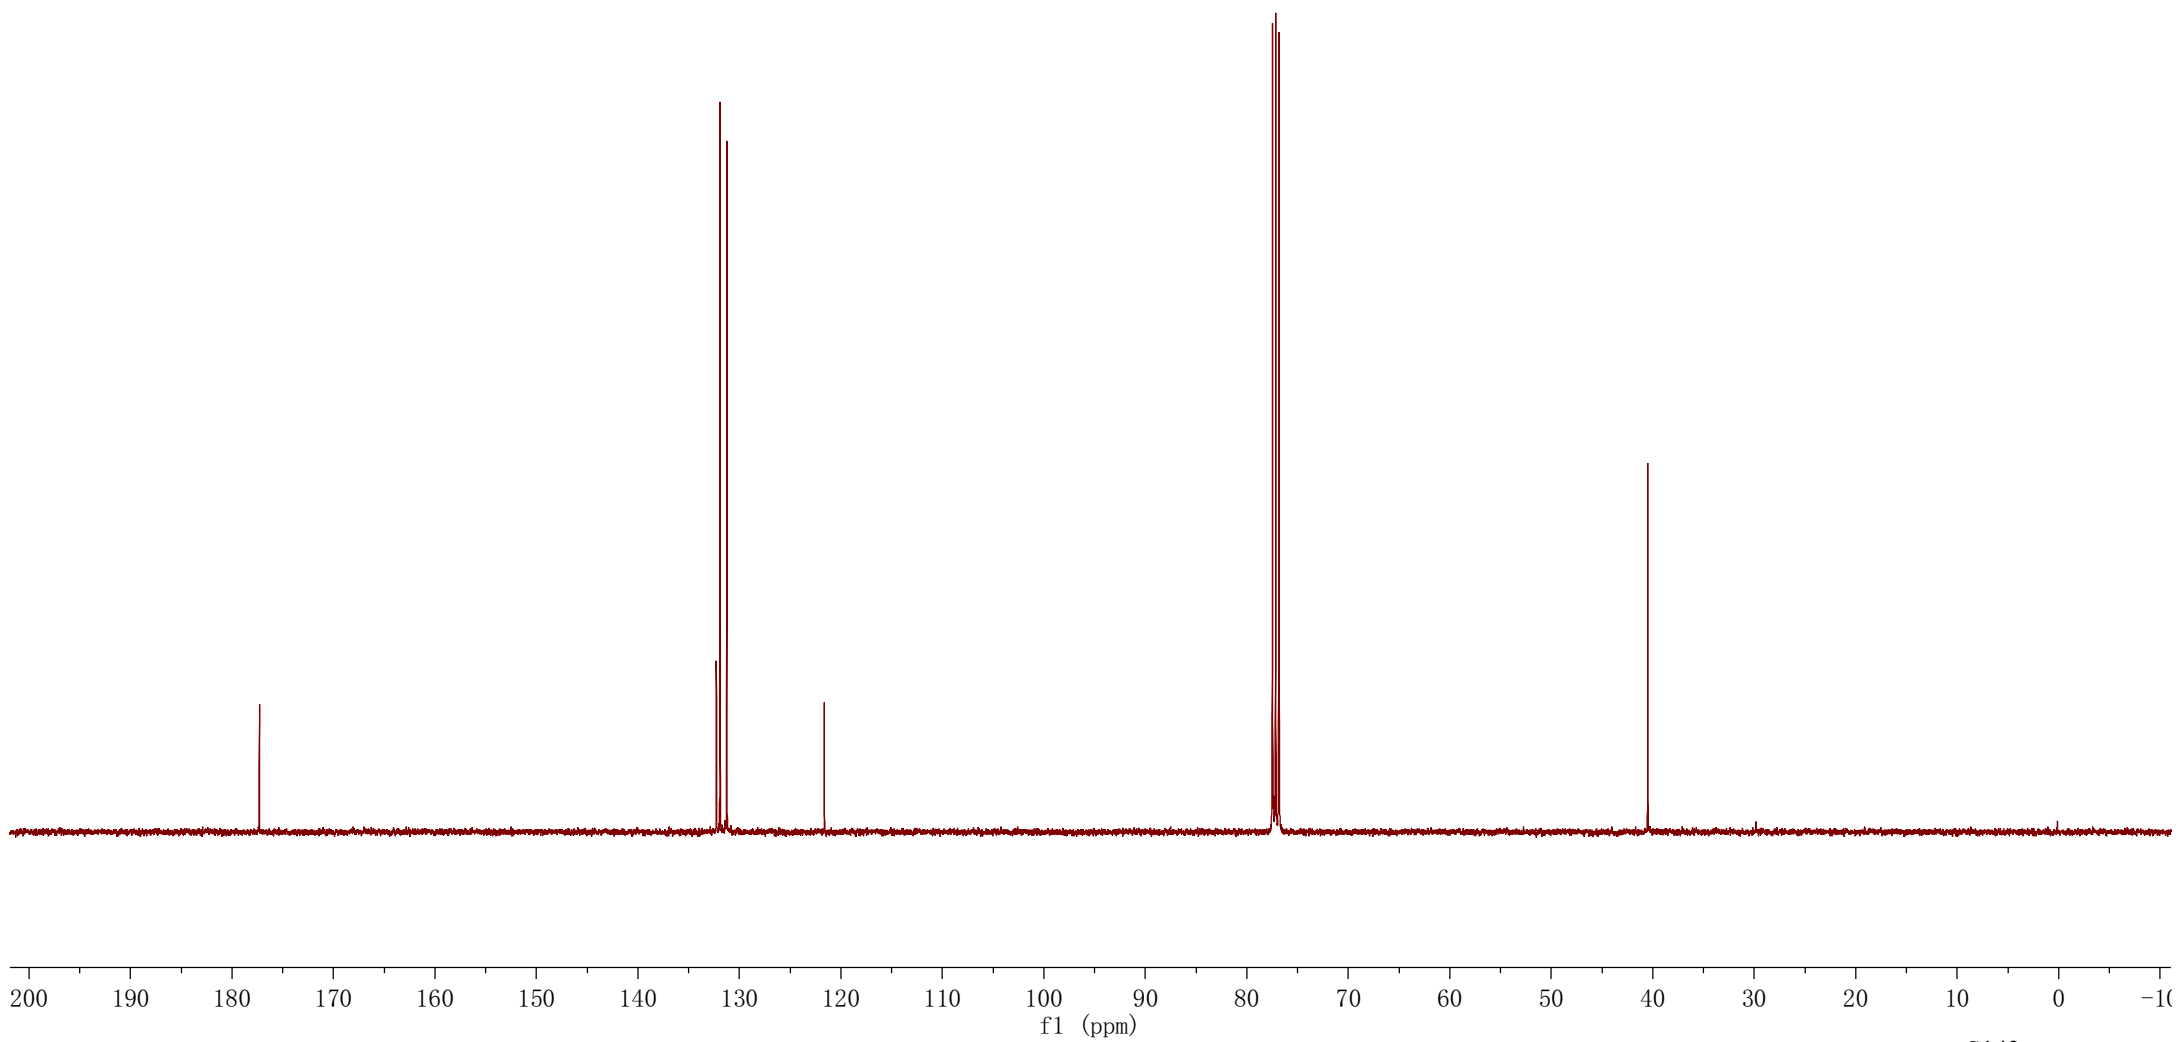

7.609  
7.591  
7.417  
7.399

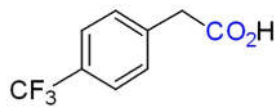

(2i, <sup>1</sup>H NMR, 400 MHz, CDCl<sub>3</sub>)

3.722

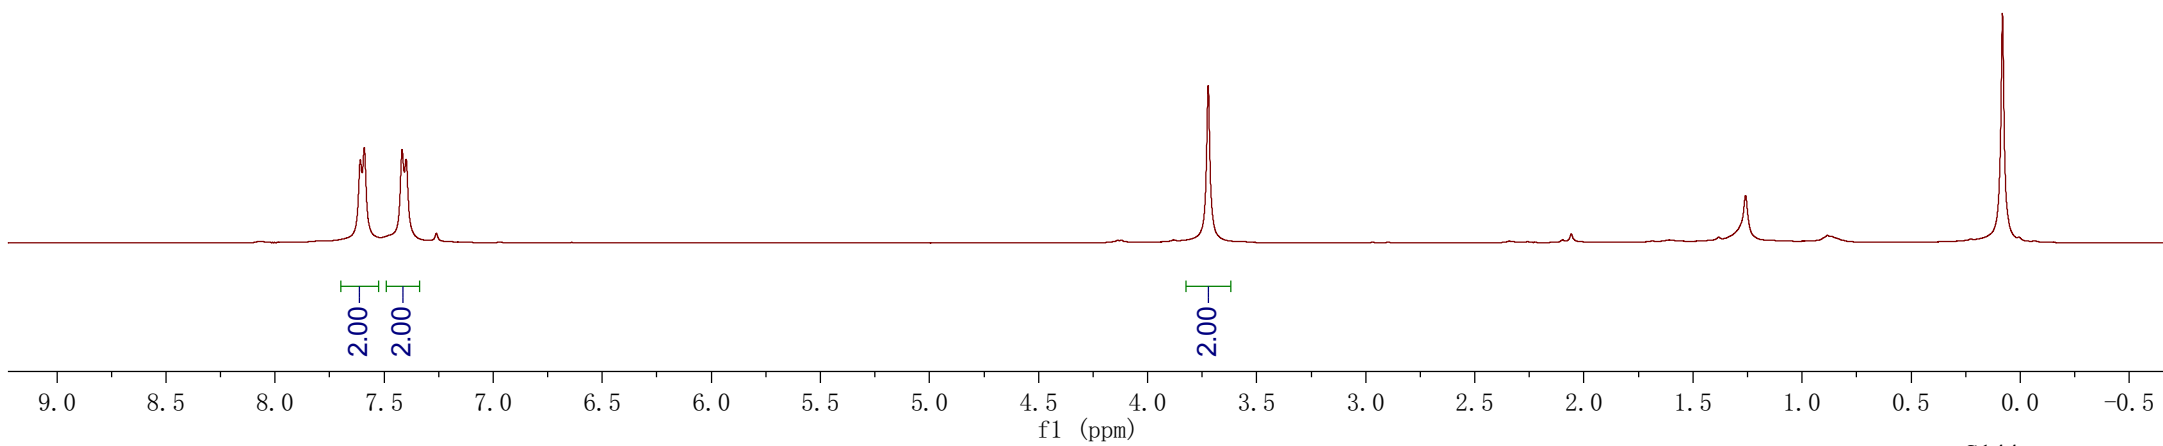



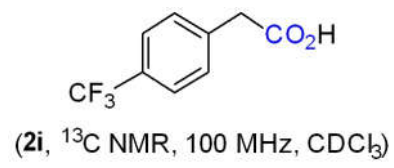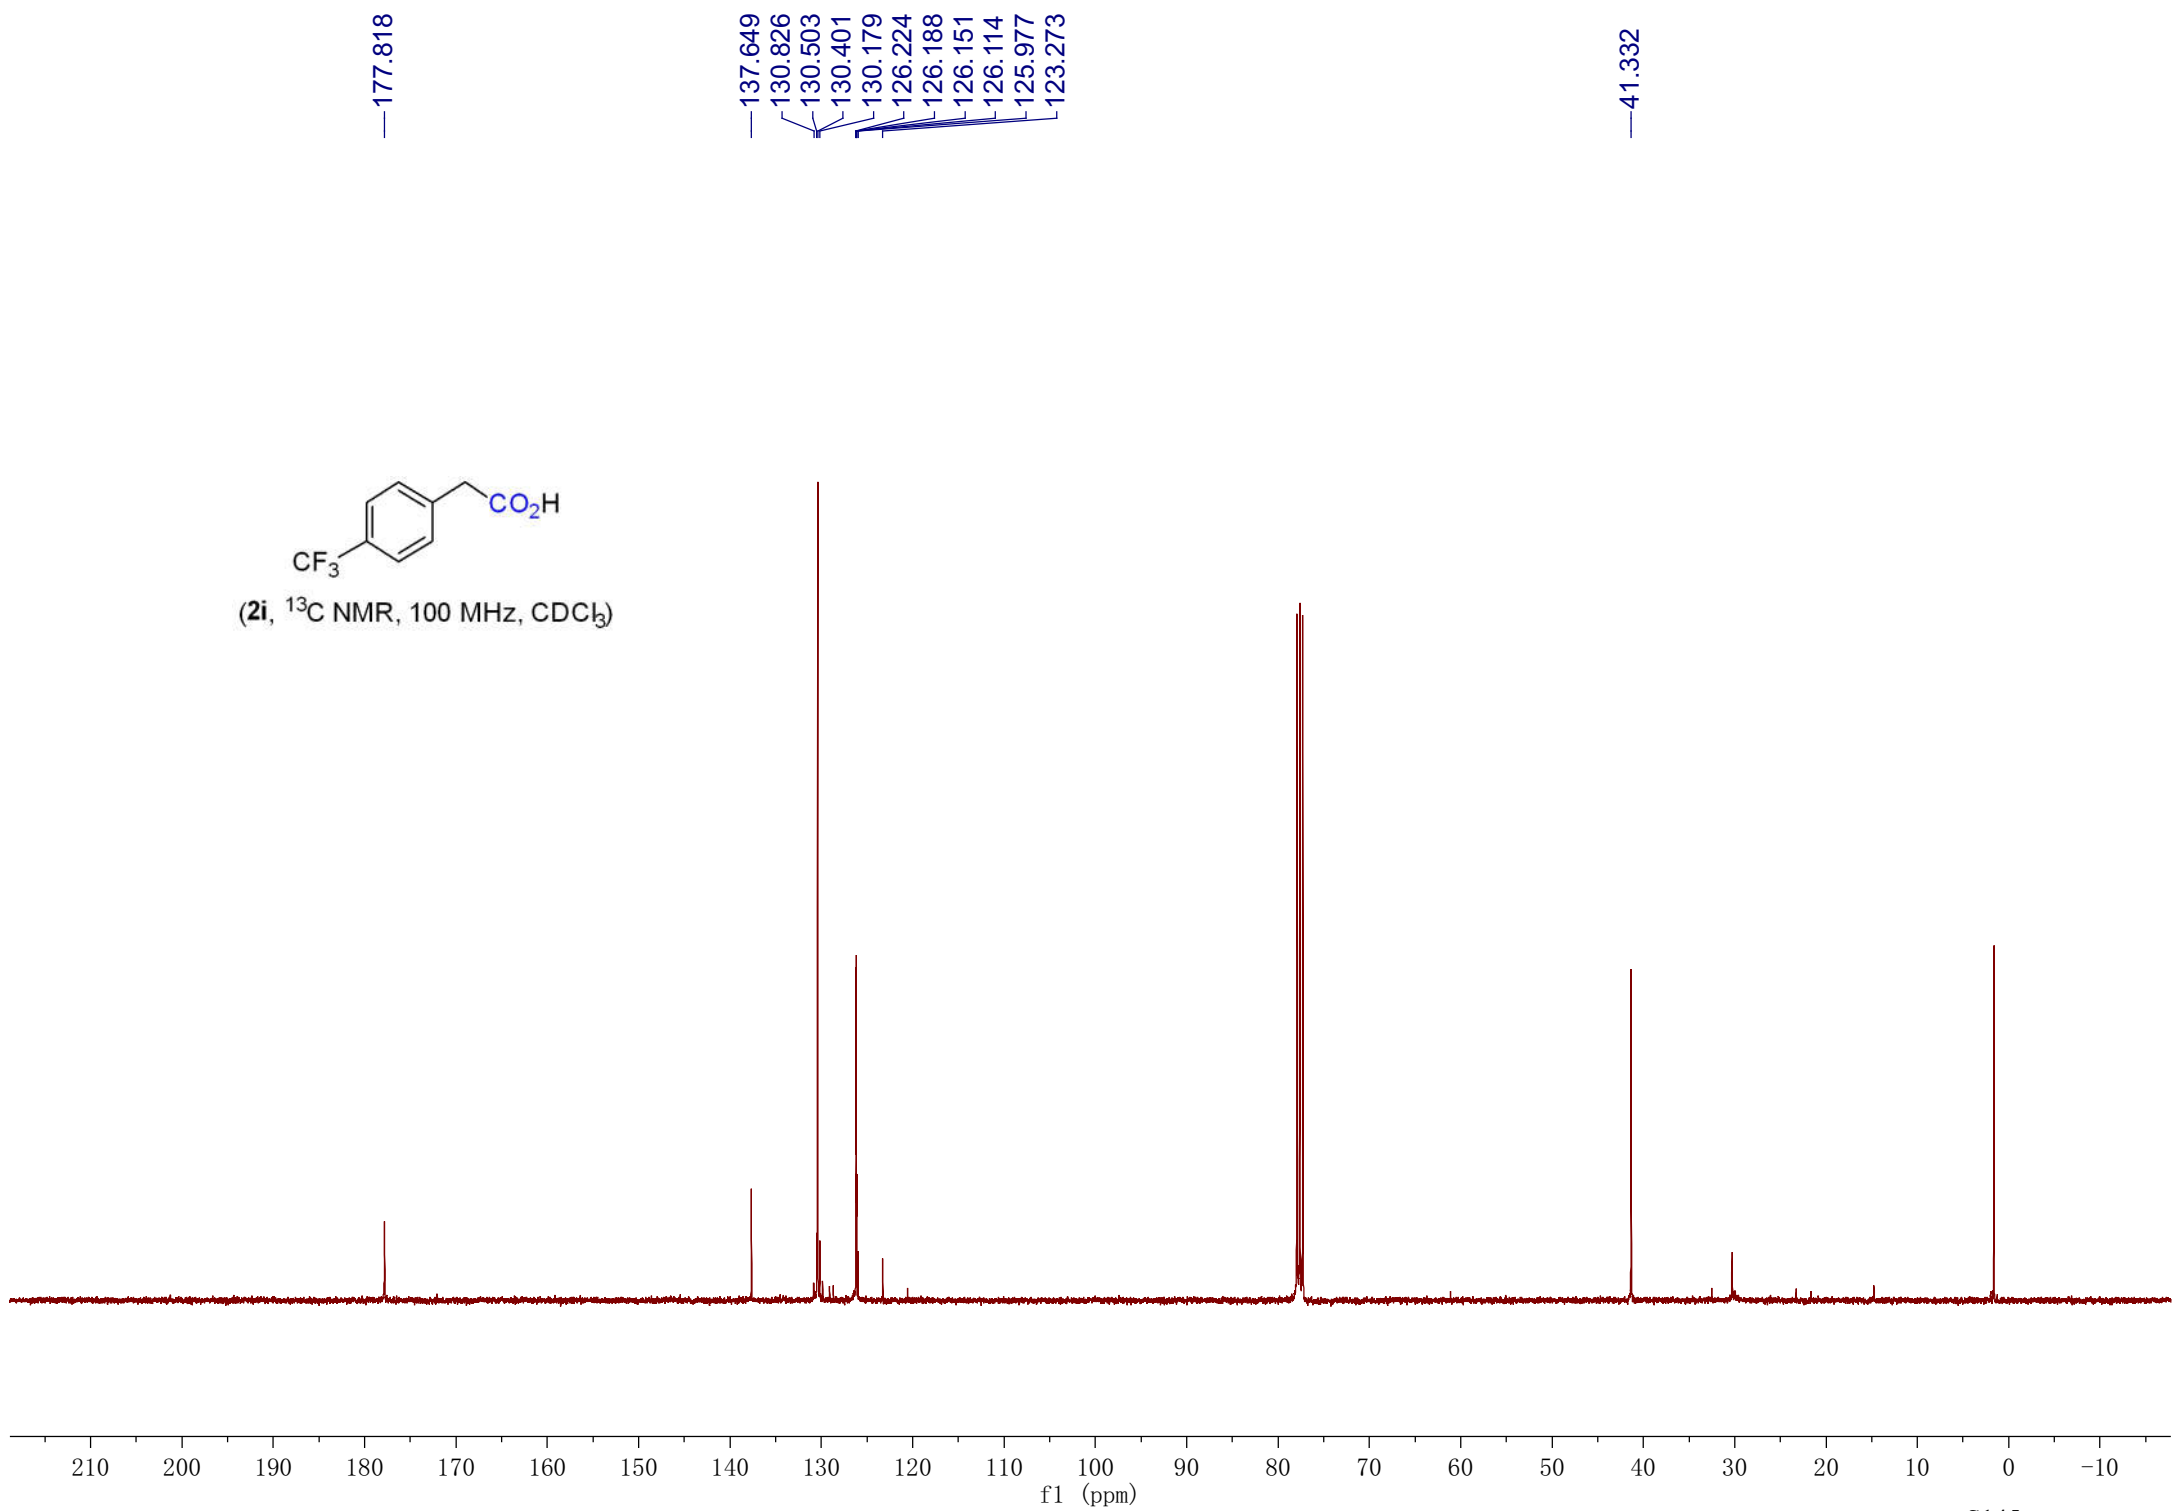

7.647  
7.626  
7.417  
7.397

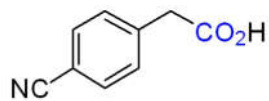

(2j, <sup>1</sup>H NMR, 400 MHz, CDCl<sub>3</sub>)

3.725

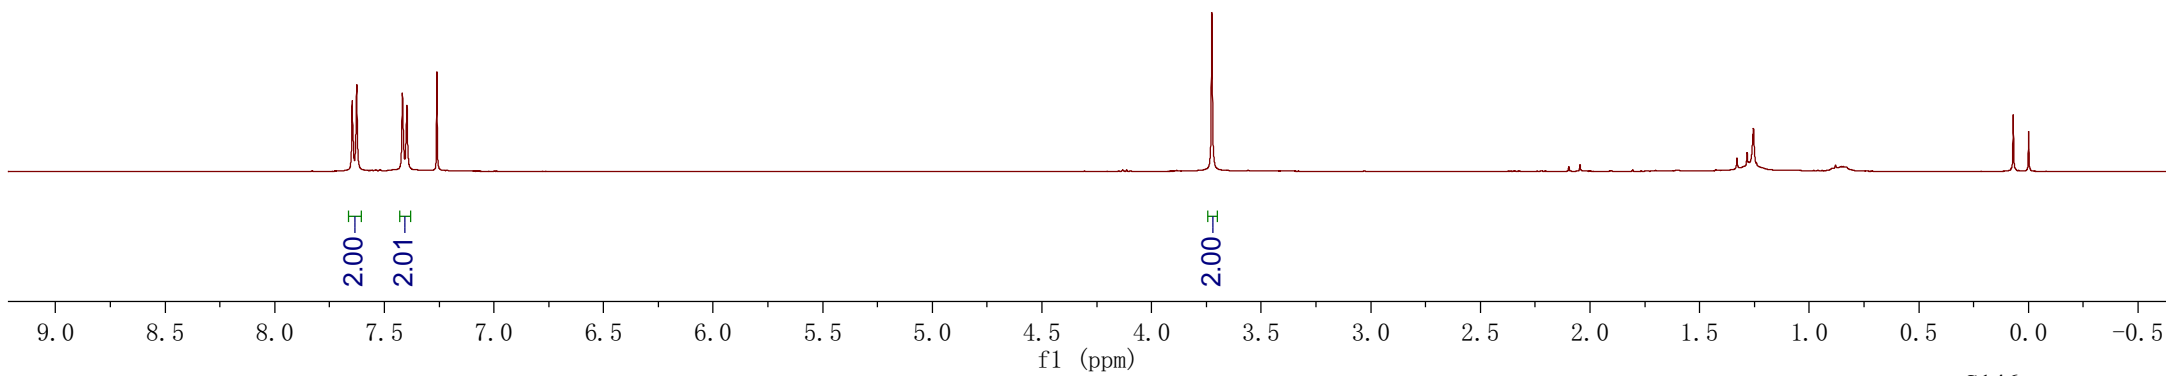

—174.973

—138.643

—132.561

—130.417

—118.670

—111.700

—40.885

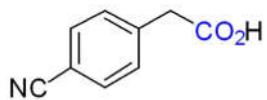

(2j, <sup>13</sup>C NMR, 100 MHz, CDCl<sub>3</sub>)

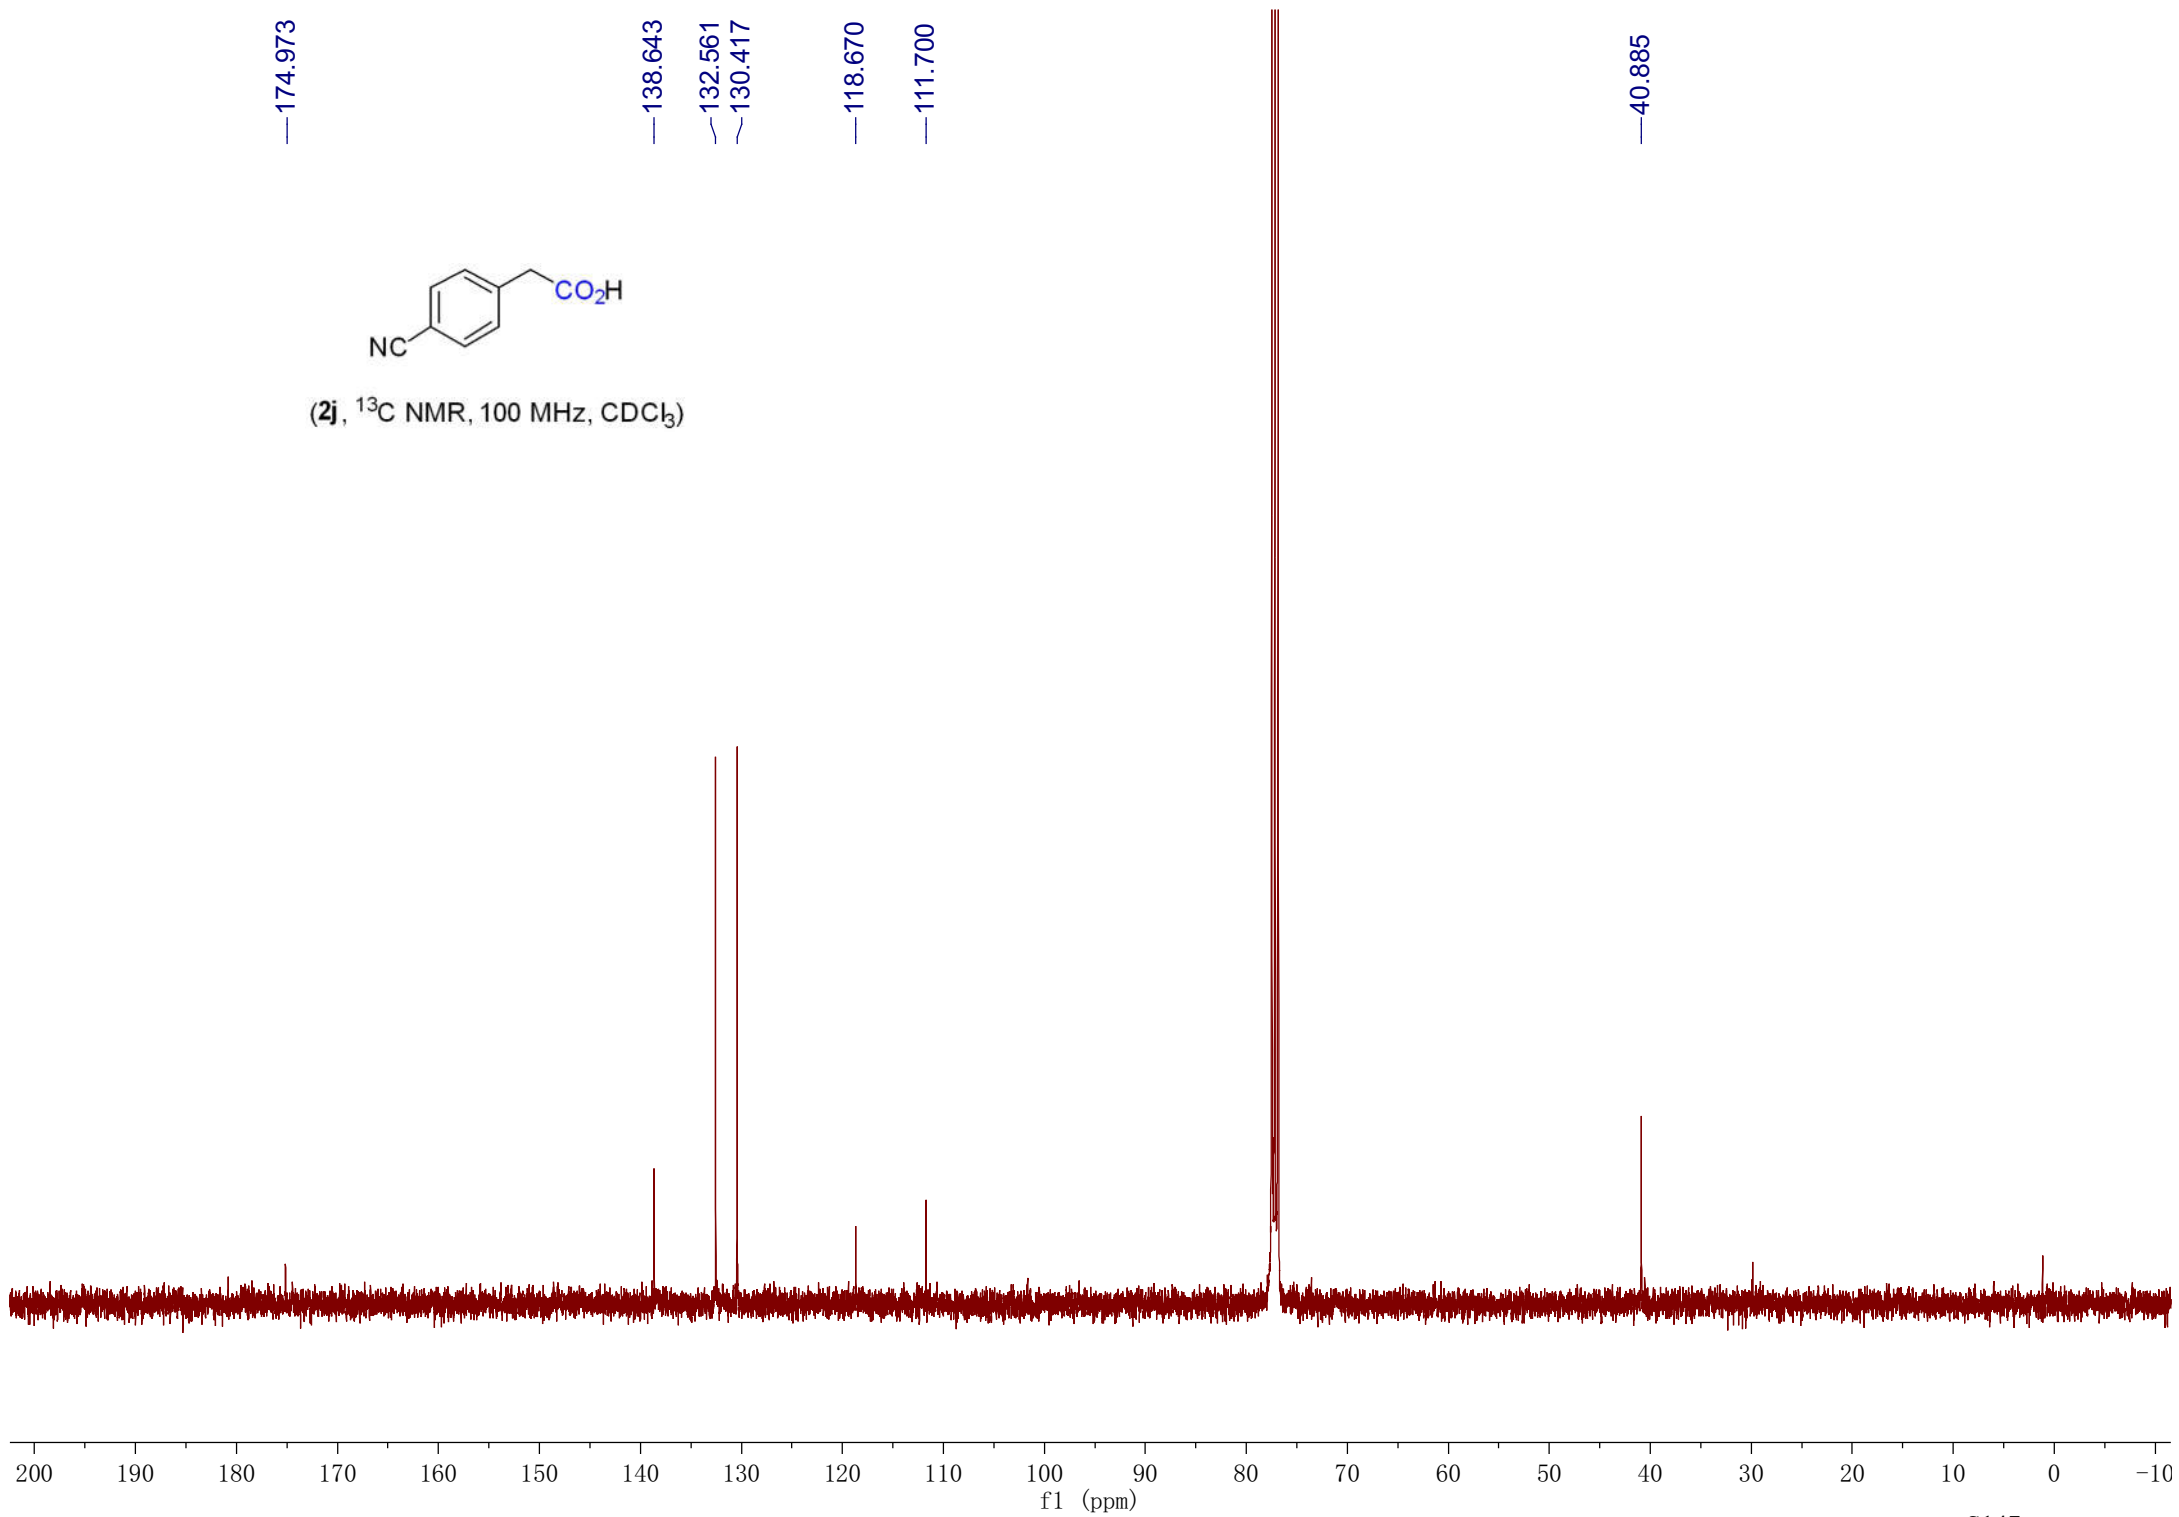

8.016  
7.995

7.369  
7.349

3.910  
3.710

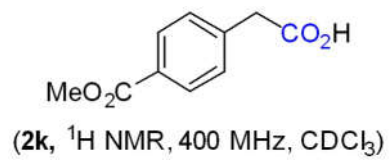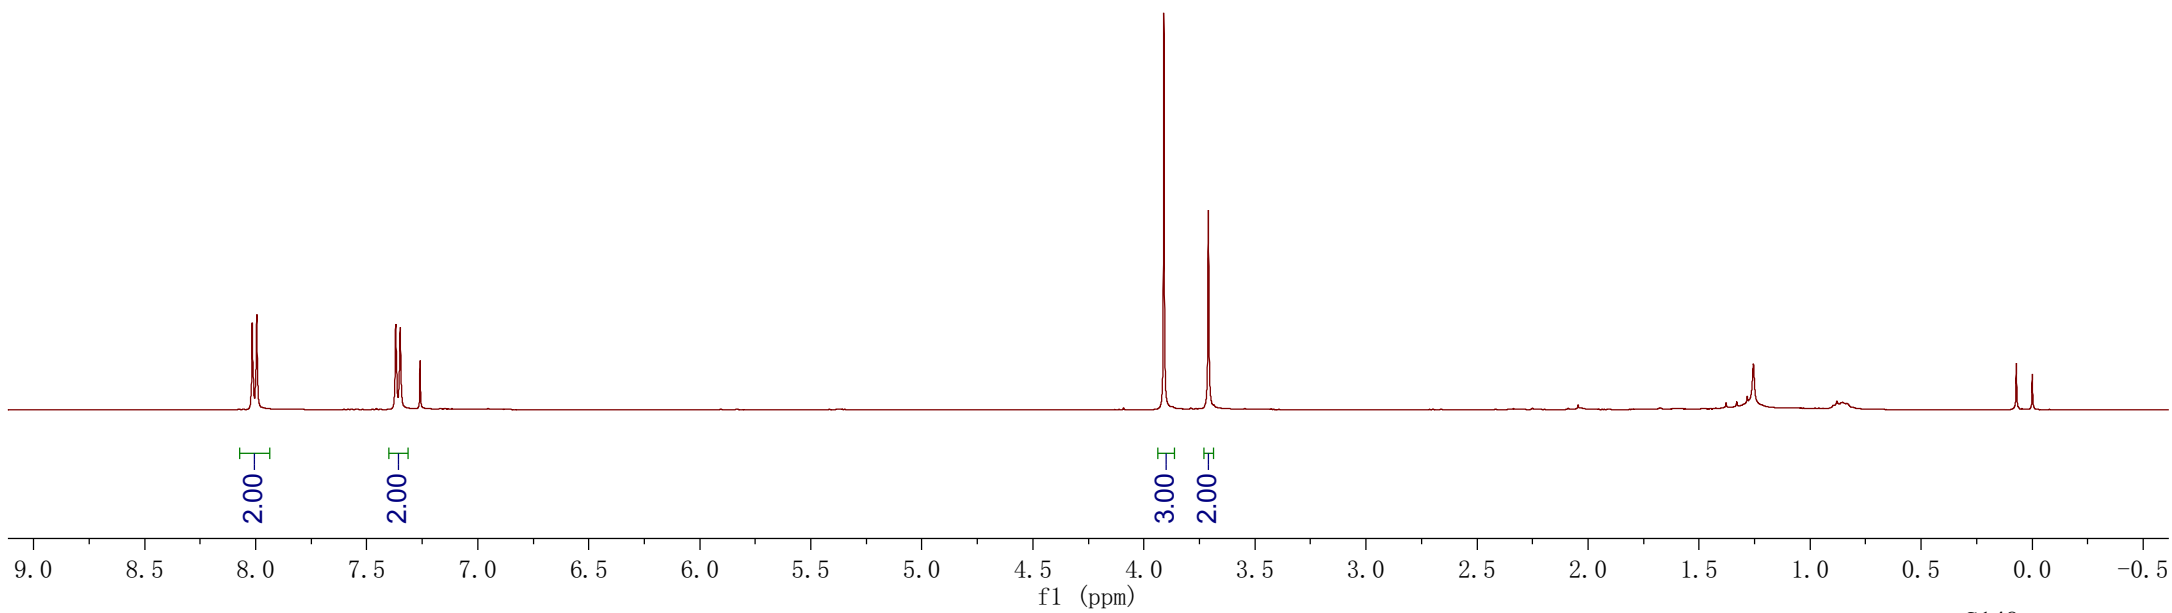

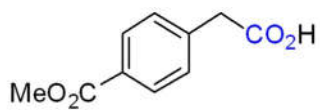

(2k,  $^{13}\text{C}$  NMR, 100 MHz,  $\text{CDCl}_3$ )

—176.502  
—166.973

—138.477  
—130.083  
—129.613  
—129.473

—52.283  
—41.024

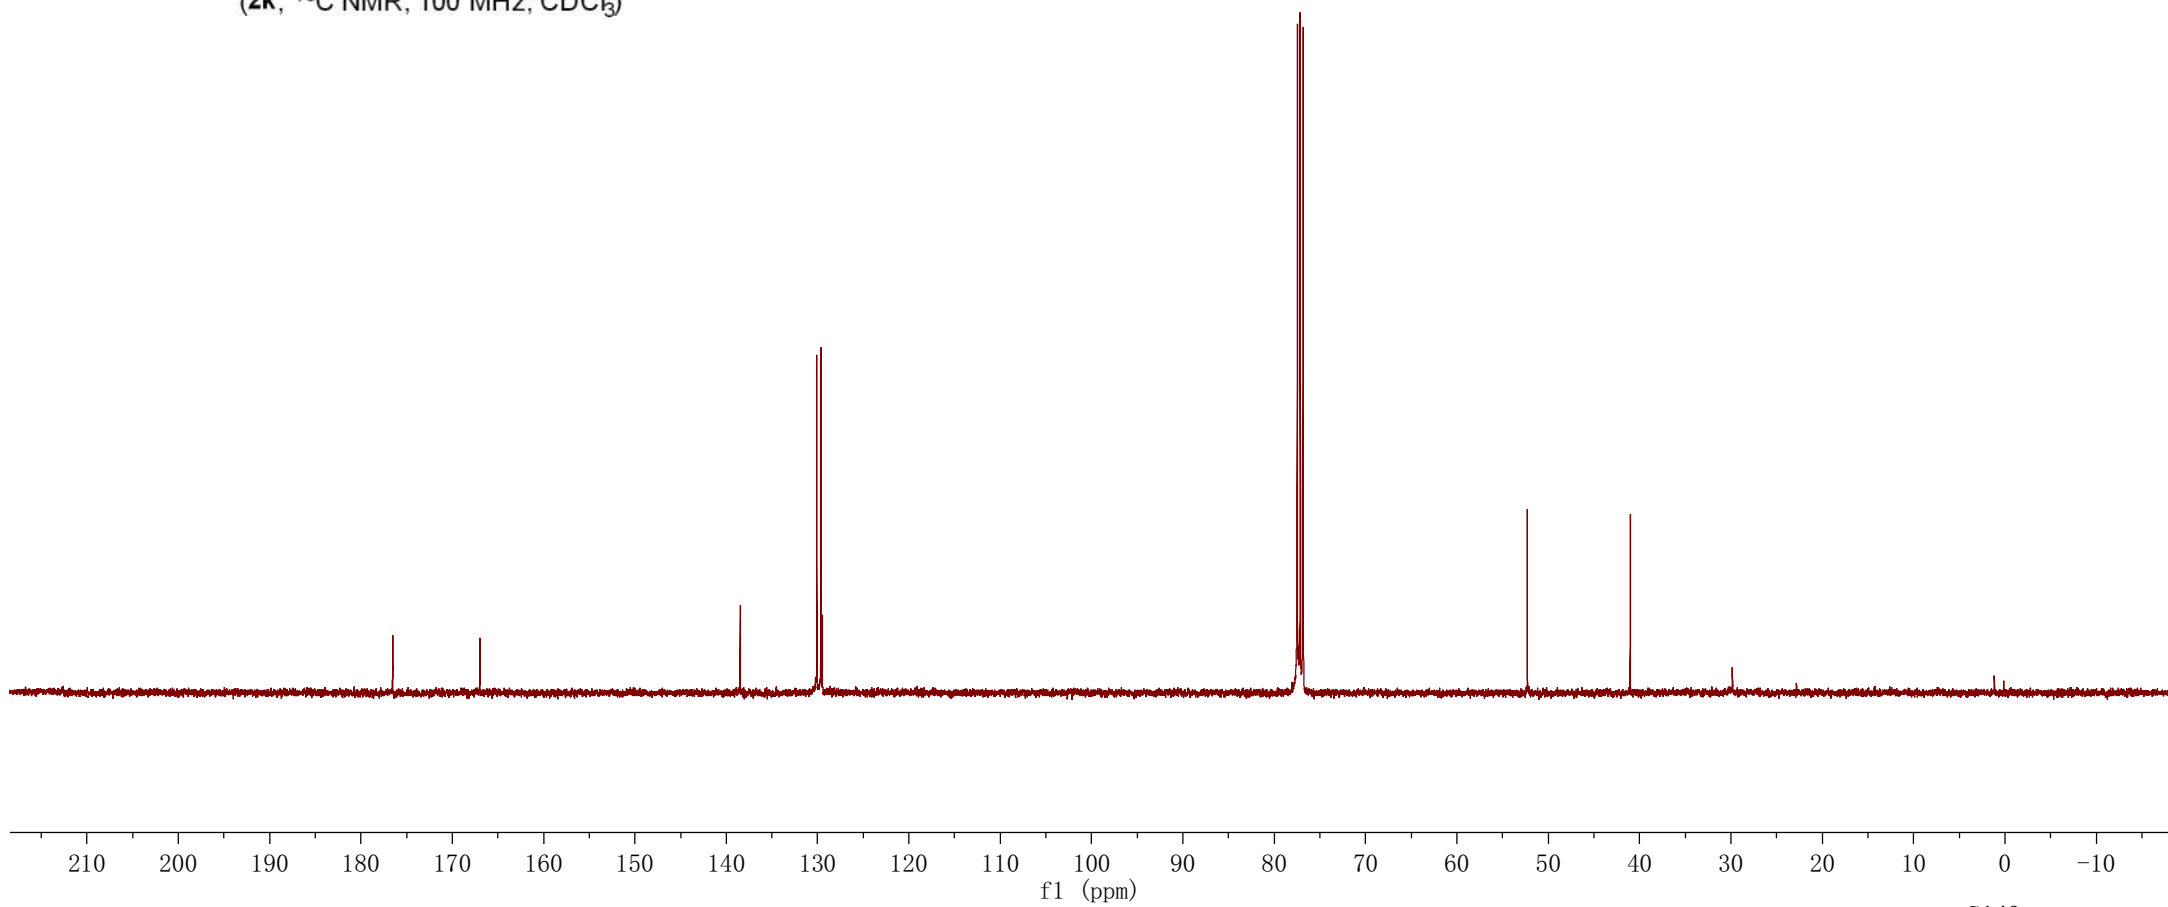

7.237  
7.225  
7.205  
7.197  
7.182  
7.169  
7.159

3.680

2.337

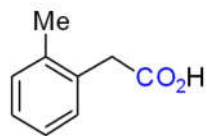

(2I, <sup>1</sup>H NMR, 400 MHz, CDCl<sub>3</sub>)

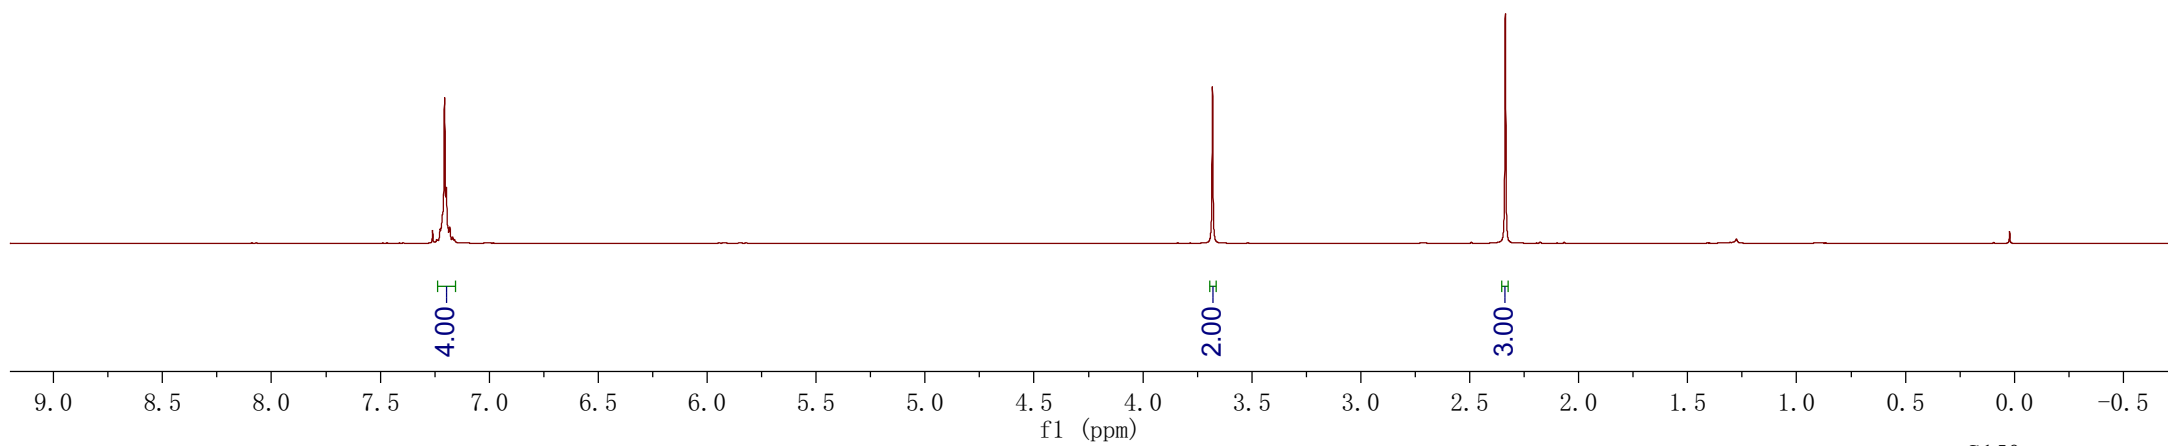

—178.046

137.077  
132.139  
130.558  
130.429  
127.828  
126.341

—39.010

—19.686

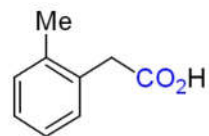

(2I, <sup>13</sup>C NMR, 100 MHz, CDCl<sub>3</sub>)

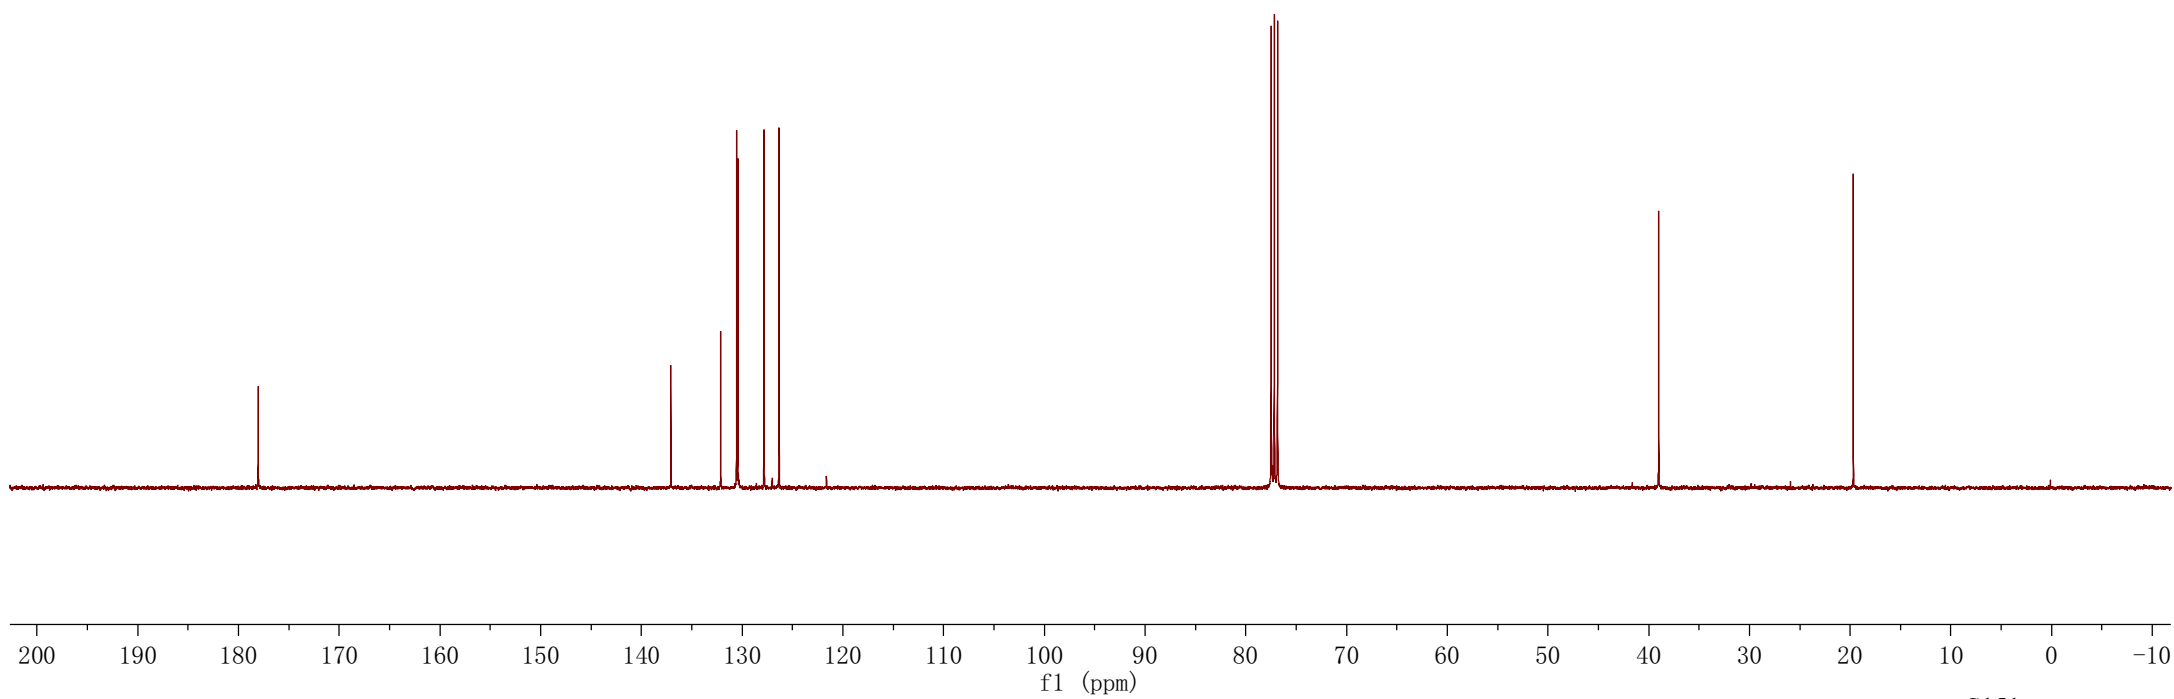

7.264  
7.260  
7.245  
7.241  
7.225  
7.220  
7.213  
7.206  
7.198  
7.181  
7.176  
7.164  
7.161  
7.146  
7.141

3.683

2.685  
2.666  
2.647  
2.628

1.228  
1.209  
1.190

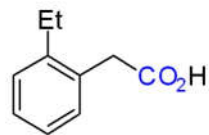

(2m, <sup>1</sup>H NMR, 400 MHz, CDCl<sub>3</sub>)

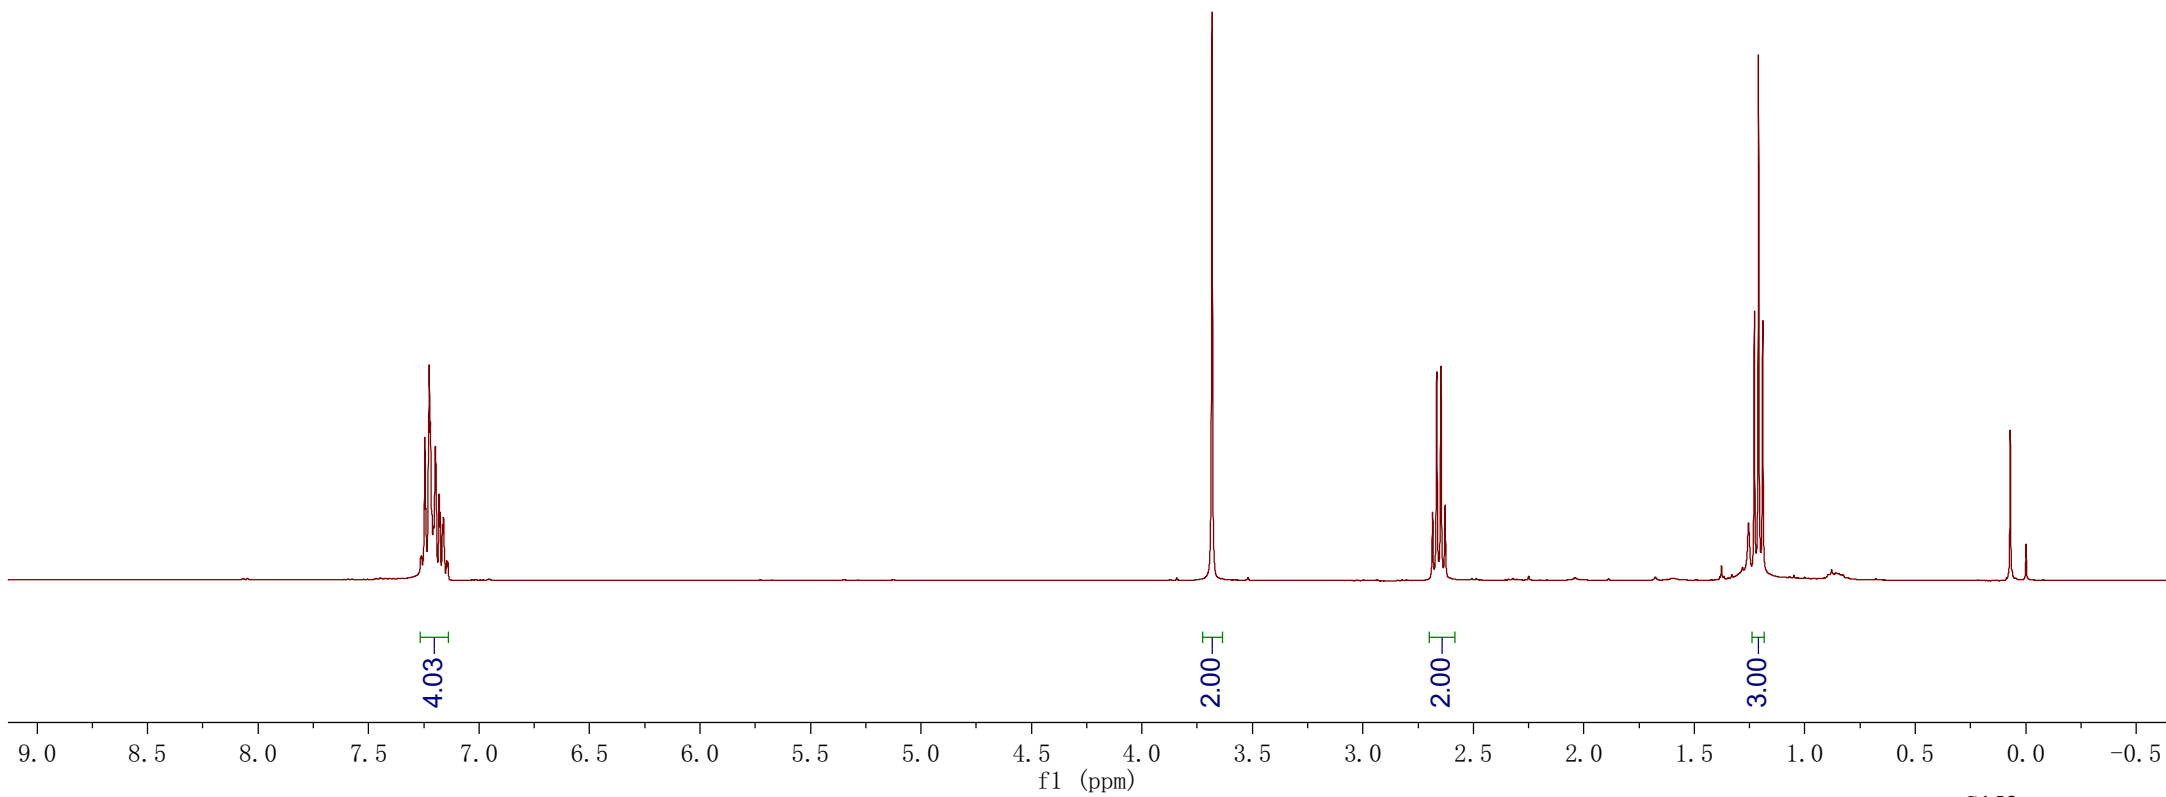



—177.995

—142.807

131.427

130.711

128.753

128.006

126.250

—38.366

—25.926

—14.933

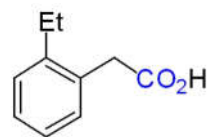

(2m, <sup>13</sup>C NMR, 100 MHz, CDCl<sub>3</sub>)

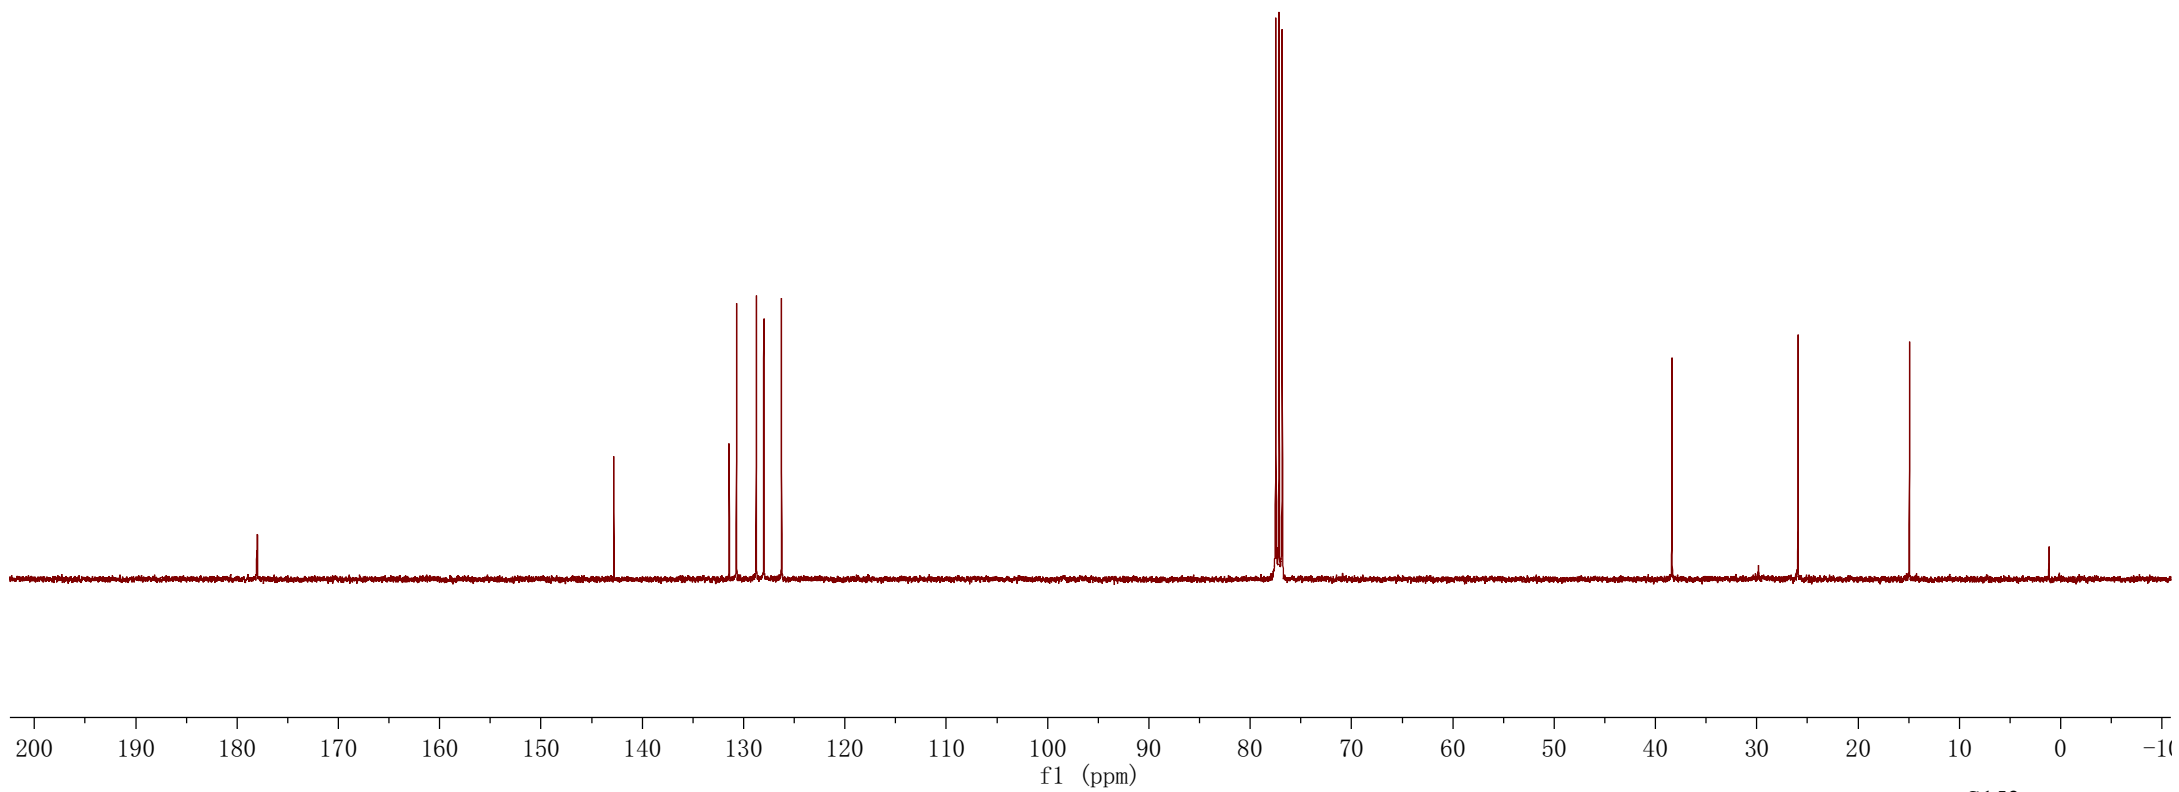

7.302  
7.290  
7.283  
7.279  
6.911  
6.891  
6.870  
6.854

3.832  
3.655

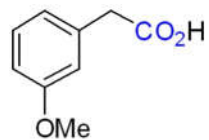

(2n, <sup>1</sup>H NMR, 400 MHz, CDCl<sub>3</sub>)

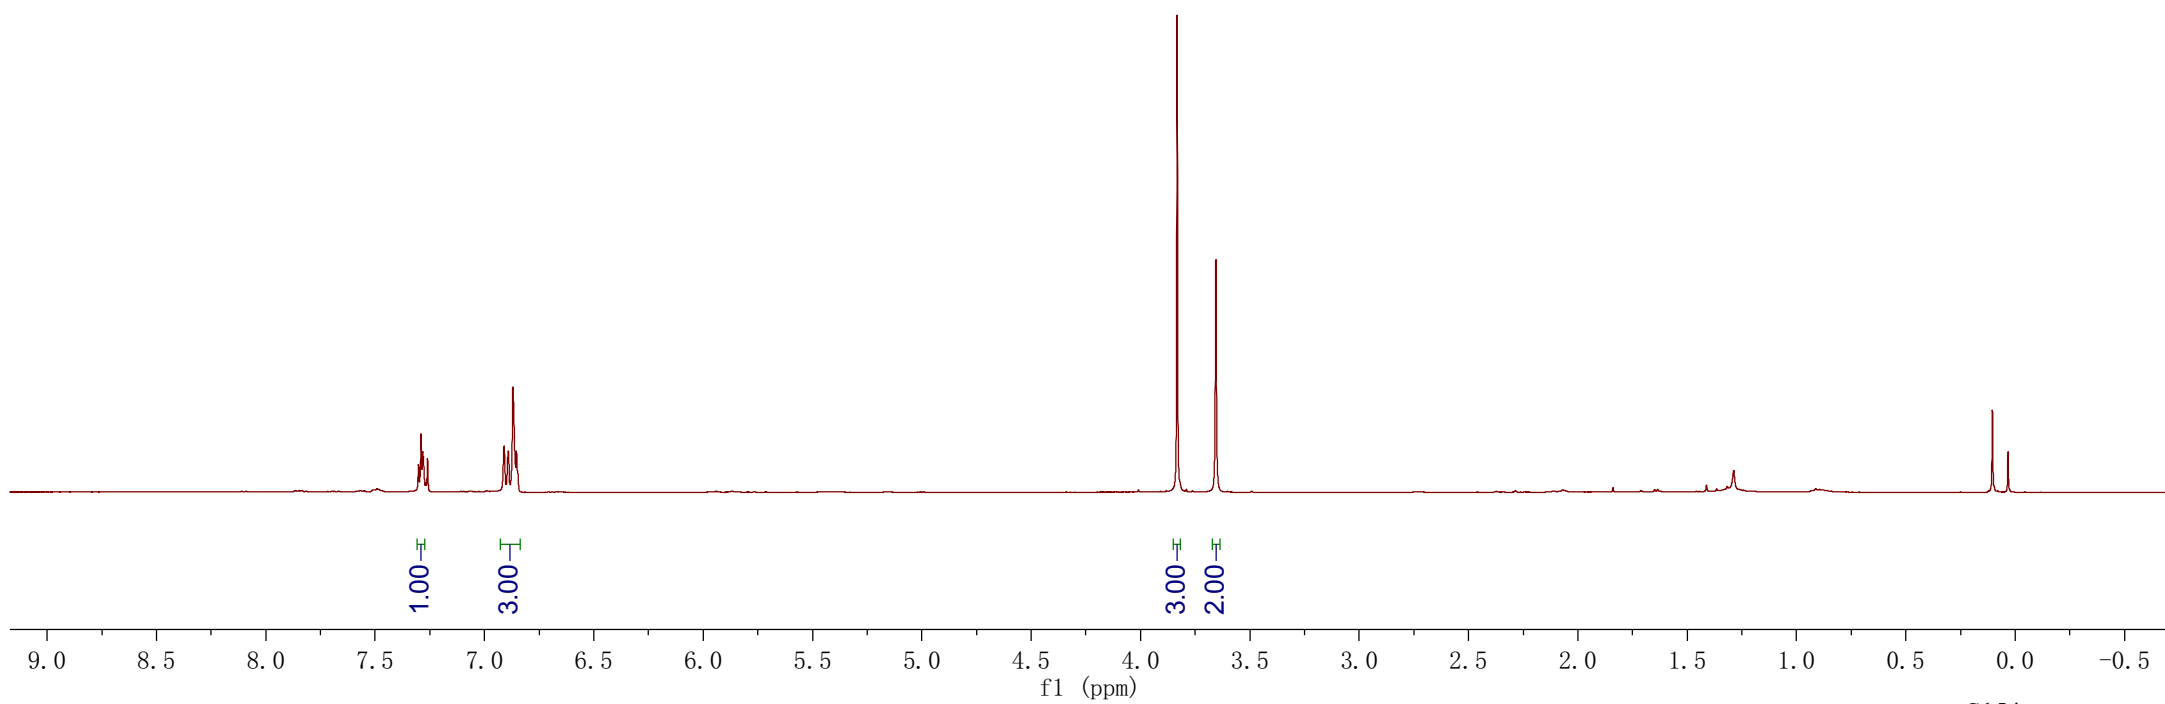

—177.392

—159.887

—134.820

—129.782

—121.855

—115.195

—113.028

—55.357

—41.178

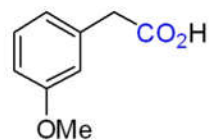

(2n, <sup>13</sup>C NMR, 100 MHz, CDCl<sub>3</sub>)

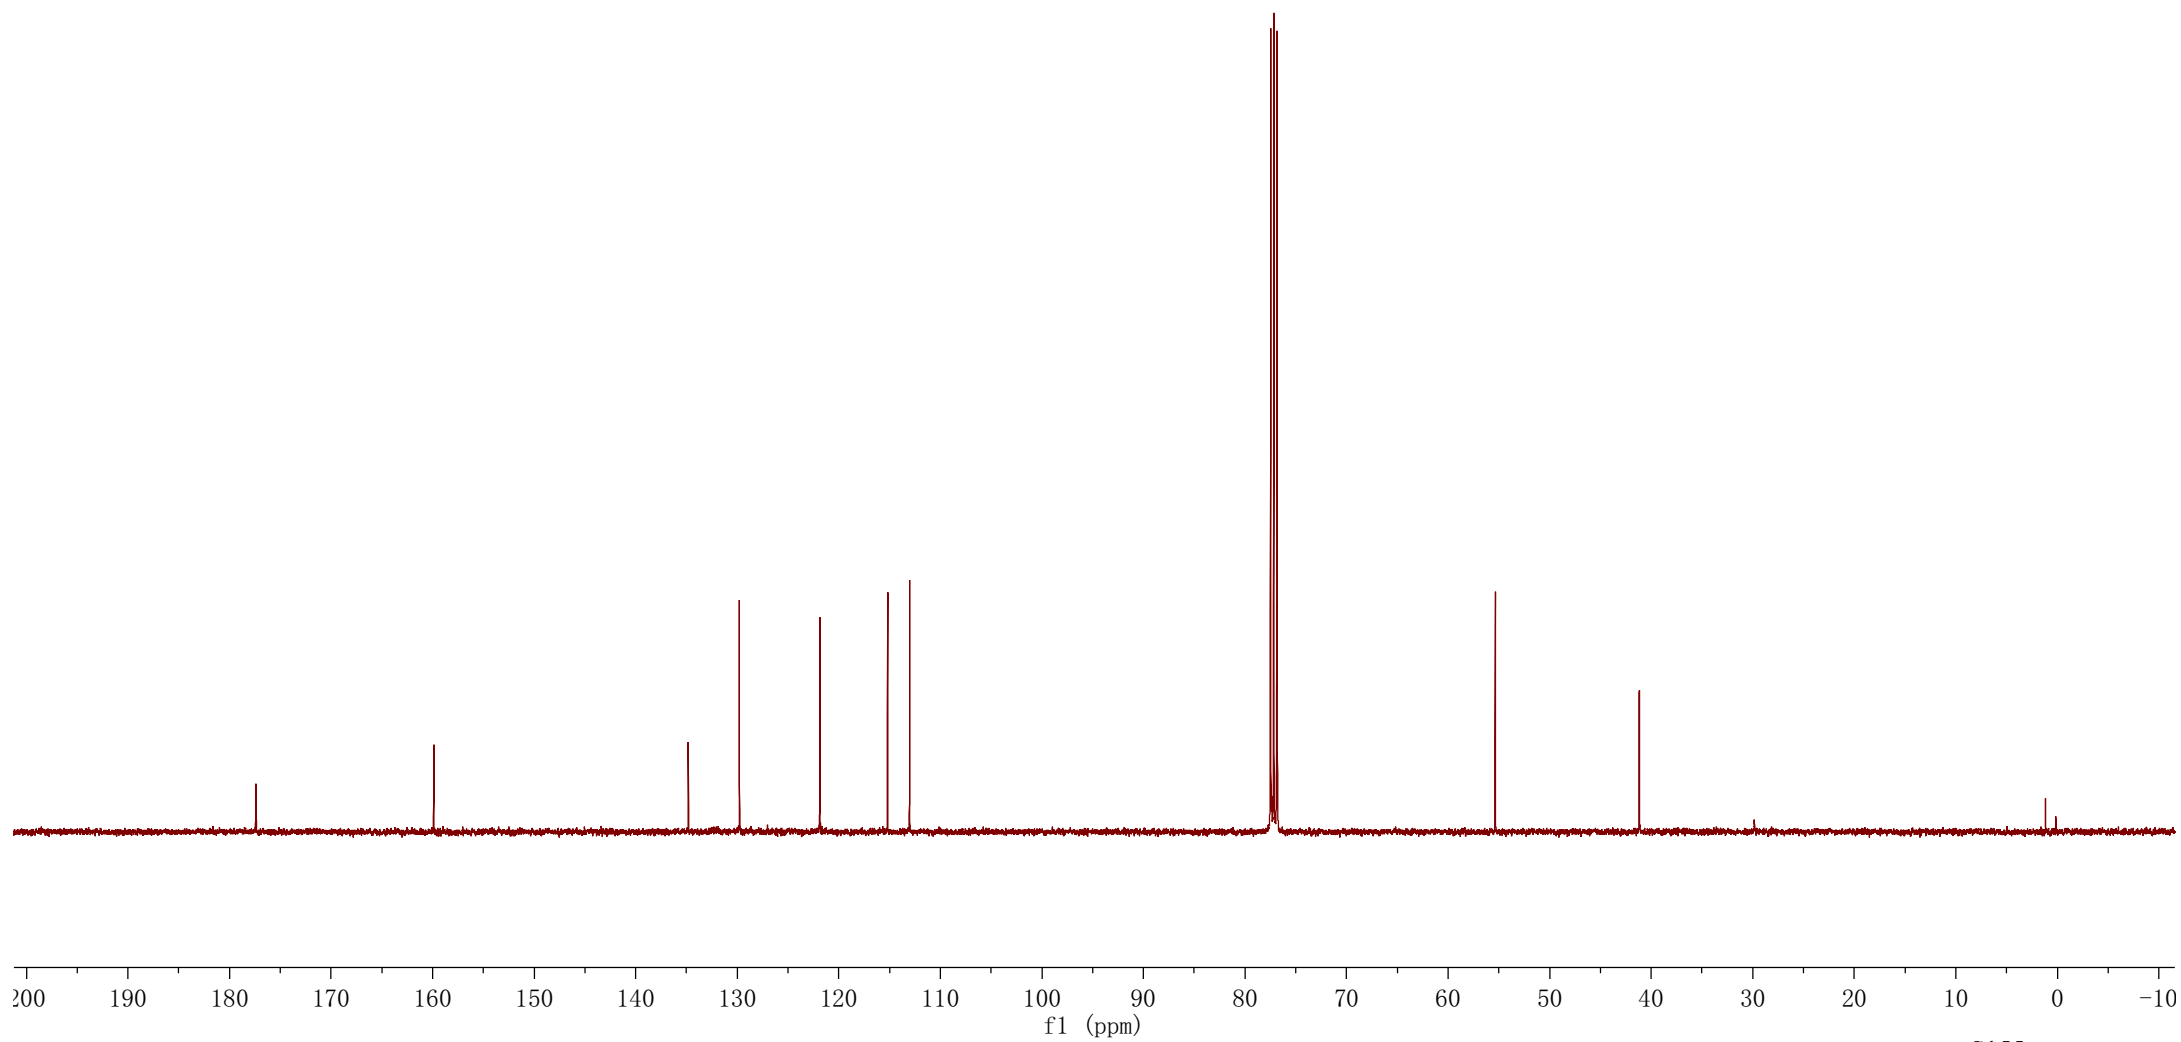

7.371  
7.352  
7.332  
7.319  
7.300  
7.280  
7.144  
7.125  
7.107  
7.042  
7.022  
6.968  
6.944  
6.939  
6.923  
6.919

3.636

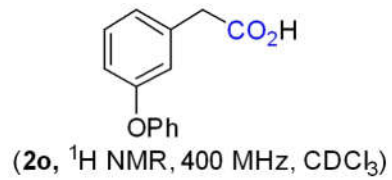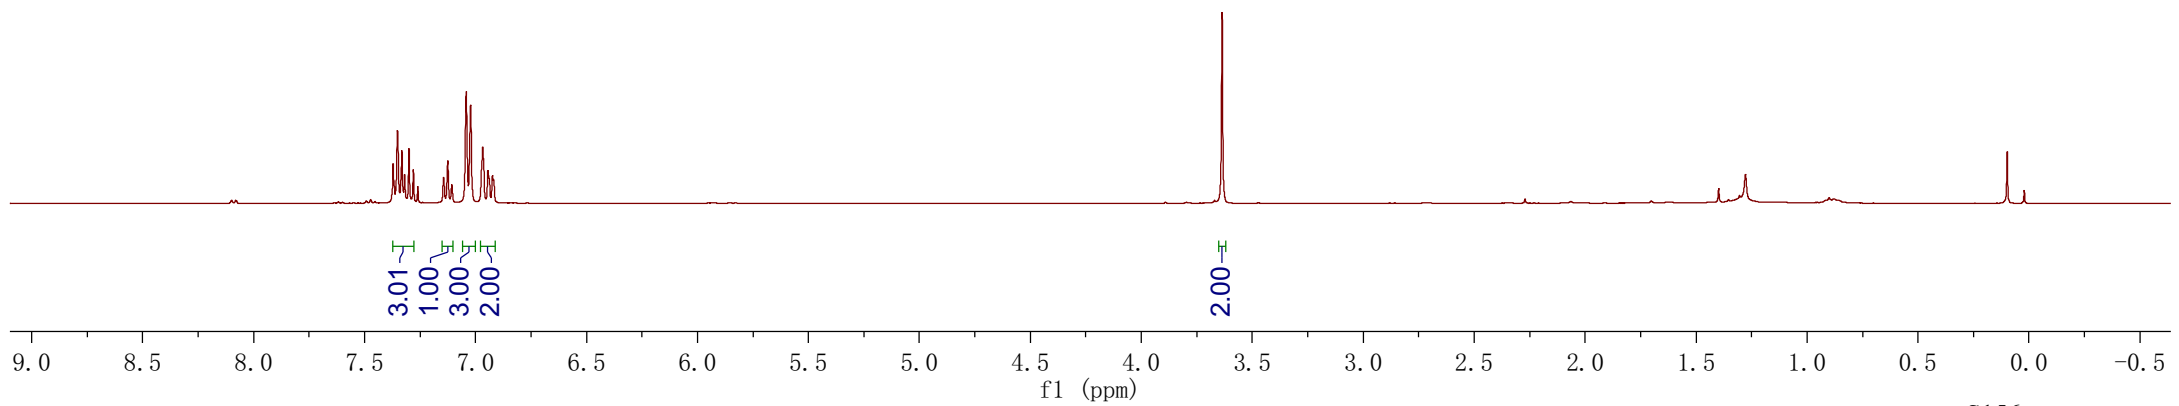

—177.712

157.655  
157.023

135.168  
130.007  
129.915  
124.257  
123.572  
119.940  
119.218  
117.694

—40.987

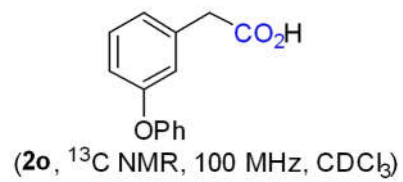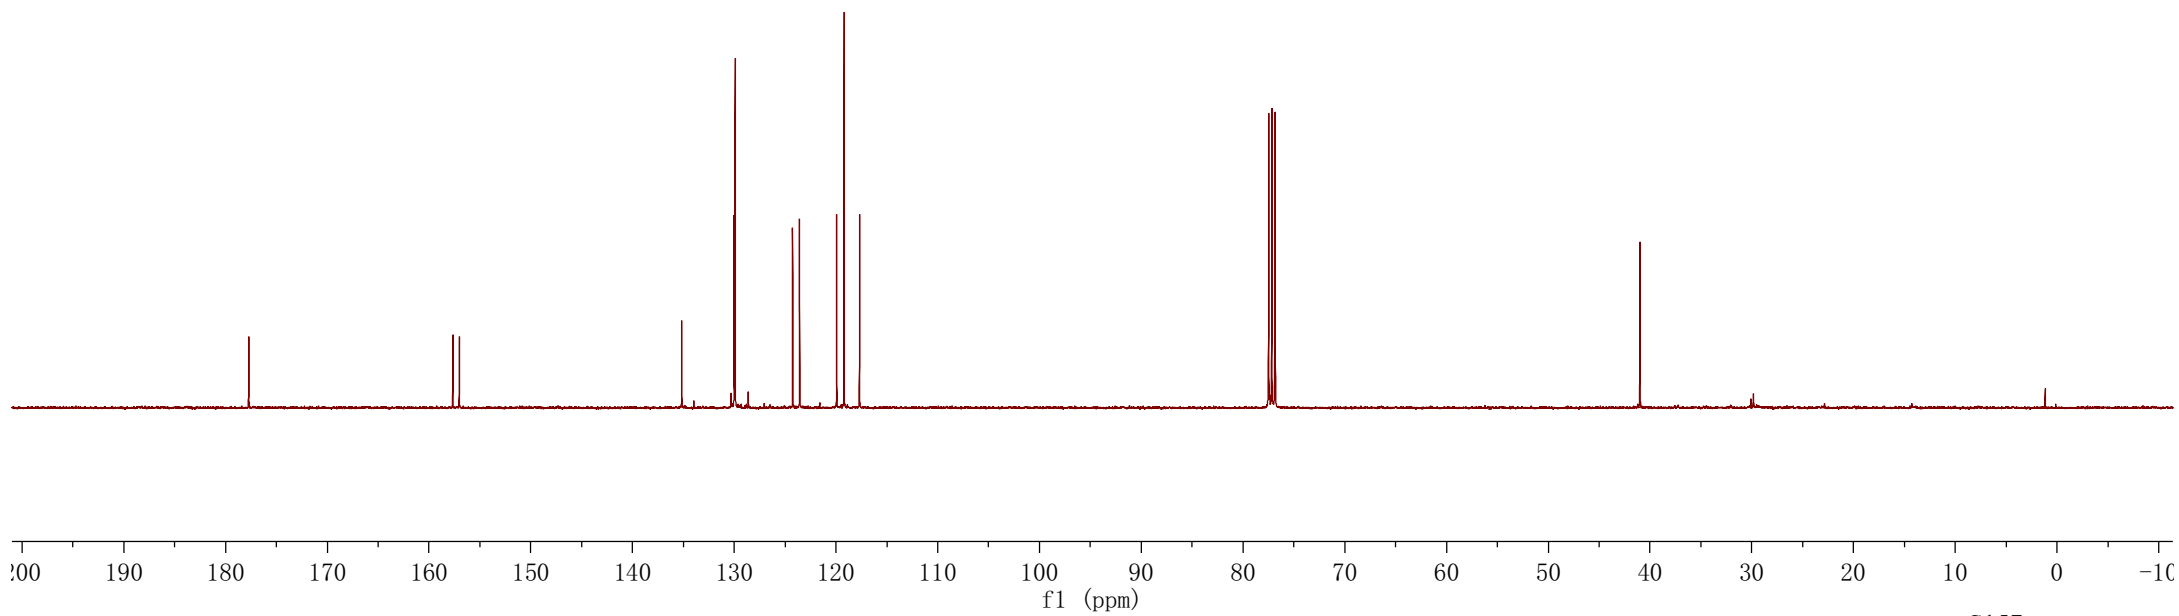

7.385  
7.366  
7.344  
7.260  
7.233  
7.214  
7.165  
7.148

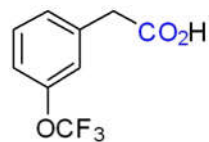

(2p, <sup>1</sup>H NMR, 400 MHz, CDCl<sub>3</sub>)

—3.679

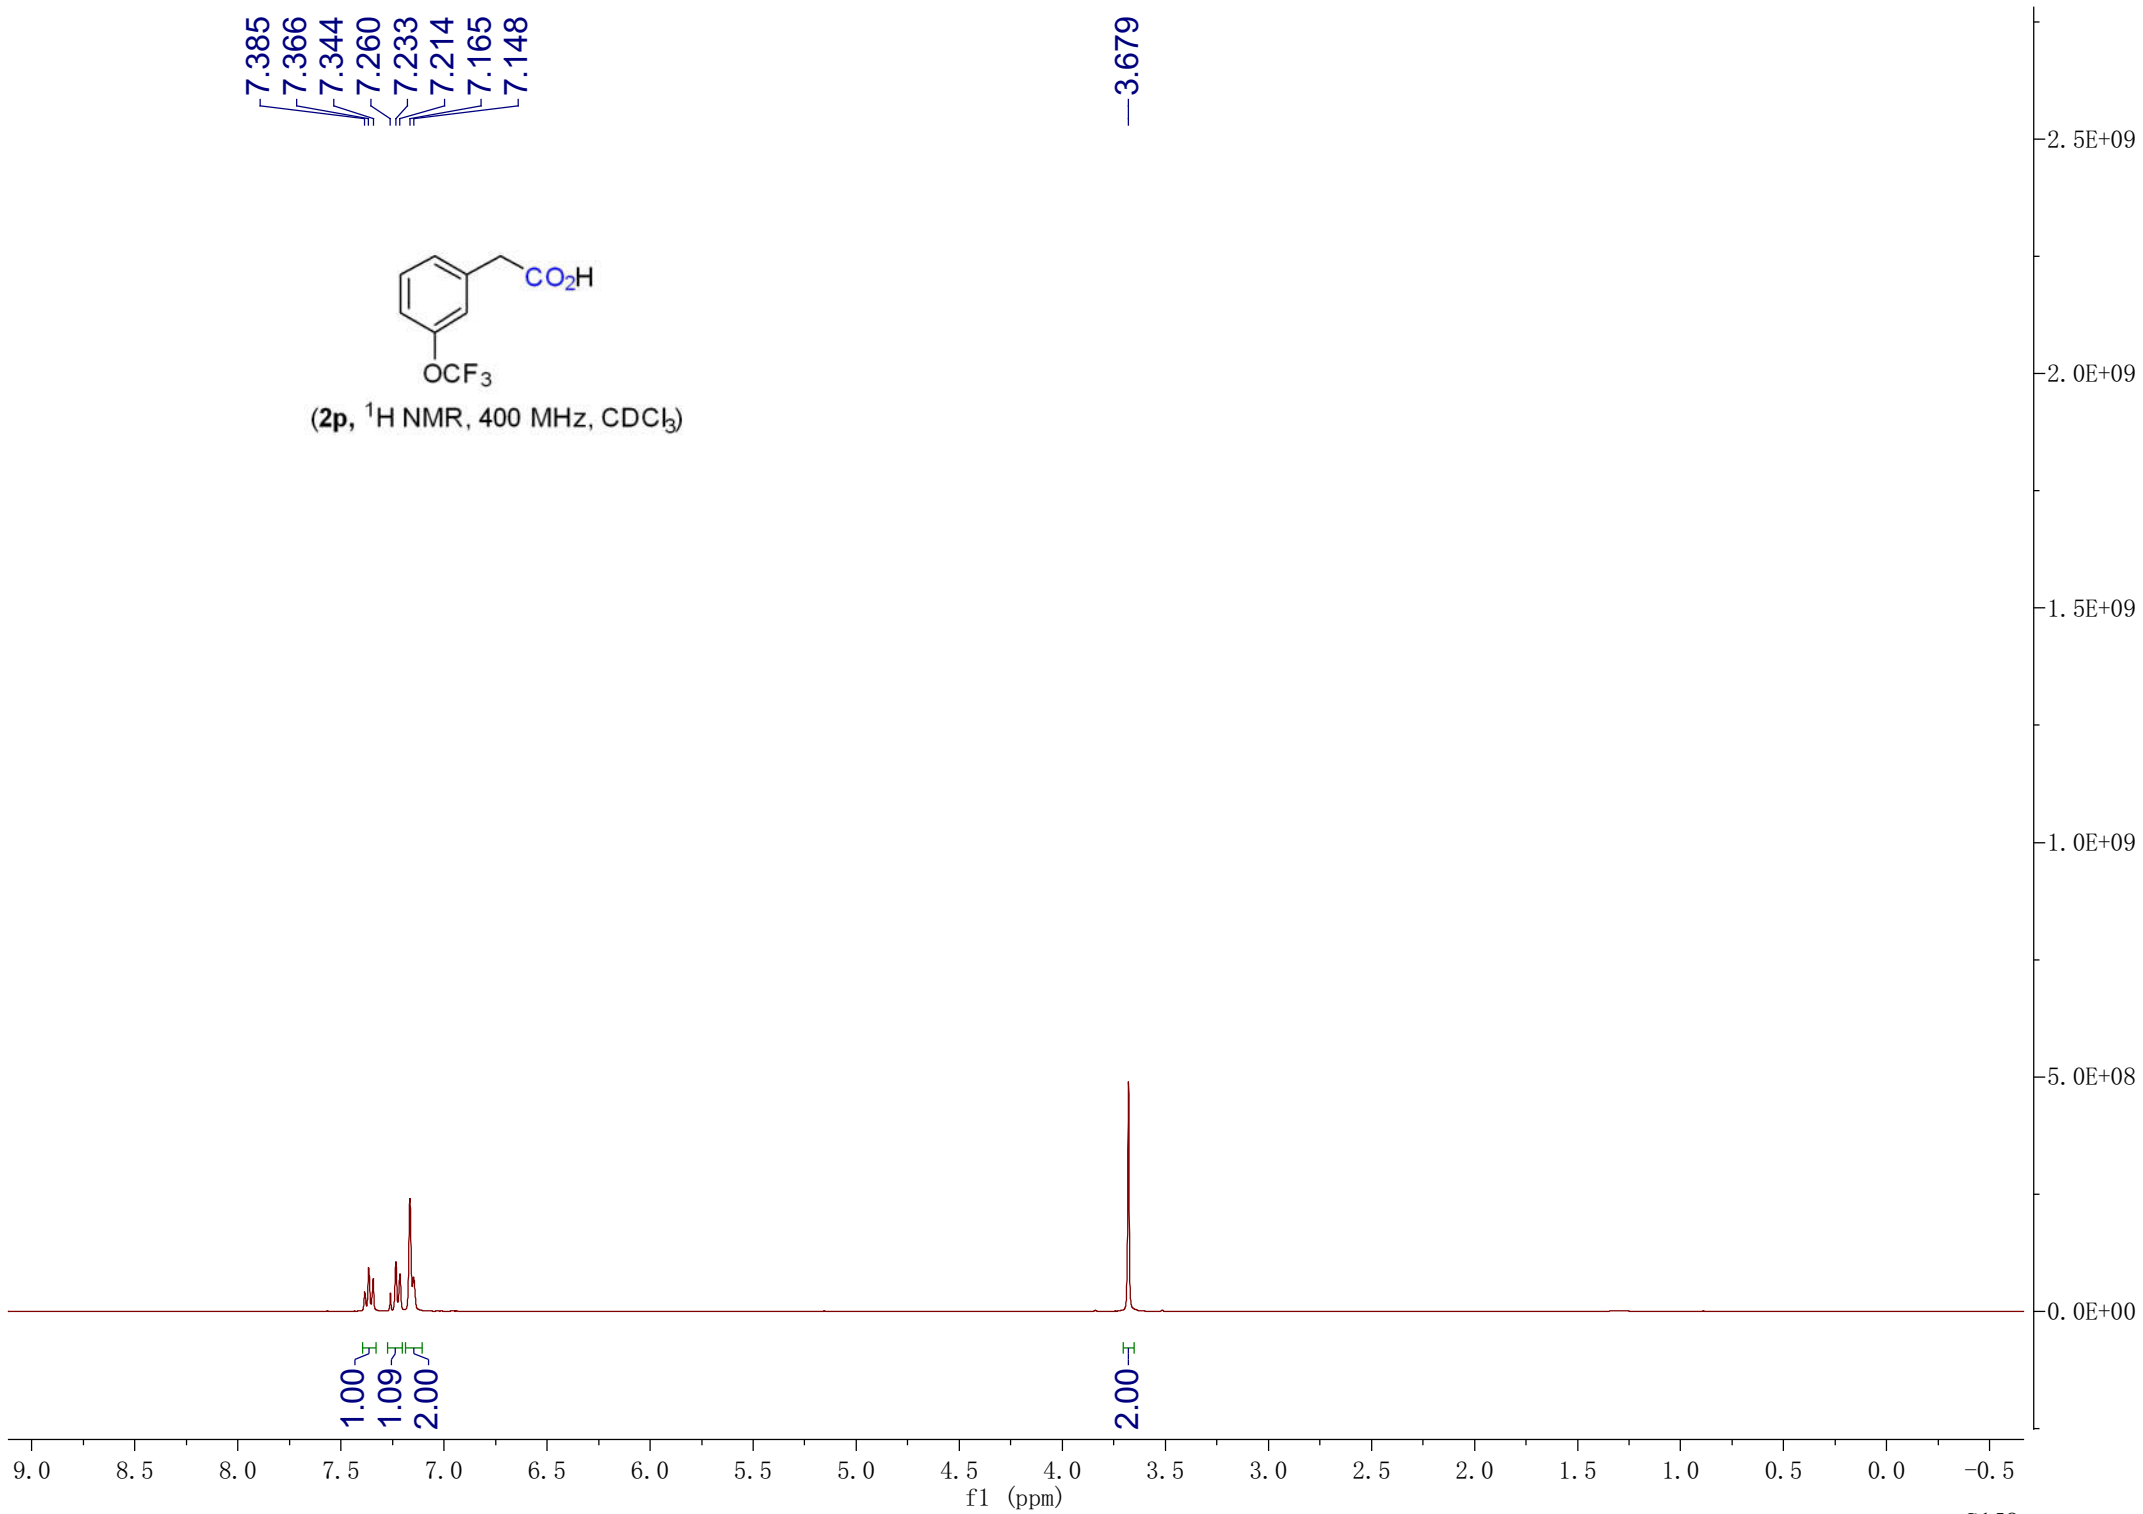

—177.398

—149.506

135.356

130.084

127.980

124.412

122.207

121.854

119.993

119.298

116.741

—40.738

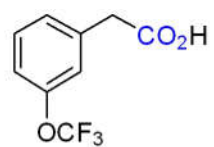

(2p,  $^{13}\text{C}$  NMR, 100 MHz,  $\text{CDCl}_3$ )

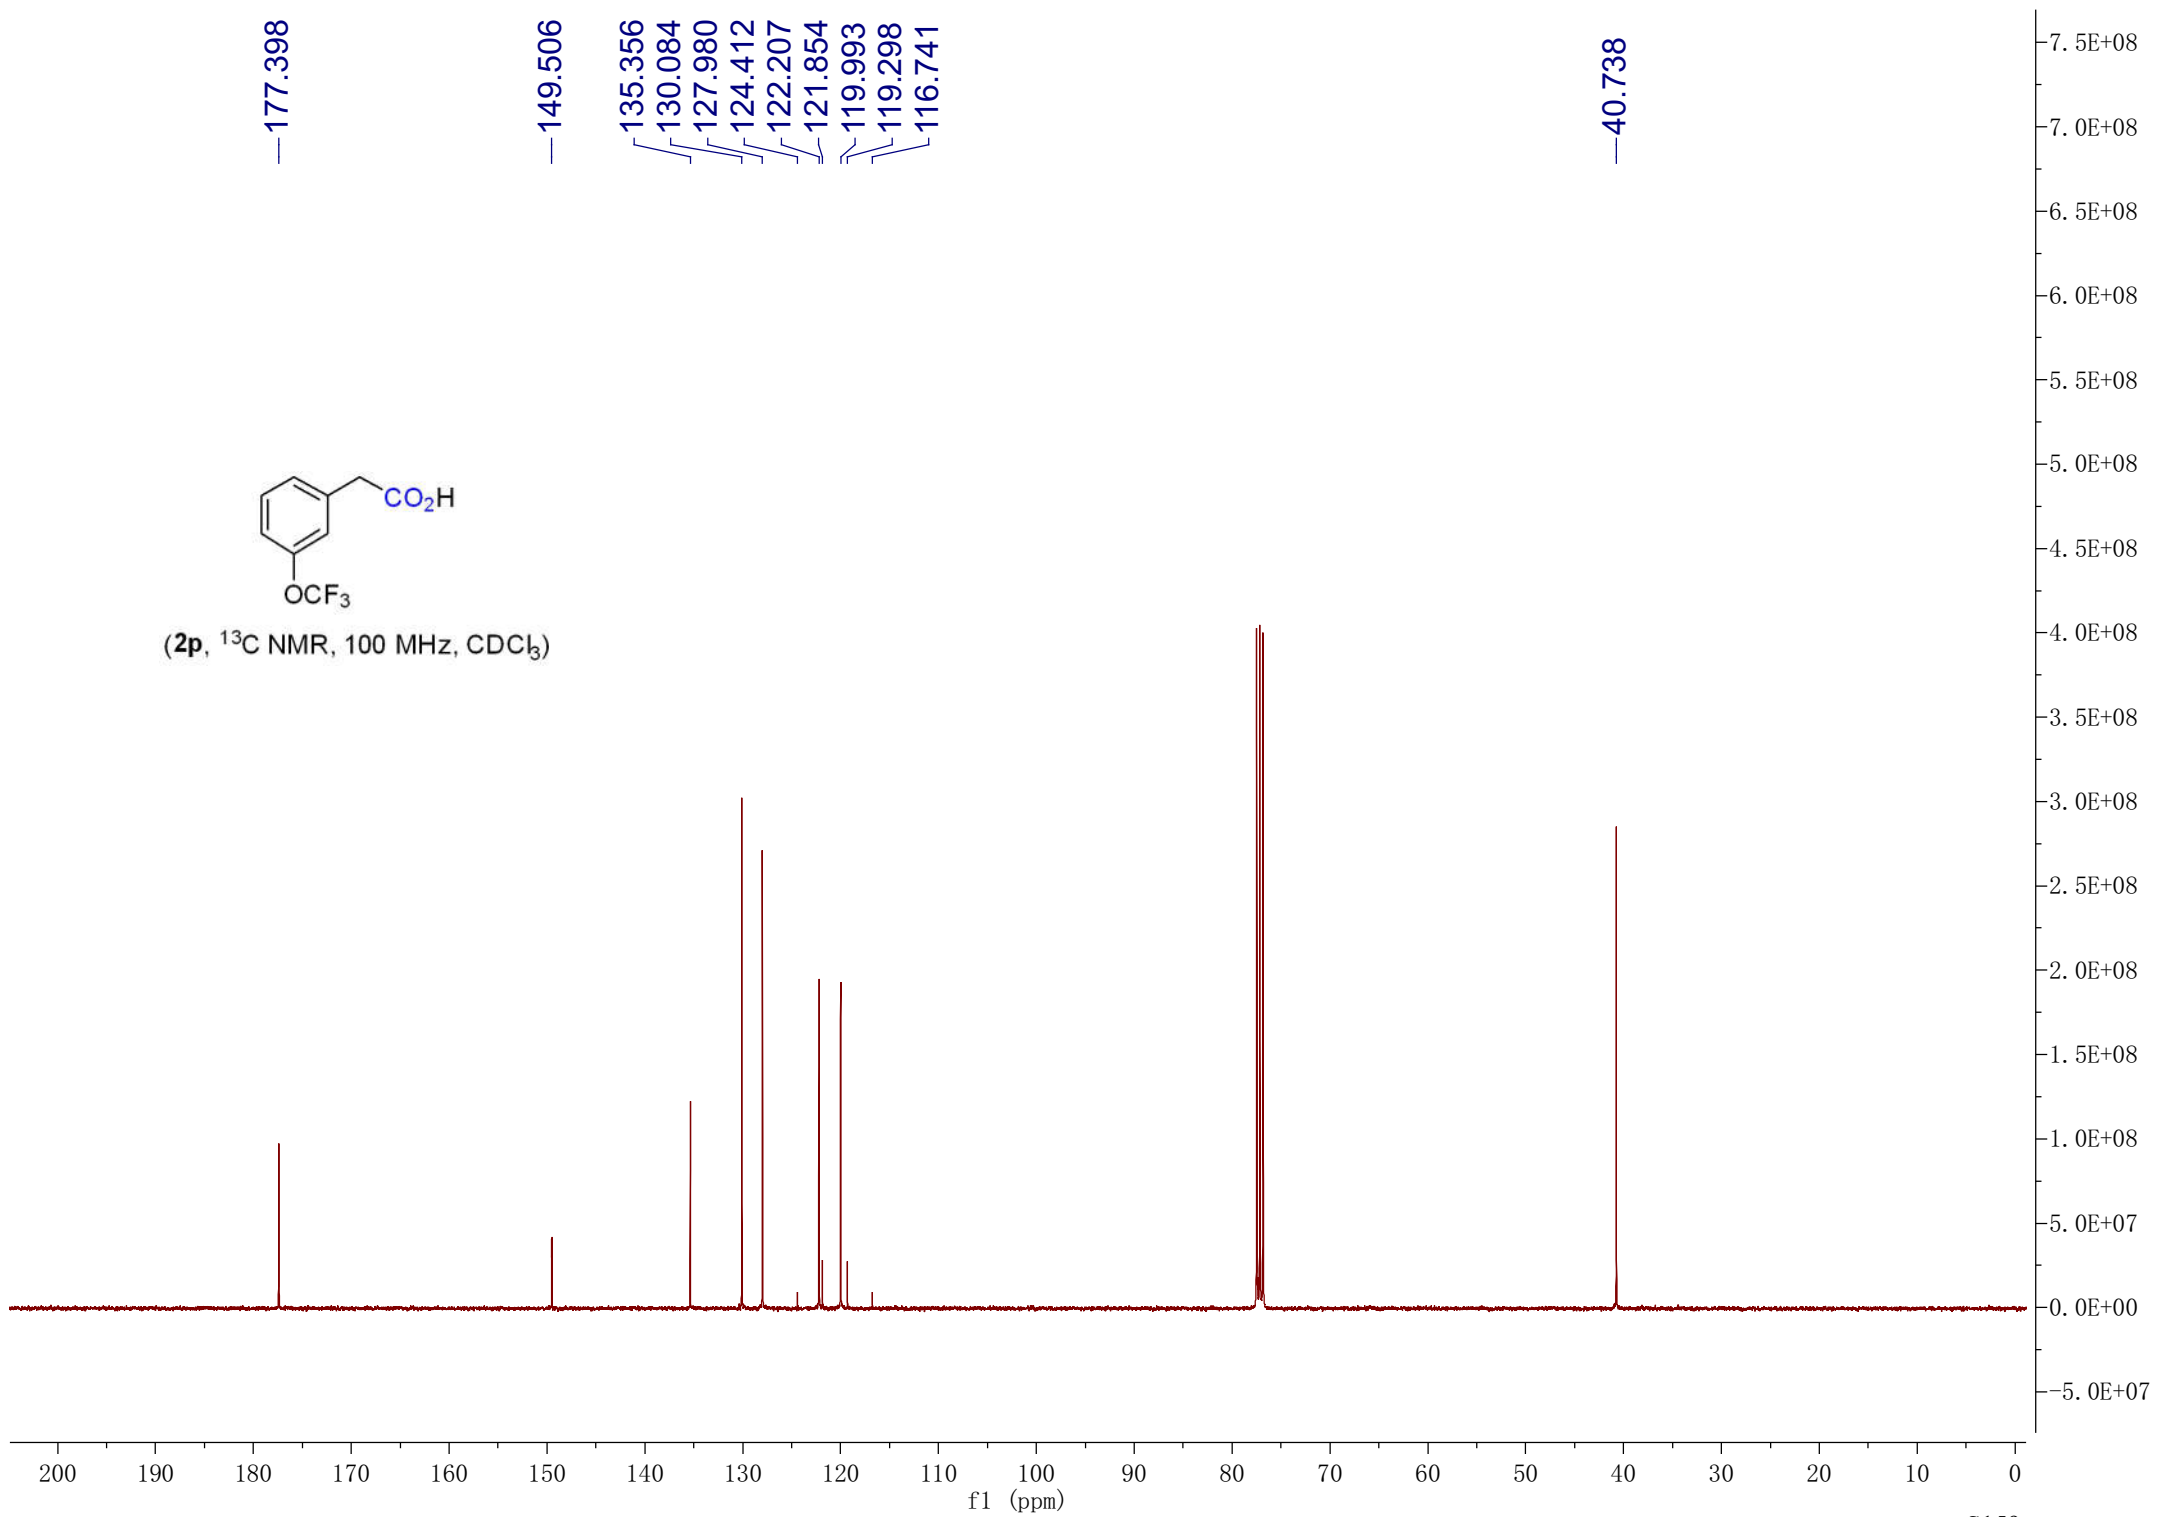

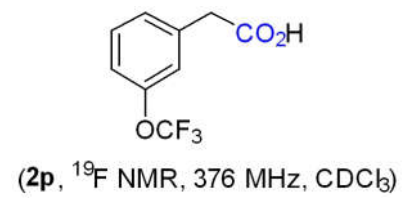

--57.783

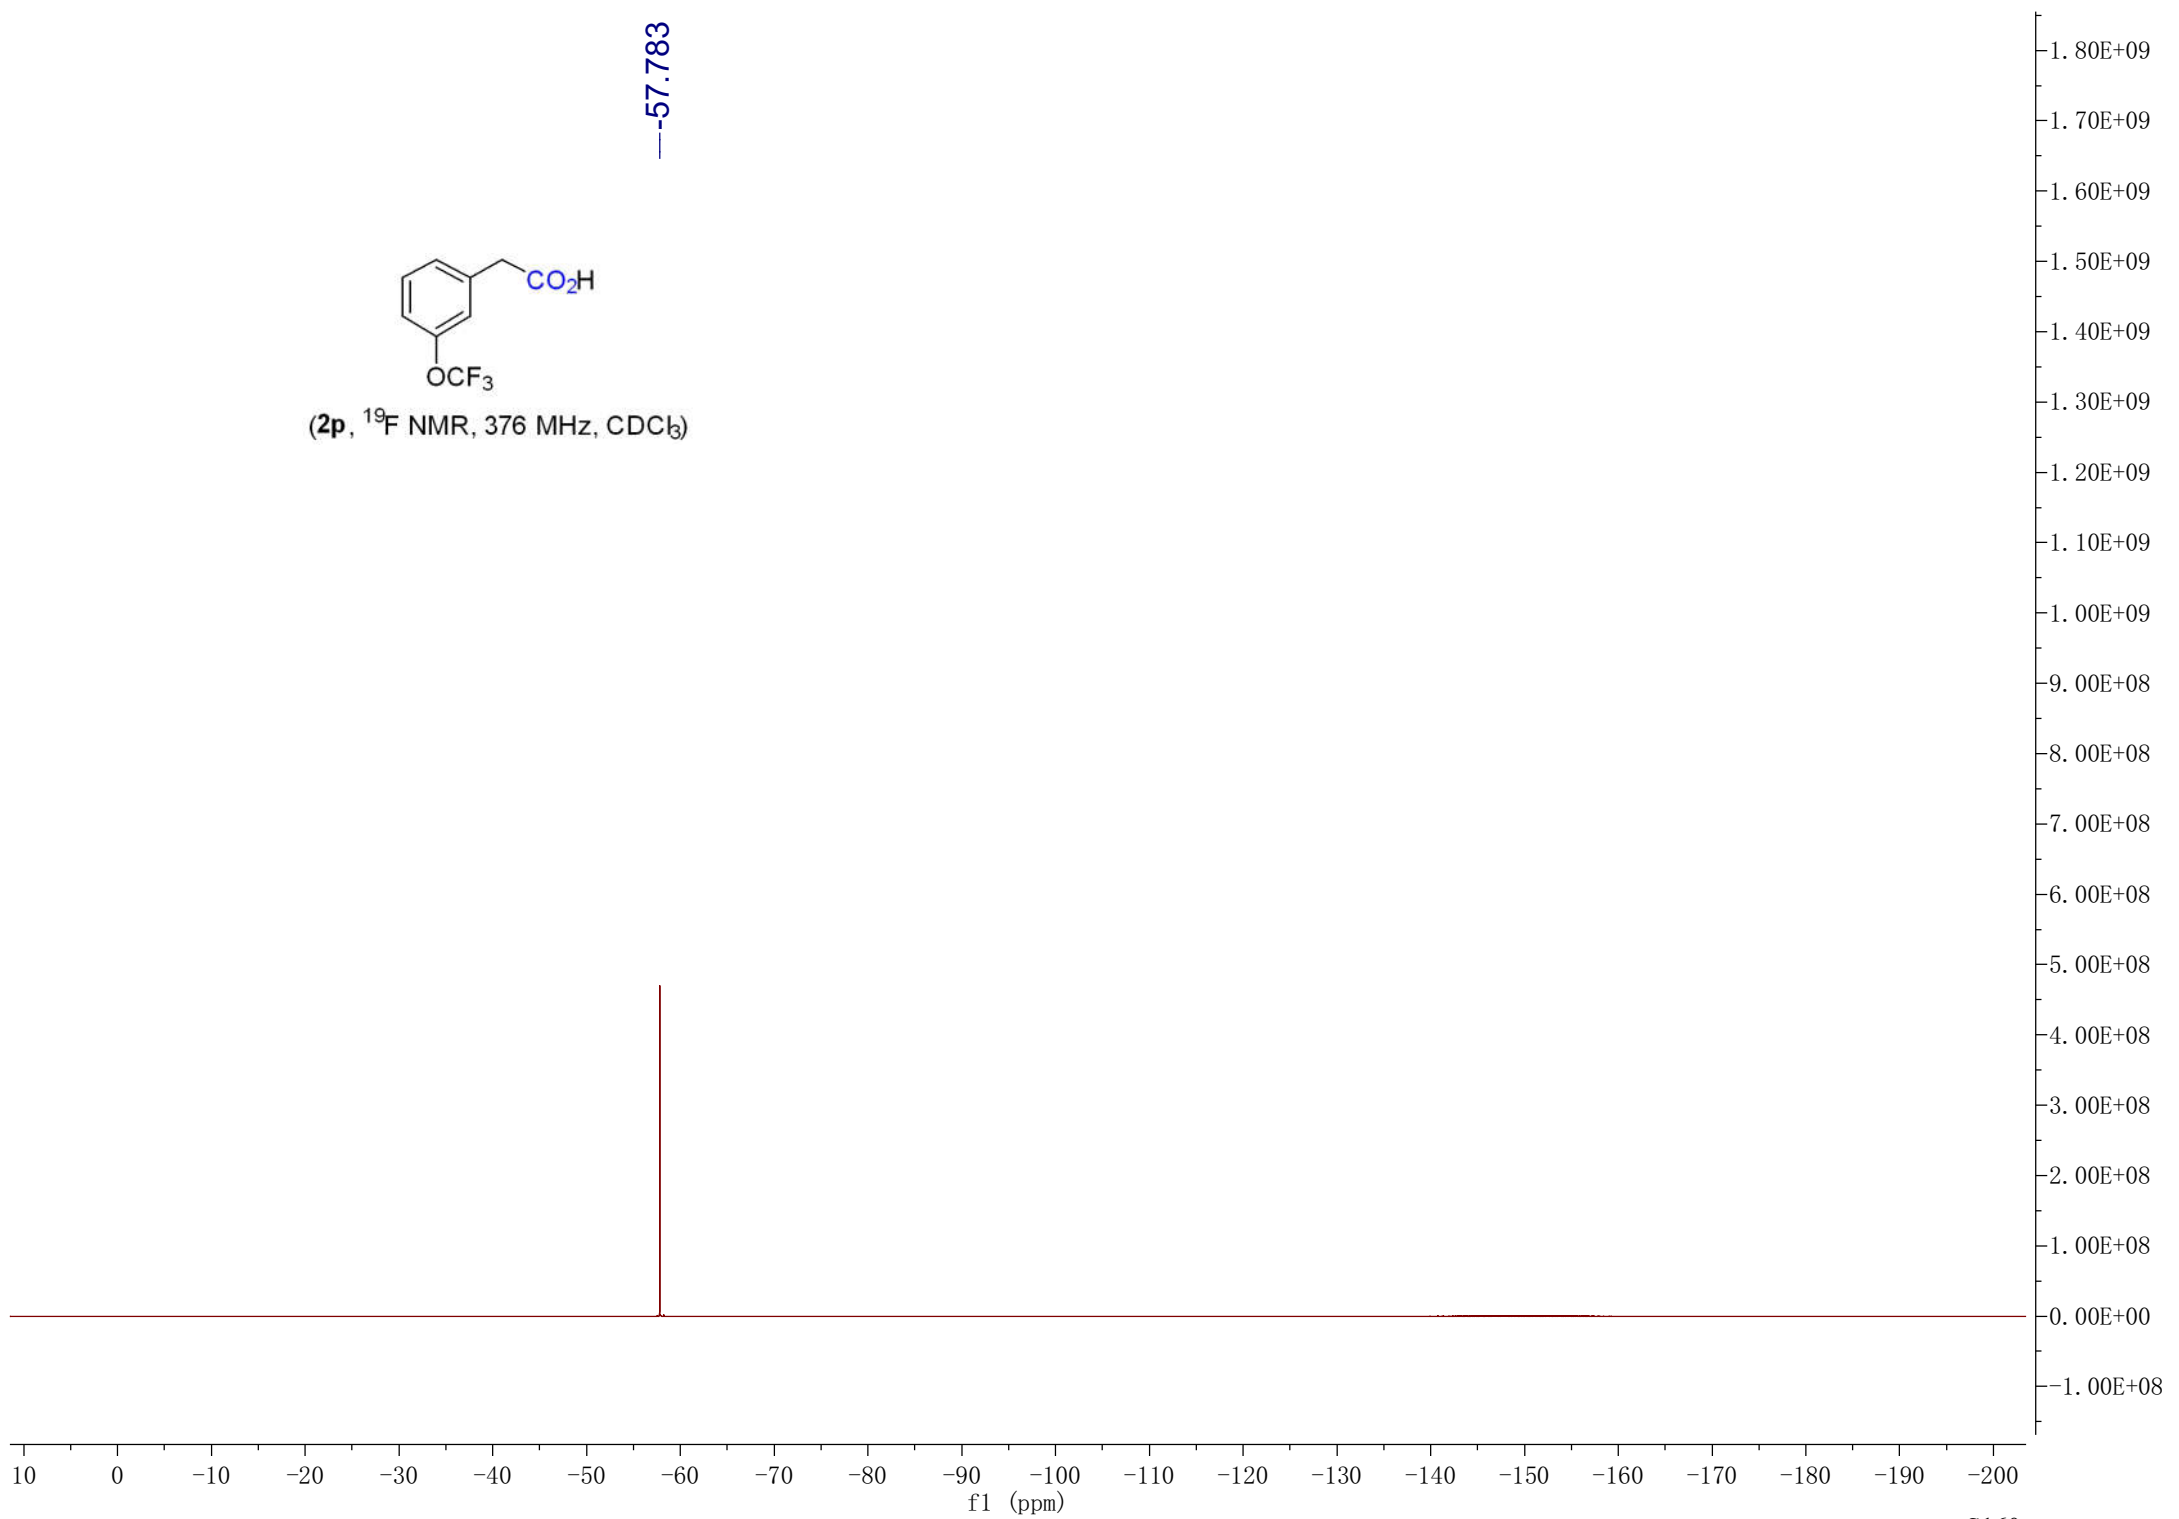



7.244  
7.238  
7.225  
7.218  
7.214  
7.206  
7.103  
7.096  
7.075

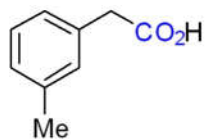

(2q, <sup>1</sup>H NMR, 400 MHz, CDCl<sub>3</sub>)

3.613

2.344

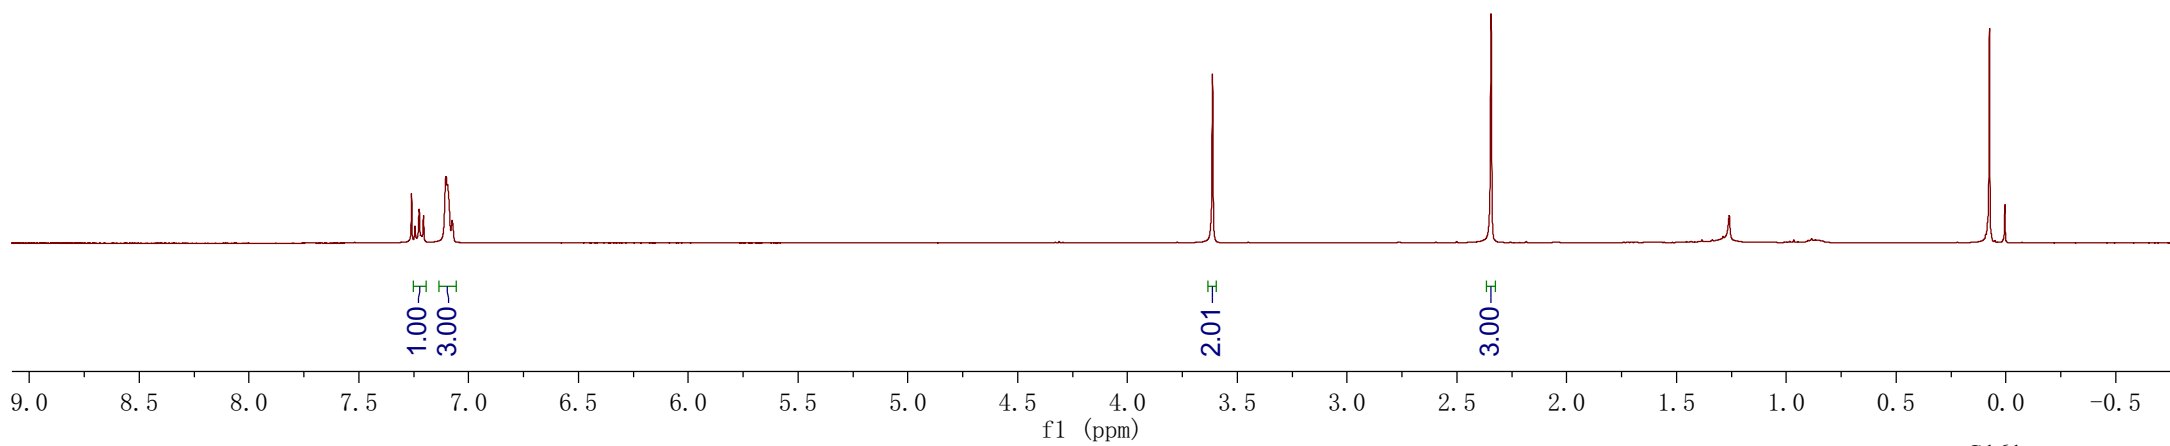

—177.416

138.496  
133.316  
130.255  
128.700  
128.262  
126.516

—41.062

—21.477

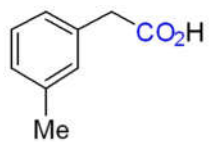

(2q, <sup>13</sup>C NMR, 100 MHz, CDCl<sub>3</sub>)

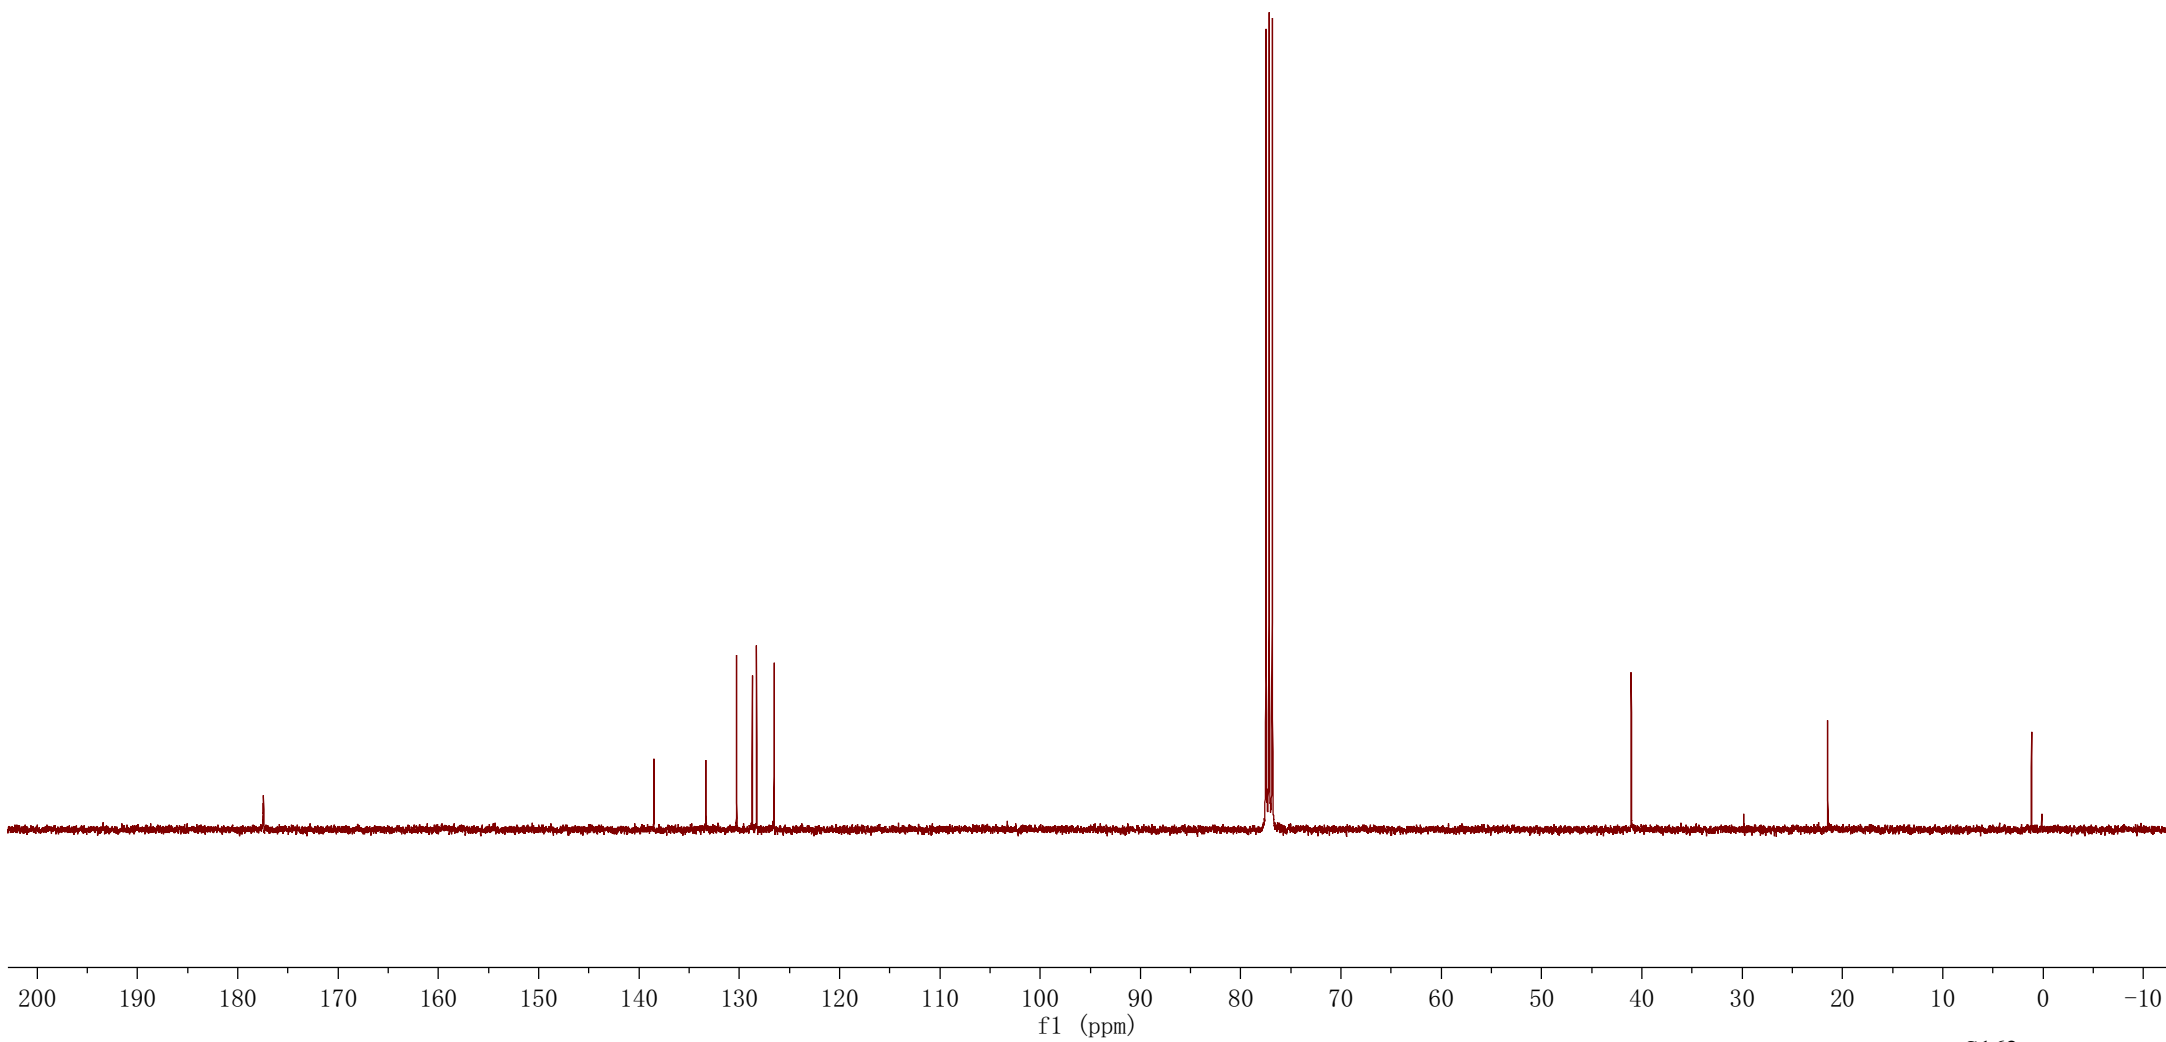

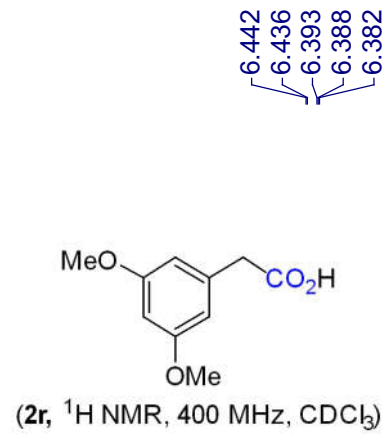

3.780  
3.580

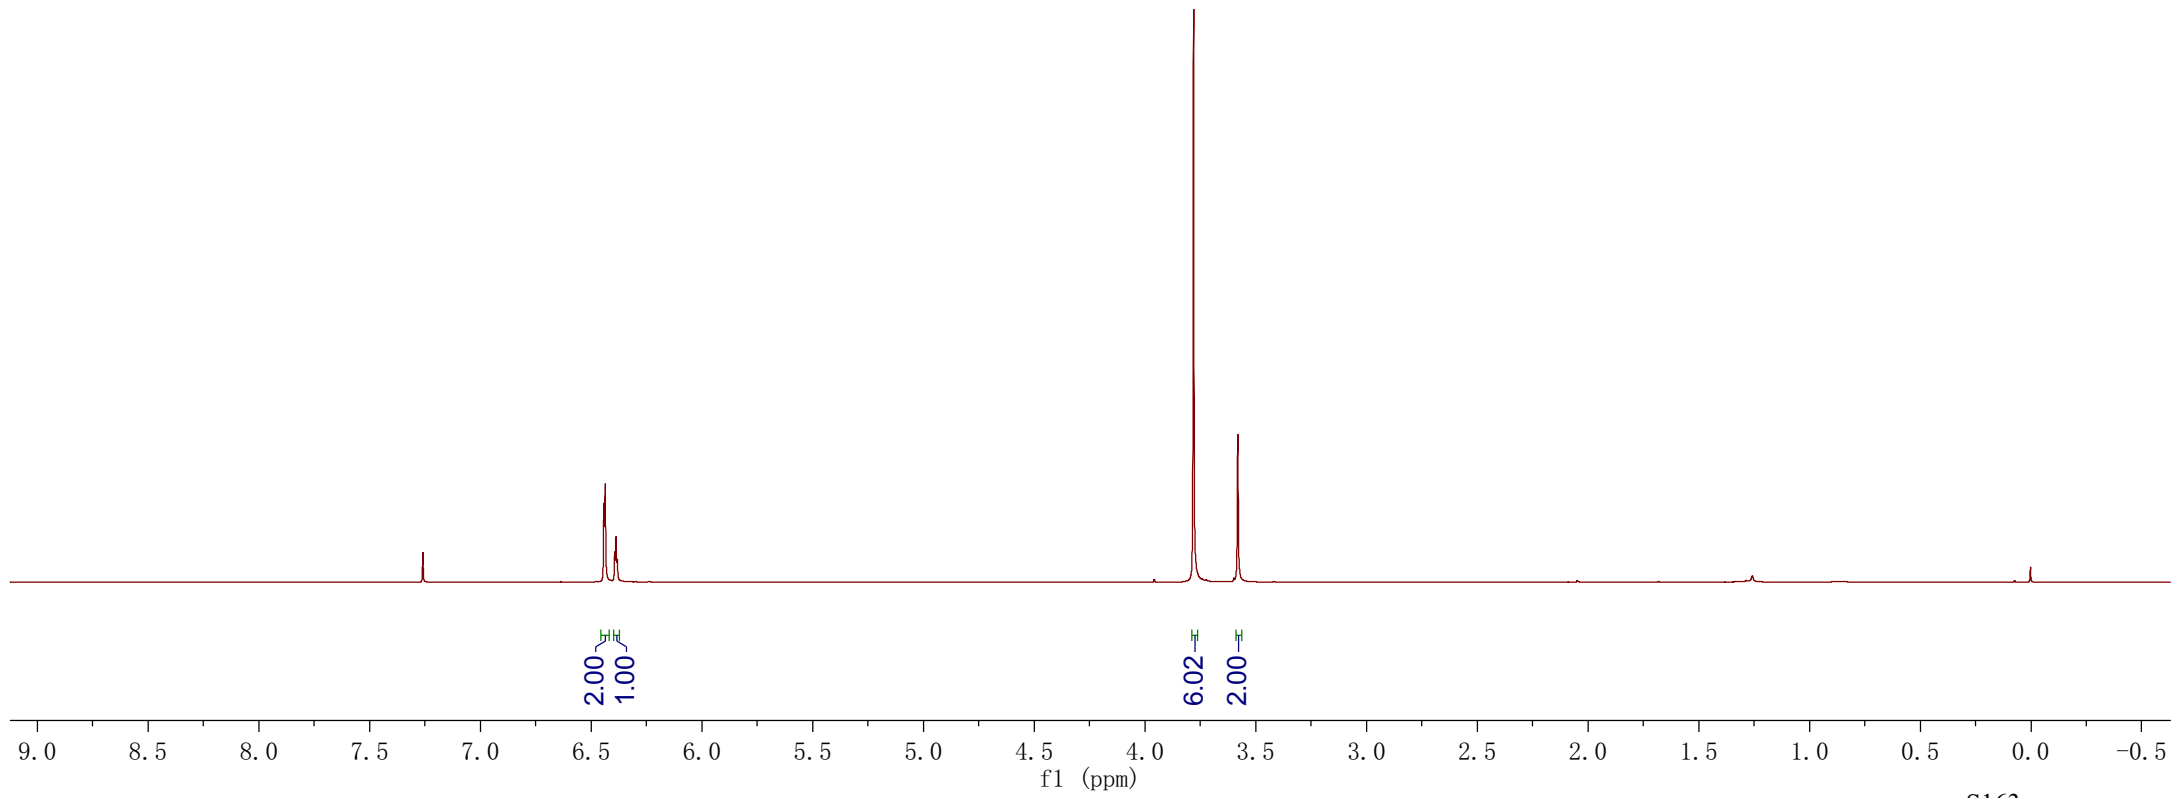

—177.262

—161.064

—135.435

—107.642

—99.607

—55.475

—41.382

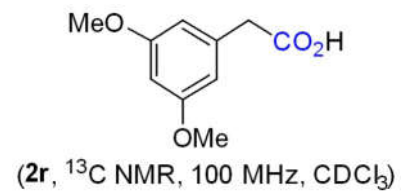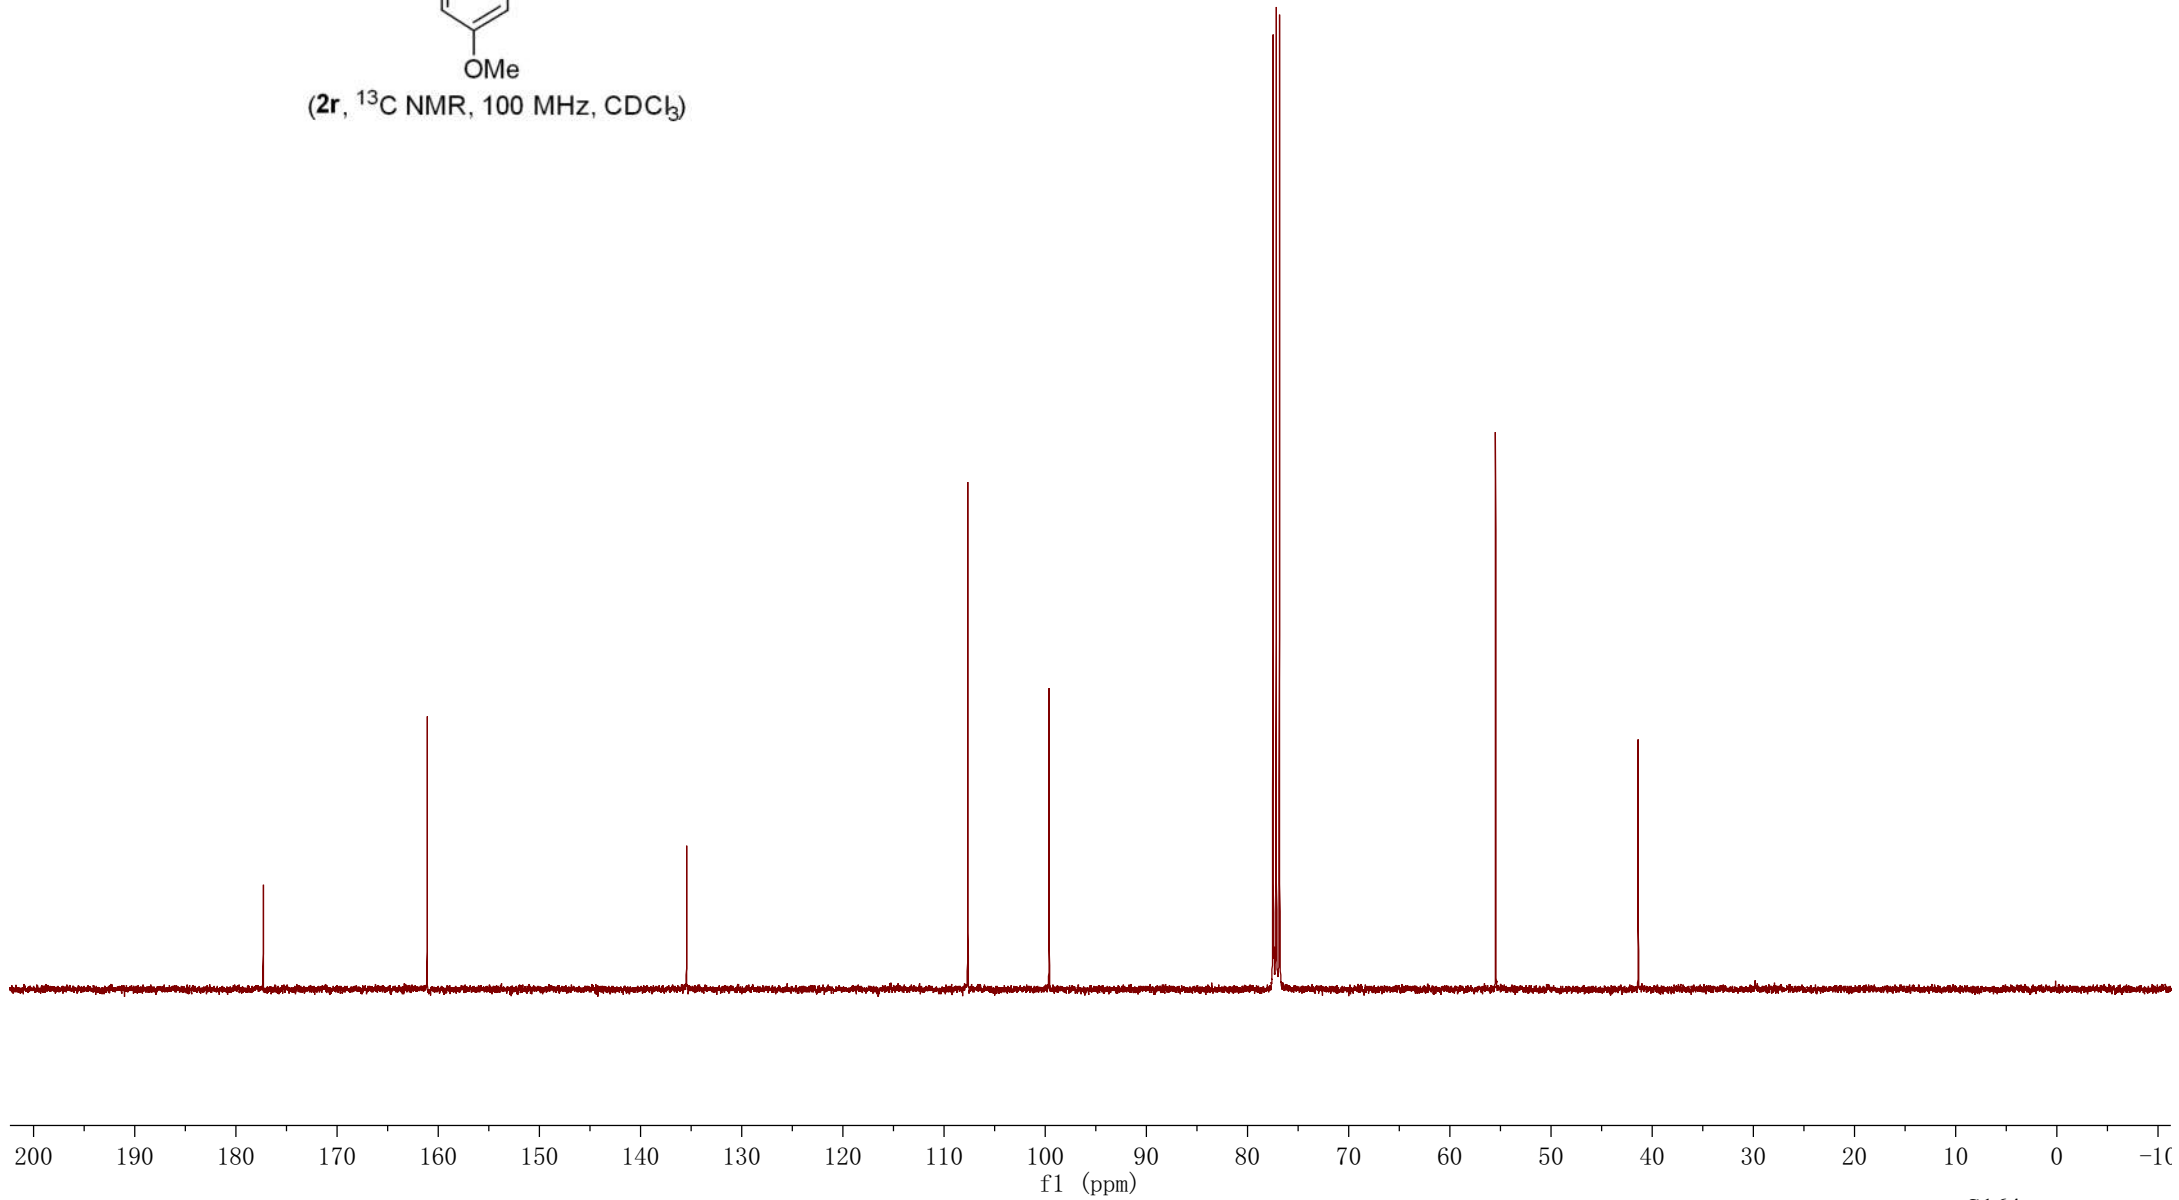

7.974  
7.954  
7.884  
7.865  
7.825  
7.805  
7.556  
7.541  
7.522  
7.518  
7.501  
7.484  
7.458  
7.440  
7.420  
7.402

4.087

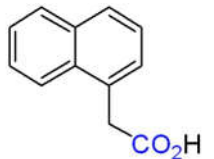

(2s, <sup>1</sup>H NMR, 400 MHz, CDCl<sub>3</sub>)

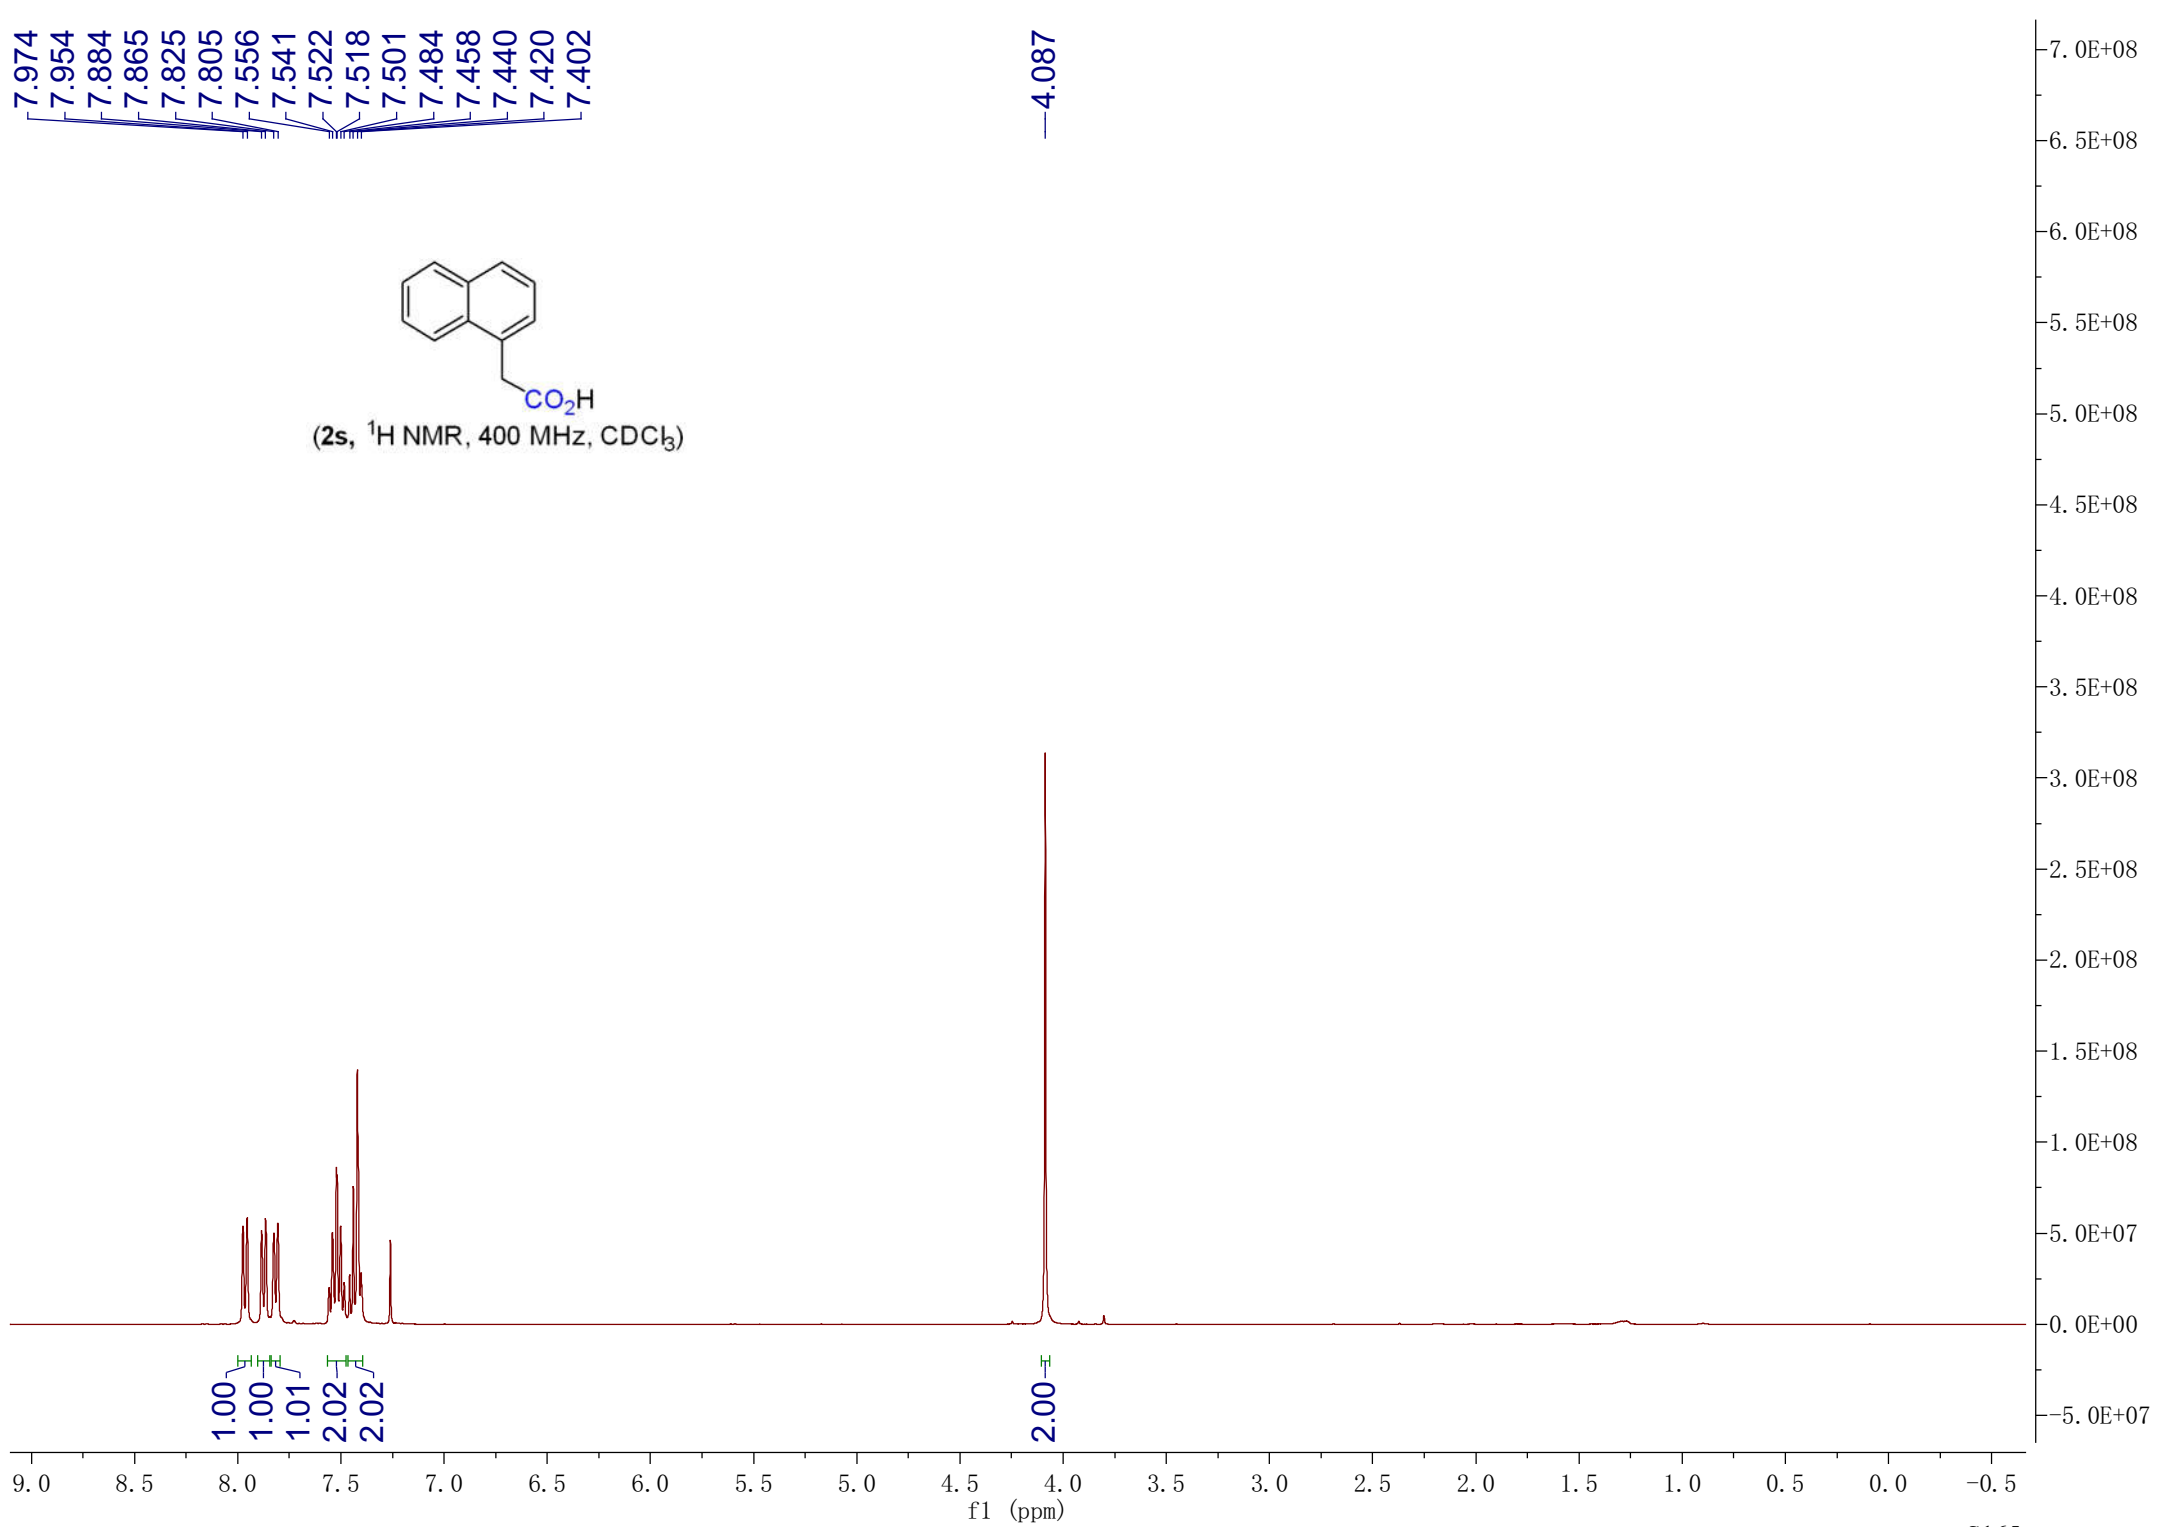

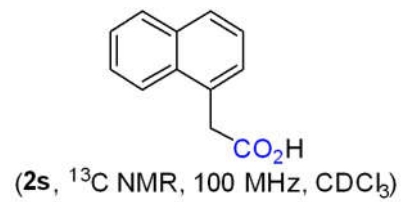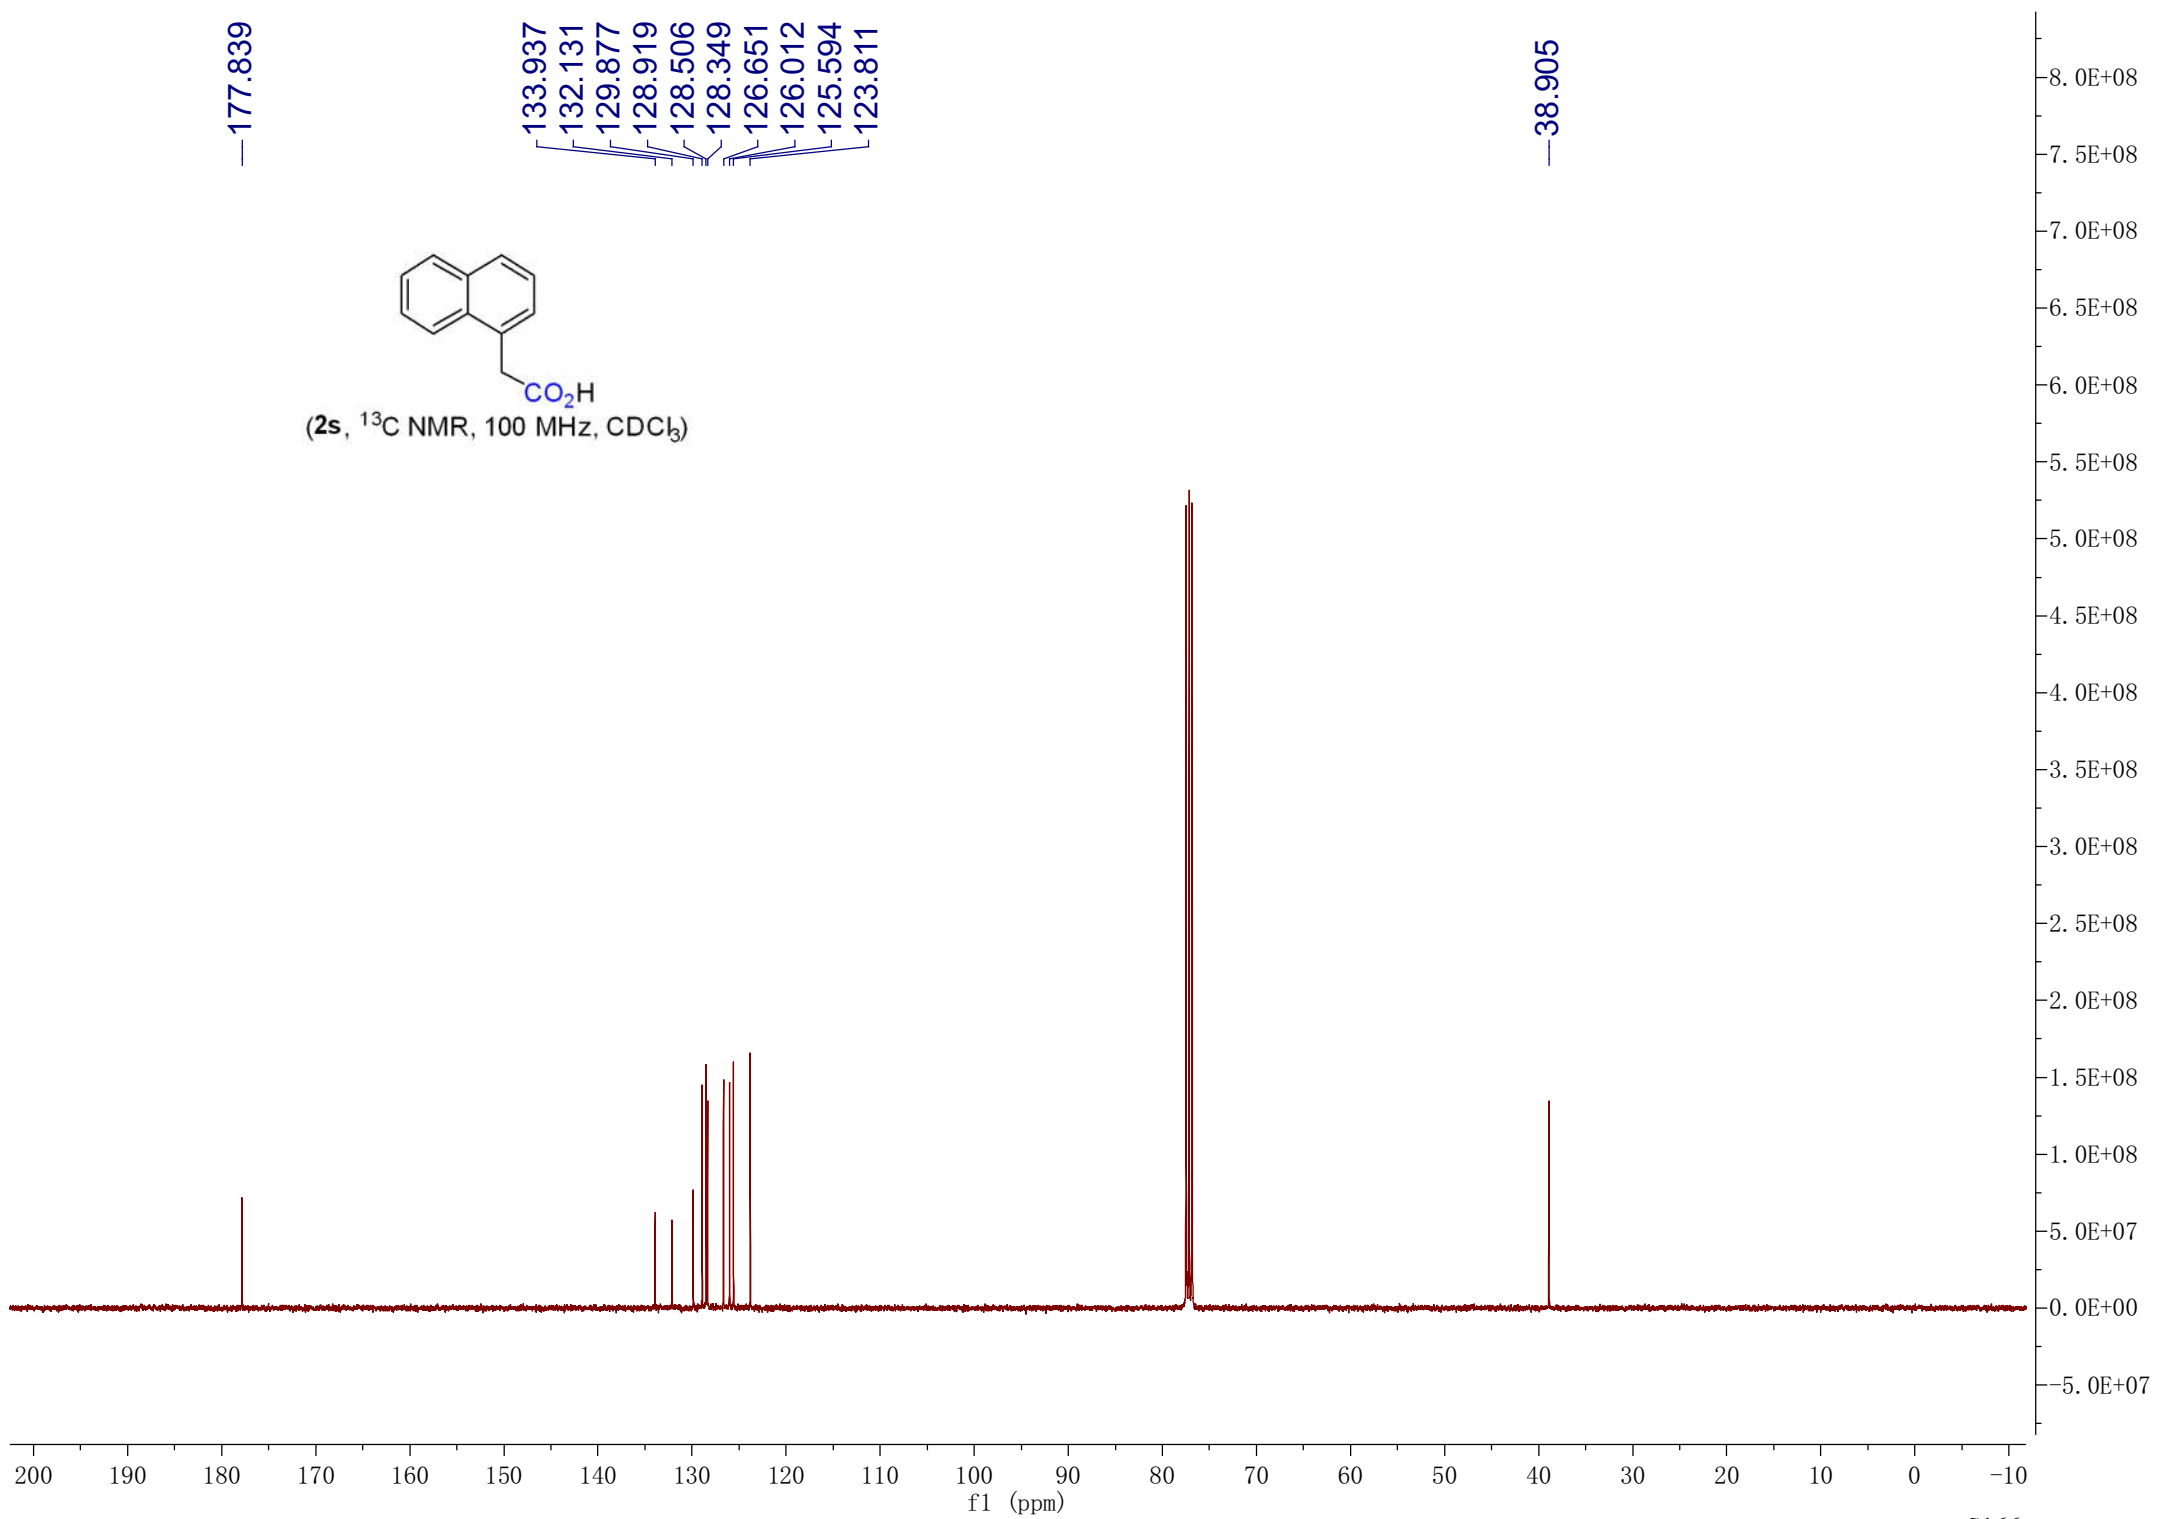

7.829  
7.808  
7.789  
7.738  
7.493  
7.478  
7.468  
7.458  
7.443  
7.424  
7.420  
7.403  
7.399

3.818

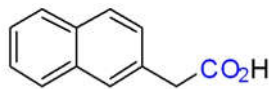

(2t, <sup>1</sup>H NMR, 400 MHz, CDCl<sub>3</sub>)

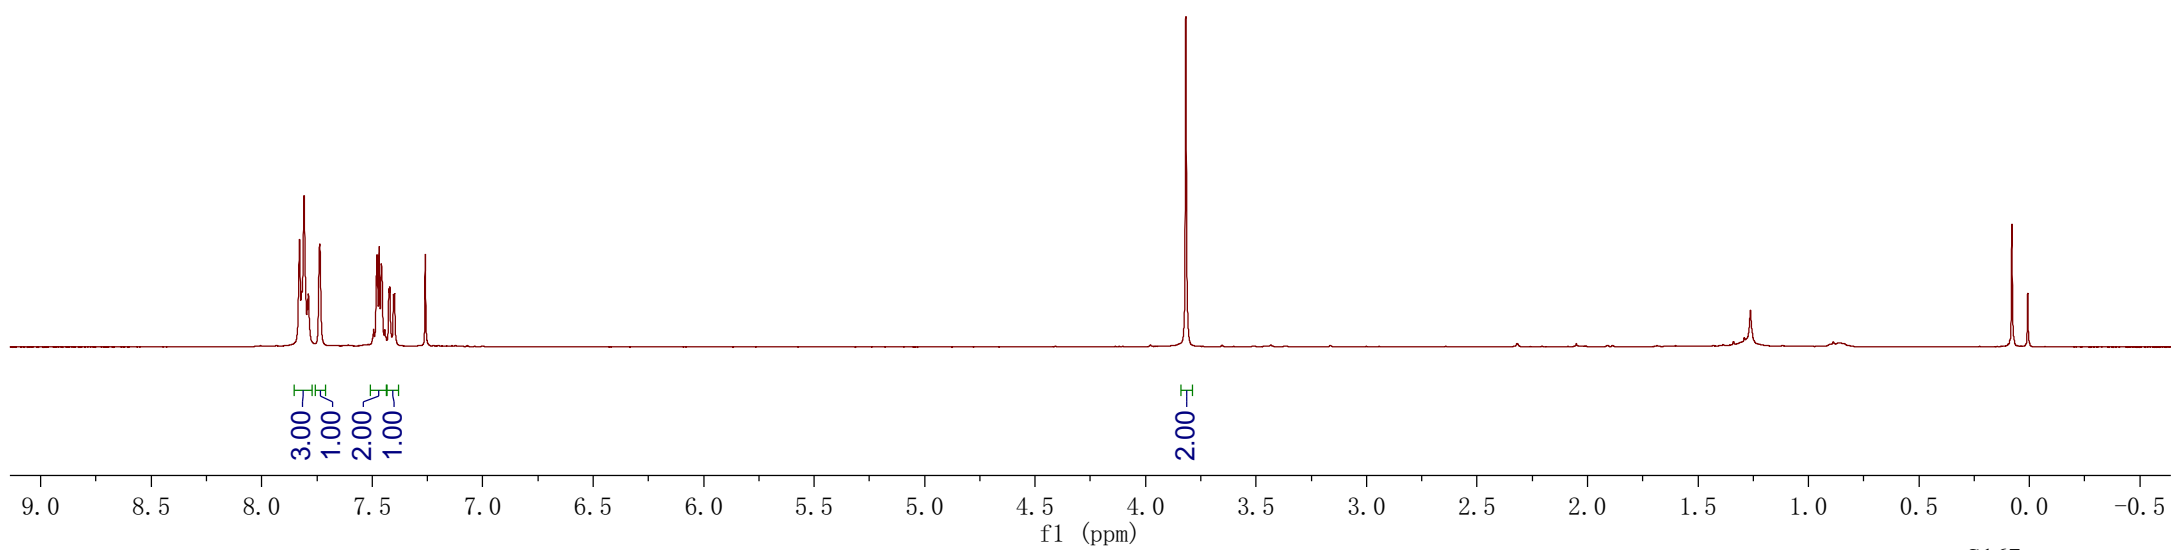

—177.288

133.572  
132.723  
130.873  
128.494  
128.331  
127.834  
127.821  
127.450  
126.395  
126.107

—41.269

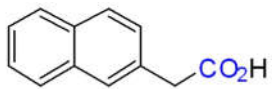

(2t,  $^{13}\text{C}$  NMR, 100 MHz,  $\text{CDCl}_3$ )

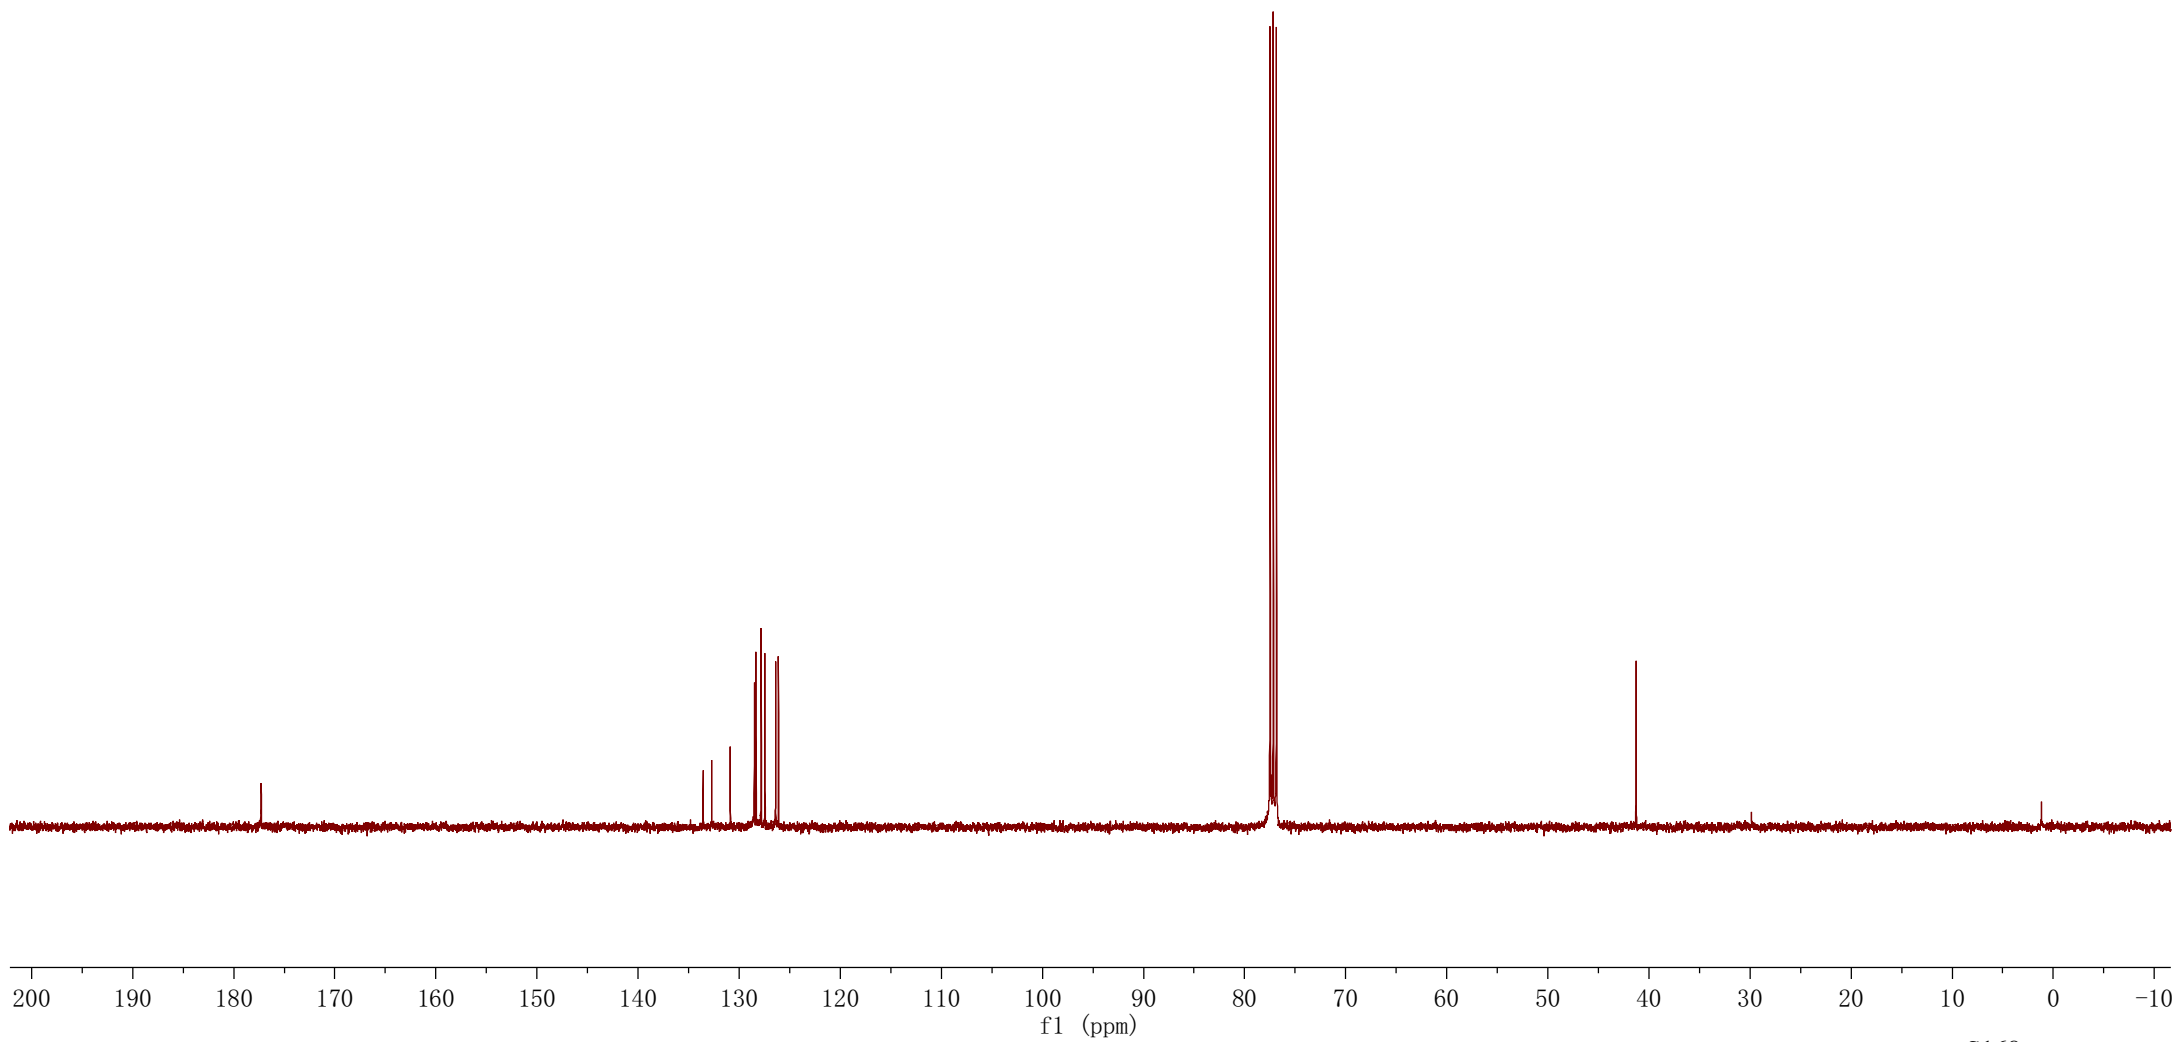



7.347  
7.337  
7.304  
7.297  
7.293  
7.283  
7.270

3.782  
3.764  
3.746  
3.728

1.540  
1.522

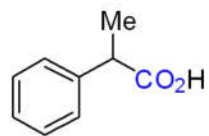

(2u, <sup>1</sup>H NMR, 400 MHz, CDCl<sub>3</sub>)

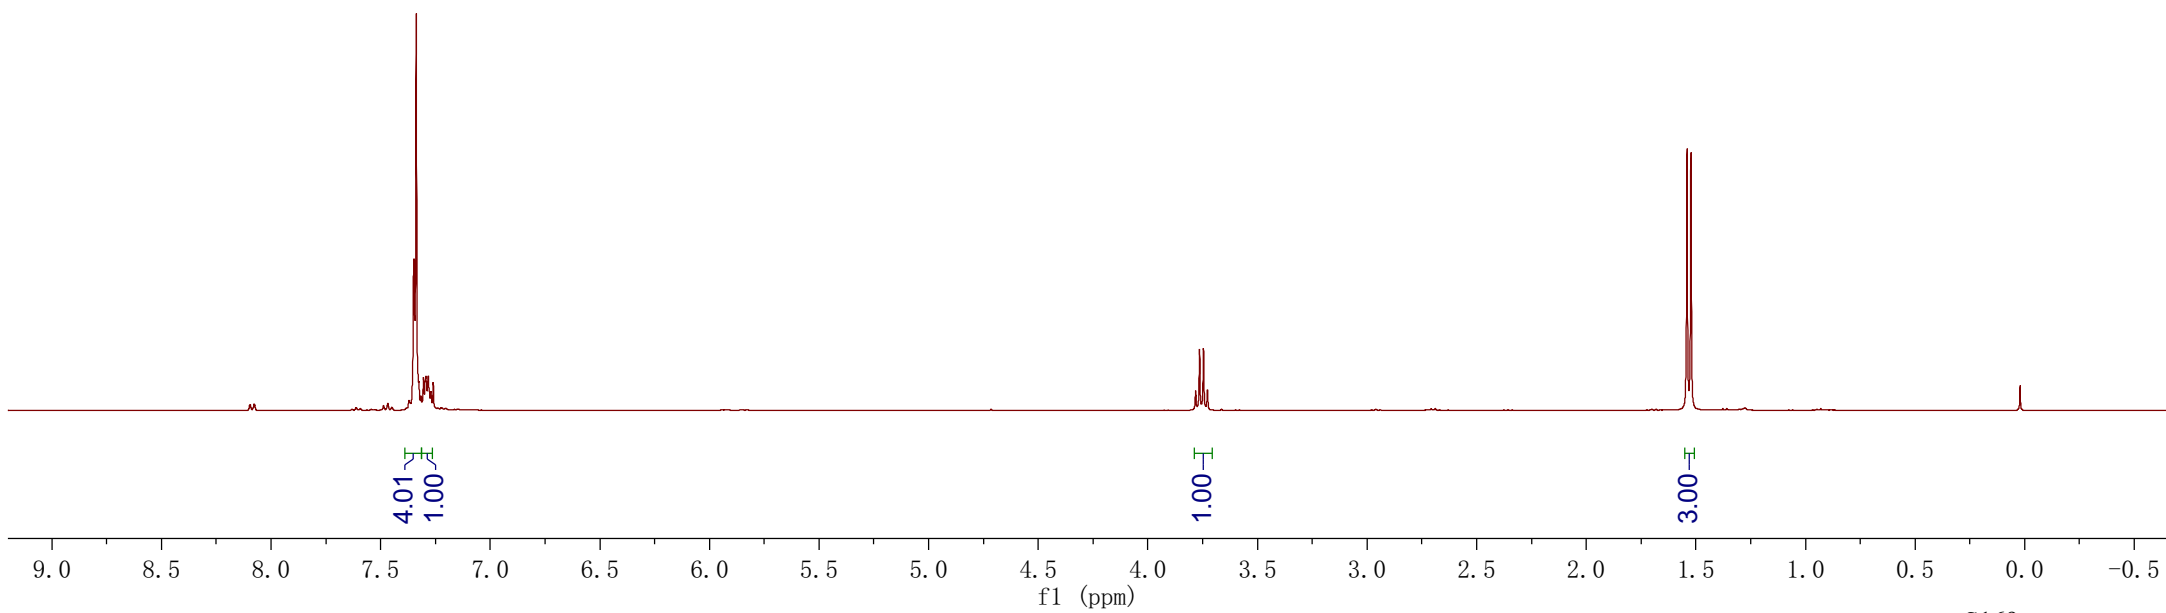

—180.922

—139.910

—128.821

—127.746

—127.529

—45.511

—18.232

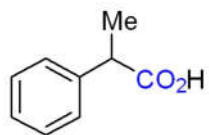

(**2u**,  $^{13}\text{C}$  NMR, 100 MHz,  $\text{CDCl}_3$ )

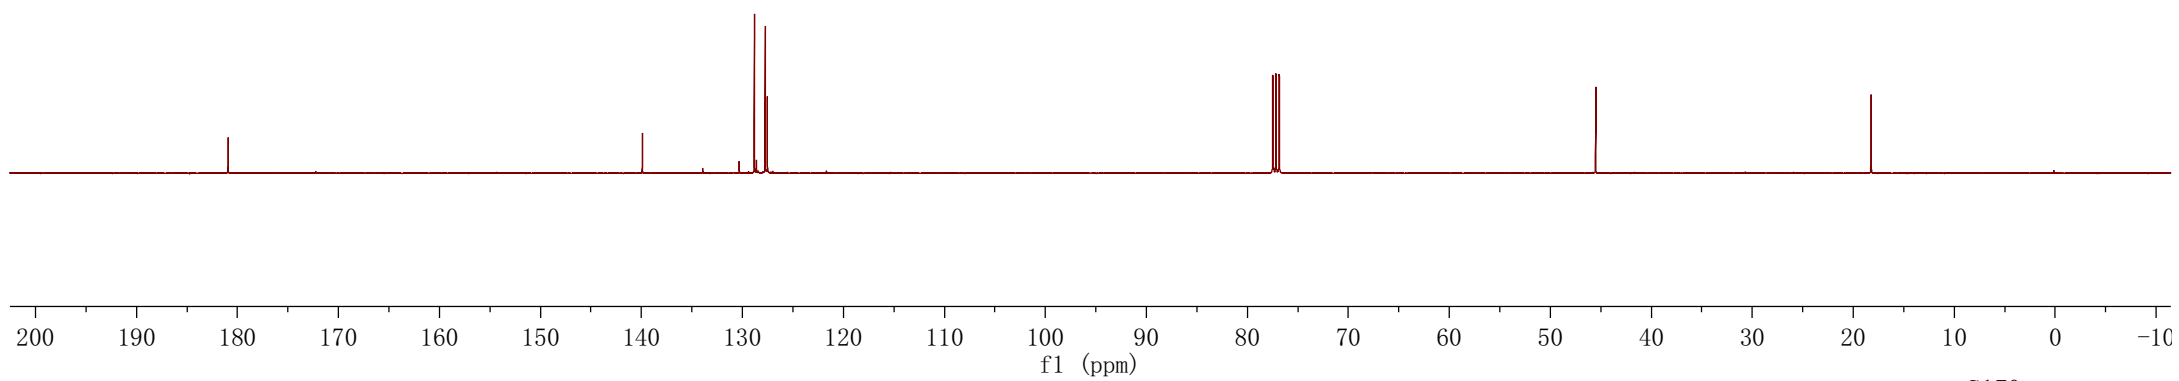

7.250  
7.231  
7.212  
7.139  
7.120  
7.103  
7.085

3.737  
3.719  
3.701  
3.684

2.353

1.518  
1.500

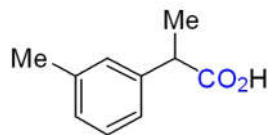

(2v, <sup>1</sup>H NMR, 400 MHz, CDCl<sub>3</sub>)

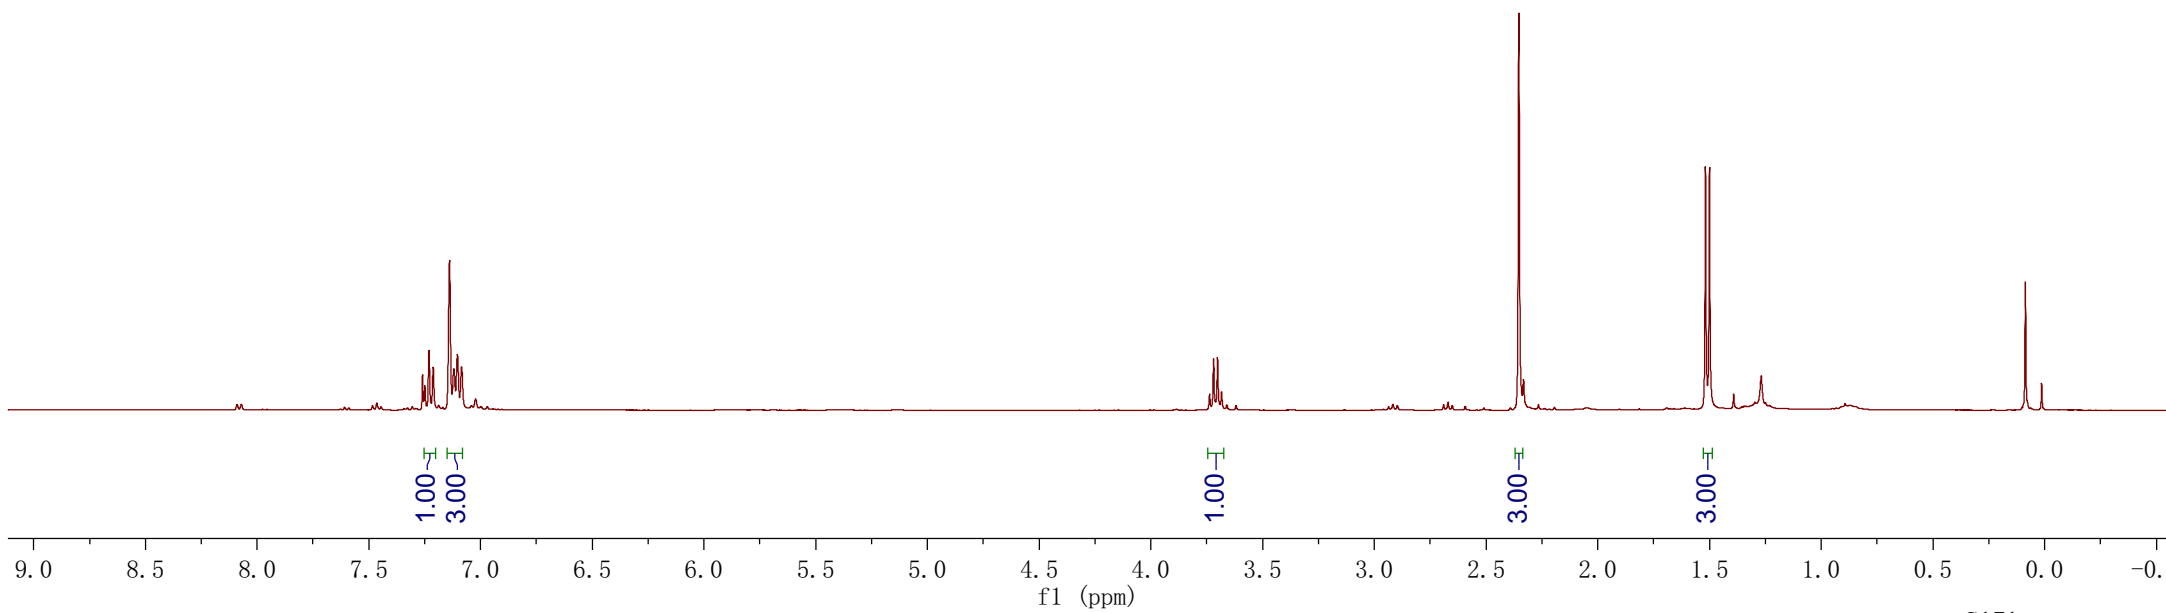

—180.807

139.875  
138.491

128.719  
128.461  
128.299  
124.752

—45.436

—21.546  
—18.237

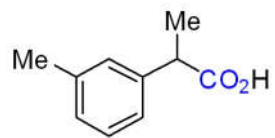

(2v,  $^{13}\text{C}$  NMR, 100 MHz,  $\text{CDCl}_3$ )

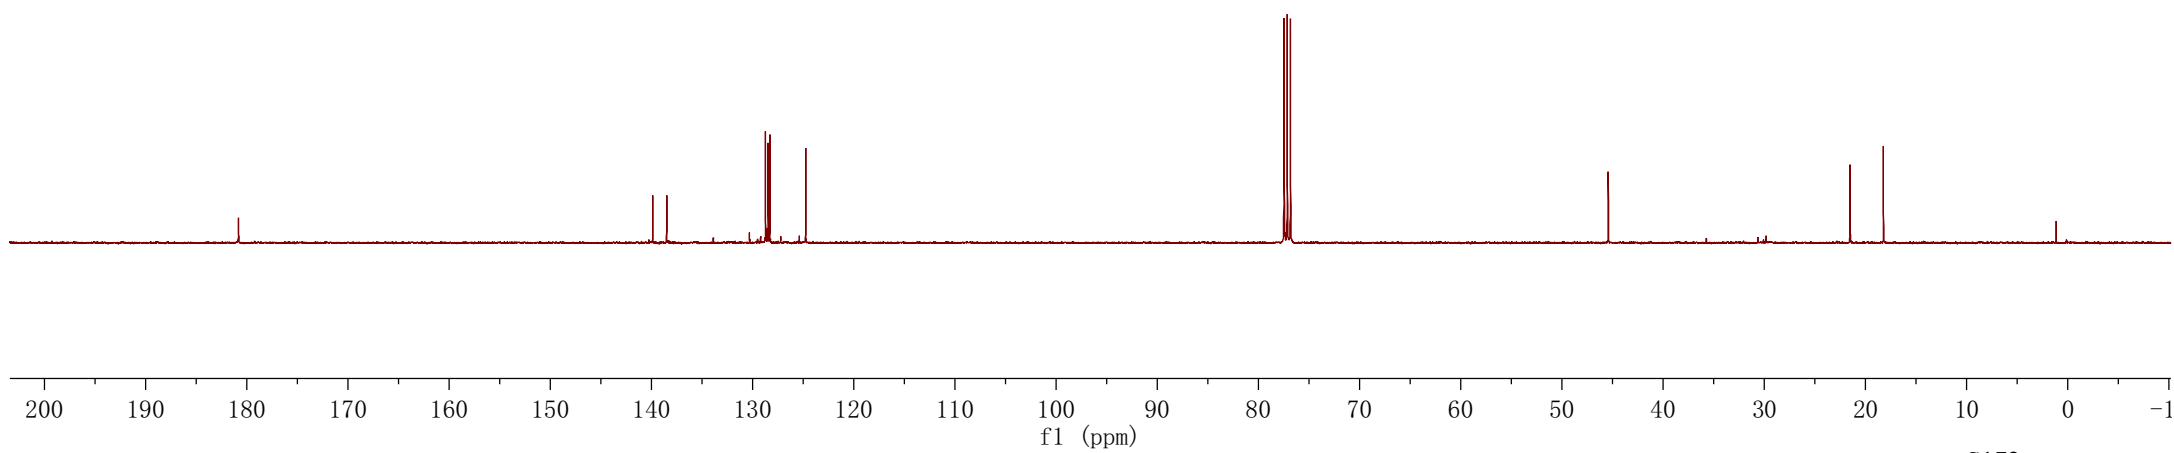

7.314  
7.309  
7.295  
7.293  
7.279  
7.274  
7.240  
7.220  
7.214  
7.085  
7.067  
7.048  
7.031  
7.012  
6.986  
6.983  
6.974  
6.969  
6.964  
6.860  
6.856  
6.841  
6.840  
6.836

3.703  
3.685  
3.667  
3.649

1.473  
1.455

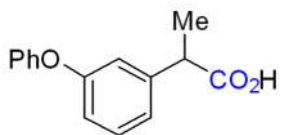

(2w, <sup>1</sup>H NMR, 400 MHz, CDCl<sub>3</sub>)

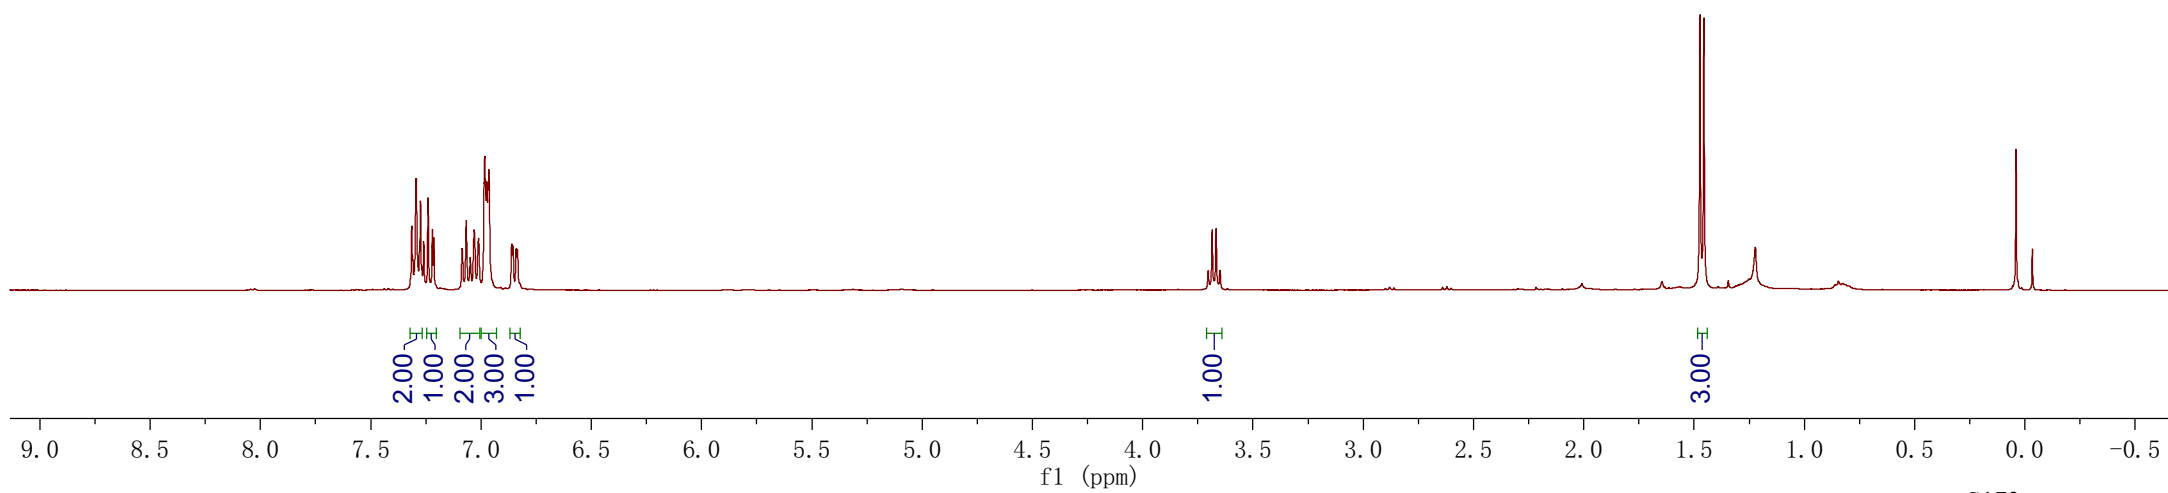

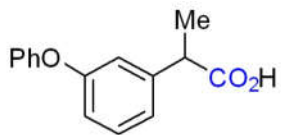

(2w, <sup>13</sup>C NMR, 100 MHz, CDCl<sub>3</sub>)

—180.270

—157.651  
—157.098

—141.846

—130.023  
—129.911  
—123.521  
—122.510  
—119.127  
—118.389  
—117.650

—45.327

—18.206

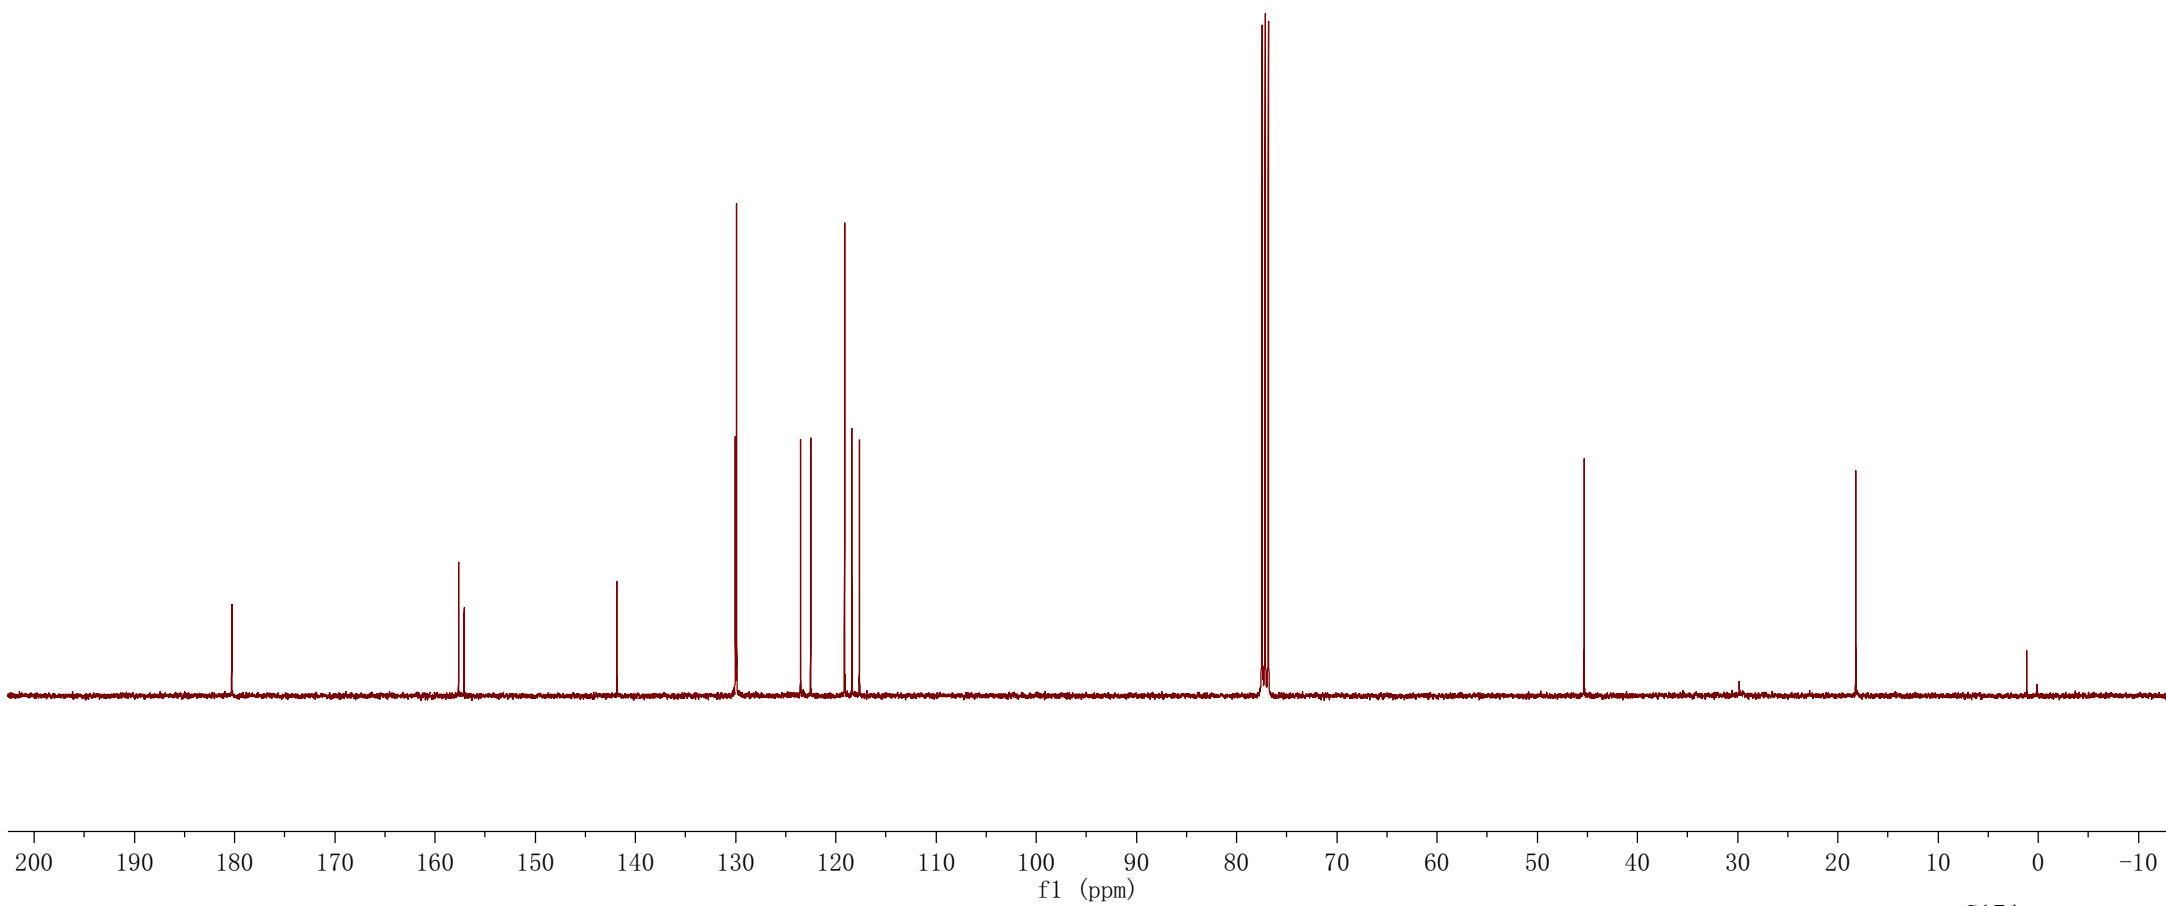

7.312  
7.295  
7.228  
7.216  
7.205  
7.197  
7.183  
7.181  
7.172

4.020  
4.002  
3.984  
3.966

2.390

1.509  
1.492

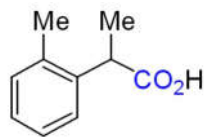

(2x, <sup>1</sup>H NMR, 400 MHz, CDCl<sub>3</sub>)

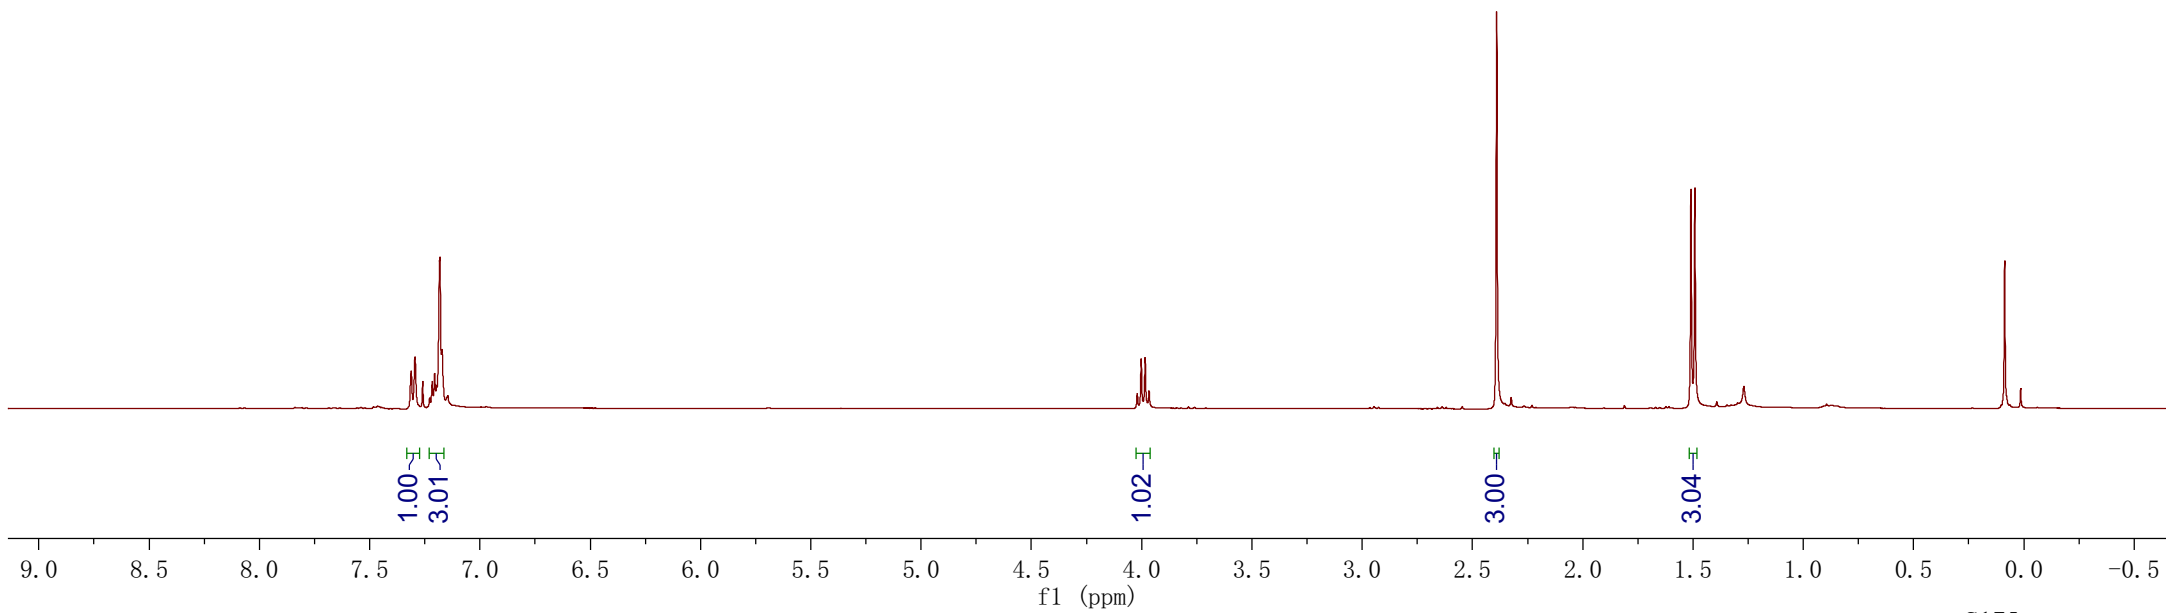

—180.890

138.496  
136.057  
130.688  
127.339  
126.710  
126.602

—41.247

19.769  
17.667

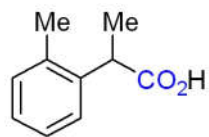

(2x, <sup>13</sup>C NMR, 100 MHz, CDCl<sub>3</sub>)

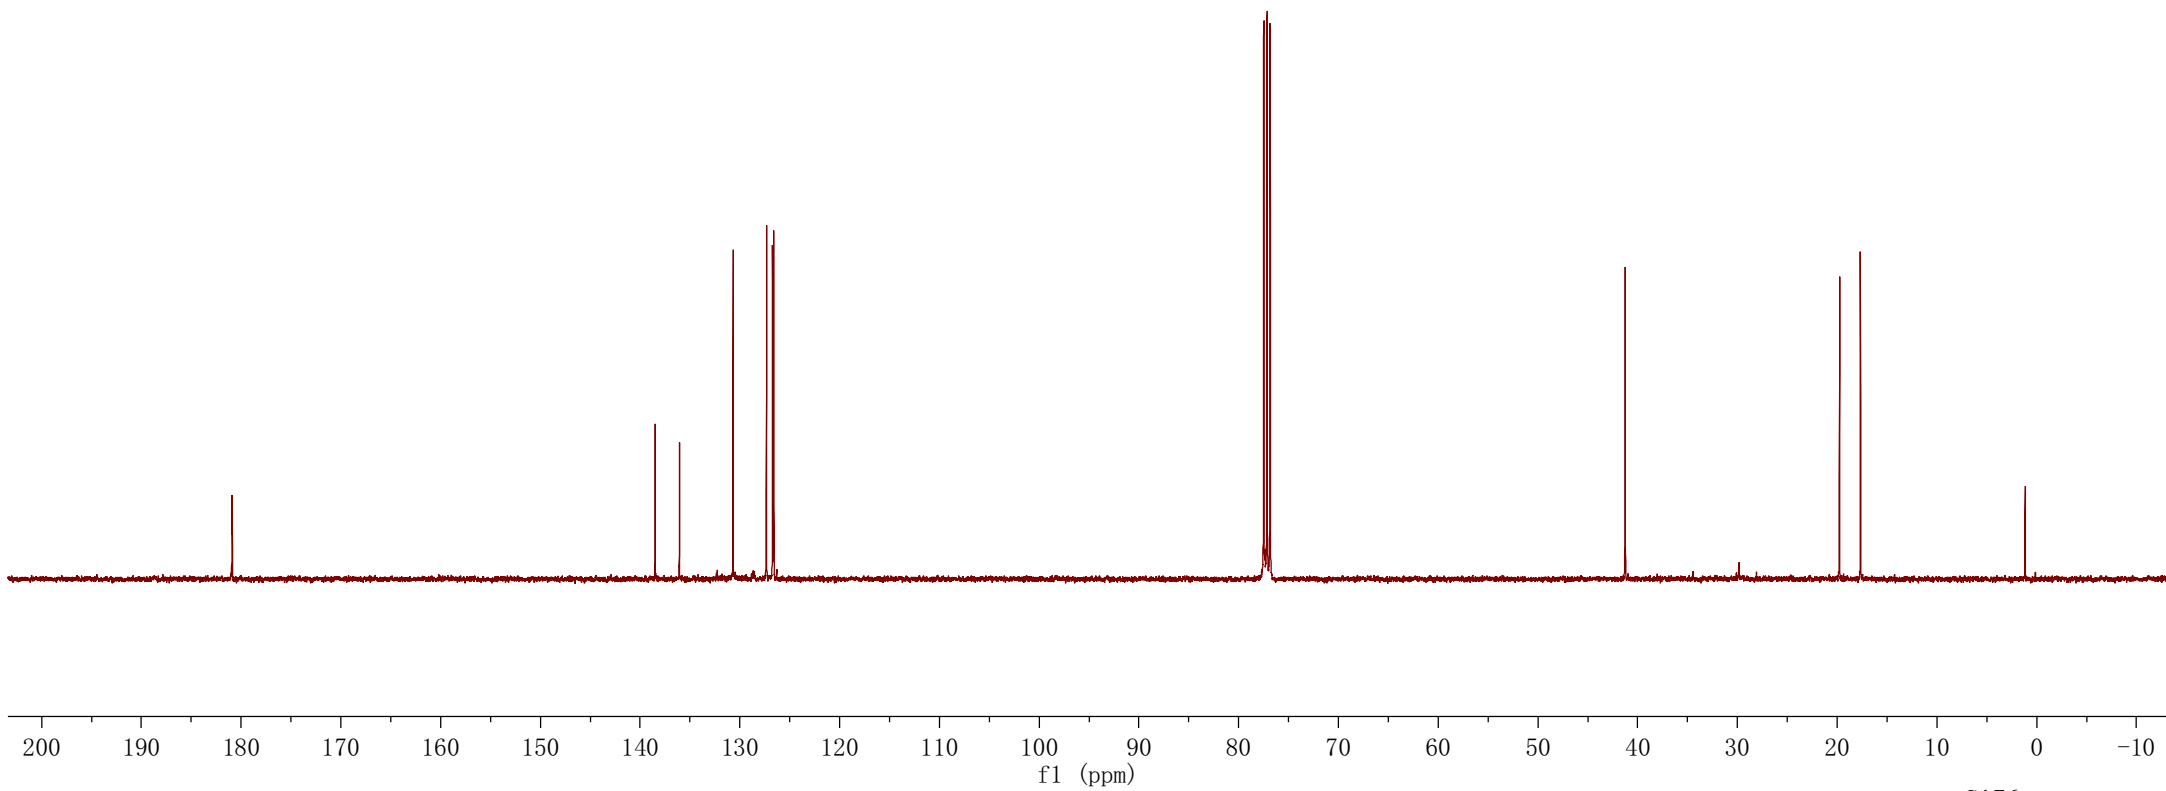



7.227  
7.207  
7.158  
7.138

3.733  
3.715  
3.697  
3.679

2.335

1.506  
1.488

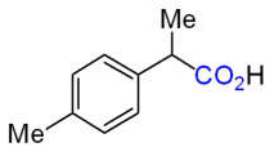

(2y, <sup>1</sup>H NMR, 400 MHz, CDCl<sub>3</sub>)

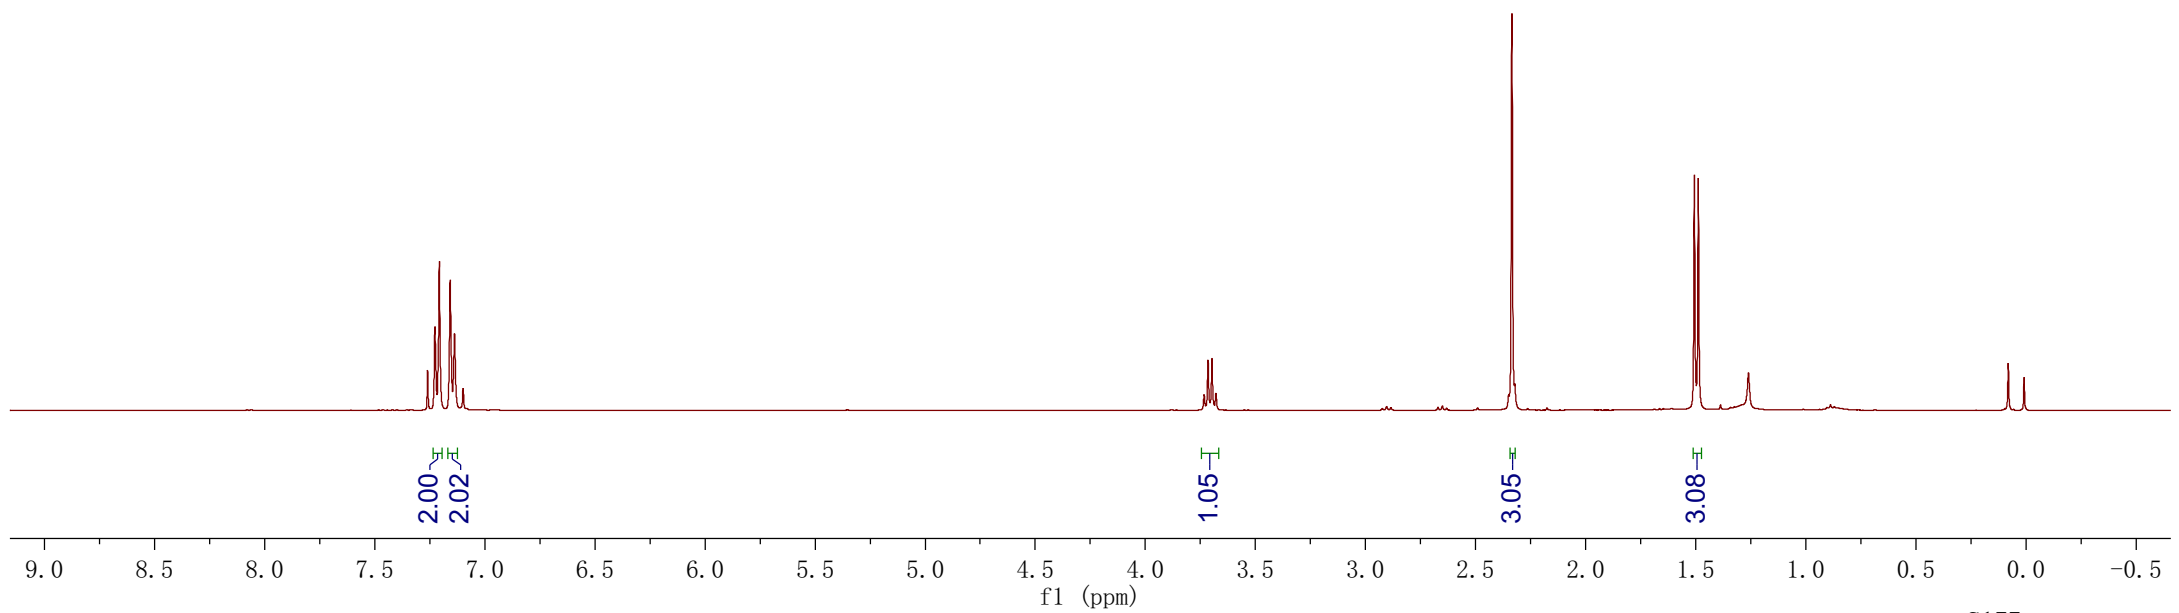

—181.0

—137.2  
—136.9

—129.5  
—127.6

—45.0

—21.2  
—18.2

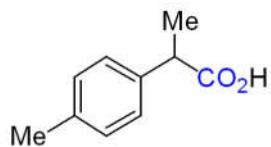

(2y, <sup>13</sup>C NMR, 100 MHz, CDCl<sub>3</sub>)

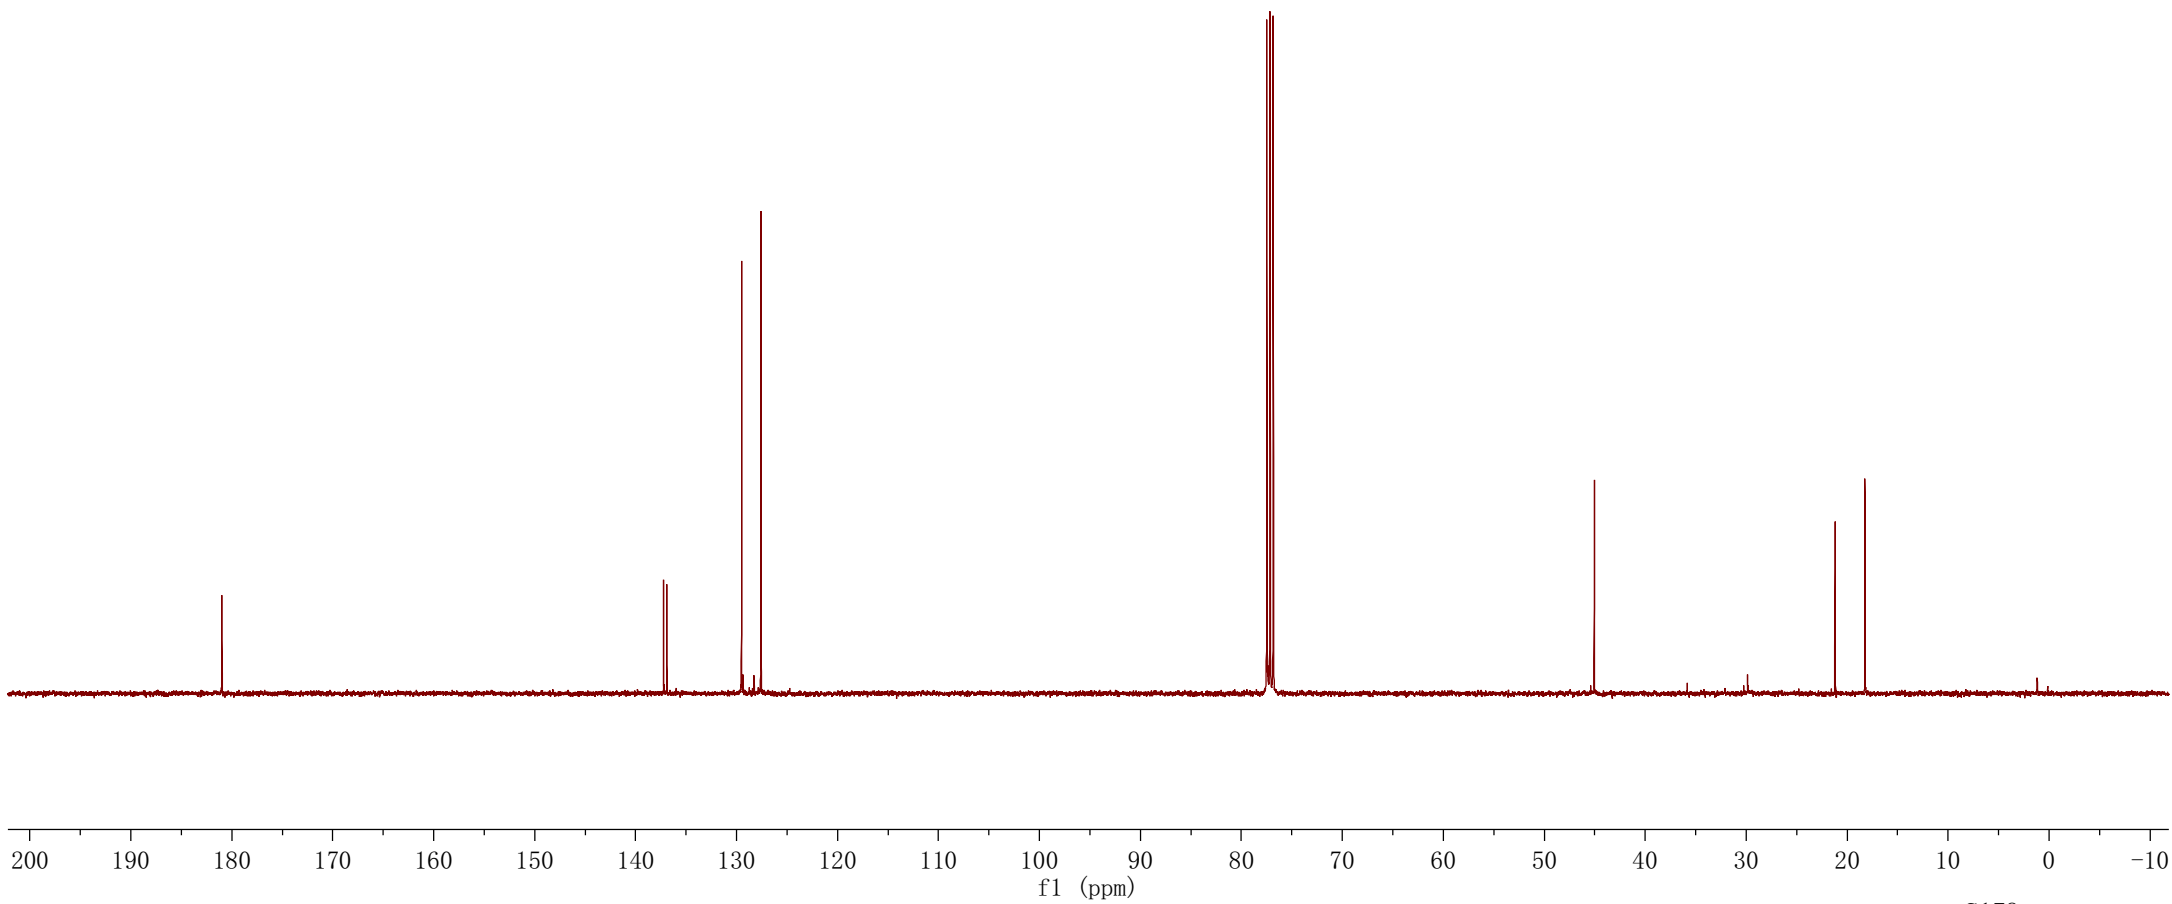

7.319  
7.297  
7.268  
7.246

3.747  
3.729  
3.711  
3.693

1.512  
1.494

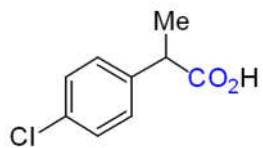

(2z, <sup>1</sup>H NMR, 400 MHz, CDCl<sub>3</sub>)

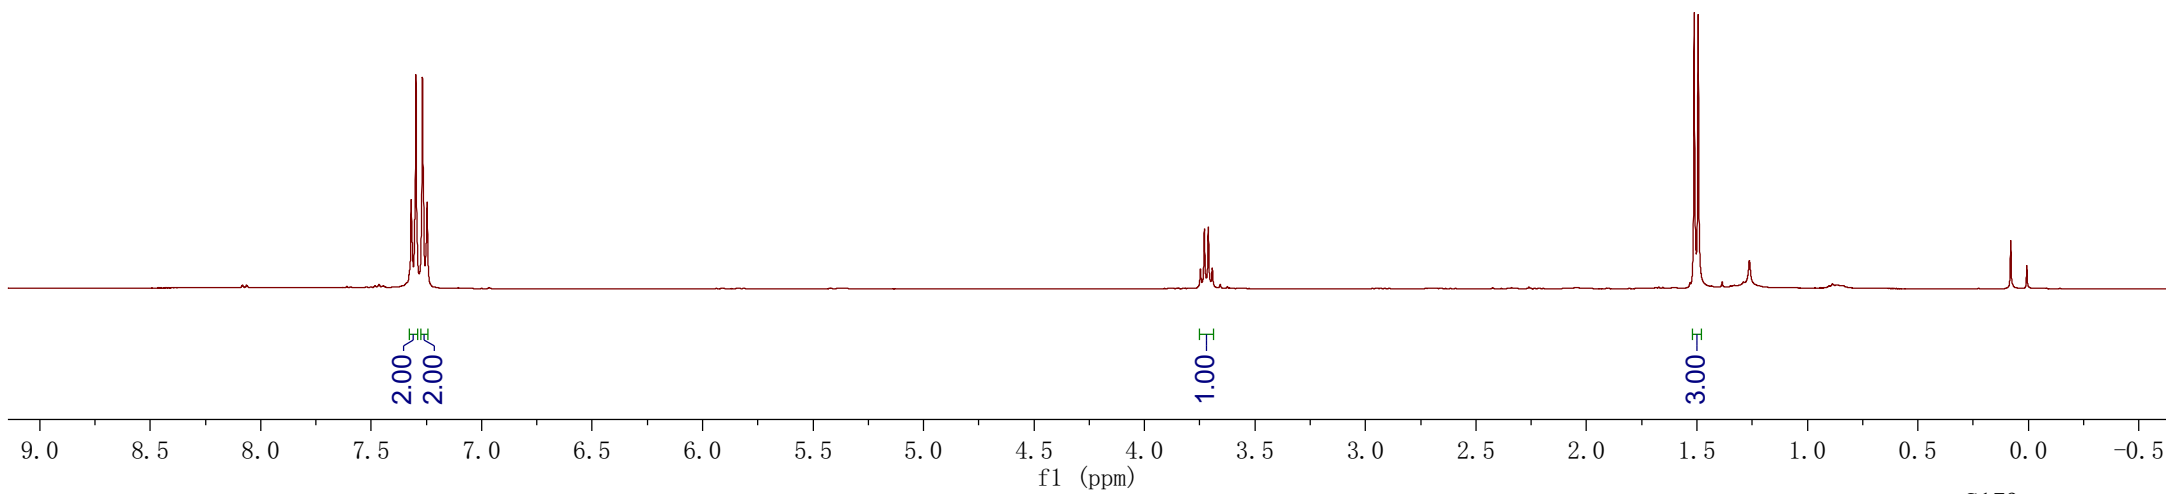

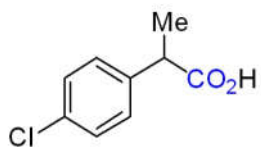

(2z, <sup>13</sup>C NMR, 100 MHz, CDCl<sub>3</sub>)

—180.340

—138.286

—133.465

—129.146

—128.974

—44.878

—18.198

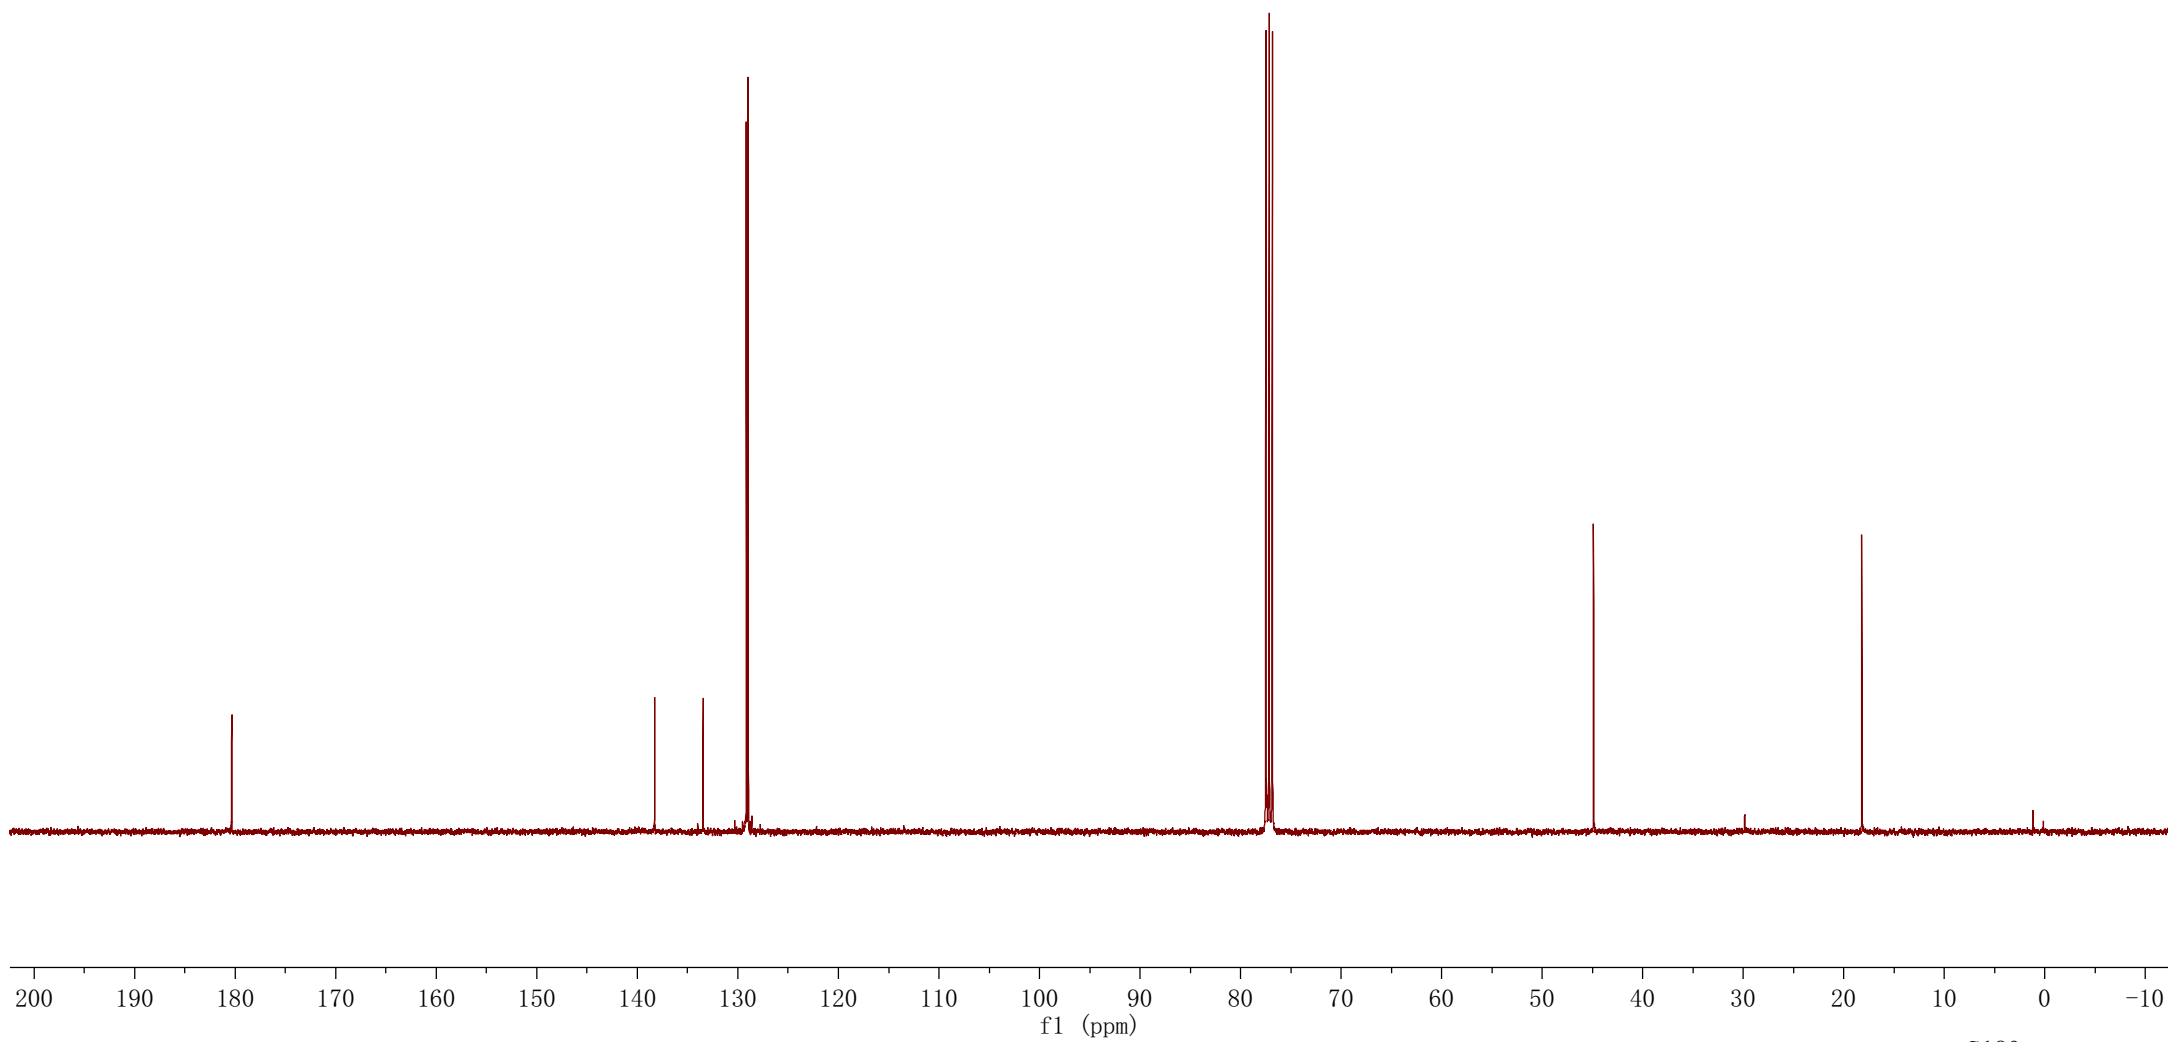

7.297  
7.290  
7.285  
7.278  
7.153  
7.148  
7.048  
7.036

3.708  
3.667

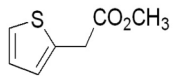

(2a', <sup>1</sup>H NMR, 400 MHz, DMSO-d<sub>6</sub>)

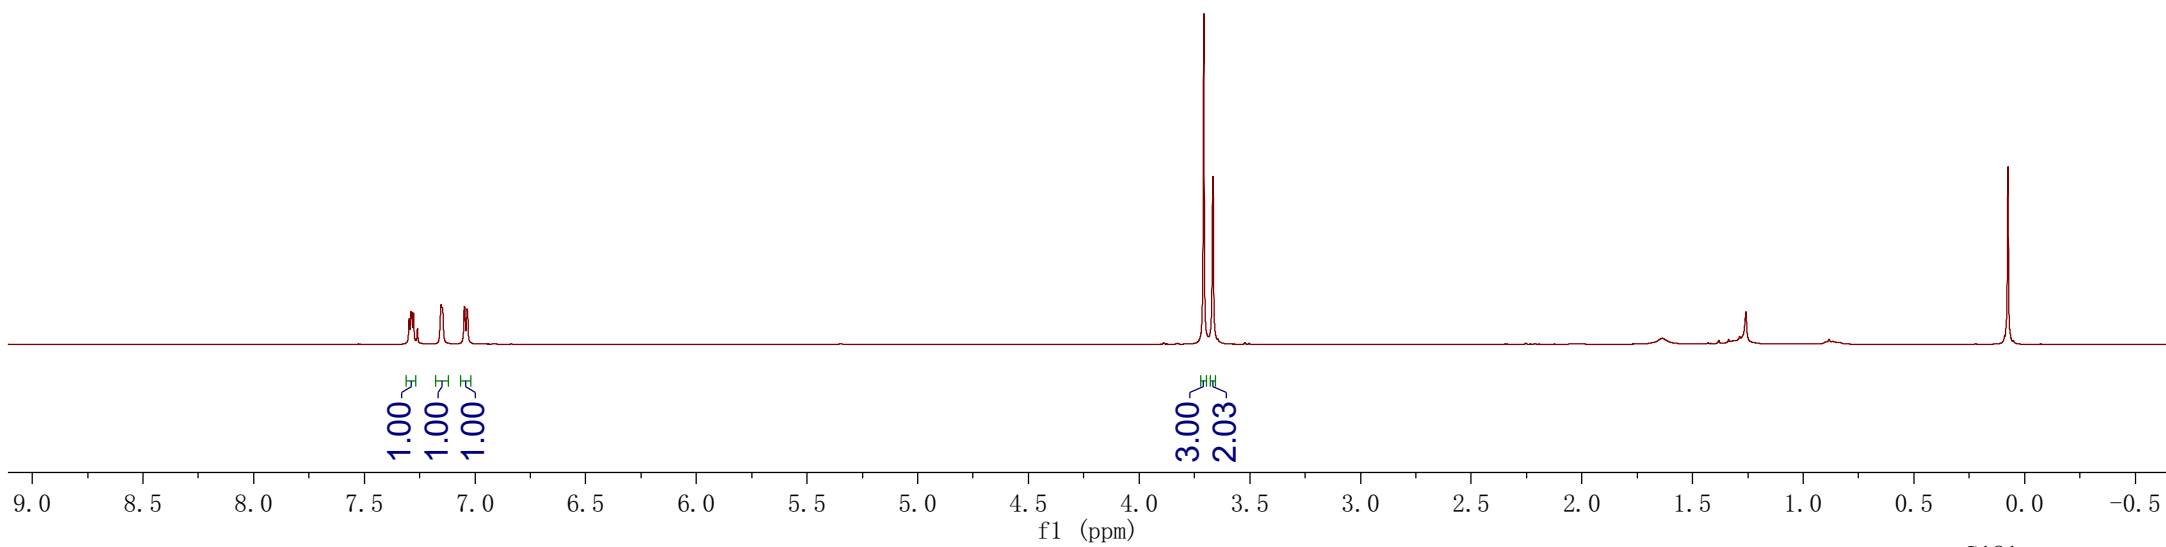

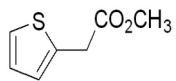

(2a',  $^{13}\text{C}$  NMR, 100 MHz, DMSO- $d_6$ )

—171.710

~133.661

~128.601

~125.875

~123.007

—52.176

—35.776

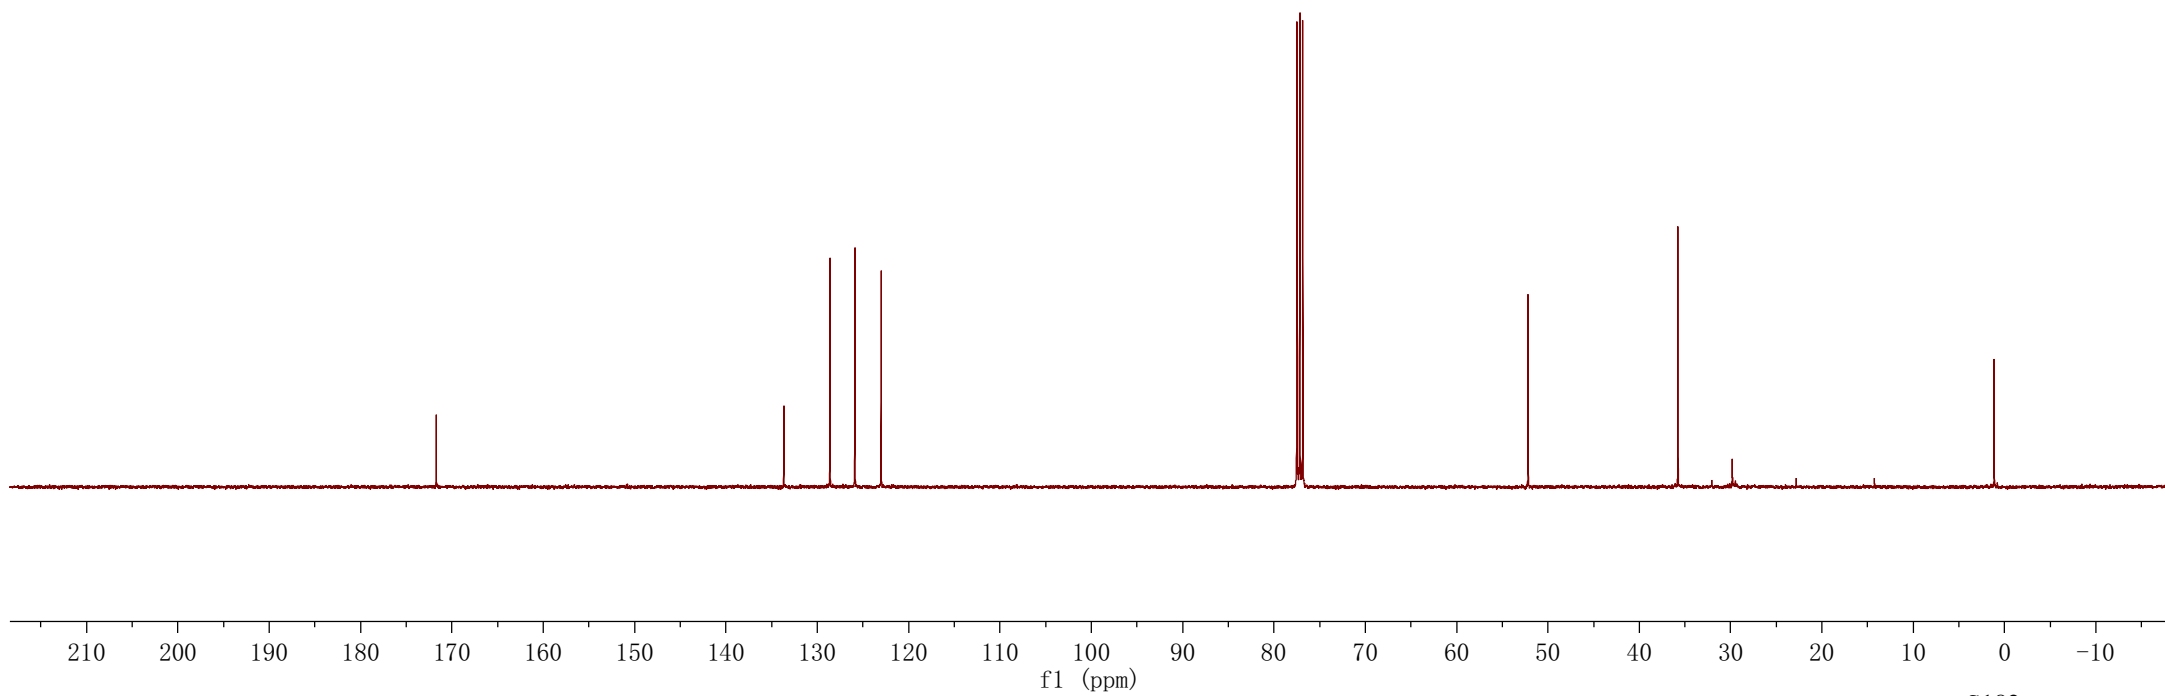

Supplement: d4ob00838c1.pdf [file d4ob00838c1.pdf]
